# Supplementary material for: Transcriptomic analysis reveals insights into the response to Hop stunt viroid (HSVd) in sweet cherry (Prunus avium L.) fruits
Source: PeerJ. 2020 Sep 21;8:e10005. doi: 10.7717/peerj.10005 (PMC7513744; doi:10.7717/peerj.10005)
Supplement: Supplemental Information 1 — Gene ID: gene designation number; GDF: green Dapple Fruit; GHF: green Healthy Fruit. [file peerj-08-10005-s001.xls]

## Sheet: S1
Table S1. Specific primer sequences of 16 selected genes used for RT-qPCR validation of RNA-seq and the correlation between RT-qPCR and RNA-seq.
Gene ID	Gene	Forward primer (5'-3')	Reverse primer (5'-3')	GDF_readcount(GDFvsGHF)	GHF_readcount(GDFvsGHF)	log2[RNA-seq(GDF/GHF)]	RNA-Seq:regulation	GDF_qPCR	GHF_qPCR	log2[RT-qPCR(GDF/GHF)]	RT-qPCR:regulate	correlation
Pav_sc0001323.1_g1090.1.mk	peroxidase	ATGGCACCAGGTTGTGATGG	TCCAACTCTGCCTTGGCTTT	6.305	0	12.622	UP	8.51	1	3.089	UP	yes
Pav_sc0001196.1_g1100.1.mk	CYP98A	TGGACACCACAGCCATAACC	TCTAGCTCCTCTTGGGCCTT	26.768	2.461	3.443	UP	4.028	1	2.01	UP	yes
Pav_sc0001077.1_g280.1.mk	MAP3K2	GGCCTAATGCAGCTAACCCA	TCTGTTGGGTCCCTCCTCAA	935.231	118.475	2.981	UP	4.107	1	2.038	UP	yes
Pav_sc0002858.1_g200.1.mk	PP2C	CCGCATGACAAATAAGGTGGG	TCCGCAAACGGATAAGAAGGG	29387.6	4316.85	2.767	UP	2.165	1	1.114	UP	yes
Pav_sc0000484.1_g710.1.mk	CML	CTTGCAGGGCTGTTTGATGAG	AGAGAACTCTCTGCAACTCCC	57.866	10.793	2.423	UP	1.484	1	0.57	UP	yes
Pav_sc0000729.1_g240.1.br	CBDAS	TTCAAGCTGGTGCCTCCATT	CACCACCAGTTATGTGCCCT	554.882	105.534	2.394	UP	1.882	1	0.912	UP	yes
Pav_sc0000440.1_g200.1.mk	CPK	CGCTGAGGCTGAGTCTTTGT	GAATCCACCAACCAGCAGAGA	22.634	4.433	2.352	UP	1.312	1	0.391	UP	yes
Pav_co4071347.1_g010.1.mk	PAL	AGAAGTTGCACGAGCAGGAC	ACCGAGCCATTGAGGTGAAG	1225.44	291.836	2.07	UP	1.352	1	0.435	UP	yes
Pav_sc0000983.1_g260.1.mk	AUX	AACTGGATCTTAAGTTTGAAGTACG	ACTGGTACGTACATGATTATGCTT	237.328	1188.26	-2.324	DOWN	0.373	1	-1.424	DOWN	yes
Pav_sc0000480.1_g090.1.mk	CNGC	GGTTTGTTGTGGCATTGAGT	CGCTTGGATGGCAAGGAATC	2.042	12.592	-2.625	DOWN	0.385	1	-1.379	DOWN	yes
Pav_sc0000257.1_g1070.1.mk	PME	TCCTGCAGGTTGGCATGATT	CCCTATTGGCAGTGCTGGAT	1.46	18.041	-3.628	DOWN	0.66	1	-0.6	DOWN	yes
Pav_sc0000009.1_g240.1.mk	PG	GGGAAGAAGGGTGAGAGTTGG	GCACCATTGTTGTTCCCAGT	0	6.178	-12.593	DOWN	0.751	1	-0.413	DOWN	yes
Pav_sc0007510.1_g020.1.mk	CHI	CAACCCTGTCCTAATGACACCA	TGGCGATGGAGATGGACTTG	5.38	258.664	-5.587	DOWN	0.866	1	-0.208	DOWN	yes
Pav_sc0002584.1_g370.1.mk	BHLH	ACGGAAAGGCTGCTCAAAC	CGGAGGTTGTGTTTGGGTATTT	6.402	314.706	-5.619	DOWN	0.449	1	-1.156	DOWN	yes
Pav_sc0000586.1_g490.1.mk	MYB	GGCGGTGAAACACAAGAACA	CCCTAGTGGGTTTTGGGAGG	12.283	0	13.584	UP	11.191	1	3.484	UP	yes
Pav_sc0001582.1_g320.1.mk	WRKY	ACCGGAACCTTCCCATTCAC	CTCCGATCCTTGGAACCCTG	255.322	37.998	2.748	UP	2.085	1	1.06	UP	yes
internal reference gene	β-actin	TTGTGCTGGACTCTGGTGATG	GCTCAGCAGTGGTGGTGAAC
Gene ID: Gene designation number
GDF: Green Dapple Fruit
GHF: Green Healthy Fruit
