# Supplementary material for: Transcriptomic analysis reveals insights into the response to Hop stunt viroid (HSVd) in sweet cherry (Prunus avium L.) fruits
Source: PeerJ. 2020 Sep 21;8:e10005. doi: 10.7717/peerj.10005 (PMC7513744; doi:10.7717/peerj.10005)
Supplement: Supplemental Information 2 — Gene ID: gene designation number; fpkm: expected number of Fragments Per Kilobase of transcript sequence per Millions base pairs sequenced; p-value: statistical significance test index; padj: the corrected p-value; COG: cluster of Orthologous Groups of proteins; GO: gene Ontology; KEGG: kyoto Encyclopedia of Genes and Genomes; nr: refSeq non-redundant proteins. [file peerj-08-10005-s002.xlsx]

## Sheet: Sheet1
Table S2. Annotation of DEGs of HSVd-responsive sweet cherry fruits transcriptome.
Gene ID	chromosome	GHF1_readcount	GHF2_readcount	GHF3_readcount	GDF1_readcount	GDF2_readcount	GDF3_readcount	GHF1_fpkm	GHF2_fpkm	GHF3_fpkm	GDF1_fpkm	GDF2_fpkm	GDF3_fpkm	GHF_group_fpkm	GDF_group_fpkm	GDF_readcount(GDFvsGHF)	GHF_readcount(GDFvsGHF)	log2FoldChange(GDFvsGHF)	pval(GDFvsGHF)	padj(GDFvsGHF)	significant(GDFvsGHF)	biological_process	biological_process_description	cellular_component	cellular_component_description	molecular_function	molecular_function_description	KEGG AnnotInfo	KEGG url	Description
Pav_sc0000207.1_g700.1.br	Pav_sc0000207.1	0	0	0	1109	1237	1026	0	0	0	74.2119	103.383	60.9112	0	79.5021	1075.13	0	Inf	1.6889e-38	3.5299e-36	UP	--	--	--	--	GO:0003674//GO:0005515//GO:0005488	molecular_function//protein binding//binding	K00799 glutathione S-transferase [EC:2.5.1.18] | (RefSeq) hypothetical protein	http://www.genome.jp/dbget-bin/www_bget?pper:PRUPE_ppa023716mg	PREDICTED: glutathione transferase GST 23-like
Pav_sc0006715.1_g020.1.mk	Pav_sc0006715.1	0	0	0	706	633	763	0	0	0	20.8702	23.3703	20.0104	0	21.417	654.784	0	Inf	5.1518e-133	2.1356e-129	UP	--	--	GO:0005882//GO:0043228//GO:0044422//GO:0005622//GO:0005575//GO:0043232//GO:0032991//GO:0044424//GO:0044446//GO:0005856//GO:0043226//GO:0044430//GO:0044464//GO:0043229//GO:0045111//GO:0005623//GO:0043234	intermediate filament//non-membrane-bounded organelle//organelle part//intracellular//cellular_component//intracellular non-membrane-bounded organelle//macromolecular complex//intracellular part//intracellular organelle part//cytoskeleton//organelle//cytoskeletal part//cell part//intracellular organelle//intermediate filament cytoskeleton//cell//protein complex	GO:0003674//GO:0005198	molecular_function//structural molecule activity	no KO assigned | (RefSeq) hypothetical protein	http://www.genome.jp/dbget-bin/www_bget?pper:PRUPE_ppa026205mg	PREDICTED: uncharacterized protein LOC103435923
Pav_sc0001580.1_g490.1.mk	Pav_sc0001580.1	0	0	0	338	257	384	0	0	0	3.14725	2.98873	3.17215	0	3.10271	300.91	0	Inf	8.3868e-84	8.3439e-81	UP	GO:0044249//GO:1901576//GO:0031323//GO:0050794//GO:0010467//GO:0010468//GO:0051252//GO:0044271//GO:0006139//GO:0031326//GO:1903506//GO:0046483//GO:0044238//GO:0008150//GO:0034654//GO:0034645//GO:0044260//GO:0065007//GO:0008152//GO:0051171//GO:1901360//GO:0080090//GO:0032774//GO:0071704//GO:0016070//GO:0097659//GO:0050789//GO:0006351//GO:0009058//GO:0060255//GO:0010556//GO:0009059//GO:0018130//GO:…	cellular biosynthetic process//organic substance biosynthetic process//regulation of cellular metabolic process//regulation of cellular process//gene expression//regulation of gene expression//regulation of RNA metabolic process//cellular nitrogen compound biosynthetic process//nucleobase-containing compound metabolic process//regulation of cellular biosynthetic process//regulation of nucleic aci…	--	--	GO:0036094//GO:0032553//GO:0043168//GO:0000166//GO:0003700//GO:0043531//GO:0001882//GO:0001071//GO:0030554//GO:0003674//GO:0032559//GO:0097367//GO:0005488//GO:0005515//GO:0017076//GO:0097159//GO:0032555//GO:0043167//GO:1901265//GO:0001883//GO:0032550//GO:0032549//GO:1901363	small molecule binding//ribonucleotide binding//anion binding//nucleotide binding//transcription factor activity, sequence-specific DNA binding//ADP binding//nucleoside binding//nucleic acid binding transcription factor activity//adenyl nucleotide binding//molecular_function//adenyl ribonucleotide binding//carbohydrate derivative binding//binding//protein binding//purine nucleotide binding//organ…	no KO assigned | (RefSeq) hypothetical protein	http://www.genome.jp/dbget-bin/www_bget?pper:PRUPE_ppa000457mg	Disease resistance protein RPM1
Pav_sc0001015.1_g210.1.br	Pav_sc0001015.1	0	0	0	293	288	317	0	0	0	25.2089	30.9469	24.1966	0	26.7841	281.475	0	Inf	2.7892e-72	2.2378e-69	UP	--	--	--	--	--	--	--	--	-\-
Pav_sc0000412.1_g370.1.mk	Pav_sc0000412.1	0	0	0	310	209	266	0	0	0	3.96336	3.33724	3.01711	0	3.43924	242.887	0	Inf	3.961e-72	3.0787e-69	UP	GO:0065007//GO:0050896//GO:0051716//GO:0008150//GO:0023052//GO:0050794//GO:0044700//GO:0044699//GO:0007154//GO:0009987//GO:0044763//GO:0050789//GO:0007165	biological regulation//response to stimulus//cellular response to stimulus//biological_process//signaling//regulation of cellular process//single organism signaling//single-organism process//cell communication//cellular process//single-organism cellular process//regulation of biological process//signal transduction	--	--	GO:0097367//GO:0032559//GO:0005488//GO:0005515//GO:0030554//GO:0003674//GO:0001882//GO:0043531//GO:0036094//GO:0032553//GO:0043168//GO:0000166//GO:0032550//GO:0032549//GO:1901363//GO:0043167//GO:0001883//GO:1901265//GO:0097159//GO:0017076//GO:0032555	carbohydrate derivative binding//adenyl ribonucleotide binding//binding//protein binding//adenyl nucleotide binding//molecular_function//nucleoside binding//ADP binding//small molecule binding//ribonucleotide binding//anion binding//nucleotide binding//purine ribonucleoside binding//ribonucleoside binding//heterocyclic compound binding//ion binding//purine nucleoside binding//nucleoside phosphate…	no KO assigned | (RefSeq) hypothetical protein	http://www.genome.jp/dbget-bin/www_bget?pper:PRUPE_ppa026840mg	PREDICTED: TMV resistance protein N-like
Pav_sc0001898.1_g010.1.br	Pav_sc0001898.1	0	0	0	229	199	329	0	0	0	5.86385	6.36413	7.47397	0	6.56731	231.654	0	Inf	4.7119e-70	3.4469e-67	UP	--	--	--	--	GO:0003887//GO:0003674//GO:0016779//GO:0016772//GO:0005515//GO:0005488//GO:0034061//GO:0003824//GO:0016740	DNA-directed DNA polymerase activity//molecular_function//nucleotidyltransferase activity//transferase activity, transferring phosphorus-containing groups//protein binding//binding//DNA polymerase activity//catalytic activity//transferase activity	no KO assigned | (RefSeq) hypothetical protein	http://www.genome.jp/dbget-bin/www_bget?pper:PRUPE_ppa001834mg	PREDICTED: probable LRR receptor-like serine/threonine-protein kinase RFK1 isoform X2
Pav_sc0004298.1_g110.1.mk	Pav_sc0004298.1	0	0	0	295	198	248	0	0	0	37.6413	31.5534	28.0739	0	32.4229	229.432	0	Inf	3.0392e-69	2.043e-66	UP	--	--	--	--	--	--	--	--	-\-
Pav_sc0005603.1_g090.1.br	Pav_sc0005603.1	0	0	0	228	157	202	0	0	0	36.9128	31.7453	29.0136	0	32.5572	181.582	0	Inf	2.4905e-58	1.1061e-55	UP	GO:0044237//GO:0009987//GO:1901293//GO:0006793//GO:0034641//GO:0006807//GO:0009152//GO:1901564//GO:0006753//GO:0072522//GO:0006725//GO:0019438//GO:1901362//GO:0018130//GO:0046040//GO:0044763//GO:0009150//GO:0009260//GO:0009117//GO:0009058//GO:0044281//GO:0072521//GO:0009156//GO:0042221//GO:0071704//GO:0044710//GO:0009127//GO:0009725//GO:1901360//GO:0009161//GO:0009168//GO:0008152//GO:0044711//GO:…	cellular metabolic process//cellular process//nucleoside phosphate biosynthetic process//phosphorus metabolic process//cellular nitrogen compound metabolic process//nitrogen compound metabolic process//purine ribonucleotide biosynthetic process//organonitrogen compound metabolic process//nucleoside phosphate metabolic process//purine-containing compound biosynthetic process//cellular aromatic com…	--	--	GO:1901363//GO:0032549//GO:0032550//GO:0043169//GO:1901265//GO:0001883//GO:0043167//GO:0032555//GO:0097159//GO:0017076//GO:0046872//GO:0005488//GO:0032559//GO:0097367//GO:0003674//GO:0035639//GO:0030554//GO:0016879//GO:0001882//GO:0003824//GO:0005524//GO:0000166//GO:0000287//GO:0016874//GO:0043168//GO:0032553//GO:0036094	heterocyclic compound binding//ribonucleoside binding//purine ribonucleoside binding//cation binding//nucleoside phosphate binding//purine nucleoside binding//ion binding//purine ribonucleotide binding//organic cyclic compound binding//purine nucleotide binding//metal ion binding//binding//adenyl ribonucleotide binding//carbohydrate derivative binding//molecular_function//purine ribonucleoside tr…	K14488 SAUR family protein | (RefSeq) hypothetical protein	http://www.genome.jp/dbget-bin/www_bget?pper:PRUPE_ppa019112mg	PREDICTED: auxin-induced protein 15A-like
Pav_sc0001305.1_g210.1.br	Pav_sc0001305.1	0	0	0	207	165	211	0	0	0	43.2875	43.0938	39.1456	0	41.8423	180.756	0	Inf	4.4869e-58	1.9579e-55	UP	--	--	--	--	--	--	no KO assigned | (RefSeq) hypothetical protein	http://www.genome.jp/dbget-bin/www_bget?pper:PRUPE_ppa014970mg	-\-
Pav_sc0002862.1_g270.1.mk	Pav_sc0002862.1	0	0	0	198	136	169	0	0	0	6.61996	5.67895	5.01286	0	5.77059	155.852	0	Inf	7.3131e-52	2.6749e-49	UP	--	--	--	--	--	--	--	--	PREDICTED: uncharacterized protein LOC103337299
Pav_sc0006480.1_g020.1.br	Pav_sc0006480.1	0	0	0	184	142	174	0	0	0	30.4439	29.3434	25.5411	0	28.4428	155.289	0	Inf	1.1532e-51	4.1567e-49	UP	GO:0009725//GO:0042221//GO:0008150//GO:0009719//GO:0050896//GO:0009733//GO:0010033	response to hormone//response to chemical//biological_process//response to endogenous stimulus//response to stimulus//response to auxin//response to organic substance	--	--	--	--	K14488 SAUR family protein | (RefSeq) hypothetical protein	http://www.genome.jp/dbget-bin/www_bget?pper:PRUPE_ppa019112mg	PREDICTED: auxin-induced protein 15A-like
Pav_sc0002056.1_g070.1.br	Pav_sc0002056.1	0	0	0	205	113	180	0	0	0	30.2606	20.8325	23.5725	0	24.8885	152.103	0	Inf	2.4156e-44	6.6756e-42	UP	GO:0009725//GO:0042221//GO:0050896//GO:0009719//GO:0008150//GO:0010033//GO:0009733	response to hormone//response to chemical//response to stimulus//response to endogenous stimulus//biological_process//response to organic substance//response to auxin	--	--	--	--	K14488 SAUR family protein | (RefSeq) hypothetical protein	http://www.genome.jp/dbget-bin/www_bget?pper:PRUPE_ppa015749mg	PREDICTED: auxin-induced protein 15A-like
Pav_sc0011182.1_g010.1.mk	Pav_sc0011182.1	0	0	0	173	122	199	0	0	0	4.27948	3.76915	4.36723	0	4.13862	151.033	0	Inf	6.6878e-51	2.3428e-48	UP	--	--	--	--	--	--	no KO assigned | (RefSeq) hypothetical protein	http://www.genome.jp/dbget-bin/www_bget?pper:PRUPE_ppa004270mg	PREDICTED: LOW QUALITY PROTEIN: probable zinc metalloprotease EGY2, chloroplastic
Pav_sc0001838.1_g060.1.mk	Pav_sc0001838.1	0	0	0	260	93	128	0	0	0	12.1827	5.4424	5.32092	0	7.64866	147.071	0	Inf	1.0591e-10	3.2203e-09	UP	--	--	--	--	--	--	--	--	PREDICTED: uncharacterized protein LOC103320037
Pav_sc0003155.1_g100.1.mk	Pav_sc0003155.1	0	0	0	144	144	157	0	0	0	11.5943	14.4805	11.2148	0	12.4299	139.592	0	Inf	2.5581e-47	7.9531e-45	UP	--	--	--	--	--	--	--	--	-\-
Pav_sc0000103.1_g1380.1.mk	Pav_sc0000103.1	0	0	0	164	127	158	0	0	0	1.81297	1.75344	1.54957	0	1.70533	139.35	0	Inf	1.7889e-47	5.7785e-45	UP	GO:0044699//GO:0071704//GO:0006260//GO:1901360//GO:0044249//GO:1901576//GO:0046483//GO:0044763//GO:0044238//GO:0009059//GO:0009058//GO:0006139//GO:0006928//GO:0034645//GO:0007017//GO:0006259//GO:0006725//GO:0043170//GO:0008150//GO:0008152//GO:0009987//GO:0044237//GO:0006807//GO:0034641//GO:0044260//GO:0007018//GO:0090304	single-organism process//organic substance metabolic process//DNA replication//organic cyclic compound metabolic process//cellular biosynthetic process//organic substance biosynthetic process//heterocycle metabolic process//single-organism cellular process//primary metabolic process//macromolecule biosynthetic process//biosynthetic process//nucleobase-containing compound metabolic process//moveme…	--	--	GO:0008092//GO:0003824//GO:0034061//GO:0016740//GO:0000166//GO:0005524//GO:0016817//GO:0032553//GO:0032555//GO:0043168//GO:0016787//GO:0003677//GO:0097159//GO:0036094//GO:0017076//GO:0003676//GO:0017111//GO:0043167//GO:1901265//GO:0001883//GO:0001882//GO:0016462//GO:0015631//GO:0016818//GO:0003774//GO:0016779//GO:0003674//GO:0035639//GO:0003777//GO:0016772//GO:0030554//GO:0003887//GO:0005515//GO:…	cytoskeletal protein binding//catalytic activity//DNA polymerase activity//transferase activity//nucleotide binding//ATP binding//hydrolase activity, acting on acid anhydrides//ribonucleotide binding//purine ribonucleotide binding//anion binding//hydrolase activity//DNA binding//organic cyclic compound binding//small molecule binding//purine nucleotide binding//nucleic acid binding//nucleoside-tr…	K02325 DNA polymerase epsilon subunit 2 [EC:2.7.7.7] | (RefSeq) hypothetical protein	http://www.genome.jp/dbget-bin/www_bget?pper:PRUPE_ppa004061mg	PREDICTED: DNA polymerase epsilon subunit 2 isoform X1
Pav_sc0004043.1_g010.1.mk	Pav_sc0004043.1	0	0	0	170	94	161	0	0	0	6.16773	4.25935	5.18215	0	5.20308	129.365	0	Inf	3.987e-45	1.1666e-42	UP	GO:0005975//GO:0044238//GO:0008150//GO:0008152//GO:0071704	carbohydrate metabolic process//primary metabolic process//biological_process//metabolic process//organic substance metabolic process	GO:0019013//GO:0019012//GO:0019028//GO:0044423//GO:0005575	viral nucleocapsid//virion//viral capsid//virion part//cellular_component	GO:0003824//GO:0016787//GO:0003674//GO:0016798//GO:0004553	catalytic activity//hydrolase activity//molecular_function//hydrolase activity, acting on glycosyl bonds//hydrolase activity, hydrolyzing O-glycosyl compounds	K01183 chitinase [EC:3.2.1.14] | (RefSeq) hypothetical protein	http://www.genome.jp/dbget-bin/www_bget?pper:PRUPE_ppa018340mg	PREDICTED: chitotriosidase-1-like
Pav_sc0011993.1_g010.1.mk	Pav_sc0011993.1	0	0	0	159	118	135	0	0	0	9.30306	8.62282	7.00762	0	8.31116	128.313	0	Inf	2.1952e-44	6.1347e-42	UP	GO:0051641//GO:0046907//GO:0071702//GO:0051649//GO:0006886//GO:0015031//GO:0070727//GO:0051179//GO:0016192//GO:0006810//GO:0033036//GO:0008150//GO:0034613//GO:0051234//GO:0008104//GO:0045184	cellular localization//intracellular transport//organic substance transport//establishment of localization in cell//intracellular protein transport//protein transport//cellular macromolecule localization//localization//vesicle-mediated transport//transport//macromolecule localization//biological_process//cellular protein localization//establishment of localization//protein localization//establish…	GO:0016020//GO:0005622//GO:0005575//GO:0044425//GO:0044424//GO:0030117//GO:0032991//GO:0044444//GO:0048475//GO:0098796//GO:0044464//GO:0005737//GO:0043234//GO:0005623	membrane//intracellular//cellular_component//membrane part//intracellular part//membrane coat//macromolecular complex//cytoplasmic part//coated membrane//membrane protein complex//cell part//cytoplasm//protein complex//cell	--	--	no KO assigned | (RefSeq) hypothetical protein	http://www.genome.jp/dbget-bin/www_bget?pper:PRUPE_ppa003737mg	PREDICTED: apoptosis inhibitor 5
Novel00845	Pav_sc0002625.1	0	0	0	123	104	162	0	0	0	5.54477	5.85531	6.4789	0	5.95966	119.413	0	Inf	3.7559e-42	9.3416e-40	UP	GO:0051179//GO:0051234//GO:0006810//GO:0008150	localization//establishment of localization//transport//biological_process	GO:0044425//GO:0005575//GO:0016021//GO:0016020//GO:0031224	membrane part//cellular_component//integral component of membrane//membrane//intrinsic component of membrane	--	--	no KO assigned | (RefSeq) hypothetical protein	http://www.genome.jp/dbget-bin/www_bget?pper:PRUPE_ppa016183mg	--
Pav_sc0000040.1_g1010.1.mk	Pav_sc0000040.1	0	0	0	114	113	145	0	0	0	8.00829	9.91407	9.03672	0	8.98636	115.636	0	Inf	7.7429e-41	1.8168e-38	UP	GO:0016567//GO:0043412//GO:0044238//GO:0008150//GO:0070647//GO:0008152//GO:0006464//GO:0044260//GO:0044267//GO:0036211//GO:0071704//GO:0032446//GO:0019538//GO:0043170//GO:0044237//GO:0009987	protein ubiquitination//macromolecule modification//primary metabolic process//biological_process//protein modification by small protein conjugation or removal//metabolic process//cellular protein modification process//cellular macromolecule metabolic process//cellular protein metabolic process//protein modification process//organic substance metabolic process//protein modification by small prote…	--	--	GO:0003824//GO:0016740//GO:0003674//GO:0019787//GO:0004842	catalytic activity//transferase activity//molecular_function//ubiquitin-like protein transferase activity//ubiquitin-protein transferase activity	K10597 ubiquitin conjugation factor E4 B [EC:2.3.2.27] | (RefSeq) hypothetical protein	http://www.genome.jp/dbget-bin/www_bget?pper:PRUPE_ppa000705mg	PREDICTED: LOW QUALITY PROTEIN: probable ubiquitin conjugation factor E4
Pav_sc0004298.1_g150.1.mk	Pav_sc0004298.1	0	0	0	158	72	145	0	0	0	4.06655	2.31441	3.31089	0	3.23061	113.147	0	Inf	2.1534e-25	2.2041e-23	UP	GO:0007154//GO:0009987//GO:0044763//GO:0050789//GO:0007165//GO:0050896//GO:0065007//GO:0051716//GO:0008150//GO:0023052//GO:0050794//GO:0044700//GO:0044699	cell communication//cellular process//single-organism cellular process//regulation of biological process//signal transduction//response to stimulus//biological regulation//cellular response to stimulus//biological_process//signaling//regulation of cellular process//single organism signaling//single-organism process	GO:0005575//GO:0016020	cellular_component//membrane	GO:0032550//GO:0032549//GO:1901363//GO:0016887//GO:0003723//GO:0043167//GO:0001883//GO:1901265//GO:0017111//GO:0004386//GO:0017076//GO:0097159//GO:0032555//GO:0016817//GO:0097367//GO:0032559//GO:0005488//GO:0005515//GO:0003724//GO:0030554//GO:0035639//GO:0003674//GO:0016818//GO:0043531//GO:0001882//GO:0016462//GO:0003676//GO:0016787//GO:0036094//GO:0032553//GO:0043168//GO:0000166//GO:0005524//GO:…	purine ribonucleoside binding//ribonucleoside binding//heterocyclic compound binding//ATPase activity//RNA binding//ion binding//purine nucleoside binding//nucleoside phosphate binding//nucleoside-triphosphatase activity//helicase activity//purine nucleotide binding//organic cyclic compound binding//purine ribonucleotide binding//hydrolase activity, acting on acid anhydrides//carbohydrate derivat…	no KO assigned | (RefSeq) hypothetical protein	http://www.genome.jp/dbget-bin/www_bget?pper:PRUPE_ppa017503mg	PREDICTED: TMV resistance protein N-like
Pav_sc0002173.1_g020.1.mk	Pav_sc0002173.1	0	0	0	122	89	131	0	0	0	2.03121	1.85065	1.93497	0	1.93895	105.157	0	Inf	5.8509e-38	1.1831e-35	UP	--	--	--	--	--	--	K14834 nucleolar complex protein 3 | (RefSeq) hypothetical protein	http://www.genome.jp/dbget-bin/www_bget?pper:PRUPE_ppa016725mg	PREDICTED: nucleolar complex protein 3 homolog
Pav_sc0006715.1_g010.1.br	Pav_sc0006715.1	0	0	0	103	78	146	0	0	0	2.94273	2.78322	3.70062	0	3.14219	99.2833	0	Inf	2.1297e-36	3.9236e-34	UP	--	--	--	--	--	--	no KO assigned | (RefSeq) hypothetical protein	http://www.genome.jp/dbget-bin/www_bget?pper:PRUPE_ppb014339mg	PREDICTED: uncharacterized protein LOC103420839
Novel00564	Pav_sc0000983.1	0	0	0	109	79	131	0	0	0	7.13548	6.45896	7.6081	0	7.06751	97.4665	0	Inf	9.6536e-36	1.7029e-33	UP	--	--	--	--	--	--	--	--	--
Pav_sc0001686.1_g020.1.br	Pav_sc0001686.1	0	0	0	109	66	95	0	0	0	16.2491	12.2881	12.5642	0	13.7005	82.9406	0	Inf	4.0091e-31	5.9353e-29	UP	--	--	--	--	--	--	--	--	-\-
Pav_sc0001126.1_g230.1.br	Pav_sc0001126.1	0	0	1	214	121	176	0	0	0.0640461	10.8124	7.63541	7.88913	0.0213487	8.77898	156.773	0.385678	8.6671	6.5745e-41	1.5574e-38	UP	GO:0008152//GO:0008150	metabolic process//biological_process	--	--	GO:0003824//GO:0016758//GO:0016740//GO:0003674//GO:0016757	catalytic activity//transferase activity, transferring hexosyl groups//transferase activity//molecular_function//transferase activity, transferring glycosyl groups	no KO assigned | (RefSeq) hypothetical protein	http://www.genome.jp/dbget-bin/www_bget?pper:PRUPE_ppa019699mg	PREDICTED: scopoletin glucosyltransferase-like
Pav_sc0001350.1_g010.1.br	Pav_sc0001350.1	0	0	0	86	81	88	0	0	0	3.23715	3.80792	2.9387	0	3.32792	79.9299	0	Inf	7.0108e-30	9.7962e-28	UP	--	--	--	--	--	--	no KO assigned | (RefSeq) hypothetical protein	http://www.genome.jp/dbget-bin/www_bget?pper:PRUPEppa1027154mg	TNP2
Pav_sc0012250.1_g010.1.br	Pav_sc0012250.1	0	0	0	102	70	84	0	0	0	8.53203	7.31288	6.23361	0	7.35951	79.4504	0	Inf	7.2976e-30	1.014e-27	UP	--	--	--	--	--	--	--	--	-\-
Novel00688	Pav_sc0001412.1	0	0	0	90	75	83	0	0	0	2.19033	2.27965	1.79207	0	2.08735	77.5081	0	Inf	3.8275e-29	5.0104e-27	UP	--	--	--	--	--	--	--	--	--
Novel00231	Pav_sc0000317.1	0	0	0	94	66	90	0	0	0	6.22572	5.45939	5.28825	0	5.65778	77.1341	0	Inf	3.3997e-29	4.4739e-27	UP	--	--	--	--	--	--	--	--	--
Pav_sc0001412.1_g380.1.mk	Pav_sc0001412.1	0	0	0	72	76	99	0	0	0	6.45279	8.50683	7.87152	0	7.61038	76.7713	0	Inf	5.5877e-29	7.2384e-27	UP	--	--	--	--	GO:0032550//GO:0032549//GO:1901363//GO:0016887//GO:0043167//GO:0001883//GO:1901265//GO:0017111//GO:0032555//GO:0017076//GO:0097159//GO:0016817//GO:0097367//GO:0032559//GO:0005488//GO:0035639//GO:0003674//GO:0030554//GO:0001882//GO:0016462//GO:0016818//GO:0032553//GO:0043168//GO:0016787//GO:0036094//GO:0003824//GO:0000166//GO:0005524	purine ribonucleoside binding//ribonucleoside binding//heterocyclic compound binding//ATPase activity//ion binding//purine nucleoside binding//nucleoside phosphate binding//nucleoside-triphosphatase activity//purine ribonucleotide binding//purine nucleotide binding//organic cyclic compound binding//hydrolase activity, acting on acid anhydrides//carbohydrate derivative binding//adenyl ribonucleoti…	no KO assigned | (RefSeq) hypothetical protein	http://www.genome.jp/dbget-bin/www_bget?pper:PRUPEppa017819m1g	PREDICTED: ABC transporter C family member 3-like
Pav_sc0000744.1_g330.1.mk	Pav_sc0000744.1	0	0	0	109	79	49	0	0	0	2.58586	2.34069	1.0313	0	1.98595	75.662	0	Inf	1.2243e-11	4.1771e-10	UP	GO:0044765//GO:0051234//GO:0044699//GO:0008150//GO:0006810//GO:0051179//GO:0044763//GO:0055085//GO:0009987//GO:1902578	single-organism transport//establishment of localization//single-organism process//biological_process//transport//localization//single-organism cellular process//transmembrane transport//cellular process//single-organism localization	GO:0031224//GO:0044425//GO:0016021//GO:0005575//GO:0016020	intrinsic component of membrane//membrane part//integral component of membrane//cellular_component//membrane	--	--	K13947 auxin efflux carrier family | (RefSeq) hypothetical protein	http://www.genome.jp/dbget-bin/www_bget?pper:PRUPE_ppa007621mg	PREDICTED: putative auxin efflux carrier component 8
Pav_sc0000405.1_g690.1.br	Pav_sc0000405.1	0	1	0	149	124	201	0	0.0168337	0	2.49546	2.59373	2.98654	0.00561122	2.69191	145.164	0.336845	8.7514	1.2688e-47	4.2077e-45	UP	GO:0044238//GO:0048544//GO:0044763//GO:0009856//GO:0044706//GO:0032501//GO:0006796//GO:0008037//GO:0022414//GO:0016310//GO:0044699//GO:0036211//GO:0071704//GO:0043412//GO:0008152//GO:0009987//GO:0044237//GO:0006793//GO:0007154//GO:0006464//GO:0051704//GO:0006468//GO:0044260//GO:0044267//GO:0009875//GO:0043170//GO:0019538//GO:0044703//GO:0008150	primary metabolic process//recognition of pollen//single-organism cellular process//pollination//multi-multicellular organism process//multicellular organismal process//phosphate-containing compound metabolic process//cell recognition//reproductive process//phosphorylation//single-organism process//protein modification process//organic substance metabolic process//macromolecule modification//meta…	--	--	GO:0001882//GO:0043167//GO:0001883//GO:1901265//GO:0016773//GO:0003824//GO:0004672//GO:0000166//GO:0005524//GO:0016740//GO:0032555//GO:0043168//GO:0032553//GO:0097159//GO:0036094//GO:0017076//GO:1901363//GO:0032549//GO:0005488//GO:0016301//GO:0097367//GO:0032559//GO:0032550//GO:0003674//GO:0035639//GO:0030554//GO:0016772	nucleoside binding//ion binding//purine nucleoside binding//nucleoside phosphate binding//phosphotransferase activity, alcohol group as acceptor//catalytic activity//protein kinase activity//nucleotide binding//ATP binding//transferase activity//purine ribonucleotide binding//anion binding//ribonucleotide binding//organic cyclic compound binding//small molecule binding//purine nucleotide binding/…	no KO assigned | (RefSeq) hypothetical protein	http://www.genome.jp/dbget-bin/www_bget?pper:PRUPE_ppa025712mg	PREDICTED: receptor-like serine/threonine-protein kinase SD1-7 isoform X2
Pav_sc0001801.1_g020.1.br	Pav_sc0001801.1	0	0	0	86	50	85	0	0	0	7.52826	5.46644	6.6012	0	6.53197	67.3206	0	Inf	4.093e-26	4.388e-24	UP	--	--	--	--	--	--	K16302 metal transporter CNNM | (RefSeq) hypothetical protein	http://www.genome.jp/dbget-bin/www_bget?pper:PRUPE_ppa005128mg	PREDICTED: DUF21 domain-containing protein At4g14240-like
Pav_sc0003738.1_g090.1.mk	Pav_sc0003738.1	0	0	0	67	61	85	0	0	0	1.82201	2.07178	2.0507	0	1.9815	65.8411	0	Inf	1.9237e-25	1.9853e-23	UP	GO:0008150//GO:0006950//GO:0050896//GO:0006952	biological_process//response to stress//response to stimulus//defense response	GO:0031224//GO:0044425//GO:0016020//GO:0005575//GO:0016021	intrinsic component of membrane//membrane part//membrane//cellular_component//integral component of membrane	--	--	K08472 mlo protein | (RefSeq) hypothetical protein	http://www.genome.jp/dbget-bin/www_bget?pper:PRUPE_ppa004012mg	PREDICTED: MLO-like protein 1
Pav_sc0001279.1_g080.1.br	Pav_sc0001279.1	0	0	0	62	58	59	0	0	0	2.14106	2.50152	1.80758	0	2.15006	56.2921	0	Inf	5.2944e-22	4.5565e-20	UP	--	--	--	--	--	--	no KO assigned | (RefSeq) hypothetical protein	http://www.genome.jp/dbget-bin/www_bget?pper:PRUPE_ppa022177mg	PREDICTED: uncharacterized abhydrolase domain-containing protein DDB_G0269086-like
Pav_sc0002056.1_g010.1.br	Pav_sc0002056.1	1	0	0	114	98	132	0.249884	0	0	27.2451	29.2515	27.9876	0.0832946	28.1614	106.464	0.338706	8.2961	1.192e-36	2.2631e-34	UP	--	--	--	--	--	--	K20032 palmitoyltransferase ZDHHC13/17 [EC:2.3.1.225] | (RefSeq) hypothetical protein	http://www.genome.jp/dbget-bin/www_bget?pper:PRUPE_ppa003909mg	PREDICTED: probable protein S-acyltransferase 23 isoform X2
Novel00288	Pav_sc0000400.1	0	0	0	129	15	33	0	0	0	2.55901	0.371632	0.580771	0	1.17047	52.9917	0	Inf	0.0027781	0.015855	UP	GO:0043170//GO:0006725//GO:0009987//GO:0044237//GO:0034641//GO:0006807//GO:0090304//GO:0071704//GO:0015074//GO:1901360//GO:0006259//GO:0008150//GO:0008152//GO:0044260//GO:0044238//GO:0046483//GO:0006139	macromolecule metabolic process//cellular aromatic compound metabolic process//cellular process//cellular metabolic process//cellular nitrogen compound metabolic process//nitrogen compound metabolic process//nucleic acid metabolic process//organic substance metabolic process//DNA integration//organic cyclic compound metabolic process//DNA metabolic process//biological_process//metabolic process//…	--	--	--	--	no KO assigned | (RefSeq) hypothetical protein	http://www.genome.jp/dbget-bin/www_bget?pper:PRUPE_ppa008077mg	--
Pav_sc0000105.1_g060.1.br	Pav_sc0000105.1	0	0	0	63	38	70	0	0	0	3.15136	2.374	3.10645	0	2.87727	51.8952	0	Inf	8.0323e-21	6.2431e-19	UP	--	--	--	--	--	--	--	--	-\-
Pav_sc0005566.1_g010.1.br	Pav_sc0005566.1	0	1	1	196	165	220	0	0.0165937	0.0209274	3.23583	3.40214	3.22226	0.012507	3.28674	179.866	0.722524	7.9597	1.0888e-54	4.2312e-52	UP	GO:0048869//GO:0048856//GO:0032502//GO:0008150//GO:0032989//GO:0016043//GO:0044767//GO:0044699//GO:0000902//GO:0009987//GO:0009653//GO:0071840//GO:0044763	cellular developmental process//anatomical structure development//developmental process//biological_process//cellular component morphogenesis//cellular component organization//single-organism developmental process//single-organism process//cell morphogenesis//cellular process//anatomical structure morphogenesis//cellular component organization or biogenesis//single-organism cellular process	--	--	--	--	no KO assigned | (RefSeq) hypothetical protein	http://www.genome.jp/dbget-bin/www_bget?pper:PRUPE_ppa022115mg	PREDICTED: putative ribonuclease H protein At1g65750
Pav_sc0003151.1_g050.1.mk	Pav_sc0003151.1	0	0	0	46	47	64	0	0	0	4.00347	5.10875	4.94159	0	4.6846	48.6551	0	Inf	1.7951e-19	1.2542e-17	UP	GO:0009607//GO:0008150//GO:0006950//GO:0050896//GO:0006952	response to biotic stimulus//biological_process//response to stress//response to stimulus//defense response	GO:0016020//GO:0005575	membrane//cellular_component	--	--	no KO assigned | (RefSeq) hypothetical protein	http://www.genome.jp/dbget-bin/www_bget?pper:PRUPE_ppa019915mg	PREDICTED: disease resistance protein RPP8-like
Pav_sc0000130.1_g470.1.mk	Pav_sc0000130.1	0	0	0	45	51	58	0	0	0	3.45685	4.89302	3.9528	0	4.10089	48.2852	0	Inf	3.1031e-19	2.1321e-17	UP	--	--	--	--	--	--	--	--	-\-
Pav_sc0000661.1_g040.1.mk	Pav_sc0000661.1	0	0	0	43	54	54	0	0	0	1.76251	2.76437	1.96366	0	2.16352	47.7677	0	Inf	5.6938e-19	3.8172e-17	UP	GO:0009405//GO:0051704//GO:0008150	pathogenesis//multi-organism process//biological_process	GO:0005575//GO:0005576	cellular_component//extracellular region	GO:0043167//GO:1901265//GO:0001883//GO:0017076//GO:0097159//GO:0032555//GO:0042578//GO:0032549//GO:1901363//GO:0032550//GO:0016772//GO:0001882//GO:0016740//GO:0000166//GO:0005524//GO:0003824//GO:0016787//GO:0036094//GO:0032553//GO:0043168//GO:0005488//GO:0098519//GO:0032559//GO:0097367//GO:0016301//GO:0030554//GO:0016788//GO:0035639//GO:0003674//GO:0016791	ion binding//nucleoside phosphate binding//purine nucleoside binding//purine nucleotide binding//organic cyclic compound binding//purine ribonucleotide binding//phosphoric ester hydrolase activity//ribonucleoside binding//heterocyclic compound binding//purine ribonucleoside binding//transferase activity, transferring phosphorus-containing groups//nucleoside binding//transferase activity//nucleoti…	K13800 UMP-CMP kinase [EC:2.7.4.- 2.7.4.14] | (RefSeq) hypothetical protein	http://www.genome.jp/dbget-bin/www_bget?pper:PRUPE_ppa018733mg	PREDICTED: UMP-CMP kinase 3-like
Novel00232	Pav_sc0000317.1	0	0	0	53	49	48	0	0	0	2.35861	2.72342	1.89509	0	2.3257	47.2518	0	Inf	7.9509e-19	5.3017e-17	UP	--	--	--	--	--	--	--	--	--
Pav_sc0003880.1_g010.1.br	Pav_sc0003880.1	0	0	0	59	37	51	0	0	0	17.7667	13.9154	13.6249	0	15.1023	45.2681	0	Inf	2.58e-18	1.6667e-16	UP	--	--	--	--	--	--	--	--	-\-
Novel00472	Pav_sc0000755.1	0	1	0	89	91	91	0	0.106574	0	9.43683	12.0508	8.56023	0.0355246	10.016	85.4331	0.336845	7.9866	4.9653e-30	6.9772e-28	UP	GO:0007346//GO:0009987//GO:0010564//GO:0000910//GO:0022607//GO:0032955//GO:0061640//GO:0007049//GO:0032465//GO:0000281//GO:0071840//GO:0044763//GO:1903436//GO:0051301//GO:0051726//GO:0000917//GO:0032506//GO:0050789//GO:1901891//GO:1903047//GO:1902412//GO:0051128//GO:0065007//GO:0000278//GO:1902410//GO:0008150//GO:0044087//GO:0090529//GO:0032954//GO:0051302//GO:0016043//GO:0044085//GO:0044699//GO:…	regulation of mitotic cell cycle//cellular process//regulation of cell cycle process//cytokinesis//cellular component assembly//regulation of barrier septum assembly//cytoskeleton-dependent cytokinesis//cell cycle//regulation of cytokinesis//mitotic cytokinesis//cellular component organization or biogenesis//single-organism cellular process//regulation of mitotic cytokinetic process//cell divisio…	--	--	--	--	no KO assigned | (RefSeq) hypothetical protein	http://www.genome.jp/dbget-bin/www_bget?pper:PRUPE_ppa010520mg	--
Pav_sc0000691.1_g790.1.br	Pav_sc0000691.1	0	0	0	53	34	56	0	0	0	1.62194	1.2995	1.52039	0	1.48061	43.6638	0	Inf	8.3457e-18	5.2286e-16	UP	GO:0008150//GO:0008152	biological_process//metabolic process	GO:0016020//GO:0005575//GO:0044464//GO:0005886//GO:0005623//GO:0071944	membrane//cellular_component//cell part//plasma membrane//cell//cell periphery	GO:0003674//GO:0016740//GO:0003824//GO:0016758//GO:0016757	molecular_function//transferase activity//catalytic activity//transferase activity, transferring hexosyl groups//transferase activity, transferring glycosyl groups	K21374 7-deoxyloganetin glucosyltransferase [EC:2.4.1.324] | (RefSeq) hypothetical protein	http://www.genome.jp/dbget-bin/www_bget?pper:PRUPE_ppa004945mg	PREDICTED: UDP-glycosyltransferase 85A2-like
Pav_sc0000934.1_g010.1.br	Pav_sc0000934.1	0	0	0	58	20	57	0	0	0	8.23847	3.54803	7.18293	0	6.32314	40.0878	0	Inf	2.1454e-11	7.1147e-10	UP	--	--	--	--	--	--	K13484 5-hydroxyisourate hydrolase / 2-oxo-4-hydroxy-4-carboxy-5-ureidoimidazoline decarboxylase [EC:3.5.2.17 4.1.1.97] | (RefSeq) hypothetical protein	http://www.genome.jp/dbget-bin/www_bget?pper:PRUPE_ppa008453mg	PREDICTED: uric acid degradation bifunctional protein TTL isoform X2
Pav_sc0003352.1_g080.1.br	Pav_sc0003352.1	0	0	0	29	26	76	0	0	0	0.810091	0.907085	1.88346	0	1.20021	38.7708	0	Inf	4.2482e-08	8.842e-07	UP	--	--	--	--	GO:0003674//GO:0005488//GO:0005515	molecular_function//binding//protein binding	no KO assigned | (RefSeq) hypothetical protein	http://www.genome.jp/dbget-bin/www_bget?pper:PRUPE_ppa020863mg	PREDICTED: receptor-like protein 2
Pav_sc0003828.1_g020.1.br	Pav_sc0003828.1	0	0	0	46	25	55	0	0	0	0.95531	0.648433	1.01334	0	0.872363	37.8796	0	Inf	8.6386e-16	4.5138e-14	UP	GO:0016310//GO:0043412//GO:0044238//GO:0006796//GO:0008150//GO:0008152//GO:0006464//GO:0006468//GO:0044267//GO:0044260//GO:0036211//GO:0071704//GO:0043170//GO:0019538//GO:0009987//GO:0044237//GO:0006793	phosphorylation//macromolecule modification//primary metabolic process//phosphate-containing compound metabolic process//biological_process//metabolic process//cellular protein modification process//protein phosphorylation//cellular protein metabolic process//cellular macromolecule metabolic process//protein modification process//organic substance metabolic process//macromolecule metabolic proces…	--	--	GO:0016773//GO:0003824//GO:0004672//GO:0000166//GO:0005524//GO:0016740//GO:0043168//GO:0032553//GO:0036094//GO:0001882//GO:0035639//GO:0003674//GO:0030554//GO:0005515//GO:0005488//GO:0016301//GO:0097367//GO:0032559//GO:0032555//GO:0017076//GO:0097159//GO:0043167//GO:0001883//GO:1901265//GO:0016772//GO:1901363//GO:0032549//GO:0032550	phosphotransferase activity, alcohol group as acceptor//catalytic activity//protein kinase activity//nucleotide binding//ATP binding//transferase activity//anion binding//ribonucleotide binding//small molecule binding//nucleoside binding//purine ribonucleoside triphosphate binding//molecular_function//adenyl nucleotide binding//protein binding//binding//kinase activity//carbohydrate derivative bi…	no KO assigned | (RefSeq) hypothetical protein	http://www.genome.jp/dbget-bin/www_bget?pper:PRUPE_ppa016624mg	PREDICTED: LRR receptor-like serine/threonine-protein kinase FLS2
Pav_sc0002383.1_g100.1.mk	Pav_sc0002383.1	0	0	0	41	31	51	0	0	0	6.63782	6.26819	7.32521	0	6.74374	37.6097	0	Inf	1.4523e-15	7.417e-14	UP	--	--	--	--	--	--	--	--	-\-
Pav_sc0001686.1_g010.1.br	Pav_sc0001686.1	0	0	0	39	31	51	0	0	0	2.43991	2.42219	2.83065	0	2.56425	37.0128	0	Inf	2.4394e-15	1.2208e-13	UP	--	--	--	--	--	--	no KO assigned | (RefSeq) hypothetical protein	http://www.genome.jp/dbget-bin/www_bget?pper:PRUPE_ppa025060mg	PREDICTED: zinc finger MYM-type protein 1-like
Pav_sc0001171.1_g410.1.mk	Pav_sc0001171.1	0	0	0	32	29	58	0	0	0	1.87474	2.12192	3.01458	0	2.33708	36.0229	0	Inf	4.8223e-15	2.3472e-13	UP	--	--	--	--	--	--	K10436 microtubule-associated protein, RP/EB family | (RefSeq) hypothetical protein	http://www.genome.jp/dbget-bin/www_bget?pper:PRUPE_ppa008458mg	-\-
Pav_sc0000130.1_g460.1.mk	Pav_sc0000130.1	0	0	0	36	25	56	0	0	0	6.53054	5.66402	9.01244	0	7.069	35.1609	0	Inf	9.0687e-15	4.3376e-13	UP	GO:0044238//GO:0008150//GO:0008152//GO:0044260//GO:0044267//GO:0071704//GO:0006457//GO:0043170//GO:0019538//GO:0044237//GO:0009987	primary metabolic process//biological_process//metabolic process//cellular macromolecule metabolic process//cellular protein metabolic process//organic substance metabolic process//protein folding//macromolecule metabolic process//protein metabolic process//cellular metabolic process//cellular process	--	--	--	--	K09571 FK506-binding protein 4/5 [EC:5.2.1.8] | (RefSeq) hypothetical protein	http://www.genome.jp/dbget-bin/www_bget?pper:PRUPE_ppa019344mg	PREDICTED: 70 kDa peptidyl-prolyl isomerase-like
Novel00947	Pav_sc0004690.1	0	0	0	41	31	42	0	0	0	1.63456	1.54353	1.4855	0	1.55453	35.2165	0	Inf	1.3406e-14	6.3031e-13	UP	--	--	--	--	GO:0043167//GO:0046872//GO:0043169//GO:0005509//GO:0005488//GO:0003674	ion binding//metal ion binding//cation binding//calcium ion binding//binding//molecular_function	no KO assigned | (RefSeq) hypothetical protein	http://www.genome.jp/dbget-bin/www_bget?pper:PRUPE_ppa005667mg	--
Pav_sc0000418.1_g260.1.mk	Pav_sc0000418.1	0	0	0	34	32	47	0	0	0	1.21308	1.42594	1.48771	0	1.37558	34.8379	0	Inf	1.7995e-14	8.2884e-13	UP	GO:0071704//GO:0043412//GO:0016310//GO:0036211//GO:0006796//GO:0044238//GO:0043170//GO:0019538//GO:0008150//GO:0006464//GO:0006468//GO:0044267//GO:0044260//GO:0008152//GO:0009987//GO:0044237//GO:0006793	organic substance metabolic process//macromolecule modification//phosphorylation//protein modification process//phosphate-containing compound metabolic process//primary metabolic process//macromolecule metabolic process//protein metabolic process//biological_process//cellular protein modification process//protein phosphorylation//cellular protein metabolic process//cellular macromolecule metaboli…	GO:0016020//GO:0005575	membrane//cellular_component	GO:0043168//GO:0032555//GO:0032553//GO:0017076//GO:0036094//GO:0097159//GO:0016773//GO:0003824//GO:0004672//GO:0000166//GO:0005524//GO:0016740//GO:0001882//GO:0043167//GO:0001883//GO:1901265//GO:0035639//GO:0003674//GO:0030554//GO:0016772//GO:0016301//GO:0097367//GO:0032559//GO:0032550//GO:1901363//GO:0032549//GO:0005488	anion binding//purine ribonucleotide binding//ribonucleotide binding//purine nucleotide binding//small molecule binding//organic cyclic compound binding//phosphotransferase activity, alcohol group as acceptor//catalytic activity//protein kinase activity//nucleotide binding//ATP binding//transferase activity//nucleoside binding//ion binding//purine nucleoside binding//nucleoside phosphate binding/…	K04733 interleukin-1 receptor-associated kinase 4 [EC:2.7.11.1] | (RefSeq) hypothetical protein	http://www.genome.jp/dbget-bin/www_bget?pper:PRUPE_ppa026879mg	PREDICTED: LOW QUALITY PROTEIN: putative receptor-like protein kinase At4g00960
Pav_sc0001405.1_g750.1.mk	Pav_sc0001405.1	0	0	0	55	35	18	0	0	0	2.29817	1.82653	0.667269	0	1.59732	34.5373	0	Inf	4.7598e-07	8.1984e-06	UP	--	--	--	--	--	--	no KO assigned | (RefSeq) hypothetical protein	http://www.genome.jp/dbget-bin/www_bget?pper:PRUPE_ppa021829mg	PREDICTED: CEN-like protein 1
Pav_sc0010335.1_g010.1.br	Pav_sc0010335.1	0	0	2	116	106	186	0	0	0.40898	18.7131	21.3566	26.62	0.136327	22.2299	124.468	0.771357	7.3342	2.4922e-40	5.6351e-38	UP	--	--	--	--	GO:0001871//GO:0030247//GO:0003674//GO:0005488//GO:0030246	pattern binding//polysaccharide binding//molecular_function//binding//carbohydrate binding	no KO assigned | (RefSeq) hypothetical protein	http://www.genome.jp/dbget-bin/www_bget?pper:PRUPE_ppa024005mg	PREDICTED: probable receptor-like protein kinase At1g67000
Pav_sc0000091.1_g630.1.br	Pav_sc0000091.1	0	0	0	33	32	46	0	0	0	1.05045	1.27219	1.29906	0	1.20724	34.2735	0	Inf	2.999e-14	1.3537e-12	UP	--	--	--	--	--	--	no KO assigned | (RefSeq) hypothetical protein	http://www.genome.jp/dbget-bin/www_bget?pper:PRUPE_ppa022177mg	PREDICTED: uncharacterized protein LOC103343639
Pav_sc0001422.1_g410.1.mk	Pav_sc0001422.1	0	0	0	50	40	15	0	0	0	2.89178	2.88931	0.769651	0	2.18358	34.1523	0	Inf	2.2761e-06	3.3637e-05	UP	GO:0050896//GO:0006950//GO:0008150	response to stimulus//response to stress//biological_process	--	--	--	--	no KO assigned | (RefSeq) hypothetical protein	http://www.genome.jp/dbget-bin/www_bget?pper:PRUPE_ppb014153mg	PREDICTED: uncharacterized protein LOC103335191 isoform X1
Pav_sc0000890.1_g930.1.mk	Pav_sc0000890.1	0	0	0	57	29	20	0	0	0	1.42247	0.903866	0.442798	0	0.923043	33.3799	0	Inf	5.6035e-07	9.4616e-06	UP	GO:0008152//GO:0055114//GO:0008150//GO:0044699//GO:0044710	metabolic process//oxidation-reduction process//biological_process//single-organism process//single-organism metabolic process	--	--	GO:0005488//GO:0003674//GO:0020037//GO:0003824//GO:1901363//GO:0043169//GO:0046906//GO:0016705//GO:0005506//GO:0043167//GO:0016491//GO:0046914//GO:0097159//GO:0046872	binding//molecular_function//heme binding//catalytic activity//heterocyclic compound binding//cation binding//tetrapyrrole binding//oxidoreductase activity, acting on paired donors, with incorporation or reduction of molecular oxygen//iron ion binding//ion binding//oxidoreductase activity//transition metal ion binding//organic cyclic compound binding//metal ion binding	K04122 ent-kaurene oxidase [EC:1.14.13.78] | (RefSeq) hypothetical protein	http://www.genome.jp/dbget-bin/www_bget?pper:PRUPE_ppa004372mg	PREDICTED: ent-kaurene oxidase, chloroplastic-like
Pav_sc0000103.1_g1420.1.mk	Pav_sc0000103.1	3	2	1	404	305	414	0.0304239	0.0194977	0.0122949	3.91851	3.69469	3.56244	0.0207388	3.72521	346.874	2.07549	7.3848	4.4141e-83	4.0662e-80	UP	GO:1902578//GO:0051179//GO:0006810//GO:0008150//GO:0006811//GO:0044699//GO:0051234//GO:0044765	single-organism localization//localization//transport//biological_process//ion transport//single-organism process//establishment of localization//single-organism transport	GO:0016020//GO:0005575	membrane//cellular_component	GO:0022891//GO:0004112//GO:0005216//GO:0005215//GO:0042578//GO:0008081//GO:0016788//GO:0003674//GO:0015075//GO:0022892//GO:0003824//GO:0022803//GO:0016787//GO:0022857//GO:0022838//GO:0015267	substrate-specific transmembrane transporter activity//cyclic-nucleotide phosphodiesterase activity//ion channel activity//transporter activity//phosphoric ester hydrolase activity//phosphoric diester hydrolase activity//hydrolase activity, acting on ester bonds//molecular_function//ion transmembrane transporter activity//substrate-specific transporter activity//catalytic activity//passive transm…	no KO assigned | (RefSeq) hypothetical protein	http://www.genome.jp/dbget-bin/www_bget?pper:PRUPE_ppa017129mg	PREDICTED: probable GPI-anchored adhesin-like protein PGA55 isoform X1
Novel00329	Pav_sc0000496.1	0	0	0	26	28	46	0	0	0	1.6898	2.27278	2.65233	0	2.20497	30.6602	0	Inf	6.2731e-13	2.4766e-11	UP	GO:0072659//GO:0016043//GO:0044765//GO:1903078//GO:0070201//GO:0032388//GO:0044802//GO:0060341//GO:0032880//GO:0006893//GO:0045184//GO:0051234//GO:0050794//GO:0061024//GO:0042998//GO:0008104//GO:0072657//GO:0044699//GO:0048518//GO:0090150//GO:0032386//GO:0010256//GO:0034613//GO:0065007//GO:0006892//GO:1990778//GO:0051049//GO:0051128//GO:0007009//GO:0008150//GO:1904377//GO:0016192//GO:0006810//GO:…	protein localization to plasma membrane//cellular component organization//single-organism transport//positive regulation of protein localization to plasma membrane//regulation of establishment of protein localization//positive regulation of intracellular transport//single-organism membrane organization//regulation of cellular localization//regulation of protein localization//Golgi to plasma membr…	GO:0005623//GO:0098791//GO:0012505//GO:0005794//GO:0044431//GO:0005737//GO:0044464//GO:0043231//GO:0043229//GO:0005802//GO:0043226//GO:0044444//GO:0044424//GO:0044446//GO:0005622//GO:0005575//GO:0031984//GO:0043227//GO:0044422	cell//Golgi subcompartment//endomembrane system//Golgi apparatus//Golgi apparatus part//cytoplasm//cell part//intracellular membrane-bounded organelle//intracellular organelle//trans-Golgi network//organelle//cytoplasmic part//intracellular part//intracellular organelle part//intracellular//cellular_component//organelle subcompartment//membrane-bounded organelle//organelle part	GO:0005515//GO:0005488//GO:0003674//GO:0071253	protein binding//binding//molecular_function//connexin binding	no KO assigned | (RefSeq) hypothetical protein	http://www.genome.jp/dbget-bin/www_bget?pper:PRUPE_ppa006425mg	--
Pav_sc0000501.1_g130.1.br	Pav_sc0000501.1	0	0	0	33	28	38	0	0	0	0.910009	0.964336	0.929659	0	0.934668	30.6222	0	Inf	7.3409e-13	2.8856e-11	UP	--	--	--	--	--	--	no KO assigned | (RefSeq) hypothetical protein	http://www.genome.jp/dbget-bin/www_bget?pper:PRUPE_ppb015526mg	PREDICTED: uncharacterized protein LOC103337115
Pav_sc0003569.1_g010.1.br	Pav_sc0003569.1	0	0	0	34	21	45	0	0	0	1.59477	1.2302	1.87258	0	1.56585	30.1149	0	Inf	7.8967e-13	3.093e-11	UP	--	--	--	--	--	--	no KO assigned | (RefSeq) hypothetical protein	http://www.genome.jp/dbget-bin/www_bget?pper:PRUPE_ppa009268mg	hypothetical protein
Novel00340	Pav_sc0000506.1	1	5	4	547	523	667	0.0280952	0.13504	0.136246	14.6982	17.5517	15.9005	0.0997936	16.0502	539.89	3.56565	7.2424	5.1313e-106	9.8174e-103	UP	--	--	--	--	--	--	no KO assigned | (RefSeq) hypothetical protein	http://www.genome.jp/dbget-bin/www_bget?pper:PRUPE_ppa000742mg	--
Pav_sc0000669.1_g030.1.mk	Pav_sc0000669.1	1	1	2	245	178	270	0.0232307	0.0223317	0.0563278	5.44345	4.93932	5.32207	0.0339634	5.23495	212.739	1.44691	7.2	6.015e-60	2.9921e-57	UP	GO:0008150//GO:0019538//GO:0043170//GO:0006793//GO:0008152//GO:0009987//GO:0044237//GO:0044260//GO:0044267//GO:0006468//GO:0006464//GO:0036211//GO:0016310//GO:0043412//GO:0071704//GO:0044238//GO:0006796	biological_process//protein metabolic process//macromolecule metabolic process//phosphorus metabolic process//metabolic process//cellular process//cellular metabolic process//cellular macromolecule metabolic process//cellular protein metabolic process//protein phosphorylation//cellular protein modification process//protein modification process//phosphorylation//macromolecule modification//organic…	--	--	GO:0016772//GO:0030554//GO:0003674//GO:0035639//GO:0005488//GO:0032549//GO:1901363//GO:0032550//GO:0032559//GO:0097367//GO:0016301//GO:0016740//GO:0000166//GO:0005524//GO:0004672//GO:0016773//GO:0003824//GO:0036094//GO:0097159//GO:0017076//GO:0032553//GO:0032555//GO:0043168//GO:0043167//GO:1901265//GO:0001883//GO:0001882	transferase activity, transferring phosphorus-containing groups//adenyl nucleotide binding//molecular_function//purine ribonucleoside triphosphate binding//binding//ribonucleoside binding//heterocyclic compound binding//purine ribonucleoside binding//adenyl ribonucleotide binding//carbohydrate derivative binding//kinase activity//transferase activity//nucleotide binding//ATP binding//protein kina…	K04733 interleukin-1 receptor-associated kinase 4 [EC:2.7.11.1] | (RefSeq) hypothetical protein	http://www.genome.jp/dbget-bin/www_bget?pper:PRUPE_ppa003241mg	PREDICTED: probable receptor-like protein kinase At1g67000
Pav_sc0000829.1_g150.1.br	Pav_sc0000829.1	1	1	0	106	86	129	0.126957	0.122044	0	12.8709	13.0419	13.8963	0.0830004	13.2697	98.7064	0.675551	7.1909	3.478e-33	5.5452e-31	UP	--	--	--	--	--	--	no KO assigned | (RefSeq) hypothetical protein	http://www.genome.jp/dbget-bin/www_bget?pper:PRUPE_ppa026175mg	hypothetical protein PRUPE_ppa026175mg, partial
Pav_sc0006698.1_g020.1.br	Pav_sc0006698.1	0	0	0	32	22	35	0	0	0	3.12863	2.68637	3.03585	0	2.95028	27.2399	0	Inf	1.2579e-11	4.2739e-10	UP	--	--	GO:0031224//GO:0005575//GO:0016021//GO:0016020//GO:0044425	intrinsic component of membrane//cellular_component//integral component of membrane//membrane//membrane part	GO:0003674//GO:0009055	molecular_function//electron carrier activity	--	--	-\-
Pav_sc0002207.1_g750.1.mk	Pav_sc0002207.1	1	1	0	103	93	112	0.143115	0.137577	0	14.0984	15.8984	13.6006	0.0935641	14.5325	95.9577	0.675551	7.1502	3.6841e-32	5.727e-30	UP	--	--	--	--	--	--	no KO assigned | (RefSeq) hypothetical protein	http://www.genome.jp/dbget-bin/www_bget?pper:PRUPE_ppa014695mg	PREDICTED: putative lipid-transfer protein DIR1
Pav_sc0001031.1_g300.1.br	Pav_sc0001031.1	7	2	1	822	432	209	0.586164	0.160994	0.10152	65.8322	43.2105	14.8498	0.282893	41.2975	465.508	3.43031	7.0843	5.088e-07	8.6915e-06	UP	--	--	--	--	--	--	no KO assigned | (RefSeq) hypothetical protein	http://www.genome.jp/dbget-bin/www_bget?pper:PRUPE_ppa011874mg	PREDICTED: heterogeneous nuclear ribonucleoprotein A3 homolog 2-like
Pav_sc0001454.1_g210.1.br	Pav_sc0001454.1	0	0	0	28	22	33	0	0	0	1.08936	1.06899	1.13903	0	1.09913	25.5142	0	Inf	6.1776e-11	1.94e-09	UP	--	--	--	--	--	--	no KO assigned | (RefSeq) hypothetical protein	http://www.genome.jp/dbget-bin/www_bget?pper:PRUPE_ppb020741mg	hypothetical protein
Pav_sc0000143.1_g370.1.mk	Pav_sc0000143.1	0	0	0	45	11	29	0	0	0	5.74189	1.75297	3.28283	0	3.59256	25.3333	0	Inf	3.5527e-06	4.9726e-05	UP	--	--	--	--	--	--	no KO assigned | (RefSeq) hypothetical protein	http://www.genome.jp/dbget-bin/www_bget?pper:PRUPE_ppa024075mg	PREDICTED: em protein H5
Pav_sc0000407.1_g210.1.mk	Pav_sc0000407.1	0	0	0	26	26	28	0	0	0	2.71854	3.39527	2.59734	0	2.90371	25.1118	0	Inf	1.1312e-10	3.4312e-09	UP	GO:0044238//GO:0008610//GO:0044699//GO:1901576//GO:0008152//GO:0044711//GO:0006694//GO:0008202//GO:0055114//GO:0008150//GO:0009058//GO:0071704//GO:0044710//GO:1901360//GO:1901362//GO:0006629	primary metabolic process//lipid biosynthetic process//single-organism process//organic substance biosynthetic process//metabolic process//single-organism biosynthetic process//steroid biosynthetic process//steroid metabolic process//oxidation-reduction process//biological_process//biosynthetic process//organic substance metabolic process//single-organism metabolic process//organic cyclic compoun…	--	--	GO:0048037//GO:0003824//GO:0005488//GO:0003674//GO:0016229//GO:0016614//GO:0003854//GO:0033764//GO:0016491//GO:0016616//GO:0050662	cofactor binding//catalytic activity//binding//molecular_function//steroid dehydrogenase activity//oxidoreductase activity, acting on CH-OH group of donors//3-beta-hydroxy-delta5-steroid dehydrogenase activity//steroid dehydrogenase activity, acting on the CH-OH group of donors, NAD or NADP as acceptor//oxidoreductase activity//oxidoreductase activity, acting on the CH-OH group of donors, NAD or …	no KO assigned | (RefSeq) hypothetical protein	http://www.genome.jp/dbget-bin/www_bget?pper:PRUPE_ppa008548mg	PREDICTED: tetraketide alpha-pyrone reductase 1-like
Pav_sc0002501.1_g100.1.br	Pav_sc0002501.1	0	0	0	33	23	24	0	0	0	2.79138	2.4298	1.80104	0	2.34074	24.9944	0	Inf	1.1885e-10	3.5961e-09	UP	--	--	--	--	--	--	no KO assigned | (RefSeq) hypothetical protein	http://www.genome.jp/dbget-bin/www_bget?pper:PRUPE_ppa002978mg	PREDICTED: transcription factor ABORTED MICROSPORES-like
Pav_sc0002756.1_g020.1.mk	Pav_sc0002756.1	1	3	0	216	142	228	0.0644312	0.185813	0	13.3105	10.9287	12.4648	0.0834149	12.2347	179.199	1.34924	7.0533	2.3042e-52	8.5539e-50	UP	GO:0009394//GO:1901135//GO:0008152//GO:0009141//GO:0009219//GO:0009200//GO:0009211//GO:0008150//GO:0006796//GO:0006139//GO:0055086//GO:0044238//GO:0046080//GO:0019637//GO:0046483//GO:0009147//GO:0044699//GO:0009262//GO:0034641//GO:0006807//GO:0044237//GO:0009987//GO:0006793//GO:0006220//GO:0019692//GO:0006753//GO:0006725//GO:1901564//GO:0044281//GO:0072527//GO:0044763//GO:0009117//GO:0044710//GO:…	2'-deoxyribonucleotide metabolic process//carbohydrate derivative metabolic process//metabolic process//nucleoside triphosphate metabolic process//pyrimidine deoxyribonucleotide metabolic process//deoxyribonucleoside triphosphate metabolic process//pyrimidine deoxyribonucleoside triphosphate metabolic process//biological_process//phosphate-containing compound metabolic process//nucleobase-contain…	--	--	GO:0003674//GO:0016787//GO:0003824	molecular_function//hydrolase activity//catalytic activity	no KO assigned | (RefSeq) hypothetical protein	http://www.genome.jp/dbget-bin/www_bget?pper:PRUPE_ppa021903mg	-\-
Novel00839	Pav_sc0002501.1	0	0	0	24	29	25	0	0	0	2.86034	4.31661	2.64335	0	3.27344	24.8602	0	Inf	1.687e-10	5.0072e-09	UP	--	--	--	--	--	--	no KO assigned | (RefSeq) hypothetical protein	http://www.genome.jp/dbget-bin/www_bget?pper:PRUPE_ppa002978mg	--
Pav_sc0001582.1_g160.1.mk	Pav_sc0001582.1	0	0	1	66	33	54	0	0	0.0592112	3.08293	1.92518	2.2378	0.0197371	2.4153	46.631	0.385678	6.9177	1.3021e-17	8.0559e-16	UP	GO:0044238//GO:0071704//GO:0008152//GO:0006508//GO:0043170//GO:0019538//GO:0008150	primary metabolic process//organic substance metabolic process//metabolic process//proteolysis//macromolecule metabolic process//protein metabolic process//biological_process	GO:0005575//GO:0016020	cellular_component//membrane	GO:0004175//GO:0008237//GO:0070011//GO:0016787//GO:0003824//GO:0008233//GO:0004222//GO:0003674	endopeptidase activity//metallopeptidase activity//peptidase activity, acting on L-amino acid peptides//hydrolase activity//catalytic activity//peptidase activity//metalloendopeptidase activity//molecular_function	no KO assigned | (RefSeq) hypothetical protein	http://www.genome.jp/dbget-bin/www_bget?pper:PRUPE_ppa004270mg	PREDICTED: probable disease resistance RPP8-like protein 2
Pav_sc0000915.1_g040.1.mk	Pav_sc0000915.1	0	0	2	92	75	112	0	0	0.140336	5.09265	5.18508	5.50024	0.0467788	5.25932	85.8163	0.771357	6.7977	2.6998e-29	3.6494e-27	UP	GO:0009451//GO:0043412//GO:0046483//GO:0044238//GO:0006139//GO:0008150//GO:0008152//GO:0044260//GO:0016070//GO:0071704//GO:1901360//GO:0006725//GO:0043170//GO:0044237//GO:0009987//GO:0006807//GO:0034641//GO:0001522//GO:0090304	RNA modification//macromolecule modification//heterocycle metabolic process//primary metabolic process//nucleobase-containing compound metabolic process//biological_process//metabolic process//cellular macromolecule metabolic process//RNA metabolic process//organic substance metabolic process//organic cyclic compound metabolic process//cellular aromatic compound metabolic process//macromolecule m…	--	--	GO:0003824//GO:0016866//GO:0009982//GO:0001871//GO:0003676//GO:0003674//GO:0005488//GO:0016853//GO:0097159//GO:0003723//GO:0030247//GO:1901363//GO:0030246	catalytic activity//intramolecular transferase activity//pseudouridine synthase activity//pattern binding//nucleic acid binding//molecular_function//binding//isomerase activity//organic cyclic compound binding//RNA binding//polysaccharide binding//heterocyclic compound binding//carbohydrate binding	no KO assigned | (RefSeq) hypothetical protein	http://www.genome.jp/dbget-bin/www_bget?pper:PRUPE_ppb020170mg	PREDICTED: probable serine/threonine-protein kinase At1g18390 isoform X1
Pav_sc0000754.1_g570.1.mk	Pav_sc0000754.1	8	2	1	691	455	305	0.954102	0.229295	0.144589	78.8186	64.8188	30.8644	0.442662	58.1673	460.701	3.76902	6.9335	8.5584e-13	3.326e-11	UP	--	--	GO:0044424//GO:0005623//GO:0043231//GO:0005575//GO:0043229//GO:0044464//GO:0005622//GO:0005634//GO:0043226//GO:0043227	intracellular part//cell//intracellular membrane-bounded organelle//cellular_component//intracellular organelle//cell part//intracellular//nucleus//organelle//membrane-bounded organelle	--	--	no KO assigned | (RefSeq) hypothetical protein	http://www.genome.jp/dbget-bin/www_bget?pper:PRUPE_ppa013538mg	hypothetical protein PRUPE_ppa013538mg
Pav_sc0006478.1_g020.1.mk	Pav_sc0006478.1	4	0	0	198	133	206	0.117923	0	0	5.58275	4.68353	5.15298	0.0393076	5.13976	164.547	1.35482	6.9243	9.0182e-49	3.0726e-46	UP	GO:0044710//GO:0044699//GO:0055114//GO:0008152//GO:0008150	single-organism metabolic process//single-organism process//oxidation-reduction process//metabolic process//biological_process	--	--	GO:0043167//GO:0046872//GO:0016730//GO:0016491//GO:0046914//GO:0043169//GO:0005507//GO:0003824//GO:0005488//GO:0003674	ion binding//metal ion binding//oxidoreductase activity, acting on iron-sulfur proteins as donors//oxidoreductase activity//transition metal ion binding//cation binding//copper ion binding//catalytic activity//binding//molecular_function	K00423 L-ascorbate oxidase [EC:1.10.3.3] | (RefSeq) hypothetical protein	http://www.genome.jp/dbget-bin/www_bget?pper:PRUPE_ppa003411mg	PREDICTED: L-ascorbate oxidase-like
Pav_sc0001416.1_g120.1.mk	Pav_sc0001416.1	0	0	0	15	29	27	0	0	0	0.683007	1.64919	1.0907	0	1.14097	22.7059	0	Inf	7.8109e-08	1.5468e-06	UP	--	--	GO:0016020//GO:0005575//GO:0016021//GO:0044425//GO:0031224	membrane//cellular_component//integral component of membrane//membrane part//intrinsic component of membrane	--	--	K15285 solute carrier family 35, member E3 | (RefSeq) hypothetical protein	http://www.genome.jp/dbget-bin/www_bget?pper:PRUPE_ppa018324mg	PREDICTED: uncharacterized membrane protein At1g06890 isoform X1
Pav_sc0012096.1_g020.1.mk	Pav_sc0012096.1	0	0	0	22	17	34	0	0	0	1.3821	1.33384	1.89498	0	1.53697	22.0843	0	Inf	1.1413e-09	3.0101e-08	UP	GO:0016482//GO:0071702//GO:0046907//GO:0034613//GO:0033036//GO:0006888//GO:0048193//GO:0016192//GO:0006810//GO:1902578//GO:0051641//GO:0008150//GO:1902582//GO:0070727//GO:0015031//GO:0045184//GO:0044765//GO:0051179//GO:0044699//GO:0051649//GO:0006886//GO:0008104//GO:0051234	cytoplasmic transport//organic substance transport//intracellular transport//cellular protein localization//macromolecule localization//ER to Golgi vesicle-mediated transport//Golgi vesicle transport//vesicle-mediated transport//transport//single-organism localization//cellular localization//biological_process//single-organism intracellular transport//cellular macromolecule localization//protein …	GO:0043231//GO:0005575//GO:0043229//GO:0044464//GO:0030658//GO:0005622//GO:0030127//GO:0098805//GO:0005737//GO:0031090//GO:0098588//GO:0030120//GO:0012507//GO:0043226//GO:0044422//GO:0031988//GO:0098796//GO:0030135//GO:0043227//GO:0016020//GO:0030133//GO:0031982//GO:0044446//GO:0030117//GO:0005623//GO:0043234//GO:0044424//GO:0032991//GO:0044444//GO:0048475//GO:0030659//GO:0030134//GO:0016023//GO:…	intracellular membrane-bounded organelle//cellular_component//intracellular organelle//cell part//transport vesicle membrane//intracellular//COPII vesicle coat//whole membrane//cytoplasm//organelle membrane//bounding membrane of organelle//vesicle coat//ER to Golgi transport vesicle membrane//organelle//organelle part//membrane-bounded vesicle//membrane protein complex//coated vesicle//membrane-b…	--	--	K14007 protein transport protein SEC24 | (RefSeq) hypothetical protein	http://www.genome.jp/dbget-bin/www_bget?pper:PRUPE_ppa000637mg	PREDICTED: protein transport protein Sec24-like At3g07100
Pav_sc0004687.1_g090.1.mk	Pav_sc0004687.1	0	1	0	44	26	73	0	0.0465645	0	2.03842	1.50436	3.00035	0.0155215	2.18105	42.45	0.336845	6.9775	2.4704e-12	9.157e-11	UP	--	--	--	--	--	--	no KO assigned | (RefSeq) hypothetical protein	http://www.genome.jp/dbget-bin/www_bget?pper:PRUPE_ppa020510mg	hypothetical protein PRUPE_ppa020510mg
Pav_sc0000383.1_g1290.1.mk	Pav_sc0000383.1	0	0	0	42	8	23	0	0	0	1.33694	0.318048	0.64953	0	0.768173	21.6994	0	Inf	0.00011676	0.0011059	UP	--	--	--	--	--	--	no KO assigned | (RefSeq) hypothetical protein	http://www.genome.jp/dbget-bin/www_bget?pper:PRUPE_ppa002234mg	PREDICTED: probable serine/threonine-protein kinase At1g54610
Pav_sc0006347.1_g080.1.br	Pav_sc0006347.1	0	0	0	22	18	28	0	0	0	1.04493	1.06777	1.17986	0	1.09752	20.8699	0	Inf	3.9929e-09	9.8427e-08	UP	GO:0016032//GO:0044419//GO:0008150//GO:0044764//GO:0051704//GO:0044403//GO:0009987	viral process//interspecies interaction between organisms//biological_process//multi-organism cellular process//multi-organism process//symbiosis, encompassing mutualism through parasitism//cellular process	--	--	GO:0017076//GO:0097159//GO:0036094//GO:0032553//GO:0043168//GO:0032555//GO:0016740//GO:0000166//GO:0005524//GO:0004672//GO:0016773//GO:0003824//GO:0043167//GO:0001883//GO:1901265//GO:0001882//GO:0016772//GO:0030554//GO:0035639//GO:0003674//GO:0097367//GO:0032559//GO:0032550//GO:0016301//GO:0005488//GO:0032549//GO:1901363	purine nucleotide binding//organic cyclic compound binding//small molecule binding//ribonucleotide binding//anion binding//purine ribonucleotide binding//transferase activity//nucleotide binding//ATP binding//protein kinase activity//phosphotransferase activity, alcohol group as acceptor//catalytic activity//ion binding//purine nucleoside binding//nucleoside phosphate binding//nucleoside binding/…	no KO assigned | (RefSeq) hypothetical protein	http://www.genome.jp/dbget-bin/www_bget?pper:PRUPE_ppa008874mg	PREDICTED: dehydration-responsive protein RD22-like
Pav_sc0004298.1_g080.1.mk	Pav_sc0004298.1	0	0	0	25	21	18	0	0	0	1.0485	1.09999	0.669747	0	0.939413	20.2492	0	Inf	9.4143e-09	2.1802e-07	UP	--	--	--	--	--	--	no KO assigned | (RefSeq) hypothetical protein	http://www.genome.jp/dbget-bin/www_bget?pper:PRUPE_ppa021903mg	PREDICTED: TMV resistance protein N-like
Pav_sc0000888.1_g030.1.br	Pav_sc0000888.1	0	0	2	105	48	88	0	0	0.465506	19.2797	11.0075	14.3351	0.155169	14.8741	73.0271	0.771357	6.5649	3.5973e-19	2.4513e-17	UP	--	--	--	--	--	--	--	--	-\-
Novel00255	Pav_sc0000357.1	0	0	0	18	19	28	0	0	0	1.33287	1.75715	1.83942	0	1.64315	20.057	0	Inf	8.8149e-09	2.0471e-07	UP	--	--	--	--	GO:0003674//GO:0005488//GO:0003824//GO:0048037//GO:0050662	molecular_function//binding//catalytic activity//cofactor binding//coenzyme binding	no KO assigned | (RefSeq) hypothetical protein	http://www.genome.jp/dbget-bin/www_bget?pper:PRUPE_ppa008548mg	--
Novel01045	Pav_sc0012434.1	0	0	1	32	24	74	0	0	0.0803047	2.02724	1.89892	4.15907	0.0267682	2.69508	38.3723	0.385678	6.6365	7.811e-08	1.5468e-06	UP	--	--	--	--	--	--	no KO assigned | (RefSeq) hypothetical protein	http://www.genome.jp/dbget-bin/www_bget?pper:PRUPE_ppa000742mg	--
Pav_sc0002475.1_g200.1.mk	Pav_sc0002475.1	0	0	0	39	10	16	0	0	0	0.511205	0.163708	0.186062	0	0.286992	19.7047	0	Inf	0.00016171	0.0014661	UP	--	--	--	--	GO:0005488//GO:0005515//GO:0003674	binding//protein binding//molecular_function	no KO assigned | (RefSeq) hypothetical protein	http://www.genome.jp/dbget-bin/www_bget?pper:PRUPE_ppa002913mg	PREDICTED: BTB/POZ domain-containing protein NPY2-like
Novel00406	Pav_sc0000622.1	0	0	0	20	15	30	0	0	0	0.393121	0.368236	0.523149	0	0.428168	19.6617	0	Inf	1.0483e-08	2.4165e-07	UP	GO:0051704//GO:0019058//GO:0046813//GO:0008150//GO:0006810//GO:0019062//GO:0044764//GO:0016043//GO:0044765//GO:0061025//GO:0044419//GO:0016032//GO:0051234//GO:0061024//GO:0044699//GO:0055085//GO:0009987//GO:0044403//GO:0022610//GO:0071840//GO:0044650//GO:1902578//GO:0051179//GO:0044406//GO:0044763	multi-organism process//viral life cycle//receptor-mediated virion attachment to host cell//biological_process//transport//virion attachment to host cell//multi-organism cellular process//cellular component organization//single-organism transport//membrane fusion//interspecies interaction between organisms//viral process//establishment of localization//membrane organization//single-organism proce…	GO:0031224//GO:0019031//GO:0019012//GO:0016021//GO:0005575//GO:0016020//GO:0036338//GO:0044423//GO:0044425	intrinsic component of membrane//viral envelope//virion//integral component of membrane//cellular_component//membrane//viral membrane//virion part//membrane part	GO:0097367//GO:0032559//GO:0015399//GO:0005488//GO:0032561//GO:0003674//GO:0035639//GO:0022804//GO:0030554//GO:0016462//GO:0001882//GO:0019001//GO:0016818//GO:0032553//GO:0043168//GO:0016787//GO:0022857//GO:0036094//GO:0005525//GO:0003824//GO:0005524//GO:0000166//GO:0032550//GO:0032549//GO:1901363//GO:0043492//GO:0016887//GO:0001883//GO:1901265//GO:0043167//GO:0017111//GO:0042626//GO:0016820//GO:…	carbohydrate derivative binding//adenyl ribonucleotide binding//primary active transmembrane transporter activity//binding//guanyl ribonucleotide binding//molecular_function//purine ribonucleoside triphosphate binding//active transmembrane transporter activity//adenyl nucleotide binding//pyrophosphatase activity//nucleoside binding//guanyl nucleotide binding//hydrolase activity, acting on acid an…	no KO assigned | (RefSeq) hypothetical protein	http://www.genome.jp/dbget-bin/www_bget?pper:PRUPE_ppa020395mg	--
Pav_sc0001041.1_g040.1.br	Pav_sc0001041.1	0	0	0	19	20	24	0	0	0	0.838107	1.10183	0.939215	0	0.959717	19.6729	0	Inf	1.3982e-08	3.176e-07	UP	GO:0070727//GO:0051300//GO:0044763//GO:0009893//GO:0048522//GO:0007010//GO:0051179//GO:0006461//GO:0050789//GO:0065003//GO:0044380//GO:0009894//GO:0031329//GO:0044237//GO:0009987//GO:0043933//GO:0072698//GO:0022607//GO:0071822//GO:0007049//GO:0070271//GO:0051641//GO:0019222//GO:0071840//GO:0006914//GO:0000226//GO:0009896//GO:0030474//GO:0016043//GO:0010508//GO:0048518//GO:0044085//GO:0044699//GO:…	cellular macromolecule localization//spindle pole body organization//single-organism cellular process//positive regulation of metabolic process//positive regulation of cellular process//cytoskeleton organization//localization//protein complex assembly//regulation of biological process//macromolecular complex assembly//protein localization to cytoskeleton//regulation of catabolic process//regulati…	GO:0044425//GO:0005575//GO:0016021//GO:0016020//GO:0031224	membrane part//cellular_component//integral component of membrane//membrane//intrinsic component of membrane	GO:0043167//GO:0046914//GO:0046872//GO:0097159//GO:1901363//GO:0043169//GO:0003676//GO:0008270//GO:0005488//GO:0003674	ion binding//transition metal ion binding//metal ion binding//organic cyclic compound binding//heterocyclic compound binding//cation binding//nucleic acid binding//zinc ion binding//binding//molecular_function	--	--	PREDICTED: monoacylglycerol lipase ABHD6
Pav_sc0000039.1_g090.1.br	Pav_sc0000039.1	0	0	0	21	14	28	0	0	0	1.62983	1.35703	1.92792	0	1.63826	19.0473	0	Inf	1.838e-08	4.0981e-07	UP	GO:0009878//GO:0044403//GO:0009653//GO:0009886//GO:0044419//GO:0032501//GO:0044699//GO:0044767//GO:0009877//GO:0044111//GO:0007275//GO:0032502//GO:0051704//GO:0048856//GO:0009791//GO:0044707//GO:0008150	nodule morphogenesis//symbiosis, encompassing mutualism through parasitism//anatomical structure morphogenesis//post-embryonic morphogenesis//interspecies interaction between organisms//multicellular organismal process//single-organism process//single-organism developmental process//nodulation//development involved in symbiotic interaction//multicellular organismal development//developmental proc…	--	--	GO:0043167//GO:0046872//GO:0043169//GO:0005488//GO:0003674	ion binding//metal ion binding//cation binding//binding//molecular_function	K13457 disease resistance protein RPM1 | (RefSeq) hypothetical protein	http://www.genome.jp/dbget-bin/www_bget?pper:PRUPEppa017971m2g	PREDICTED: disease resistance protein RPM1-like
Pav_sc0000491.1_g220.1.mk	Pav_sc0000491.1	0	0	0	26	20	13	0	0	0	0.620068	0.595709	0.275054	0	0.496944	18.8371	0	Inf	3.6423e-08	7.6903e-07	UP	--	--	--	--	--	--	K01193 beta-fructofuranosidase [EC:3.2.1.26] | (RefSeq) hypothetical protein	http://www.genome.jp/dbget-bin/www_bget?pper:PRUPE_ppa003412mg	PREDICTED: beta-fructofuranosidase, insoluble isoenzyme CWINV1-like
Pav_sc0000465.1_g860.1.mk	Pav_sc0000465.1	0	0	0	28	16	16	0	0	0	0.883821	0.630761	0.448058	0	0.654213	18.7077	0	Inf	3.3126e-08	7.0721e-07	UP	--	--	--	--	--	--	no KO assigned | (RefSeq) hypothetical protein	http://www.genome.jp/dbget-bin/www_bget?pper:PRUPE_ppa026157mg	PREDICTED: uncharacterized protein LOC101304253 isoform X2
Pav_sc0009370.1_g060.1.br	Pav_sc0009370.1	0	0	0	19	18	23	0	0	0	2.53163	2.99542	2.71883	0	2.74862	18.6449	0	Inf	3.4039e-08	7.2416e-07	UP	--	--	--	--	--	--	K13457 disease resistance protein RPM1 | (RefSeq) hypothetical protein	http://www.genome.jp/dbget-bin/www_bget?pper:PRUPEppa017971m2g	PREDICTED: disease resistance protein RPM1-like
Pav_sc0002862.1_g260.1.br	Pav_sc0002862.1	0	0	1	35	36	45	0	0	0.117813	3.25295	4.17879	3.71048	0.0392711	3.71407	36.1286	0.385678	6.5496	1.0798e-13	4.6065e-12	UP	--	--	--	--	--	--	no KO assigned | (RefSeq) hypothetical protein	http://www.genome.jp/dbget-bin/www_bget?pper:PRUPE_ppa004518mg	PREDICTED: uncharacterized protein LOC103337062
Pav_sc0001196.1_g680.1.mk	Pav_sc0001196.1	0	0	0	17	18	24	0	0	0	0.571341	0.75554	0.715593	0	0.680825	18.3139	0	Inf	4.5594e-08	9.4188e-07	UP	GO:0009664//GO:0022607//GO:0016049//GO:0009987//GO:0071840//GO:0071668//GO:0030198//GO:0040007//GO:0044763//GO:0070726//GO:0043062//GO:0071554//GO:0045229//GO:0008150//GO:0009832//GO:0071555//GO:0010215//GO:0016043//GO:0071669//GO:0042546//GO:0044699//GO:0044085	plant-type cell wall organization//cellular component assembly//cell growth//cellular process//cellular component organization or biogenesis//plant-type cell wall assembly//extracellular matrix organization//growth//single-organism cellular process//cell wall assembly//extracellular structure organization//cell wall organization or biogenesis//external encapsulating structure organization//biolog…	GO:0031225//GO:0005575//GO:0016020//GO:0044425//GO:0031224	anchored component of membrane//cellular_component//membrane//membrane part//intrinsic component of membrane	--	--	no KO assigned | (RefSeq) hypothetical protein	http://www.genome.jp/dbget-bin/www_bget?pper:PRUPE_ppa022902mg	PREDICTED: COBRA-like protein 6
Pav_sc0006892.1_g060.1.mk	Pav_sc0006892.1	0	0	0	17	18	24	0	0	0	1.43798	1.90158	1.80104	0	1.71354	18.3139	0	Inf	4.5594e-08	9.4188e-07	UP	GO:0044257//GO:0071704//GO:0006511//GO:0051603//GO:0019538//GO:0043170//GO:0044265//GO:0019941//GO:0009057//GO:0009987//GO:0044237//GO:0043632//GO:0030163//GO:1901575//GO:0044238//GO:0044248//GO:0008150//GO:0009056//GO:0006508//GO:0008152//GO:0044267//GO:0044260	cellular protein catabolic process//organic substance metabolic process//ubiquitin-dependent protein catabolic process//proteolysis involved in cellular protein catabolic process//protein metabolic process//macromolecule metabolic process//cellular macromolecule catabolic process//modification-dependent protein catabolic process//macromolecule catabolic process//cellular process//cellular metabol…	--	--	GO:0046914//GO:0046872//GO:0097159//GO:0031419//GO:0046906//GO:0043167//GO:0016829//GO:1901363//GO:0016835//GO:0043169//GO:0003824//GO:0036094//GO:0050215//GO:0003674//GO:0016836//GO:0005488//GO:0008270//GO:0019842	transition metal ion binding//metal ion binding//organic cyclic compound binding//cobalamin binding//tetrapyrrole binding//ion binding//lyase activity//heterocyclic compound binding//carbon-oxygen lyase activity//cation binding//catalytic activity//small molecule binding//propanediol dehydratase activity//molecular_function//hydro-lyase activity//binding//zinc ion binding//vitamin binding	K03094 S-phase kinase-associated protein 1 | (RefSeq) hypothetical protein	http://www.genome.jp/dbget-bin/www_bget?pper:PRUPE_ppa019372mg	SFB-interacting Skp1-like protein 1
Pav_sc0002009.1_g130.1.mk	Pav_sc0002009.1	0	0	0	29	24	2	0	0	0	1.63535	1.6903	0.100058	0	1.1419	18.3316	0	Inf	0.0015567	0.0098821	UP	GO:0055114//GO:0008152//GO:0008150//GO:0044710//GO:0044699	oxidation-reduction process//metabolic process//biological_process//single-organism metabolic process//single-organism process	--	--	GO:0004529//GO:0004097//GO:0004536//GO:0008855//GO:0016895//GO:0016679//GO:0003674//GO:0016788//GO:0016682//GO:0016787//GO:0004527//GO:0016796//GO:0003824//GO:0004518//GO:0016491	exodeoxyribonuclease activity//catechol oxidase activity//deoxyribonuclease activity//exodeoxyribonuclease VII activity//exodeoxyribonuclease activity, producing 5'-phosphomonoesters//oxidoreductase activity, acting on diphenols and related substances as donors//molecular_function//hydrolase activity, acting on ester bonds//oxidoreductase activity, acting on diphenols and related substances as do…	K00422 polyphenol oxidase [EC:1.10.3.1] | (RefSeq) hypothetical protein	http://www.genome.jp/dbget-bin/www_bget?pper:PRUPE_ppa003190mg	PREDICTED: polyphenol oxidase I, chloroplastic-like
Pav_sc0001141.1_g010.1.br	Pav_sc0001141.1	0	0	0	20	18	20	0	0	0	2.95226	3.31845	2.61916	0	2.96329	18.1457	0	Inf	5.6926e-08	1.1577e-06	UP	--	--	--	--	--	--	K01968 3-methylcrotonyl-CoA carboxylase alpha subunit [EC:6.4.1.4] | (RefSeq) hypothetical protein	http://www.genome.jp/dbget-bin/www_bget?pper:PRUPE_ppa001681mg	-\-
Pav_co3995219.1_g010.1.br	Pav_co3995219.1	0	0	0	11	14	35	0	0	0	0.588703	0.935772	1.6618	0	1.06209	17.9241	0	Inf	3.8426e-06	5.3542e-05	UP	--	--	--	--	GO:0005515//GO:0005488//GO:0003674	protein binding//binding//molecular_function	no KO assigned | (RefSeq) hypothetical protein	http://www.genome.jp/dbget-bin/www_bget?pper:PRUPE_ppa015767mg	PREDICTED: receptor-like protein 12
Novel00984	Pav_sc0006546.1	0	0	0	19	19	19	0	0	0	2.15634	2.69312	1.91304	0	2.25416	17.9623	0	Inf	7.1584e-08	1.4301e-06	UP	--	--	--	--	--	--	--	--	--
Novel00928	Pav_sc0004208.1	0	0	0	27	14	16	0	0	0	1.71049	1.1077	0.899258	0	1.23915	17.6472	0	Inf	8.2063e-08	1.6161e-06	UP	GO:0032502//GO:0048856//GO:0048869//GO:0032989//GO:0008150//GO:0016043//GO:0044767//GO:0044699//GO:0009987//GO:0000902//GO:0071840//GO:0009653//GO:0044763	developmental process//anatomical structure development//cellular developmental process//cellular component morphogenesis//biological_process//cellular component organization//single-organism developmental process//single-organism process//cellular process//cell morphogenesis//cellular component organization or biogenesis//anatomical structure morphogenesis//single-organism cellular process	--	--	--	--	K03283 heat shock 70kDa protein 1/8 | (RefSeq) hypothetical protein	http://www.genome.jp/dbget-bin/www_bget?pper:PRUPE_ppa026255mg	--
Pav_sc0004298.1_g070.1.mk	Pav_sc0004298.1	0	0	0	18	15	24	0	0	0	0.263209	0.273941	0.311349	0	0.282833	17.4693	0	Inf	8.8732e-08	1.732e-06	UP	GO:0051234//GO:0044700//GO:0050794//GO:0006399//GO:0034470//GO:0044699//GO:0010467//GO:0008033//GO:0006388//GO:0006139//GO:0044238//GO:0046483//GO:0023052//GO:0008150//GO:0006810//GO:0051716//GO:0008380//GO:0050896//GO:0065007//GO:0044260//GO:0008152//GO:0071704//GO:1901360//GO:0007165//GO:0050789//GO:0016070//GO:0051179//GO:0044763//GO:0043170//GO:0034660//GO:0006725//GO:0000394//GO:0034641//GO:…	establishment of localization//single organism signaling//regulation of cellular process//tRNA metabolic process//ncRNA processing//single-organism process//gene expression//tRNA processing//tRNA splicing, via endonucleolytic cleavage and ligation//nucleobase-containing compound metabolic process//primary metabolic process//heterocycle metabolic process//signaling//biological_process//transport//…	--	--	GO:0043168//GO:0032553//GO:0036094//GO:0016787//GO:0003824//GO:0005524//GO:0000166//GO:0043531//GO:0016462//GO:0001882//GO:0016818//GO:0003676//GO:0003724//GO:0035639//GO:0003674//GO:0004521//GO:0016788//GO:0030554//GO:0097367//GO:0032559//GO:0005515//GO:0016892//GO:0005488//GO:0032555//GO:0017076//GO:0097159//GO:0004386//GO:0004518//GO:0000213//GO:0004519//GO:0016817//GO:0004549//GO:0001883//GO:…	anion binding//ribonucleotide binding//small molecule binding//hydrolase activity//catalytic activity//ATP binding//nucleotide binding//ADP binding//pyrophosphatase activity//nucleoside binding//hydrolase activity, acting on acid anhydrides, in phosphorus-containing anhydrides//nucleic acid binding//RNA helicase activity//purine ribonucleoside triphosphate binding//molecular_function//endoribonuc…	no KO assigned | (RefSeq) hypothetical protein	http://www.genome.jp/dbget-bin/www_bget?pper:PRUPEppa1027137mg	PREDICTED: TMV resistance protein N-like
Pav_sc0001580.1_g500.1.mk	Pav_sc0001580.1	0	0	0	19	12	26	0	0	0	0.259831	0.204954	0.315441	0	0.260076	17.1566	0	Inf	1.0199e-07	1.9649e-06	UP	--	--	--	--	GO:0005488//GO:0005515//GO:0032559//GO:0097367//GO:0030554//GO:0003674//GO:0035639//GO:0016818//GO:0016462//GO:0001882//GO:0043531//GO:0005524//GO:0000166//GO:0003824//GO:0036094//GO:0016787//GO:0043168//GO:0032553//GO:1901363//GO:0032549//GO:0032550//GO:0016887//GO:0017111//GO:1901265//GO:0001883//GO:0043167//GO:0016817//GO:0097159//GO:0017076//GO:0032555	binding//protein binding//adenyl ribonucleotide binding//carbohydrate derivative binding//adenyl nucleotide binding//molecular_function//purine ribonucleoside triphosphate binding//hydrolase activity, acting on acid anhydrides, in phosphorus-containing anhydrides//pyrophosphatase activity//nucleoside binding//ADP binding//ATP binding//nucleotide binding//catalytic activity//small molecule binding…	no KO assigned | (RefSeq) hypothetical protein	http://www.genome.jp/dbget-bin/www_bget?pper:PRUPE_ppa017548mg	Disease resistance protein RPM1
Pav_sc0001196.1_g610.1.mk	Pav_sc0001196.1	0	0	0	16	13	27	0	0	0	0.780467	0.791985	1.16844	0	0.913631	16.9081	0	Inf	1.3186e-07	2.494e-06	UP	--	--	--	--	--	--	K03027 DNA-directed RNA polymerases I and III subunit RPAC1 | (RefSeq) hypothetical protein	http://www.genome.jp/dbget-bin/www_bget?pper:PRUPE_ppa006811mg	PREDICTED: DNA-directed RNA polymerases I and III subunit RPAC1
Pav_sc0000554.1_g1980.1.br	Pav_sc0000554.1	0	0	0	18	9	29	0	0	0	1.40423	0.876897	2.00712	0	1.42942	16.5128	0	Inf	1.5773e-07	2.9496e-06	UP	--	--	--	--	--	--	no KO assigned | (RefSeq) hypothetical protein	http://www.genome.jp/dbget-bin/www_bget?pper:PRUPE_ppa012171mg	PREDICTED: eukaryotic translation initiation factor 5B-like
Pav_sc0007240.1_g030.1.mk	Pav_sc0007240.1	0	2	0	56	66	68	0	0.101227	0	2.81995	4.15084	3.03788	0.0337424	3.33622	59.9426	0.673691	6.4754	9.7592e-21	7.5382e-19	UP	--	--	--	--	--	--	no KO assigned | (RefSeq) hypothetical protein	http://www.genome.jp/dbget-bin/www_bget?pper:PRUPE_ppa009279mg	PREDICTED: eyes absent homolog 2
Pav_sc0000381.1_g190.1.mk	Pav_sc0000381.1	0	0	0	17	13	24	0	0	0	0.694916	0.66369	0.870368	0	0.742991	16.4088	0	Inf	2.2086e-07	4.0243e-06	UP	--	--	--	--	--	--	no KO assigned | (RefSeq) hypothetical protein	http://www.genome.jp/dbget-bin/www_bget?pper:PRUPE_ppa026075mg	PREDICTED: glucan endo-1,3-beta-glucosidase-like protein 2
Pav_sc0000465.1_g1100.1.mk	Pav_sc0000465.1	10	9	4	771	591	854	1.07827	0.932885	0.522897	79.5108	76.1198	78.1336	0.844683	77.9214	682.379	7.96138	6.4214	7.7288e-111	1.9223e-107	UP	GO:0008150//GO:0033036//GO:0006810//GO:0008104//GO:0051234//GO:0045184//GO:0071702//GO:0051179//GO:0015031	biological_process//macromolecule localization//transport//protein localization//establishment of localization//establishment of protein localization//organic substance transport//localization//protein transport	GO:0031224//GO:0016020//GO:0016021//GO:0005575//GO:0044425	intrinsic component of membrane//membrane//integral component of membrane//cellular_component//membrane part	GO:0022892//GO:0003674//GO:0008565//GO:0005215	substrate-specific transporter activity//molecular_function//protein transporter activity//transporter activity	K12275 translocation protein SEC62 | (RefSeq) hypothetical protein	http://www.genome.jp/dbget-bin/www_bget?pper:PRUPE_ppa007283mg	PREDICTED: translocation protein sec62
Pav_sc0007998.1_g010.1.mk	Pav_sc0007998.1	0	0	0	18	13	22	0	0	0	1.34167	1.21019	1.4548	0	1.33556	16.1755	0	Inf	2.8391e-07	5.0761e-06	UP	--	--	--	--	--	--	no KO assigned | (RefSeq) hypothetical protein	http://www.genome.jp/dbget-bin/www_bget?pper:PRUPE_ppa023243mg	PREDICTED: UPF0481 protein At3g47200-like
Pav_sc0000383.1_g360.1.mk	Pav_sc0000383.1	0	0	0	18	22	9	0	0	0	0.4144	0.632569	0.183822	0	0.410264	16.1478	0	Inf	3.3692e-05	0.00037128	UP	--	--	--	--	--	--	no KO assigned | (RefSeq) hypothetical protein	http://www.genome.jp/dbget-bin/www_bget?pper:PRUPE_ppa003084mg	PREDICTED: uncharacterized protein LOC103338790 isoform X1
Pav_sc0004371.1_g010.1.br	Pav_sc0004371.1	0	0	0	23	17	10	0	0	0	0.672427	0.620733	0.259373	0	0.517511	16.001	0	Inf	5.0632e-07	8.6577e-06	UP	GO:0044763//GO:0009653//GO:0071840//GO:0000902//GO:0009987//GO:0044767//GO:0044699//GO:0016043//GO:0032989//GO:0008150//GO:0048856//GO:0048869//GO:0032502	single-organism cellular process//anatomical structure morphogenesis//cellular component organization or biogenesis//cell morphogenesis//cellular process//single-organism developmental process//single-organism process//cellular component organization//cellular component morphogenesis//biological_process//anatomical structure development//cellular developmental process//developmental process	--	--	--	--	K03283 heat shock 70kDa protein 1/8 | (RefSeq) hypothetical protein	http://www.genome.jp/dbget-bin/www_bget?pper:PRUPE_ppa026255mg	PREDICTED: heat shock cognate 70 kDa protein-like
Novel00191	Pav_sc0000218.1	0	0	0	10	12	30	0	0	0	0.608754	0.912351	1.62021	0	1.0471	15.534	0	Inf	3.5086e-06	4.9219e-05	UP	--	--	--	--	--	--	no KO assigned | (RefSeq) hypothetical protein	http://www.genome.jp/dbget-bin/www_bget?pper:PRUPE_ppa019750mg	--
Pav_sc0001110.1_g040.1.mk	Pav_sc0001110.1	0	0	0	24	10	17	0	0	0	1.6351	0.850885	1.02752	0	1.17117	15.4937	0	Inf	5.1695e-07	8.8127e-06	UP	--	--	--	--	--	--	no KO assigned | (RefSeq) hypothetical protein	http://www.genome.jp/dbget-bin/www_bget?pper:PRUPE_ppa015982mg	hypothetical protein PRUPE_ppa015982mg, partial
Pav_sc0000702.1_g320.1.mk	Pav_sc0000702.1	0	0	0	24	18	6	0	0	0	0.974007	0.912351	0.216028	0	0.700795	15.6168	0	Inf	0.00010208	0.00098062	UP	--	--	--	--	--	--	no KO assigned | (RefSeq) hypothetical protein	http://www.genome.jp/dbget-bin/www_bget?pper:PRUPE_ppa012697mg	hypothetical protein VITISV_020655
Pav_sc0000759.1_g560.1.br	Pav_sc0000759.1	0	0	0	13	15	21	0	0	0	0.250942	0.361626	0.359631	0	0.324066	15.1793	0	Inf	8.0023e-07	1.319e-05	UP	--	--	--	--	--	--	no KO assigned | (RefSeq) hypothetical protein	http://www.genome.jp/dbget-bin/www_bget?pper:PRUPE_ppa018392mg	hypothetical protein
Novel00037	Pav_sc0000017.1	0	1	0	7	68	4	0	0.0909828	0	0.633641	7.68764	0.321228	0.0303276	2.88084	29.0619	0.336845	6.4309	0.10546	0.27212	FALSE	--	--	--	--	--	--	--	--	--
Pav_sc0000420.1_g020.1.br	Pav_sc0000420.1	0	0	0	19	6	24	0	0	0	0.283241	0.11171	0.317411	0	0.237454	14.3387	0	Inf	1.1711e-06	1.8552e-05	UP	--	--	--	--	GO:0003674//GO:0005515//GO:0005488	molecular_function//protein binding//binding	no KO assigned | (RefSeq) hypothetical protein	http://www.genome.jp/dbget-bin/www_bget?pper:PRUPE_ppa017831mg	PREDICTED: LRR receptor-like serine/threonine-protein kinase GSO1
Pav_sc0000484.1_g820.1.br	Pav_sc0000484.1	1	1	0	58	47	63	0.162296	0.156015	0	9.00287	9.11149	8.67564	0.106104	8.93	51.9707	0.675551	6.2655	2.779e-18	1.786e-16	UP	GO:0009889//GO:0044237//GO:0009987//GO:0019219//GO:2000104//GO:0090304//GO:0007049//GO:0006807//GO:0034641//GO:0048478//GO:0033554//GO:0006725//GO:2000112//GO:0019222//GO:0043170//GO:0060255//GO:0048523//GO:0044763//GO:0010556//GO:0009059//GO:0009058//GO:0050789//GO:1901360//GO:0080090//GO:0006275//GO:0006974//GO:0071704//GO:0045005//GO:0090329//GO:0010605//GO:0051053//GO:0006950//GO:0051171//GO:…	regulation of biosynthetic process//cellular metabolic process//cellular process//regulation of nucleobase-containing compound metabolic process//negative regulation of DNA-dependent DNA replication//nucleic acid metabolic process//cell cycle//nitrogen compound metabolic process//cellular nitrogen compound metabolic process//replication fork protection//cellular response to stress//cellular aroma…	GO:0005575//GO:0005622//GO:0043227//GO:0044424//GO:0043229//GO:0043231//GO:0005634//GO:0044464//GO:0043226//GO:0005623	cellular_component//intracellular//membrane-bounded organelle//intracellular part//intracellular organelle//intracellular membrane-bounded organelle//nucleus//cell part//organelle//cell	--	--	K10904 TIMELESS-interacting protein | (RefSeq) hypothetical protein	http://www.genome.jp/dbget-bin/www_bget?pper:PRUPE_ppa009221mg	PREDICTED: TIMELESS-interacting protein
Novel00341	Pav_sc0000506.1	7	6	2	344	339	582	0.357016	0.294171	0.123666	16.78	20.6525	25.1864	0.258284	20.873	386.594	5.16337	6.2264	9.1467e-40	2.0495e-37	UP	--	--	--	--	GO:0005515//GO:0005488//GO:0003674	protein binding//binding//molecular_function	no KO assigned | (RefSeq) hypothetical protein	http://www.genome.jp/dbget-bin/www_bget?pper:PRUPE_ppa000742mg	--
Pav_sc0002479.1_g300.1.br	Pav_sc0002479.1	0	0	0	25	11	9	0	0	0	2.72763	1.49891	0.871156	0	1.69923	14.0459	0	Inf	3.5709e-05	0.00039006	UP	--	--	--	--	--	--	--	--	-\-
Pav_sc0001175.1_g090.1.mk	Pav_sc0001175.1	0	2	0	57	30	82	0	0.157914	0	4.47768	2.94332	5.71478	0.0526382	4.37859	50.2472	0.673691	6.2208	5.3183e-14	2.3412e-12	UP	--	--	--	--	--	--	--	--	PREDICTED: uncharacterized protein LOC103340063
Pav_sc0000095.1_g1070.1.mk	Pav_sc0000095.1	13	12	4	909	609	833	1.07713	0.955798	0.401805	72.0335	60.2736	58.5631	0.811578	63.6234	724.841	9.98803	6.1813	1.2903e-110	2.9176e-107	UP	--	--	--	--	--	--	K09840 9-cis-epoxycarotenoid dioxygenase [EC:1.13.11.51] | (RefSeq) hypothetical protein	http://www.genome.jp/dbget-bin/www_bget?pper:PRUPE_ppa002804mg	Os07g0154201, partial
Pav_sc0000100.1_g390.1.mk	Pav_sc0000100.1	0	0	0	20	5	22	0	0	0	1.07803	0.336597	1.05204	0	0.822223	13.7243	0	Inf	7.9265e-06	0.00010354	UP	--	--	--	--	--	--	no KO assigned | (RefSeq) hypothetical protein	http://www.genome.jp/dbget-bin/www_bget?pper:PRUPE_ppa023967mg	PREDICTED: TMV resistance protein N-like
Pav_sc0001797.1_g080.1.br	Pav_sc0001797.1	0	0	0	17	9	19	0	0	0	2.15093	1.42219	2.13275	0	1.90196	13.5552	0	Inf	3.0012e-06	4.2801e-05	UP	GO:0043412//GO:0016310//GO:0006796//GO:0044238//GO:0008150//GO:0044260//GO:0044267//GO:0006468//GO:0006464//GO:0008152//GO:0071704//GO:0036211//GO:0019538//GO:0043170//GO:0006793//GO:0044237//GO:0009987	macromolecule modification//phosphorylation//phosphate-containing compound metabolic process//primary metabolic process//biological_process//cellular macromolecule metabolic process//cellular protein metabolic process//protein phosphorylation//cellular protein modification process//metabolic process//organic substance metabolic process//protein modification process//protein metabolic process//mac…	--	--	GO:0036094//GO:0032553//GO:0043168//GO:0016740//GO:0005524//GO:0000166//GO:0004672//GO:0003824//GO:0016773//GO:0001882//GO:0030554//GO:0003674//GO:0035639//GO:0097367//GO:0032559//GO:0016301//GO:0005488//GO:0097159//GO:0017076//GO:0032555//GO:0001883//GO:1901265//GO:0043167//GO:0016772//GO:0032550//GO:0032549//GO:1901363	small molecule binding//ribonucleotide binding//anion binding//transferase activity//ATP binding//nucleotide binding//protein kinase activity//catalytic activity//phosphotransferase activity, alcohol group as acceptor//nucleoside binding//adenyl nucleotide binding//molecular_function//purine ribonucleoside triphosphate binding//carbohydrate derivative binding//adenyl ribonucleotide binding//kinas…	no KO assigned | (RefSeq) hypothetical protein	http://www.genome.jp/dbget-bin/www_bget?pper:PRUPE_ppa014943mg	PREDICTED: probable LRR receptor-like serine/threonine-protein kinase At1g05700
Pav_sc0001660.1_g010.1.mk	Pav_sc0001660.1	0	0	0	10	17	15	0	0	0	0.25462	0.540605	0.338837	0	0.378021	13.4505	0	Inf	4.9484e-06	6.7269e-05	UP	GO:0044765//GO:0051234//GO:0044699//GO:0006820//GO:0006811//GO:0008150//GO:0006810//GO:0051179//GO:1902578	single-organism transport//establishment of localization//single-organism process//anion transport//ion transport//biological_process//transport//localization//single-organism localization	GO:0031224//GO:0044425//GO:0016021//GO:0005575//GO:0016020	intrinsic component of membrane//membrane part//integral component of membrane//cellular_component//membrane	--	--	no KO assigned | (RefSeq) hypothetical protein	http://www.genome.jp/dbget-bin/www_bget?pper:PRUPE_ppa024840mg	PREDICTED: boron transporter 4
Pav_sc0002231.1_g090.1.br	Pav_sc0002231.1	1	0	0	37	22	24	0.0430128	0	0	1.52211	1.13033	0.875917	0.0143376	1.17612	25.8072	0.338706	6.2516	6.4103e-10	1.7521e-08	UP	--	--	--	--	--	--	no KO assigned | (RefSeq) hypothetical protein	http://www.genome.jp/dbget-bin/www_bget?pper:PRUPE_ppa013789mg	hypothetical protein PRUPE_ppa013789mg
Pav_sc0004971.1_g050.1.br	Pav_sc0004971.1	0	0	0	19	10	14	0	0	0	2.86074	1.88046	1.87008	0	2.20376	13.2036	0	Inf	4.7346e-06	6.4668e-05	UP	GO:0019438//GO:1901362//GO:0018130//GO:0043170//GO:0034660//GO:0006725//GO:2000112//GO:0019222//GO:2001141//GO:0090304//GO:0034641//GO:0006807//GO:0009889//GO:0006355//GO:0031123//GO:0044237//GO:0009987//GO:0019219//GO:0006396//GO:0080090//GO:1901360//GO:0032774//GO:0071704//GO:0034472//GO:0050789//GO:0016073//GO:0016070//GO:0097659//GO:0016180//GO:0006351//GO:0009058//GO:0060255//GO:0010556//GO:…	aromatic compound biosynthetic process//organic cyclic compound biosynthetic process//heterocycle biosynthetic process//macromolecule metabolic process//ncRNA metabolic process//cellular aromatic compound metabolic process//regulation of cellular macromolecule biosynthetic process//regulation of metabolic process//regulation of RNA biosynthetic process//nucleic acid metabolic process//cellular ni…	--	--	GO:1901363//GO:0097159//GO:0004518//GO:0016788//GO:0003674//GO:0005488//GO:0003677//GO:0016787//GO:0003824//GO:0003676	heterocyclic compound binding//organic cyclic compound binding//nuclease activity//hydrolase activity, acting on ester bonds//molecular_function//binding//DNA binding//hydrolase activity//catalytic activity//nucleic acid binding	no KO assigned | (RefSeq) hypothetical protein	http://www.genome.jp/dbget-bin/www_bget?pper:PRUPE_ppa003410mg	-\-
Novel00559	Pav_sc0000977.1	0	0	0	22	11	9	0	0	0	1.57735	0.985001	0.572474	0	1.04494	13.1505	0	Inf	5.6452e-06	7.6019e-05	UP	--	--	--	--	GO:0003674//GO:0005515//GO:0005488	molecular_function//protein binding//binding	no KO assigned | (RefSeq) hypothetical protein	http://www.genome.jp/dbget-bin/www_bget?pper:PRUPE_ppa015971mg	--
Pav_sc0006608.1_g010.1.br	Pav_sc0006608.1	2	1	1	85	85	130	0.14922	0.0717226	0.0904538	6.06542	7.5753	8.22988	0.103799	7.2902	92.3236	1.39994	6.0433	3.2285e-29	4.2941e-27	UP	GO:0071704//GO:0036211//GO:0019538//GO:0043170//GO:0009987//GO:0044237//GO:0006793//GO:0043412//GO:0016310//GO:0006796//GO:0044238//GO:0008150//GO:0006464//GO:0044260//GO:0044267//GO:0006468//GO:0008152	organic substance metabolic process//protein modification process//protein metabolic process//macromolecule metabolic process//cellular process//cellular metabolic process//phosphorus metabolic process//macromolecule modification//phosphorylation//phosphate-containing compound metabolic process//primary metabolic process//biological_process//cellular protein modification process//cellular macromo…	--	--	GO:0032555//GO:0097159//GO:0017076//GO:0043167//GO:1901265//GO:0001883//GO:0016772//GO:0032550//GO:0032549//GO:1901363//GO:0032553//GO:0043168//GO:0036094//GO:0004672//GO:0016773//GO:0003824//GO:0016740//GO:0000166//GO:0005524//GO:0001882//GO:0003674//GO:0035639//GO:0030554//GO:0016301//GO:0032559//GO:0097367//GO:0005488	purine ribonucleotide binding//organic cyclic compound binding//purine nucleotide binding//ion binding//nucleoside phosphate binding//purine nucleoside binding//transferase activity, transferring phosphorus-containing groups//purine ribonucleoside binding//ribonucleoside binding//heterocyclic compound binding//ribonucleotide binding//anion binding//small molecule binding//protein kinase activity/…	K04733 interleukin-1 receptor-associated kinase 4 [EC:2.7.11.1] | (RefSeq) hypothetical protein	http://www.genome.jp/dbget-bin/www_bget?pper:PRUPE_ppa025186mg	PREDICTED: probable receptor-like protein kinase At1g67000
Pav_sc0000148.1_g010.1.br	Pav_sc0000148.1	0	0	0	14	14	12	0	0	0	0.442839	0.553075	0.336749	0	0.444221	12.7036	0	Inf	9.3239e-06	0.00011886	UP	--	--	--	--	--	--	no KO assigned | (RefSeq) hypothetical protein	http://www.genome.jp/dbget-bin/www_bget?pper:PRUPE_ppb020897mg	PREDICTED: uncharacterized protein LOC103337115
Pav_sc0009141.1_g010.1.br	Pav_sc0009141.1	0	0	0	20	4	19	0	0	0	1.2291	0.307013	1.03591	0	0.857341	12.5455	0	Inf	5.2801e-05	0.00055249	UP	--	--	--	--	--	--	no KO assigned | (RefSeq) hypothetical protein	http://www.genome.jp/dbget-bin/www_bget?pper:PRUPE_ppb019197mg	PREDICTED: putative ribonuclease H protein At1g65750
Pav_sc0000323.1_g800.1.mk	Pav_sc0000323.1	0	0	0	21	7	13	0	0	0	0.925425	0.385264	0.508245	0	0.606311	12.3916	0	Inf	9.2071e-06	0.00011768	UP	GO:0009058//GO:0031326//GO:0006139//GO:0044271//GO:0051252//GO:0046483//GO:1903506//GO:0009059//GO:0044238//GO:0010556//GO:0060255//GO:0050794//GO:0071704//GO:0032774//GO:1901360//GO:0043412//GO:0031323//GO:1901576//GO:0044249//GO:0080090//GO:0036211//GO:0006351//GO:0097659//GO:0016070//GO:0010468//GO:0010467//GO:0050789//GO:0006807//GO:0034641//GO:0006464//GO:0065007//GO:0044260//GO:0044267//GO:…	biosynthetic process//regulation of cellular biosynthetic process//nucleobase-containing compound metabolic process//cellular nitrogen compound biosynthetic process//regulation of RNA metabolic process//heterocycle metabolic process//regulation of nucleic acid-templated transcription//macromolecule biosynthetic process//primary metabolic process//regulation of macromolecule biosynthetic process//…	--	--	GO:0043167//GO:0003700//GO:0016151//GO:0003676//GO:0001071//GO:0046872//GO:0097159//GO:0003677//GO:0043565//GO:0046914//GO:0043169//GO:0005515//GO:1901363//GO:0005488//GO:0008270//GO:0003674	ion binding//transcription factor activity, sequence-specific DNA binding//nickel cation binding//nucleic acid binding//nucleic acid binding transcription factor activity//metal ion binding//organic cyclic compound binding//DNA binding//sequence-specific DNA binding//transition metal ion binding//cation binding//protein binding//heterocyclic compound binding//binding//zinc ion binding//molecular_…	no KO assigned | (RefSeq) hypothetical protein	http://www.genome.jp/dbget-bin/www_bget?pper:PRUPE_ppa009811mg	Dof-type zinc finger domain-containing protein
Pav_sc0000412.1_g070.1.mk	Pav_sc0000412.1	1	1	0	59	35	52	0.0349837	0.0336299	0	1.97408	1.46258	1.54356	0.0228712	1.66007	44.772	0.675551	6.0504	6.7329e-16	3.5404e-14	UP	GO:0051234//GO:0008104//GO:0032940//GO:0044699//GO:0044765//GO:0045184//GO:0008150//GO:0006810//GO:0009306//GO:0033036//GO:0030255//GO:0051649//GO:0051179//GO:0044763//GO:0015031//GO:0046903//GO:0051641//GO:1902578//GO:0044097//GO:0055085//GO:0071806//GO:0009987//GO:0071702	establishment of localization//protein localization//secretion by cell//single-organism process//single-organism transport//establishment of protein localization//biological_process//transport//protein secretion//macromolecule localization//protein secretion by the type IV secretion system//establishment of localization in cell//localization//single-organism cellular process//protein transport//s…	--	--	GO:0032553//GO:0043168//GO:0016787//GO:0036094//GO:0003824//GO:0000166//GO:0005524//GO:0001882//GO:0016462//GO:0043531//GO:0016818//GO:0003674//GO:0035639//GO:0030554//GO:0097367//GO:0032559//GO:0005488//GO:0032555//GO:0097159//GO:0017076//GO:0016817//GO:0043167//GO:0001883//GO:1901265//GO:0017111//GO:0016887//GO:0032550//GO:0032549//GO:1901363	ribonucleotide binding//anion binding//hydrolase activity//small molecule binding//catalytic activity//nucleotide binding//ATP binding//nucleoside binding//pyrophosphatase activity//ADP binding//hydrolase activity, acting on acid anhydrides, in phosphorus-containing anhydrides//molecular_function//purine ribonucleoside triphosphate binding//adenyl nucleotide binding//carbohydrate derivative bindi…	no KO assigned | (RefSeq) hypothetical protein	http://www.genome.jp/dbget-bin/www_bget?pper:PRUPE_ppa017752mg	PREDICTED: TMV resistance protein N-like
Pav_sc0000586.1_g490.1.mk	Pav_sc0000586.1	0	0	0	19	2	22	0	0	0	1.12924	0.148457	1.16001	0	0.81257	12.2828	0	Inf	0.00080801	0.0057126	UP	--	--	--	--	--	--	K09422 myb proto-oncogene protein, plant | (RefSeq) hypothetical protein	http://www.genome.jp/dbget-bin/www_bget?pper:PRUPE_ppa009439mg	R2R3-MYB transcription factor
Pav_sc0004252.1_g050.1.br	Pav_sc0004252.1	0	1	0	24	20	35	0	0.225873	0	5.39338	5.6133	6.97792	0.0752909	5.99487	24.0902	0.336845	6.1602	2.2443e-09	5.7017e-08	UP	--	--	--	--	--	--	--	--	-\-
Pav_sc0000500.1_g240.1.br	Pav_sc0000500.1	2	4	4	266	176	291	0.0431898	0.0830369	0.104723	5.49387	4.53992	5.3321	0.0769832	5.12196	223.829	3.56751	5.9713	1.3823e-56	5.7301e-54	UP	--	--	--	--	GO:1901363//GO:0003723//GO:0016814//GO:0097159//GO:0005488//GO:0016810//GO:0004000//GO:0019239//GO:0003674//GO:0003726//GO:0003676//GO:0003824//GO:0016787	heterocyclic compound binding//RNA binding//hydrolase activity, acting on carbon-nitrogen (but not peptide) bonds, in cyclic amidines//organic cyclic compound binding//binding//hydrolase activity, acting on carbon-nitrogen (but not peptide) bonds//adenosine deaminase activity//deaminase activity//molecular_function//double-stranded RNA adenosine deaminase activity//nucleic acid binding//catalytic…	no KO assigned | (RefSeq) hypothetical protein	http://www.genome.jp/dbget-bin/www_bget?pper:PRUPE_ppa022177mg	PREDICTED: uncharacterized abhydrolase domain-containing protein DDB_G0269086-like
Pav_sc0001196.1_g560.1.br	Pav_sc0001196.1	0	0	0	10	14	15	0	0	0	1.26525	2.2123	1.68375	0	1.72043	12.3075	0	Inf	1.2936e-05	0.00015896	UP	GO:0031167//GO:0032259//GO:0022613//GO:0006364//GO:0016070//GO:0071704//GO:0000154//GO:1901360//GO:0006396//GO:0009987//GO:0044237//GO:0006807//GO:0034641//GO:0090304//GO:0043414//GO:0006725//GO:0043170//GO:0071840//GO:0034660//GO:0046483//GO:0044238//GO:0042254//GO:0006139//GO:0044085//GO:0010467//GO:0009451//GO:0034470//GO:0043412//GO:0008152//GO:0016072//GO:0044260//GO:0001510//GO:0008150	rRNA methylation//methylation//ribonucleoprotein complex biogenesis//rRNA processing//RNA metabolic process//organic substance metabolic process//rRNA modification//organic cyclic compound metabolic process//RNA processing//cellular process//cellular metabolic process//nitrogen compound metabolic process//cellular nitrogen compound metabolic process//nucleic acid metabolic process//macromolecule …	--	--	GO:0016741//GO:0097159//GO:0008168//GO:1901363//GO:0003676//GO:0003824//GO:0016740//GO:0003677//GO:0005488//GO:0003674	transferase activity, transferring one-carbon groups//organic cyclic compound binding//methyltransferase activity//heterocyclic compound binding//nucleic acid binding//catalytic activity//transferase activity//DNA binding//binding//molecular_function	no KO assigned | (RefSeq) hypothetical protein	http://www.genome.jp/dbget-bin/www_bget?pper:PRUPE_ppa013524mg	hypothetical protein PRUPE_ppa013524mg
Pav_sc0002208.1_g300.1.mk	Pav_sc0002208.1	16	7	4	893	546	444	0.343009	0.144259	0.103962	18.3098	13.9818	8.07648	0.197077	13.456	592.623	9.31992	5.9907	1.2993e-13	5.5051e-12	UP	--	--	--	--	--	--	no KO assigned | (RefSeq) hypothetical protein	http://www.genome.jp/dbget-bin/www_bget?pper:PRUPE_ppa003185mg	PREDICTED: jacalin-related lectin 3
Pav_sc0001279.1_g070.1.br	Pav_sc0001279.1	1	0	0	24	19	35	0.14993	0	0	3.44149	3.40273	4.45258	0.0499768	3.7656	23.7092	0.338706	6.1293	3.0112e-09	7.5121e-08	UP	GO:0044765//GO:0044699//GO:0051234//GO:0006810//GO:0033036//GO:0006869//GO:0008150//GO:0051179//GO:0010876//GO:0071702//GO:1902578	single-organism transport//single-organism process//establishment of localization//transport//macromolecule localization//lipid transport//biological_process//localization//lipid localization//organic substance transport//single-organism localization	--	--	GO:0005319//GO:0003674//GO:0022892//GO:0005215	lipid transporter activity//molecular_function//substrate-specific transporter activity//transporter activity	--	--	-\-
Pav_sc0000830.1_g460.1.mk	Pav_sc0000830.1	0	0	0	20	5	15	0	0	0	0.808765	0.252523	0.538136	0	0.533142	11.8629	0	Inf	1.9616e-05	0.00023024	UP	--	--	--	--	--	--	no KO assigned | (RefSeq) hypothetical protein	http://www.genome.jp/dbget-bin/www_bget?pper:PRUPE_ppa020764mg	PREDICTED: protein GAST1-like
Pav_sc0002327.1_g900.1.mk	Pav_sc0002327.1	3	1	4	264	169	108	0.116901	0.0374591	0.188968	9.83891	7.86626	3.57088	0.114443	7.09202	171.903	2.89568	5.8916	2.3946e-09	6.0651e-08	UP	--	--	--	--	--	--	no KO assigned | (RefSeq) hypothetical protein	http://www.genome.jp/dbget-bin/www_bget?pper:PRUPE_ppa004980mg	PREDICTED: amino acid permease 6-like
Pav_sc0003846.1_g150.1.br	Pav_sc0003846.1	0	0	0	17	10	11	0	0	0	0.537733	0.395054	0.308687	0	0.413825	11.809	0	Inf	1.8793e-05	0.00022142	UP	--	--	--	--	--	--	no KO assigned | (RefSeq) hypothetical protein	http://www.genome.jp/dbget-bin/www_bget?pper:PRUPE_ppa018392mg	hypothetical protein PRUPE_ppa018392mg, partial
Pav_sc0000206.1_g560.1.br	Pav_sc0000206.1	0	0	0	18	12	7	0	0	0	1.56657	1.30436	0.540486	0	1.13714	11.8058	0	Inf	2.1955e-05	0.00025386	UP	--	--	--	--	GO:0003674//GO:0005488//GO:0005515	molecular_function//binding//protein binding	K00799 glutathione S-transferase [EC:2.5.1.18] | (RefSeq) hypothetical protein	http://www.genome.jp/dbget-bin/www_bget?pper:PRUPE_ppa011242mg	PREDICTED: probable glutathione S-transferase parA
Pav_sc0000563.1_g270.1.mk	Pav_sc0000563.1	4	14	3	477	394	559	0.0897872	0.302094	0.0816406	10.2404	10.5642	10.6468	0.157841	10.4838	441.129	7.22769	5.9315	3.8074e-84	4.3045e-81	UP	GO:0050896//GO:0055114//GO:0006950//GO:0008152//GO:0008150//GO:0044699//GO:0006952//GO:0044710	response to stimulus//oxidation-reduction process//response to stress//metabolic process//biological_process//single-organism process//defense response//single-organism metabolic process	--	--	GO:0005488//GO:0003674//GO:0020037//GO:0003824//GO:0043169//GO:1901363//GO:0005506//GO:0043167//GO:0046906//GO:0016705//GO:0046872//GO:0097159//GO:0016491//GO:0046914	binding//molecular_function//heme binding//catalytic activity//cation binding//heterocyclic compound binding//iron ion binding//ion binding//tetrapyrrole binding//oxidoreductase activity, acting on paired donors, with incorporation or reduction of molecular oxygen//metal ion binding//organic cyclic compound binding//oxidoreductase activity//transition metal ion binding	K09843 (+)-abscisic acid 8'-hydroxylase [EC:1.14.13.93] | (RefSeq) hypothetical protein	http://www.genome.jp/dbget-bin/www_bget?pper:PRUPE_ppa005020mg	PREDICTED: abscisic acid 8'-hydroxylase 2
Pav_sc0001031.1_g310.1.br	Pav_sc0001031.1	1	0	1	58	39	33	0.0894471	0	0.108442	4.96181	4.16692	2.50457	0.0659629	3.87777	40.9453	0.724384	5.8208	4.3614e-12	1.5721e-10	UP	--	--	GO:0019028//GO:0019012//GO:0044423//GO:0005575	viral capsid//virion//virion part//cellular_component	--	--	no KO assigned | (RefSeq) hypothetical protein	http://www.genome.jp/dbget-bin/www_bget?pper:PRUPE_ppa011874mg	PREDICTED: heterogeneous nuclear ribonucleoprotein A3 homolog 2-like
Novel00003	Pav_co4000477.1	0	0	0	14	10	12	0	0	0	1.76149	1.57141	1.33949	0	1.55746	11.1795	0	Inf	3.3757e-05	0.0003716	UP	--	--	--	--	--	--	no KO assigned | (RefSeq) hypothetical protein	http://www.genome.jp/dbget-bin/www_bget?pper:PRUPE_ppa010939mg	--
Pav_sc0003241.1_g130.1.br	Pav_sc0003241.1	0	0	0	8	17	9	0	0	0	1.02951	2.73229	1.02752	0	1.59644	11.2581	0	Inf	0.0004814	0.0036936	UP	GO:0006511//GO:0044257//GO:0071704//GO:0009057//GO:0009987//GO:0044237//GO:0043632//GO:0051603//GO:0019538//GO:0043170//GO:0044265//GO:0019941//GO:1901575//GO:0030163//GO:0044238//GO:0032501//GO:0044767//GO:0044699//GO:0006508//GO:0008152//GO:0007275//GO:0032502//GO:0044260//GO:0044267//GO:0044707//GO:0044248//GO:0008150//GO:0009056	ubiquitin-dependent protein catabolic process//cellular protein catabolic process//organic substance metabolic process//macromolecule catabolic process//cellular process//cellular metabolic process//modification-dependent macromolecule catabolic process//proteolysis involved in cellular protein catabolic process//protein metabolic process//macromolecule metabolic process//cellular macromolecule c…	GO:0044424//GO:0044425//GO:0005622//GO:0005575//GO:0043227//GO:0016020//GO:0005623//GO:0031224//GO:0005634//GO:0044464//GO:0043229//GO:0043231//GO:0043226	intracellular part//membrane part//intracellular//cellular_component//membrane-bounded organelle//membrane//cell//intrinsic component of membrane//nucleus//cell part//intracellular organelle//intracellular membrane-bounded organelle//organelle	--	--	no KO assigned | (RefSeq) hypothetical protein	http://www.genome.jp/dbget-bin/www_bget?pper:PRUPE_ppb012433mg	-\-
Pav_sc0001671.1_g150.1.br	Pav_sc0001671.1	0	1	2	88	41	70	0	0.0366428	0.0924249	3.20817	1.8668	2.26402	0.0430226	2.44633	60.4998	1.1082	5.7706	5.3139e-17	3.1172e-15	UP	--	--	--	--	--	--	--	--	-\-
Novel00756	Pav_sc0001858.1	0	2	0	54	26	48	0	0.0807836	0	2.17007	1.30494	1.71131	0.0269279	1.72877	38.7869	0.673691	5.8473	6.7173e-14	2.926e-12	UP	GO:0008150//GO:0006259//GO:0008152//GO:0044260//GO:0055114//GO:0044699//GO:0044238//GO:0046483//GO:0006139//GO:0043170//GO:0006725//GO:0044237//GO:0009987//GO:0090304//GO:0034641//GO:0006807//GO:1901360//GO:0015074//GO:0071704//GO:0044710	biological_process//DNA metabolic process//metabolic process//cellular macromolecule metabolic process//oxidation-reduction process//single-organism process//primary metabolic process//heterocycle metabolic process//nucleobase-containing compound metabolic process//macromolecule metabolic process//cellular aromatic compound metabolic process//cellular metabolic process//cellular process//nucleic …	--	--	GO:0003674//GO:0003954//GO:0016651//GO:0003824//GO:0016655//GO:0050136//GO:0016491//GO:0008137	molecular_function//NADH dehydrogenase activity//oxidoreductase activity, acting on NAD(P)H//catalytic activity//oxidoreductase activity, acting on NAD(P)H, quinone or similar compound as acceptor//NADH dehydrogenase (quinone) activity//oxidoreductase activity//NADH dehydrogenase (ubiquinone) activity	--	--	--
Pav_sc0001545.1_g020.1.mk	Pav_sc0001545.1	0	0	0	10	15	8	0	0	0	0.298149	0.558551	0.211608	0	0.356103	10.8271	0	Inf	6.2932e-05	0.00064255	UP	GO:0044699//GO:0044249//GO:1901576//GO:0006260//GO:0051234//GO:0009401//GO:0046483//GO:0044238//GO:0006139//GO:0044765//GO:0034645//GO:0008643//GO:0006810//GO:0008150//GO:0006259//GO:0008152//GO:0044260//GO:1901360//GO:0071704//GO:0009059//GO:0051179//GO:0009058//GO:1902578//GO:0006725//GO:0043170//GO:0071702//GO:0044237//GO:0009987//GO:0090304//GO:0006807//GO:0034641	single-organism process//cellular biosynthetic process//organic substance biosynthetic process//DNA replication//establishment of localization//phosphoenolpyruvate-dependent sugar phosphotransferase system//heterocycle metabolic process//primary metabolic process//nucleobase-containing compound metabolic process//single-organism transport//cellular macromolecule biosynthetic process//carbohydrate…	--	--	GO:0000287//GO:0003824//GO:0003674//GO:0005488//GO:0046872//GO:0016838//GO:0043167//GO:0010333//GO:0016829//GO:0043169//GO:0016835	magnesium ion binding//catalytic activity//molecular_function//binding//metal ion binding//carbon-oxygen lyase activity, acting on phosphates//ion binding//terpene synthase activity//lyase activity//cation binding//carbon-oxygen lyase activity	K15086 (3S)-linalool synthase [EC:4.2.3.25] | (RefSeq) hypothetical protein	http://www.genome.jp/dbget-bin/www_bget?pper:PRUPE_ppa002670mg	linalool/nerolidol synthase
Pav_sc0009345.1_g010.1.br	Pav_sc0009345.1	3	1	5	196	164	205	0.092604	0.0296735	0.187115	5.78643	6.04696	5.36928	0.103131	5.73422	175.496	3.28135	5.741	2.1273e-46	6.3748e-44	UP	GO:0044767//GO:0044699//GO:0016043//GO:0008150//GO:0032989//GO:0048856//GO:0048869//GO:0032502//GO:0044763//GO:0009653//GO:0071840//GO:0000902//GO:0009987	single-organism developmental process//single-organism process//cellular component organization//biological_process//cellular component morphogenesis//anatomical structure development//cellular developmental process//developmental process//single-organism cellular process//anatomical structure morphogenesis//cellular component organization or biogenesis//cell morphogenesis//cellular process	--	--	--	--	no KO assigned | (RefSeq) hypothetical protein	http://www.genome.jp/dbget-bin/www_bget?pper:PRUPE_ppb019197mg	PREDICTED: putative ribonuclease H protein At1g65750
Pav_sc0000562.1_g080.1.br	Pav_sc0000562.1	0	0	0	8	12	14	0	0	0	0.382388	0.716364	0.593677	0	0.564143	10.6826	0	Inf	5.7244e-05	0.00059126	UP	GO:0044699//GO:0055114//GO:0008152//GO:0008150//GO:0044710	single-organism process//oxidation-reduction process//metabolic process//biological_process//single-organism metabolic process	--	--	GO:0020037//GO:0003824//GO:0005488//GO:0003674//GO:0005506//GO:0043167//GO:0046906//GO:0016705//GO:0046872//GO:0097159//GO:0016491//GO:0046914//GO:0043169//GO:1901363	heme binding//catalytic activity//binding//molecular_function//iron ion binding//ion binding//tetrapyrrole binding//oxidoreductase activity, acting on paired donors, with incorporation or reduction of molecular oxygen//metal ion binding//organic cyclic compound binding//oxidoreductase activity//transition metal ion binding//cation binding//heterocyclic compound binding	no KO assigned | (RefSeq) hypothetical protein	http://www.genome.jp/dbget-bin/www_bget?pper:PRUPE_ppa005190mg	PREDICTED: cytochrome P450 71A25-like
Pav_sc0000497.1_g270.1.mk	Pav_sc0000497.1	0	0	1	36	16	14	0	0	0.0435085	1.23564	0.685881	0.42631	0.0145028	0.782611	20.5636	0.385678	5.7365	1.8266e-05	0.00021634	UP	GO:0044763//GO:0044765//GO:0051179//GO:0044699//GO:0051234//GO:0009987//GO:0055085//GO:0006811//GO:0006812//GO:1902578//GO:0006810//GO:0008150	single-organism cellular process//single-organism transport//localization//single-organism process//establishment of localization//cellular process//transmembrane transport//ion transport//cation transport//single-organism localization//transport//biological_process	GO:0031224//GO:0044425//GO:0005575//GO:0016021//GO:0016020	intrinsic component of membrane//membrane part//cellular_component//integral component of membrane//membrane	GO:0005215//GO:0022857//GO:0022891//GO:0008324//GO:0003674//GO:0015075//GO:0022892	transporter activity//transmembrane transporter activity//substrate-specific transmembrane transporter activity//cation transmembrane transporter activity//molecular_function//ion transmembrane transporter activity//substrate-specific transporter activity	no KO assigned | (RefSeq) hypothetical protein	http://www.genome.jp/dbget-bin/www_bget?pper:PRUPE_ppa006520mg	PREDICTED: metal tolerance protein 10-like isoform X2
Pav_sc0000502.1_g250.1.mk	Pav_sc0000502.1	0	0	0	6	4	26	0	0	0	0.449448	0.37422	1.72787	0	0.850511	10.2284	0	Inf	0.0085408	0.039382	UP	GO:0009889//GO:0006355//GO:0019219//GO:0008152//GO:0009987//GO:0044237//GO:0051171//GO:0090304//GO:2001141//GO:0044260//GO:0065007//GO:0034641//GO:0006807//GO:0034645//GO:1901362//GO:0019438//GO:0034654//GO:0018130//GO:0008150//GO:0043170//GO:0019222//GO:2000112//GO:0006725//GO:0060255//GO:0044238//GO:0009059//GO:0010556//GO:0046483//GO:1903506//GO:0006139//GO:0031326//GO:0044271//GO:0051252//GO:…	regulation of biosynthetic process//regulation of transcription, DNA-templated//regulation of nucleobase-containing compound metabolic process//metabolic process//cellular process//cellular metabolic process//regulation of nitrogen compound metabolic process//nucleic acid metabolic process//regulation of RNA biosynthetic process//cellular macromolecule metabolic process//biological regulation//ce…	--	--	GO:0003674//GO:0001071//GO:0003700	molecular_function//nucleic acid binding transcription factor activity//transcription factor activity, sequence-specific DNA binding	no KO assigned | (RefSeq) hypothetical protein	http://www.genome.jp/dbget-bin/www_bget?pper:PRUPE_ppa018178mg	PREDICTED: ethylene-responsive transcription factor ERF022-like
Pav_sc0000207.1_g1080.1.mk	Pav_sc0000207.1	0	0	0	16	9	8	0	0	0	1.69651	1.19184	0.752548	0	1.21363	10.3318	0	Inf	7.8049e-05	0.00077432	UP	--	--	--	--	--	--	no KO assigned | (RefSeq) hypothetical protein	http://www.genome.jp/dbget-bin/www_bget?pper:PRUPE_ppa024197mg	hypothetical protein PRUPE_ppa024197mg
Pav_sc0003151.1_g010.1.mk	Pav_sc0003151.1	0	0	0	11	12	9	0	0	0	1.31099	1.78619	0.951606	0	1.34959	10.2484	0	Inf	9.4622e-05	0.00091801	UP	--	--	--	--	--	--	no KO assigned | (RefSeq) hypothetical protein	http://www.genome.jp/dbget-bin/www_bget?pper:PRUPE_ppa013902mg	-\-
Pav_sc0001988.1_g110.1.br	Pav_sc0001988.1	0	0	0	10	12	10	0	0	0	0.78013	1.1692	0.69211	0	0.880479	10.2159	0	Inf	9.5975e-05	0.00092882	UP	--	--	--	--	--	--	no KO assigned | (RefSeq) hypothetical protein	http://www.genome.jp/dbget-bin/www_bget?pper:PRUPE_ppa000638mg	PREDICTED: protein TIME FOR COFFEE isoform X1
Pav_sc0010414.1_g020.1.br	Pav_sc0010414.1	0	0	0	17	7	9	0	0	0	0.752826	0.387153	0.353587	0	0.497855	10.1341	0	Inf	8.528e-05	0.00083871	UP	GO:0034645//GO:0033554//GO:0007264//GO:0018130//GO:0008150//GO:0034654//GO:1901362//GO:0019438//GO:0023052//GO:0006725//GO:2000112//GO:0019222//GO:0006259//GO:0043170//GO:0006355//GO:0009889//GO:0035556//GO:0007154//GO:0006950//GO:0009987//GO:0008152//GO:0051171//GO:0044237//GO:0019219//GO:0050896//GO:0065007//GO:0044260//GO:2001141//GO:0090304//GO:0006807//GO:0051716//GO:0034641//GO:0016070//GO:…	cellular macromolecule biosynthetic process//cellular response to stress//small GTPase mediated signal transduction//heterocycle biosynthetic process//biological_process//nucleobase-containing compound biosynthetic process//organic cyclic compound biosynthetic process//aromatic compound biosynthetic process//signaling//cellular aromatic compound metabolic process//regulation of cellular macromole…	GO:0033646//GO:0005575//GO:0044215//GO:0042025//GO:0018995//GO:0033647//GO:0033648//GO:0044217//GO:0043656//GO:0033643//GO:0043657//GO:0044216	host intracellular part//cellular_component//other organism//host cell nucleus//host//host intracellular organelle//host intracellular membrane-bounded organelle//other organism part//intracellular region of host//host cell part//host cell//other organism cell	GO:0030554//GO:0035639//GO:0003674//GO:0016887//GO:0032561//GO:0005488//GO:0008134//GO:0032549//GO:0005515//GO:1901363//GO:0097367//GO:0032550//GO:0032559//GO:0016817//GO:0000166//GO:0005524//GO:0009378//GO:0003824//GO:0016787//GO:0004386//GO:0005525//GO:0017076//GO:0036094//GO:0097159//GO:0003677//GO:0032553//GO:0043168//GO:0032555//GO:0017111//GO:0003678//GO:0003676//GO:0016818//GO:0019001//GO:…	adenyl nucleotide binding//purine ribonucleoside triphosphate binding//molecular_function//ATPase activity//guanyl ribonucleotide binding//binding//transcription factor binding//ribonucleoside binding//protein binding//heterocyclic compound binding//carbohydrate derivative binding//purine ribonucleoside binding//adenyl ribonucleotide binding//hydrolase activity, acting on acid anhydrides//nucleot…	no KO assigned | (RefSeq) hypothetical protein	http://www.genome.jp/dbget-bin/www_bget?pper:PRUPE_ppa017078mg	PREDICTED: putative disease resistance RPP13-like protein 1
Pav_sc0000037.1_g200.1.mk	Pav_sc0000037.1	0	0	0	6	12	14	0	0	0	0.260844	0.651554	0.539966	0	0.484121	10.0857	0	Inf	0.00010162	0.00097704	UP	GO:0008152//GO:0006508//GO:0008150//GO:0043170//GO:0019538//GO:0044238//GO:0071704	metabolic process//proteolysis//biological_process//macromolecule metabolic process//protein metabolic process//primary metabolic process//organic substance metabolic process	--	--	GO:0004197//GO:0008233//GO:0008234//GO:0003674//GO:0004175//GO:0070011//GO:0016787//GO:0003824	cysteine-type endopeptidase activity//peptidase activity//cysteine-type peptidase activity//molecular_function//endopeptidase activity//peptidase activity, acting on L-amino acid peptides//hydrolase activity//catalytic activity	no KO assigned | (RefSeq) hypothetical protein	http://www.genome.jp/dbget-bin/www_bget?pper:PRUPE_ppa008267mg	PREDICTED: zingipain-2-like
Pav_sc0000677.1_g230.1.br	Pav_sc0000677.1	1	1	3	107	75	114	0.045108	0.0433624	0.164061	4.61618	4.04109	4.36327	0.0841771	4.34018	90.825	1.83259	5.6311	5.902e-28	7.3766e-26	UP	GO:0009058//GO:0016051//GO:0009059//GO:0044710//GO:0071704//GO:0000271//GO:0043170//GO:0044238//GO:1901576//GO:0044699//GO:0044723//GO:0005975//GO:0044711//GO:0005976//GO:0008152//GO:0008150	biosynthetic process//carbohydrate biosynthetic process//macromolecule biosynthetic process//single-organism metabolic process//organic substance metabolic process//polysaccharide biosynthetic process//macromolecule metabolic process//primary metabolic process//organic substance biosynthetic process//single-organism process//single-organism carbohydrate metabolic process//carbohydrate metabolic p…	GO:0005575//GO:0016020	cellular_component//membrane	--	--	no KO assigned | (RefSeq) hypothetical protein	http://www.genome.jp/dbget-bin/www_bget?pper:PRUPE_ppa019896mg	PREDICTED: ankyrin repeat-containing protein At3g12360-like
Pav_sc0001838.1_g020.1.mk	Pav_sc0001838.1	0	0	0	7	8	18	0	0	0	1.21144	1.72916	2.76367	0	1.90142	9.9237	0	Inf	9.3883e-05	0.00091284	UP	--	--	--	--	--	--	K01897 long-chain acyl-CoA synthetase [EC:6.2.1.3] | (RefSeq) hypothetical protein	http://www.genome.jp/dbget-bin/www_bget?pper:PRUPE_ppa002531mg	-\-
Novel00805	Pav_sc0002236.1	0	0	0	15	5	13	0	0	0	1.13302	0.471686	0.871156	0	0.825286	9.8388	0	Inf	9.7647e-05	0.00094207	UP	--	--	--	--	GO:0016757//GO:0016740//GO:0003824//GO:0003674	transferase activity, transferring glycosyl groups//transferase activity//catalytic activity//molecular_function	no KO assigned | (RefSeq) hypothetical protein	http://www.genome.jp/dbget-bin/www_bget?pper:PRUPE_ppa027206mg	--
Pav_sc0000584.1_g410.1.br	Pav_sc0000584.1	0	0	0	12	13	5	0	0	0	2.58112	3.49228	0.954123	0	2.34251	9.86428	0	Inf	0.00018094	0.0016165	UP	--	--	--	--	--	--	no KO assigned | (RefSeq) hypothetical protein	http://www.genome.jp/dbget-bin/www_bget?pper:PRUPE_ppa013650mg	PREDICTED: uncharacterized protein LOC103325965
Pav_sc0005078.1_g070.1.mk	Pav_sc0005078.1	0	0	0	19	8	4	0	0	0	1.47969	0.77812	0.276367	0	0.844726	9.78252	0	Inf	0.0018668	0.01151	UP	GO:0032502//GO:0048869//GO:0048856//GO:0008150//GO:0032989//GO:0016043//GO:0044699//GO:0044767//GO:0009987//GO:0000902//GO:0071840//GO:0009653//GO:0044763	developmental process//cellular developmental process//anatomical structure development//biological_process//cellular component morphogenesis//cellular component organization//single-organism process//single-organism developmental process//cellular process//cell morphogenesis//cellular component organization or biogenesis//anatomical structure morphogenesis//single-organism cellular process	--	--	--	--	K03283 heat shock 70kDa protein 1/8 | (RefSeq) hypothetical protein	http://www.genome.jp/dbget-bin/www_bget?pper:PRUPE_ppa004251mg	PREDICTED: heat shock cognate 70 kDa protein-like
Pav_sc0009541.1_g010.1.br	Pav_sc0009541.1	0	0	0	21	7	3	0	0	0	0.716977	0.298485	0.0908689	0	0.368777	9.73251	0	Inf	0.0083699	0.038788	UP	--	--	--	--	--	--	no KO assigned | (RefSeq) hypothetical protein	http://www.genome.jp/dbget-bin/www_bget?pper:PRUPE_ppa015624mg	PREDICTED: UPF0481 protein At3g47200-like
Novel00611	Pav_sc0001111.1	2	1	0	43	59	65	0.148984	0.0716095	0	3.06355	5.24985	4.10845	0.0735313	4.14062	52.5978	1.01426	5.6965	1.3796e-15	7.0894e-14	UP	--	--	--	--	--	--	--	--	--
Pav_sc0000085.1_g190.1.mk	Pav_sc0000085.1	0	0	0	10	2	22	0	0	0	0.31346	0.078298	0.611804	0	0.334521	9.59662	0	Inf	0.004023	0.021449	UP	GO:0019438//GO:1901362//GO:0006629//GO:0018130//GO:0006753//GO:0072522//GO:0006725//GO:0006779//GO:0006631//GO:1902578//GO:0006812//GO:0051186//GO:1901564//GO:0034641//GO:0046156//GO:0006807//GO:0009152//GO:0006793//GO:0032787//GO:0044237//GO:0009987//GO:0042168//GO:1901293//GO:1901360//GO:0044710//GO:0071704//GO:0009127//GO:0006189//GO:0033014//GO:0030001//GO:0042440//GO:0009156//GO:0044281//GO:…	aromatic compound biosynthetic process//organic cyclic compound biosynthetic process//lipid metabolic process//heterocycle biosynthetic process//nucleoside phosphate metabolic process//purine-containing compound biosynthetic process//cellular aromatic compound metabolic process//porphyrin-containing compound biosynthetic process//fatty acid metabolic process//single-organism localization//cation …	--	--	GO:0016628//GO:0050662//GO:0016616//GO:0016627//GO:0004616//GO:1901363//GO:0097159//GO:0016491//GO:1901265//GO:0016614//GO:0051287//GO:0003674//GO:0043115//GO:0005488//GO:0036094//GO:0003857//GO:0000166//GO:0003824//GO:0048037	oxidoreductase activity, acting on the CH-CH group of donors, NAD or NADP as acceptor//coenzyme binding//oxidoreductase activity, acting on the CH-OH group of donors, NAD or NADP as acceptor//oxidoreductase activity, acting on the CH-CH group of donors//phosphogluconate dehydrogenase (decarboxylating) activity//heterocyclic compound binding//organic cyclic compound binding//oxidoreductase activit…	K00083 cinnamyl-alcohol dehydrogenase [EC:1.1.1.195] | (RefSeq) hypothetical protein	http://www.genome.jp/dbget-bin/www_bget?pper:PRUPE_ppa007634mg	PREDICTED: probable cinnamyl alcohol dehydrogenase 6
Pav_co4061907.1_g010.1.mk	Pav_co4061907.1	1	1	0	45	48	12	0.0795085	0.0764317	0	3.42194	4.55868	0.809559	0.0519801	2.93006	34.9104	0.675551	5.6914	0.00033539	0.0027404	UP	--	--	--	--	--	--	no KO assigned | (RefSeq) hypothetical protein	http://www.genome.jp/dbget-bin/www_bget?pper:PRUPE_ppa007164mg	PREDICTED: transcription factor bHLH68
Pav_sc0000376.1_g630.1.mk	Pav_sc0000376.1	0	0	0	15	7	9	0	0	0	1.63658	0.953855	0.871156	0	1.15386	9.5372	0	Inf	0.00015149	0.0013837	UP	--	--	--	--	GO:0015002//GO:0015075//GO:0003674//GO:0008324//GO:0015078//GO:0022891//GO:0022892//GO:0016676//GO:0016491//GO:0005215//GO:0016675//GO:0003824//GO:0022857//GO:0004129//GO:0009055//GO:0022890//GO:0015077	heme-copper terminal oxidase activity//ion transmembrane transporter activity//molecular_function//cation transmembrane transporter activity//hydrogen ion transmembrane transporter activity//substrate-specific transmembrane transporter activity//substrate-specific transporter activity//oxidoreductase activity, acting on a heme group of donors, oxygen as acceptor//oxidoreductase activity//transpor…	no KO assigned | (RefSeq) hypothetical protein	http://www.genome.jp/dbget-bin/www_bget?pper:PRUPE_ppa013961mg	-\-
Pav_sc0000034.1_g450.1.br	Pav_sc0000034.1	0	0	0	11	9	10	0	0	0	0.544808	0.556714	0.439399	0	0.51364	9.3713	0	Inf	0.00019033	0.0016859	UP	--	--	--	--	--	--	no KO assigned | (RefSeq) hypothetical protein	http://www.genome.jp/dbget-bin/www_bget?pper:PRUPE_ppb020741mg	hypothetical protein
Pav_sc0000146.1_g390.1.mk	Pav_sc0000146.1	0	0	0	21	6	3	0	0	0	0.825553	0.294588	0.10463	0	0.408257	9.3515	0	Inf	0.012894	0.054462	FALSE	--	--	--	--	--	--	no KO assigned | (RefSeq) hypothetical protein	http://www.genome.jp/dbget-bin/www_bget?pper:PRUPE_ppa007155mg	PREDICTED: protein FANTASTIC FOUR 1-like
Pav_sc0000506.1_g070.1.br	Pav_sc0000506.1	3	3	5	196	163	244	0.269875	0.259431	0.545307	16.8633	17.5151	18.6245	0.358204	17.6676	185.486	3.95504	5.5515	2.5547e-47	7.9531e-45	UP	GO:0071704//GO:0043412//GO:0036211//GO:0016310//GO:0006796//GO:0044238//GO:0019538//GO:0043170//GO:0008150//GO:0006464//GO:0044267//GO:0044260//GO:0006468//GO:0044237//GO:0009987//GO:0008152//GO:0006793	organic substance metabolic process//macromolecule modification//protein modification process//phosphorylation//phosphate-containing compound metabolic process//primary metabolic process//protein metabolic process//macromolecule metabolic process//biological_process//cellular protein modification process//cellular protein metabolic process//cellular macromolecule metabolic process//protein phosph…	--	--	GO:0032553//GO:0043168//GO:0032555//GO:0017076//GO:0097159//GO:0036094//GO:0004672//GO:0003824//GO:0016773//GO:0016740//GO:0005524//GO:0000166//GO:0001883//GO:1901265//GO:0043167//GO:0001882//GO:0035639//GO:0003674//GO:0016772//GO:0030554//GO:0016301//GO:0097367//GO:0032559//GO:0032550//GO:0032549//GO:1901363//GO:0005488	ribonucleotide binding//anion binding//purine ribonucleotide binding//purine nucleotide binding//organic cyclic compound binding//small molecule binding//protein kinase activity//catalytic activity//phosphotransferase activity, alcohol group as acceptor//transferase activity//ATP binding//nucleotide binding//purine nucleoside binding//nucleoside phosphate binding//ion binding//nucleoside binding/…	no KO assigned | (RefSeq) hypothetical protein	http://www.genome.jp/dbget-bin/www_bget?pper:PRUPE_ppa000808mg	PREDICTED: probable LRR receptor-like serine/threonine-protein kinase RFK1 isoform X2
Pav_sc0007674.1_g070.1.mk	Pav_sc0007674.1	0	0	0	7	14	7	0	0	0	0.364691	0.910948	0.323544	0	0.533061	9.28481	0	Inf	0.00080422	0.0056939	UP	--	--	--	--	--	--	no KO assigned | (RefSeq) hypothetical protein	http://www.genome.jp/dbget-bin/www_bget?pper:PRUPE_ppa018485mg	PREDICTED: uncharacterized protein LOC103340015
Pav_sc0006359.1_g110.1.br	Pav_sc0006359.1	3	7	0	161	159	207	0.605488	1.35813	0	31.0782	38.3324	35.4494	0.65454	34.9533	163.677	3.37403	5.6002	7.8844e-43	2.0427e-40	UP	--	--	GO:0005575//GO:0016021//GO:0016020//GO:0044425//GO:0031224	cellular_component//integral component of membrane//membrane//membrane part//intrinsic component of membrane	--	--	no KO assigned | (RefSeq) hypothetical protein	http://www.genome.jp/dbget-bin/www_bget?pper:PRUPE_ppa013870mg	hypothetical protein PRUPE_ppa013870mg
Novel00220	Pav_sc0000308.1	0	0	0	8	12	8	0	0	0	0.100544	0.18836	0.0892002	0	0.126035	9.08714	0	Inf	0.00029539	0.002453	UP	--	--	--	--	--	--	no KO assigned | (RefSeq) hypothetical protein	http://www.genome.jp/dbget-bin/www_bget?pper:PRUPE_ppa017823mg	--
Pav_sc0000890.1_g140.1.br	Pav_sc0000890.1	0	0	0	13	9	6	0	0	0	0.315193	0.27253	0.12906	0	0.238928	8.90458	0	Inf	0.00031983	0.0026306	UP	GO:0006464//GO:1901135//GO:0006468//GO:0044260//GO:0044267//GO:0044255//GO:0005976//GO:0008152//GO:0044711//GO:0016071//GO:0044248//GO:0009056//GO:1903509//GO:0008150//GO:1901361//GO:0034645//GO:0006796//GO:0006139//GO:0044264//GO:0008653//GO:0044238//GO:0046483//GO:1901575//GO:0008610//GO:0019439//GO:1901137//GO:1901576//GO:0044249//GO:0009103//GO:0043412//GO:0005975//GO:0016310//GO:0034655//GO:…	cellular protein modification process//carbohydrate derivative metabolic process//protein phosphorylation//cellular macromolecule metabolic process//cellular protein metabolic process//cellular lipid metabolic process//polysaccharide metabolic process//metabolic process//single-organism biosynthetic process//mRNA metabolic process//cellular catabolic process//catabolic process//liposaccharide met…	GO:0005737//GO:0044464//GO:0005634//GO:0043231//GO:0043229//GO:0043226//GO:0005623//GO:0005622//GO:0005575//GO:0016020//GO:0043227//GO:0044424	cytoplasm//cell part//nucleus//intracellular membrane-bounded organelle//intracellular organelle//organelle//cell//intracellular//cellular_component//membrane//membrane-bounded organelle//intracellular part	GO:0016301//GO:0032559//GO:0097367//GO:0008408//GO:0005488//GO:0000175//GO:0003674//GO:0035639//GO:0016788//GO:0030554//GO:0001882//GO:0003676//GO:0043168//GO:0032553//GO:0036094//GO:0016796//GO:0016787//GO:0004527//GO:0003824//GO:0016773//GO:0004672//GO:0016896//GO:0005524//GO:0000166//GO:0016740//GO:0032550//GO:0004535//GO:0043169//GO:1901363//GO:0032549//GO:0030246//GO:0003723//GO:0016772//GO:…	kinase activity//adenyl ribonucleotide binding//carbohydrate derivative binding//3'-5' exonuclease activity//binding//3'-5'-exoribonuclease activity//molecular_function//purine ribonucleoside triphosphate binding//hydrolase activity, acting on ester bonds//adenyl nucleotide binding//nucleoside binding//nucleic acid binding//anion binding//ribonucleotide binding//small molecule binding//exonucleas…	K04733 interleukin-1 receptor-associated kinase 4 [EC:2.7.11.1] | (RefSeq) hypothetical protein	http://www.genome.jp/dbget-bin/www_bget?pper:PRUPE_ppa022890mg	PREDICTED: L-type lectin-domain containing receptor kinase IX.1-like
Pav_sc0012495.1_g010.1.br	Pav_sc0012495.1	0	0	0	17	5	7	0	0	0	4.10632	1.50839	1.50007	0	2.37159	8.84027	0	Inf	0.00064713	0.0047388	UP	--	--	--	--	--	--	--	--	-\-
Pav_sc0000598.1_g060.1.mk	Pav_sc0000598.1	0	0	0	10	7	12	0	0	0	1.32075	1.15467	1.40608	0	1.29383	8.84262	0	Inf	0.00028171	0.0023539	UP	--	--	--	--	--	--	no KO assigned | (RefSeq) hypothetical protein	http://www.genome.jp/dbget-bin/www_bget?pper:PRUPE_ppa008998mg	-\-
Pav_sc0001015.1_g180.1.mk	Pav_sc0001015.1	17	18	17	1822	411	495	0.372392	0.379039	0.451472	38.172	10.7542	9.20048	0.400967	19.3756	832.018	18.3777	5.5006	0.0014906	0.0095183	UP	GO:0006807//GO:0034641//GO:0090304//GO:2001141//GO:0006396//GO:0019219//GO:0009987//GO:0044237//GO:0006355//GO:0009889//GO:2000112//GO:0019222//GO:0006725//GO:0034660//GO:0043170//GO:0018130//GO:1901362//GO:0019438//GO:0009058//GO:0009059//GO:0010556//GO:0060255//GO:0071704//GO:0032774//GO:1901360//GO:0080090//GO:0006351//GO:0097659//GO:0016070//GO:0050789//GO:0065007//GO:0044260//GO:0008152//GO:…	nitrogen compound metabolic process//cellular nitrogen compound metabolic process//nucleic acid metabolic process//regulation of RNA biosynthetic process//RNA processing//regulation of nucleobase-containing compound metabolic process//cellular process//cellular metabolic process//regulation of transcription, DNA-templated//regulation of biosynthetic process//regulation of cellular macromolecule b…	GO:0005622//GO:0005575//GO:0043227//GO:0044424//GO:0005634//GO:0044464//GO:0043229//GO:0043231//GO:0043226//GO:0005623	intracellular//cellular_component//membrane-bounded organelle//intracellular part//nucleus//cell part//intracellular organelle//intracellular membrane-bounded organelle//organelle//cell	GO:0004549//GO:0004540//GO:0004519//GO:0004518//GO:0004526//GO:0016891//GO:0005515//GO:0016893//GO:0005488//GO:0003674//GO:0016788//GO:0004521//GO:0016787//GO:0003824	tRNA-specific ribonuclease activity//ribonuclease activity//endonuclease activity//nuclease activity//ribonuclease P activity//endoribonuclease activity, producing 5'-phosphomonoesters//protein binding//endonuclease activity, active with either ribo- or deoxyribonucleic acids and producing 5'-phosphomonoesters//binding//molecular_function//hydrolase activity, acting on ester bonds//endoribonuclea…	no KO assigned | (RefSeq) hypothetical protein	http://www.genome.jp/dbget-bin/www_bget?pper:PRUPE_ppa017326mg	PREDICTED: probable LRR receptor-like serine/threonine-protein kinase At1g56140
Pav_sc0002988.1_g030.1.br	Pav_sc0002988.1	0	0	0	10	9	9	0	0	0	0.62998	0.708122	0.503011	0	0.613704	8.80693	0	Inf	0.00033394	0.0027348	UP	GO:0009791//GO:0008150//GO:0044707//GO:0007275//GO:0044111//GO:0009877//GO:0048856//GO:0051704//GO:0032502//GO:0044699//GO:0044767//GO:0044419//GO:0032501//GO:0009886//GO:0009653//GO:0044403//GO:0009878	post-embryonic development//biological_process//single-multicellular organism process//multicellular organismal development//development involved in symbiotic interaction//nodulation//anatomical structure development//multi-organism process//developmental process//single-organism process//single-organism developmental process//interspecies interaction between organisms//multicellular organismal p…	--	--	GO:0003674//GO:0005488//GO:0043169//GO:0046872//GO:0043167	molecular_function//binding//cation binding//metal ion binding//ion binding	no KO assigned | (RefSeq) hypothetical protein	http://www.genome.jp/dbget-bin/www_bget?pper:PRUPE_ppa010510mg	hypothetical protein PRUPE_ppa010510mg
Pav_sc0000350.1_g170.1.mk	Pav_sc0000350.1	3	0	0	65	43	44	0.0834418	0	0	1.72911	1.42862	1.03841	0.0278139	1.39871	47.4836	1.01612	5.5463	8.1741e-16	4.2891e-14	UP	--	--	GO:0016020//GO:0005575	membrane//cellular_component	--	--	no KO assigned | (RefSeq) hypothetical protein	http://www.genome.jp/dbget-bin/www_bget?pper:PRUPE_ppa019498mg	PREDICTED: ABC transporter G family member 25
Pav_sc0009158.1_g010.1.mk	Pav_sc0009158.1	0	0	0	17	4	8	0	0	0	0.592959	0.174251	0.247556	0	0.338255	8.72516	0	Inf	0.00098755	0.0067758	UP	GO:0043170//GO:0019538//GO:0008150//GO:0044237//GO:0009987//GO:0008152//GO:0006793//GO:0006464//GO:0006468//GO:0044260//GO:0044267//GO:0016310//GO:0036211//GO:0071704//GO:0043412//GO:0044238//GO:0006796	macromolecule metabolic process//protein metabolic process//biological_process//cellular metabolic process//cellular process//metabolic process//phosphorus metabolic process//cellular protein modification process//protein phosphorylation//cellular macromolecule metabolic process//cellular protein metabolic process//phosphorylation//protein modification process//organic substance metabolic process…	--	--	GO:0003674//GO:0035639//GO:0030554//GO:0016772//GO:1901363//GO:0032549//GO:0005488//GO:0016301//GO:0032550//GO:0032559//GO:0097367//GO:0003824//GO:0016773//GO:0004672//GO:0005524//GO:0000166//GO:0016740//GO:0032555//GO:0043168//GO:0032553//GO:0036094//GO:0097159//GO:0017076//GO:0001882//GO:1901265//GO:0001883//GO:0043167	molecular_function//purine ribonucleoside triphosphate binding//adenyl nucleotide binding//transferase activity, transferring phosphorus-containing groups//heterocyclic compound binding//ribonucleoside binding//binding//kinase activity//purine ribonucleoside binding//adenyl ribonucleotide binding//carbohydrate derivative binding//catalytic activity//phosphotransferase activity, alcohol group as a…	no KO assigned | (RefSeq) hypothetical protein	http://www.genome.jp/dbget-bin/www_bget?pper:PRUPE_ppa022095mg	PREDICTED: LOW QUALITY PROTEIN: cysteine-rich receptor-like protein kinase 10
Pav_sc0001057.1_g430.1.br	Pav_sc0001057.1	0	0	2	57	25	21	0	0	0.0552409	1.242	0.680339	0.405951	0.0184136	0.776096	32.1217	0.771357	5.38	1.7903e-05	0.00021275	UP	--	--	GO:0005575//GO:0044423//GO:0019012//GO:0019028	cellular_component//virion part//virion//viral capsid	GO:0032549//GO:1901363//GO:0032550//GO:0016817//GO:0017076//GO:0097159//GO:0032555//GO:0017111//GO:0043167//GO:1901265//GO:0001883//GO:0030554//GO:0035639//GO:0003674//GO:0032561//GO:0005488//GO:0032559//GO:0097367//GO:0000166//GO:0005524//GO:0003824//GO:0016787//GO:0005525//GO:0036094//GO:0032553//GO:0043168//GO:0016818//GO:0019001//GO:0001882//GO:0016462//GO:0003924	ribonucleoside binding//heterocyclic compound binding//purine ribonucleoside binding//hydrolase activity, acting on acid anhydrides//purine nucleotide binding//organic cyclic compound binding//purine ribonucleotide binding//nucleoside-triphosphatase activity//ion binding//nucleoside phosphate binding//purine nucleoside binding//adenyl nucleotide binding//purine ribonucleoside triphosphate binding…	no KO assigned | (RefSeq) hypothetical protein	http://www.genome.jp/dbget-bin/www_bget?pper:PRUPE_ppa018625mg	PREDICTED: dynamin-related protein 4C-like
Pav_sc0003151.1_g020.1.mk	Pav_sc0003151.1	0	0	0	8	8	12	0	0	0	1.30926	1.63518	1.74231	0	1.56225	8.62671	0	Inf	0.00036205	0.0029142	UP	GO:0046483//GO:0046146//GO:0044271//GO:0042559//GO:0009058//GO:1901576//GO:0044249//GO:0006732//GO:1901360//GO:0071704//GO:0051188//GO:0044237//GO:0008152//GO:0009987//GO:0009108//GO:0006729//GO:0034641//GO:0006807//GO:1901566//GO:0051186//GO:1901564//GO:0019438//GO:1901362//GO:0008150//GO:0018130//GO:0042558//GO:0006725	heterocycle metabolic process//tetrahydrobiopterin metabolic process//cellular nitrogen compound biosynthetic process//pteridine-containing compound biosynthetic process//biosynthetic process//organic substance biosynthetic process//cellular biosynthetic process//coenzyme metabolic process//organic cyclic compound metabolic process//organic substance metabolic process//cofactor biosynthetic proce…	--	--	GO:0003824//GO:0008124//GO:0016835//GO:0003674//GO:0016829//GO:0016836	catalytic activity//4-alpha-hydroxytetrahydrobiopterin dehydratase activity//carbon-oxygen lyase activity//molecular_function//lyase activity//hydro-lyase activity	no KO assigned | (RefSeq) hypothetical protein	http://www.genome.jp/dbget-bin/www_bget?pper:PRUPE_ppa011514mg	PREDICTED: uncharacterized protein LOC103333127
Pav_sc0000848.1_g810.1.mk	Pav_sc0000848.1	0	0	0	8	10	9	0	0	0	0.905655	1.41388	0.903906	0	1.07448	8.59102	0	Inf	0.00042982	0.0033639	UP	--	--	--	--	--	--	no KO assigned | (RefSeq) hypothetical protein	http://www.genome.jp/dbget-bin/www_bget?pper:PRUPE_ppa026610mg	PREDICTED: desiccation-related protein PCC13-62-like
Pav_sc0000119.1_g720.1.mk	Pav_sc0000119.1	1	0	0	20	14	20	0.0162631	0	0	0.311085	0.271967	0.275986	0.00542104	0.286346	16.6216	0.338706	5.6169	1.6226e-06	2.482e-05	UP	GO:0044699//GO:0007017//GO:0008150//GO:0044763//GO:0006928//GO:0009987//GO:0007018	single-organism process//microtubule-based process//biological_process//single-organism cellular process//movement of cell or subcellular component//cellular process//microtubule-based movement	--	--	GO:0016818//GO:0001882//GO:0016462//GO:0000166//GO:0005524//GO:0008092//GO:0003824//GO:0004527//GO:0016787//GO:0036094//GO:0016796//GO:0032553//GO:0043168//GO:0008017//GO:0005488//GO:0032403//GO:0005515//GO:0004536//GO:0032559//GO:0097367//GO:0004529//GO:0030554//GO:0016788//GO:0003674//GO:0035639//GO:0017111//GO:0015631//GO:0003774//GO:0043167//GO:1901265//GO:0001883//GO:0016817//GO:0004518//GO:…	hydrolase activity, acting on acid anhydrides, in phosphorus-containing anhydrides//nucleoside binding//pyrophosphatase activity//nucleotide binding//ATP binding//cytoskeletal protein binding//catalytic activity//exonuclease activity//hydrolase activity//small molecule binding//exonuclease activity, active with either ribo- or deoxyribonucleic acids and producing 5'-phosphomonoesters//ribonucleot…	no KO assigned | (RefSeq) hypothetical protein	http://www.genome.jp/dbget-bin/www_bget?pper:PRUPE_ppa001068mg	PREDICTED: LOW QUALITY PROTEIN: kinesin-like protein Klp68D
Pav_sc0001471.1_g020.1.br	Pav_sc0001471.1	0	0	0	7	10	10	0	0	0	0.634913	1.1328	0.804682	0	0.857467	8.55847	0	Inf	0.00043602	0.0034018	UP	--	--	--	--	--	--	no KO assigned | (RefSeq) hypothetical protein	http://www.genome.jp/dbget-bin/www_bget?pper:PRUPE_ppa002181mg	-\-
Pav_sc0000062.1_g060.1.mk	Pav_sc0000062.1	0	0	1	18	11	26	0	0	0.161744	2.29676	1.75297	2.94323	0.0539145	2.33098	16.4771	0.385678	5.4169	1.4613e-06	2.2604e-05	UP	--	--	--	--	--	--	no KO assigned | (RefSeq) hypothetical protein	http://www.genome.jp/dbget-bin/www_bget?pper:PRUPE_ppa005064mg	PREDICTED: probable serine/threonine-protein kinase At5g41260
Novel00557	Pav_sc0000977.1	1	4	1	80	85	134	0.0708067	0.272266	0.0858429	5.41764	7.18915	8.05068	0.142972	6.88582	91.8949	2.07177	5.4711	2.0115e-27	2.4053e-25	UP	--	--	--	--	GO:0005515//GO:0005488//GO:0003674	protein binding//binding//molecular_function	no KO assigned | (RefSeq) hypothetical protein	http://www.genome.jp/dbget-bin/www_bget?pper:PRUPE_ppa000890mg	--
Pav_sc0000909.1_g290.1.br	Pav_sc0000909.1	1	1	0	35	20	46	0.0702799	0.0675601	0	2.35258	1.67898	2.7431	0.0459467	2.25822	30.2982	0.675551	5.487	6.2279e-11	1.9533e-09	UP	--	--	--	--	GO:0033926//GO:0003824//GO:0016787//GO:0003674//GO:0016798//GO:0004553	glycopeptide alpha-N-acetylgalactosaminidase activity//catalytic activity//hydrolase activity//molecular_function//hydrolase activity, acting on glycosyl bonds//hydrolase activity, hydrolyzing O-glycosyl compounds	no KO assigned | (RefSeq) hypothetical protein	http://www.genome.jp/dbget-bin/www_bget?pper:PRUPE_ppa002149mg	PREDICTED: alkaline/neutral invertase CINV2-like
Pav_sc0003352.1_g060.1.mk	Pav_sc0003352.1	2	2	0	83	47	66	0.0380718	0.0365985	0	1.51111	1.0687	1.06603	0.0248901	1.21528	60.2299	1.3511	5.4783	2.3807e-19	1.6448e-17	UP	--	--	--	--	GO:0005488//GO:0005515//GO:0003674	binding//protein binding//molecular_function	no KO assigned | (RefSeq) hypothetical protein	http://www.genome.jp/dbget-bin/www_bget?pper:PRUPE_ppa016609mg	PREDICTED: receptor-like protein 2
Pav_sc0000102.1_g420.1.mk	Pav_sc0000102.1	0	0	0	10	10	6	0	0	0	0.34428	0.429982	0.183262	0	0.319175	8.39022	0	Inf	0.00055003	0.0041169	UP	GO:0044710//GO:0044699//GO:0055114//GO:0008152//GO:0008150	single-organism metabolic process//single-organism process//oxidation-reduction process//metabolic process//biological_process	--	--	GO:0016491//GO:0003824//GO:0003674	oxidoreductase activity//catalytic activity//molecular_function	no KO assigned | (RefSeq) hypothetical protein	http://www.genome.jp/dbget-bin/www_bget?pper:PRUPE_ppa019644mg	PREDICTED: gibberellin 3-beta-dioxygenase 4
Novel00069	Pav_sc0000051.1	0	0	0	11	1	17	0	0	0	0.781234	0.0887008	1.07114	0	0.647025	8.18453	0	Inf	0.0044482	0.023375	UP	GO:1901362//GO:0006629//GO:1901360//GO:0071704//GO:0044710//GO:0009058//GO:0008150//GO:0006694//GO:0008152//GO:0044711//GO:0055114//GO:0008202//GO:0044699//GO:1901576//GO:0044238//GO:0008610	organic cyclic compound biosynthetic process//lipid metabolic process//organic cyclic compound metabolic process//organic substance metabolic process//single-organism metabolic process//biosynthetic process//biological_process//steroid biosynthetic process//metabolic process//single-organism biosynthetic process//oxidation-reduction process//steroid metabolic process//single-organism process//org…	--	--	GO:0050662//GO:0016616//GO:0016491//GO:0016614//GO:0016229//GO:0033764//GO:0003854//GO:0003674//GO:0005488//GO:0003824//GO:0048037	coenzyme binding//oxidoreductase activity, acting on the CH-OH group of donors, NAD or NADP as acceptor//oxidoreductase activity//oxidoreductase activity, acting on CH-OH group of donors//steroid dehydrogenase activity//steroid dehydrogenase activity, acting on the CH-OH group of donors, NAD or NADP as acceptor//3-beta-hydroxy-delta5-steroid dehydrogenase activity//molecular_function//binding//ca…	no KO assigned | (RefSeq) hypothetical protein	http://www.genome.jp/dbget-bin/www_bget?pper:PRUPE_ppa010133mg	--
Pav_sc0000048.1_g250.1.br	Pav_sc0000048.1	0	0	0	10	5	12	0	0	0	0.501884	0.313409	0.534309	0	0.449867	8.08059	0	Inf	0.00054146	0.0040674	UP	--	--	--	--	--	--	K17604 zinc finger SWIM domain-containing protein 3 | (RefSeq) hypothetical protein	http://www.genome.jp/dbget-bin/www_bget?pper:PRUPE_ppa018163mg	PREDICTED: protein FAR1-RELATED SEQUENCE 5-like
Pav_sc0004971.1_g080.1.mk	Pav_sc0004971.1	12	5	0	387	223	154	0.237228	0.0950197	0	7.31713	5.26591	2.5832	0.110749	5.05541	241.421	5.7487	5.3922	3.4065e-08	7.2416e-07	UP	GO:0008150//GO:0006810//GO:1902578//GO:0055085//GO:0009987//GO:0051234//GO:0044699//GO:0044765//GO:0051179//GO:0044763	biological_process//transport//single-organism localization//transmembrane transport//cellular process//establishment of localization//single-organism process//single-organism transport//localization//single-organism cellular process	GO:0016020//GO:0016021//GO:0044459//GO:0031226//GO:0005575//GO:0044464//GO:0044425//GO:0005887//GO:0071944//GO:0031224//GO:0005886//GO:0005623	membrane//integral component of membrane//plasma membrane part//intrinsic component of plasma membrane//cellular_component//cell part//membrane part//integral component of plasma membrane//cell periphery//intrinsic component of membrane//plasma membrane//cell	GO:0003674//GO:0005215	molecular_function//transporter activity	K14638 solute carrier family 15 (peptide/histidine transporter), member 3/4 | (RefSeq) hypothetical protein	http://www.genome.jp/dbget-bin/www_bget?pper:PRUPE_ppa003158mg	PREDICTED: protein NRT1/ PTR FAMILY 7.3
Pav_sc0000719.1_g750.1.mk	Pav_sc0000719.1	0	0	0	15	6	5	0	0	0	1.42942	0.714097	0.422713	0	0.855409	8.09255	0	Inf	0.00062732	0.0046107	UP	--	--	GO:0005622//GO:0005575//GO:0005882//GO:0044422//GO:0043228//GO:0032991//GO:0044424//GO:0044446//GO:0005856//GO:0043232//GO:0044430//GO:0044464//GO:0043229//GO:0043226//GO:0005623//GO:0043234//GO:0045111	intracellular//cellular_component//intermediate filament//organelle part//non-membrane-bounded organelle//macromolecular complex//intracellular part//intracellular organelle part//cytoskeleton//intracellular non-membrane-bounded organelle//cytoskeletal part//cell part//intracellular organelle//organelle//cell//protein complex//intermediate filament cytoskeleton	GO:0005200//GO:0003674//GO:0005198	structural constituent of cytoskeleton//molecular_function//structural molecule activity	no KO assigned | (RefSeq) hypothetical protein	http://www.genome.jp/dbget-bin/www_bget?pper:PRUPE_ppa018865mg	PREDICTED: mediator of RNA polymerase II transcription subunit 15a-like isoform X2
Pav_sc0001503.1_g060.1.br	Pav_sc0001503.1	0	0	0	9	13	2	0	0	0	0.129922	0.234381	0.0256141	0	0.129972	8.17117	0	Inf	0.0091053	0.041405	UP	--	--	--	--	GO:0003674//GO:0005488//GO:0005515	molecular_function//binding//protein binding	no KO assigned | (RefSeq) hypothetical protein	http://www.genome.jp/dbget-bin/www_bget?pper:PRUPE_ppa015767mg	PREDICTED: receptor-like protein 12
Pav_sc0009122.1_g010.1.mk	Pav_sc0009122.1	0	1	0	20	16	14	0	0.0286981	0	0.571044	0.570556	0.35463	0.00956604	0.498743	15.7882	0.336845	5.5506	4.0648e-06	5.6449e-05	UP	GO:0019438//GO:1901362//GO:0018130//GO:0043170//GO:2000112//GO:0019222//GO:0006725//GO:0009889//GO:0006355//GO:0019219//GO:0044237//GO:0009987//GO:0090304//GO:2001141//GO:0034641//GO:0006807//GO:0050789//GO:0097659//GO:0016070//GO:0006351//GO:0080090//GO:1901360//GO:0071704//GO:0032774//GO:0060255//GO:0009059//GO:0010556//GO:0009058//GO:0034645//GO:0034654//GO:0008150//GO:0051171//GO:0008152//GO:…	aromatic compound biosynthetic process//organic cyclic compound biosynthetic process//heterocycle biosynthetic process//macromolecule metabolic process//regulation of cellular macromolecule biosynthetic process//regulation of metabolic process//cellular aromatic compound metabolic process//regulation of biosynthetic process//regulation of transcription, DNA-templated//regulation of nucleobase-con…	GO:0043227//GO:0005575//GO:0005622//GO:0044424//GO:0043226//GO:0043231//GO:0043229//GO:0044464//GO:0005634//GO:0005623	membrane-bounded organelle//cellular_component//intracellular//intracellular part//organelle//intracellular membrane-bounded organelle//intracellular organelle//cell part//nucleus//cell	GO:0043169//GO:0046914//GO:0046872//GO:0000981//GO:0043167//GO:0003674//GO:0005488//GO:0008270//GO:0005515//GO:0001071//GO:0003700	cation binding//transition metal ion binding//metal ion binding//RNA polymerase II transcription factor activity, sequence-specific DNA binding//ion binding//molecular_function//binding//zinc ion binding//protein binding//nucleic acid binding transcription factor activity//transcription factor activity, sequence-specific DNA binding	no KO assigned | (RefSeq) hypothetical protein	http://www.genome.jp/dbget-bin/www_bget?pper:PRUPE_ppa019509mg	PREDICTED: uncharacterized protein LOC103321024
Pav_co4019059.1_g010.1.mk	Pav_co4019059.1	0	0	0	15	3	9	0	0	0	1.42043	0.354803	0.756098	0	0.843776	8.01313	0	Inf	0.00082339	0.0058064	UP	--	--	GO:0043231//GO:1902494//GO:0043229//GO:0005575//GO:0044464//GO:0005622//GO:0005634//GO:0005680//GO:0043226//GO:0044422//GO:0000152//GO:0043227//GO:0000151//GO:0032991//GO:0044446//GO:0005623//GO:0043234//GO:0031461//GO:0044424//GO:0044428//GO:1990234	intracellular membrane-bounded organelle//catalytic complex//intracellular organelle//cellular_component//cell part//intracellular//nucleus//anaphase-promoting complex//organelle//organelle part//nuclear ubiquitin ligase complex//membrane-bounded organelle//ubiquitin ligase complex//macromolecular complex//intracellular organelle part//cell//protein complex//cullin-RING ubiquitin ligase complex//…	GO:0043169//GO:0019787//GO:0008270//GO:0005488//GO:1901363//GO:0005515//GO:0061630//GO:0061659//GO:0003723//GO:0003674//GO:0043167//GO:0003676//GO:0097159//GO:0046872//GO:0016740//GO:0046914//GO:0004842//GO:0003824	cation binding//ubiquitin-like protein transferase activity//zinc ion binding//binding//heterocyclic compound binding//protein binding//ubiquitin protein ligase activity//ubiquitin-like protein ligase activity//RNA binding//molecular_function//ion binding//nucleic acid binding//organic cyclic compound binding//metal ion binding//transferase activity//transition metal ion binding//ubiquitin-protei…	no KO assigned | (RefSeq) hypothetical protein	http://www.genome.jp/dbget-bin/www_bget?pper:PRUPEppa019102m2g	PREDICTED: RING-H2 finger protein ATL20-like
Pav_sc0000669.1_g040.1.br	Pav_sc0000669.1	14	5	7	453	277	516	0.433001	0.148659	0.262476	13.4	10.2335	13.5414	0.281379	12.3917	377.953	9.12586	5.3721	1.1659e-63	6.7438e-61	UP	GO:0006468//GO:0044260//GO:0044267//GO:0006464//GO:0008152//GO:0008150//GO:0006796//GO:0044238//GO:0043412//GO:0016310//GO:0006793//GO:0044237//GO:0009987//GO:0043170//GO:0019538//GO:0071704//GO:0036211	protein phosphorylation//cellular macromolecule metabolic process//cellular protein metabolic process//cellular protein modification process//metabolic process//biological_process//phosphate-containing compound metabolic process//primary metabolic process//macromolecule modification//phosphorylation//phosphorus metabolic process//cellular metabolic process//cellular process//macromolecule metabol…	--	--	GO:0097367//GO:0032559//GO:0016301//GO:0005488//GO:0030554//GO:0003674//GO:0035639//GO:0001882//GO:0036094//GO:0001871//GO:0043168//GO:0032553//GO:0005524//GO:0000166//GO:0016740//GO:0003824//GO:0016773//GO:0004672//GO:0032550//GO:0030246//GO:1901363//GO:0032549//GO:0030247//GO:0016772//GO:0001883//GO:1901265//GO:0043167//GO:0097159//GO:0017076//GO:0032555	carbohydrate derivative binding//adenyl ribonucleotide binding//kinase activity//binding//adenyl nucleotide binding//molecular_function//purine ribonucleoside triphosphate binding//nucleoside binding//small molecule binding//pattern binding//anion binding//ribonucleotide binding//ATP binding//nucleotide binding//transferase activity//catalytic activity//phosphotransferase activity, alcohol group …	K04733 interleukin-1 receptor-associated kinase 4 [EC:2.7.11.1] | (RefSeq) hypothetical protein	http://www.genome.jp/dbget-bin/www_bget?pper:PRUPE_ppa003241mg	PREDICTED: probable receptor-like protein kinase At1g67000
Pav_sc0000893.1_g980.1.mk	Pav_sc0000893.1	0	0	0	18	2	7	0	0	0	0.323153	0.0448439	0.111491	0	0.159829	7.99568	0	Inf	0.014478	0.059726	FALSE	GO:0043412//GO:0016310//GO:0006796//GO:0044238//GO:0044419//GO:1901575//GO:0016032//GO:0044248//GO:0009056//GO:0008150//GO:0044764//GO:0006464//GO:0051704//GO:0006468//GO:0044267//GO:0044260//GO:0008152//GO:0019076//GO:0032801//GO:0019058//GO:0071704//GO:0036211//GO:0043170//GO:0019538//GO:0009987//GO:0044237//GO:0009057//GO:0043112//GO:0006793//GO:0044403	macromolecule modification//phosphorylation//phosphate-containing compound metabolic process//primary metabolic process//interspecies interaction between organisms//organic substance catabolic process//viral process//cellular catabolic process//catabolic process//biological_process//multi-organism cellular process//cellular protein modification process//multi-organism process//protein phosphoryla…	GO:0033643//GO:0043657//GO:0044218//GO:0018995//GO:0044217//GO:0044216//GO:0044215//GO:0044279//GO:0033644//GO:0005575	host cell part//host cell//other organism cell membrane//host//other organism part//other organism cell//other organism//other organism membrane//host cell membrane//cellular_component	GO:0043168//GO:0032553//GO:0036094//GO:0022857//GO:0022803//GO:0016773//GO:0003824//GO:0004672//GO:0000166//GO:0005524//GO:0016740//GO:0001882//GO:0015267//GO:0022838//GO:0022892//GO:0008324//GO:0035639//GO:0015075//GO:0003674//GO:0030554//GO:0016301//GO:0032559//GO:0097367//GO:0005515//GO:0005488//GO:0032555//GO:0017076//GO:0097159//GO:0005215//GO:0043167//GO:1901265//GO:0001883//GO:0022891//GO:…	anion binding//ribonucleotide binding//small molecule binding//transmembrane transporter activity//passive transmembrane transporter activity//phosphotransferase activity, alcohol group as acceptor//catalytic activity//protein kinase activity//nucleotide binding//ATP binding//transferase activity//nucleoside binding//channel activity//substrate-specific channel activity//substrate-specific transp…	--	--	PREDICTED: serine/threonine-protein kinase BRI1-like 2
Pav_sc0001057.1_g490.1.br	Pav_sc0001057.1	0	2	0	49	24	19	0	0.0429318	0	1.04648	0.640155	0.359995	0.0143106	0.682211	28.8212	0.673691	5.4189	7.3452e-06	9.6764e-05	UP	--	--	GO:0019028//GO:0019012//GO:0005575//GO:0044423	viral capsid//virion//cellular_component//virion part	GO:0097367//GO:0032559//GO:0005488//GO:0032561//GO:0003674//GO:0035639//GO:0030554//GO:0003924//GO:0016462//GO:0001882//GO:0019001//GO:0016818//GO:0032553//GO:0043168//GO:0016787//GO:0036094//GO:0005525//GO:0003824//GO:0005524//GO:0000166//GO:0032550//GO:0032549//GO:1901363//GO:0001883//GO:1901265//GO:0043167//GO:0017111//GO:0032555//GO:0097159//GO:0017076//GO:0016817	carbohydrate derivative binding//adenyl ribonucleotide binding//binding//guanyl ribonucleotide binding//molecular_function//purine ribonucleoside triphosphate binding//adenyl nucleotide binding//GTPase activity//pyrophosphatase activity//nucleoside binding//guanyl nucleotide binding//hydrolase activity, acting on acid anhydrides, in phosphorus-containing anhydrides//ribonucleotide binding//anion …	no KO assigned | (RefSeq) hypothetical protein	http://www.genome.jp/dbget-bin/www_bget?pper:PRUPE_ppa018625mg	PREDICTED: dynamin-related protein 4C-like
Pav_sc0000095.1_g1080.1.mk	Pav_sc0000095.1	45	71	24	2505	1672	2321	1.85937	2.82015	1.20225	98.9936	82.5229	81.3735	1.96059	87.63	2001.88	48.4141	5.3698	8.9739e-129	3.1885e-125	UP	--	--	--	--	--	--	K09840 9-cis-epoxycarotenoid dioxygenase [EC:1.13.11.51] | (RefSeq) hypothetical protein	http://www.genome.jp/dbget-bin/www_bget?pper:PRUPE_ppa002804mg	9-cis-epoxycarotenoid dioxygenase
Pav_sc0001275.1_g320.1.mk	Pav_sc0001275.1	0	0	0	6	7	13	0	0	0	1.01505	1.47901	1.95113	0	1.48173	7.91468	0	Inf	0.00068005	0.0049385	UP	--	--	--	--	--	--	no KO assigned | (RefSeq) hypothetical protein	http://www.genome.jp/dbget-bin/www_bget?pper:PRUPE_ppb022522mg	-\-
Pav_co4027591.1_g010.1.br	Pav_co4027591.1	0	0	0	4	12	8	0	0	0	0.987313	3.69926	1.75183	0	2.14613	7.8933	0	Inf	0.0019419	0.011873	UP	--	--	--	--	--	--	--	--	-\-
Pav_sc0006100.1_g030.1.mk	Pav_sc0006100.1	0	0	2	30	25	37	0	0	0.101072	1.19602	1.24479	1.30866	0.0336906	1.24982	28.3178	0.771357	5.1982	4.3558e-10	1.2269e-08	UP	GO:0008150//GO:0008152	biological_process//metabolic process	--	--	GO:0003824//GO:0003674//GO:0016829	catalytic activity//molecular_function//lyase activity	no KO assigned | (RefSeq) hypothetical protein	http://www.genome.jp/dbget-bin/www_bget?pper:PRUPE_ppa016761mg	KHG/KDPG aldolase
Pav_sc0001242.1_g010.1.br	Pav_sc0001242.1	0	1	0	11	14	24	0	0.0331632	0	0.36294	0.576911	0.702525	0.0110544	0.547459	14.9991	0.336845	5.4766	6.4301e-06	8.5432e-05	UP	--	--	--	--	GO:0097367//GO:0032559//GO:0005515//GO:0005488//GO:0003674//GO:0030554//GO:0043531//GO:0001882//GO:0032553//GO:0043168//GO:0036094//GO:0000166//GO:0032550//GO:0032549//GO:1901363//GO:0043167//GO:0001883//GO:1901265//GO:0032555//GO:0017076//GO:0097159	carbohydrate derivative binding//adenyl ribonucleotide binding//protein binding//binding//molecular_function//adenyl nucleotide binding//ADP binding//nucleoside binding//ribonucleotide binding//anion binding//small molecule binding//nucleotide binding//purine ribonucleoside binding//ribonucleoside binding//heterocyclic compound binding//ion binding//purine nucleoside binding//nucleoside phosphate…	no KO assigned | (RefSeq) hypothetical protein	http://www.genome.jp/dbget-bin/www_bget?pper:PRUPE_ppa024835mg	PREDICTED: probable disease resistance protein At5g66900
Pav_sc0000091.1_g370.1.br	Pav_sc0000091.1	1	0	0	18	9	23	0.16064	0	0	2.76548	1.72695	3.13498	0.0535466	2.54247	14.9173	0.338706	5.4608	5.7508e-06	7.7274e-05	UP	--	--	--	--	--	--	no KO assigned | (RefSeq) hypothetical protein	http://www.genome.jp/dbget-bin/www_bget?pper:PRUPE_ppb010572mg	hypothetical protein PRUPE_ppb010572mg
Pav_sc0000766.1_g250.1.mk	Pav_sc0000766.1	0	0	0	13	5	7	0	0	0	0.363594	0.174655	0.173692	0	0.237314	7.64643	0	Inf	0.00089589	0.0062311	UP	--	--	--	--	GO:0003674//GO:0016818//GO:0003924//GO:0016462//GO:0016787//GO:0003824//GO:0017111//GO:0016817	molecular_function//hydrolase activity, acting on acid anhydrides, in phosphorus-containing anhydrides//GTPase activity//pyrophosphatase activity//hydrolase activity//catalytic activity//nucleoside-triphosphatase activity//hydrolase activity, acting on acid anhydrides	K07374 tubulin alpha | (RefSeq) hypothetical protein	http://www.genome.jp/dbget-bin/www_bget?pper:PRUPE_ppa005626mg	PREDICTED: tubulin alpha-2 chain-like
Pav_sc0002154.1_g130.1.br	Pav_sc0002154.1	1	1	0	43	27	17	0.0739093	0.0710491	0	3.03958	2.38368	1.06611	0.0483195	2.16312	27.6417	0.675551	5.3546	2.1161e-06	3.1499e-05	UP	GO:0008152//GO:0006464//GO:0044260//GO:0044267//GO:0006468//GO:0008150//GO:0044238//GO:0006796//GO:0016310//GO:0043412//GO:0044237//GO:0009987//GO:0006793//GO:0019538//GO:0043170//GO:0036211//GO:0071704	metabolic process//cellular protein modification process//cellular macromolecule metabolic process//cellular protein metabolic process//protein phosphorylation//biological_process//primary metabolic process//phosphate-containing compound metabolic process//phosphorylation//macromolecule modification//cellular metabolic process//cellular process//phosphorus metabolic process//protein metabolic pro…	--	--	GO:0005488//GO:0016301//GO:0097367//GO:0032559//GO:0003674//GO:0035639//GO:0030554//GO:0001882//GO:0004672//GO:0003824//GO:0016773//GO:0016740//GO:0005524//GO:0000166//GO:0032553//GO:0043168//GO:0036094//GO:0032549//GO:1901363//GO:0032550//GO:0016772//GO:0001883//GO:1901265//GO:0043167//GO:0032555//GO:0097159//GO:0017076	binding//kinase activity//carbohydrate derivative binding//adenyl ribonucleotide binding//molecular_function//purine ribonucleoside triphosphate binding//adenyl nucleotide binding//nucleoside binding//protein kinase activity//catalytic activity//phosphotransferase activity, alcohol group as acceptor//transferase activity//ATP binding//nucleotide binding//ribonucleotide binding//anion binding//sma…	no KO assigned | (RefSeq) hypothetical protein	http://www.genome.jp/dbget-bin/www_bget?pper:PRUPE_ppa000916mg	PREDICTED: receptor protein kinase CLAVATA1
Pav_sc0001846.1_g030.1.mk	Pav_sc0001846.1	0	0	0	7	4	15	0	0	0	0.411166	0.293439	0.781662	0	0.495422	7.60191	0	Inf	0.00078699	0.0055926	UP	GO:0044699//GO:0007017//GO:0008150//GO:0044763//GO:0009987	single-organism process//microtubule-based process//biological_process//single-organism cellular process//cellular process	GO:0043234//GO:0005623//GO:0043226//GO:0044464//GO:0043229//GO:0044430//GO:0043232//GO:0044424//GO:0005856//GO:0044446//GO:0032991//GO:0044422//GO:0043228//GO:0005875//GO:0005622//GO:0005575//GO:0015630	protein complex//cell//organelle//cell part//intracellular organelle//cytoskeletal part//intracellular non-membrane-bounded organelle//intracellular part//cytoskeleton//intracellular organelle part//macromolecular complex//organelle part//non-membrane-bounded organelle//microtubule associated complex//intracellular//cellular_component//microtubule cytoskeleton	--	--	K10418 dynein light chain LC8-type | (RefSeq) hypothetical protein	http://www.genome.jp/dbget-bin/www_bget?pper:PRUPE_ppa013659mg	PREDICTED: dynein light chain LC6, flagellar outer arm
Pav_sc0000381.1_g230.1.mk	Pav_sc0000381.1	1	0	0	14	20	12	0.0360245	0	0	0.48236	0.860621	0.366803	0.0120082	0.569928	14.9897	0.338706	5.4678	1.6045e-05	0.00019288	UP	GO:0050794//GO:0071704//GO:0032774//GO:0031323//GO:1901576//GO:0044249//GO:0080090//GO:1901360//GO:0006351//GO:0010468//GO:0010467//GO:0050789//GO:0097659//GO:0016070//GO:0009058//GO:0031326//GO:0006139//GO:0051252//GO:0044271//GO:0009059//GO:0044238//GO:0010556//GO:0046483//GO:1903506//GO:0060255//GO:0043170//GO:2000112//GO:0019222//GO:0006725//GO:0019438//GO:1901362//GO:0034654//GO:0008150//GO:…	regulation of cellular process//organic substance metabolic process//RNA biosynthetic process//regulation of cellular metabolic process//organic substance biosynthetic process//cellular biosynthetic process//regulation of primary metabolic process//organic cyclic compound metabolic process//transcription, DNA-templated//regulation of gene expression//gene expression//regulation of biological proc…	--	--	GO:0003700//GO:0001071//GO:0003674	transcription factor activity, sequence-specific DNA binding//nucleic acid binding transcription factor activity//molecular_function	no KO assigned | (RefSeq) hypothetical protein	http://www.genome.jp/dbget-bin/www_bget?pper:PRUPE_ppa010345mg	PREDICTED: ethylene-responsive transcription factor ERF062
Pav_sc0008697.1_g010.1.mk	Pav_sc0008697.1	0	0	0	14	4	7	0	0	0	0.336548	0.120093	0.149288	0	0.201976	7.56387	0	Inf	0.00093048	0.0064465	UP	--	--	--	--	GO:1901265//GO:0001883//GO:0043167//GO:0017076//GO:0097159//GO:0032555//GO:0032550//GO:0032549//GO:1901363//GO:0043531//GO:0001882//GO:0036094//GO:0032553//GO:0043168//GO:0000166//GO:0032559//GO:0097367//GO:0005488//GO:0030554//GO:0003674	nucleoside phosphate binding//purine nucleoside binding//ion binding//purine nucleotide binding//organic cyclic compound binding//purine ribonucleotide binding//purine ribonucleoside binding//ribonucleoside binding//heterocyclic compound binding//ADP binding//nucleoside binding//small molecule binding//ribonucleotide binding//anion binding//nucleotide binding//adenyl ribonucleotide binding//carbo…	no KO assigned | (RefSeq) hypothetical protein	http://www.genome.jp/dbget-bin/www_bget?pper:PRUPE_ppa021797mg	PREDICTED: putative disease resistance protein At1g50180
Pav_sc0000038.1_g350.1.mk	Pav_sc0000038.1	0	1	1	29	28	31	0	0.0546335	0.0689016	1.57631	1.90082	1.49491	0.0411784	1.65735	27.567	0.722524	5.2538	1.0258e-09	2.7229e-08	UP	GO:0031323//GO:0044249//GO:1901576//GO:0050794//GO:0010468//GO:0010467//GO:0031326//GO:0006139//GO:0051252//GO:0044271//GO:0016043//GO:0044238//GO:0046483//GO:1903506//GO:0034654//GO:0008150//GO:0034645//GO:0065007//GO:0044260//GO:0006996//GO:0051171//GO:0008152//GO:0080090//GO:1901360//GO:0071704//GO:0032774//GO:0050789//GO:0097659//GO:0016070//GO:0006351//GO:0007010//GO:0009058//GO:0060255//GO:…	regulation of cellular metabolic process//cellular biosynthetic process//organic substance biosynthetic process//regulation of cellular process//regulation of gene expression//gene expression//regulation of cellular biosynthetic process//nucleobase-containing compound metabolic process//regulation of RNA metabolic process//cellular nitrogen compound biosynthetic process//cellular component organi…	--	--	GO:0008092//GO:0003700//GO:0001071//GO:0003674//GO:0003779//GO:0005488//GO:0005515	cytoskeletal protein binding//transcription factor activity, sequence-specific DNA binding//nucleic acid binding transcription factor activity//molecular_function//actin binding//binding//protein binding	no KO assigned | (RefSeq) hypothetical protein	http://www.genome.jp/dbget-bin/www_bget?pper:PRUPE_ppa009812mg	PREDICTED: ethylene-responsive transcription factor ERF034
Pav_sc0000669.1_g050.1.mk	Pav_sc0000669.1	1	0	0	15	5	31	0.021734	0	0	0.311801	0.129806	0.571684	0.00724468	0.337764	14.6251	0.338706	5.4323	0.0008316	0.0058577	UP	GO:0043170//GO:0051707//GO:0019538//GO:0043207//GO:0006952//GO:0006793//GO:0044237//GO:0009987//GO:0071704//GO:0036211//GO:0008150//GO:0006468//GO:0044260//GO:0044267//GO:0050896//GO:0006464//GO:0051704//GO:0098542//GO:0008152//GO:0006950//GO:0043412//GO:0016310//GO:0006796//GO:0009607//GO:0044238//GO:0009605	macromolecule metabolic process//response to other organism//protein metabolic process//response to external biotic stimulus//defense response//phosphorus metabolic process//cellular metabolic process//cellular process//organic substance metabolic process//protein modification process//biological_process//protein phosphorylation//cellular macromolecule metabolic process//cellular protein metaboli…	--	--	GO:0030247//GO:0016772//GO:0032550//GO:0030246//GO:1901363//GO:0032549//GO:0097159//GO:0017076//GO:0032555//GO:1901265//GO:0001883//GO:0043167//GO:0030554//GO:0003674//GO:0035639//GO:0032559//GO:0097367//GO:0016301//GO:0005488//GO:0001871//GO:0036094//GO:0043168//GO:0032553//GO:0005524//GO:0000166//GO:0016740//GO:0003824//GO:0016773//GO:0004672//GO:0001882	polysaccharide binding//transferase activity, transferring phosphorus-containing groups//purine ribonucleoside binding//carbohydrate binding//heterocyclic compound binding//ribonucleoside binding//organic cyclic compound binding//purine nucleotide binding//purine ribonucleotide binding//nucleoside phosphate binding//purine nucleoside binding//ion binding//adenyl nucleotide binding//molecular_func…	no KO assigned | (RefSeq) hypothetical protein	http://www.genome.jp/dbget-bin/www_bget?pper:PRUPE_ppb021447mg	PREDICTED: probable receptor-like protein kinase At1g67000
Pav_sc0000208.1_g080.1.br	Pav_sc0000208.1	2	0	0	32	21	36	0.264583	0	0	4.04881	3.31845	4.04099	0.0881943	3.80275	27.1248	0.677412	5.3234	1.069e-09	2.8345e-08	UP	GO:0046483//GO:1903506//GO:0044238//GO:0009059//GO:0010556//GO:0060255//GO:0009058//GO:0006139//GO:0031326//GO:0051252//GO:0044271//GO:0006351//GO:0097659//GO:0016070//GO:0010467//GO:0010468//GO:0050789//GO:0050794//GO:0071704//GO:0032774//GO:1901360//GO:0031323//GO:1901576//GO:0044249//GO:0080090//GO:0019219//GO:0009987//GO:0008152//GO:0051171//GO:0044237//GO:0006355//GO:0009889//GO:0006807//GO:…	heterocycle metabolic process//regulation of nucleic acid-templated transcription//primary metabolic process//macromolecule biosynthetic process//regulation of macromolecule biosynthetic process//regulation of macromolecule metabolic process//biosynthetic process//nucleobase-containing compound metabolic process//regulation of cellular biosynthetic process//regulation of RNA metabolic process//ce…	--	--	GO:0001071//GO:0003700//GO:0003674	nucleic acid binding transcription factor activity//transcription factor activity, sequence-specific DNA binding//molecular_function	--	--	-\-
Pav_sc0003135.1_g610.1.mk	Pav_sc0003135.1	2	0	0	40	24	22	0.0558251	0	0	1.06784	0.800194	0.521046	0.0186084	0.796359	26.9328	0.677412	5.3132	1.7462e-09	4.4914e-08	UP	GO:0044699//GO:0044710//GO:0008150//GO:0008152//GO:0055114	single-organism process//single-organism metabolic process//biological_process//metabolic process//oxidation-reduction process	--	--	GO:0016491//GO:0003824//GO:0003674	oxidoreductase activity//catalytic activity//molecular_function	K04125 gibberellin 2-oxidase [EC:1.14.11.13] | (RefSeq) hypothetical protein	http://www.genome.jp/dbget-bin/www_bget?pper:PRUPE_ppa008211mg	PREDICTED: gibberellin 2-beta-dioxygenase-like
Pav_sc0004270.1_g020.1.mk	Pav_sc0004270.1	0	2	5	157	42	119	0	0.0634527	0.20006	4.95571	1.65575	3.33243	0.0878376	3.31463	94.5041	2.60208	5.1826	3.6805e-07	6.4694e-06	UP	--	--	GO:0043226//GO:0044464//GO:0005634//GO:0043231//GO:0043229//GO:0005623//GO:0043227//GO:0005622//GO:0005575//GO:0044424	organelle//cell part//nucleus//intracellular membrane-bounded organelle//intracellular organelle//cell//membrane-bounded organelle//intracellular//cellular_component//intracellular part	GO:0003674//GO:0005488//GO:0008270//GO:0043169//GO:0046914//GO:0046872//GO:0043167	molecular_function//binding//zinc ion binding//cation binding//transition metal ion binding//metal ion binding//ion binding	K14491 two-component response regulator ARR-B family | (RefSeq) hypothetical protein	http://www.genome.jp/dbget-bin/www_bget?pper:PRUPE_ppa023185mg	PREDICTED: putative two-component response regulator ARR21
Pav_sc0000119.1_g610.1.mk	Pav_sc0000119.1	0	0	0	4	13	5	0	0	0	0.186844	0.758405	0.207204	0	0.384151	7.47659	0	Inf	0.014662	0.060318	FALSE	--	--	--	--	GO:0003674//GO:0003824	molecular_function//catalytic activity	no KO assigned | (RefSeq) hypothetical protein	http://www.genome.jp/dbget-bin/www_bget?pper:PRUPE_ppa009852mg	PREDICTED: putative protein phosphatase 2C-like protein 44
Pav_sc0000558.1_g410.1.br	Pav_sc0000558.1	0	0	0	10	3	12	0	0	0	1.53638	0.57565	1.63564	0	1.24922	7.31856	0	Inf	0.0010437	0.0070949	UP	GO:0044271//GO:0044238//GO:0044249//GO:1901576//GO:0043604//GO:0010467//GO:0043043//GO:0044267//GO:0044260//GO:0043603//GO:0008152//GO:0008150//GO:1901566//GO:0034645//GO:0009058//GO:0009059//GO:0006412//GO:0071704//GO:0006807//GO:0034641//GO:0006518//GO:0044237//GO:0009987//GO:0019538//GO:0043170//GO:1901564	cellular nitrogen compound biosynthetic process//primary metabolic process//cellular biosynthetic process//organic substance biosynthetic process//amide biosynthetic process//gene expression//peptide biosynthetic process//cellular protein metabolic process//cellular macromolecule metabolic process//cellular amide metabolic process//metabolic process//biological_process//organonitrogen compound bi…	GO:0005840//GO:0005623//GO:0005737//GO:0044464//GO:0043229//GO:0043226//GO:0044444//GO:0032991//GO:0044424//GO:0043232//GO:0030529//GO:0005622//GO:0005575//GO:0043228	ribosome//cell//cytoplasm//cell part//intracellular organelle//organelle//cytoplasmic part//macromolecular complex//intracellular part//intracellular non-membrane-bounded organelle//ribonucleoprotein complex//intracellular//cellular_component//non-membrane-bounded organelle	GO:0005198//GO:0003674//GO:0003735	structural molecule activity//molecular_function//structural constituent of ribosome	--	--	-\-
Pav_sc0008459.1_g010.1.br	Pav_sc0008459.1	0	0	0	8	6	10	0	0	0	0.907931	0.850458	1.00686	0	0.921751	7.33287	0	Inf	0.0012053	0.0079944	UP	GO:0006796//GO:0044238//GO:0043412//GO:0016310//GO:0006468//GO:0044260//GO:0044267//GO:0006464//GO:0008152//GO:0008150//GO:0071704//GO:0036211//GO:0006793//GO:0009987//GO:0044237//GO:0043170//GO:0019538	phosphate-containing compound metabolic process//primary metabolic process//macromolecule modification//phosphorylation//protein phosphorylation//cellular macromolecule metabolic process//cellular protein metabolic process//cellular protein modification process//metabolic process//biological_process//organic substance metabolic process//protein modification process//phosphorus metabolic process//…	--	--	GO:0001882//GO:0036094//GO:0043168//GO:0032553//GO:0000166//GO:0005524//GO:0016740//GO:0016773//GO:0003824//GO:0004672//GO:0032559//GO:0097367//GO:0016301//GO:0005488//GO:0030554//GO:0003674//GO:0035639//GO:0043167//GO:1901265//GO:0001883//GO:0097159//GO:0017076//GO:0032555//GO:0032550//GO:1901363//GO:0032549//GO:0016772	nucleoside binding//small molecule binding//anion binding//ribonucleotide binding//nucleotide binding//ATP binding//transferase activity//phosphotransferase activity, alcohol group as acceptor//catalytic activity//protein kinase activity//adenyl ribonucleotide binding//carbohydrate derivative binding//kinase activity//binding//adenyl nucleotide binding//molecular_function//purine ribonucleoside t…	no KO assigned | (RefSeq) hypothetical protein	http://www.genome.jp/dbget-bin/www_bget?pper:PRUPE_ppa000890mg	PREDICTED: probable LRR receptor-like serine/threonine-protein kinase At1g56140
Pav_sc0000816.1_g140.1.br	Pav_sc0000816.1	2	0	0	42	10	36	0.0551408	0	0	1.10748	0.329327	0.842168	0.0183803	0.75966	25.9182	0.677412	5.2578	1.3637e-05	0.00016683	UP	--	--	--	--	--	--	no KO assigned | (RefSeq) hypothetical protein	http://www.genome.jp/dbget-bin/www_bget?pper:PRUPE_ppb016631mg	-\-
Pav_sc0000658.1_g020.1.br	Pav_sc0000658.1	0	0	0	7	5	12	0	0	0	0.375073	0.334601	0.570437	0	0.426704	7.18521	0	Inf	0.0012904	0.008428	UP	--	--	--	--	--	--	no KO assigned | (RefSeq) hypothetical protein	http://www.genome.jp/dbget-bin/www_bget?pper:PRUPEppa1027176m1	PREDICTED: uncharacterized protein LOC103948804
Pav_sc0001545.1_g060.1.mk	Pav_sc0001545.1	0	0	0	10	4	10	0	0	0	0.271452	0.13561	0.240824	0	0.215962	7.16775	0	Inf	0.0013009	0.0084813	UP	GO:0046173//GO:0044249//GO:1901576//GO:0031323//GO:0050794//GO:0010468//GO:0010467//GO:0005975//GO:0044723//GO:0044699//GO:0006520//GO:0044271//GO:0051252//GO:0031326//GO:0006139//GO:0043436//GO:0006525//GO:0090407//GO:0006796//GO:0019637//GO:0044238//GO:0008610//GO:1903506//GO:0046483//GO:1901615//GO:0034654//GO:0008150//GO:1901605//GO:0046165//GO:0006082//GO:0008654//GO:0034645//GO:0019751//GO:…	polyol biosynthetic process//cellular biosynthetic process//organic substance biosynthetic process//regulation of cellular metabolic process//regulation of cellular process//regulation of gene expression//gene expression//carbohydrate metabolic process//single-organism carbohydrate metabolic process//single-organism process//cellular amino acid metabolic process//cellular nitrogen compound biosyn…	--	--	GO:0000287//GO:0003824//GO:0003700//GO:0001071//GO:0003674//GO:0005488//GO:0016853//GO:0046872//GO:0016838//GO:0016872//GO:0043167//GO:0016829//GO:0004512//GO:0010333//GO:0043169//GO:0016835	magnesium ion binding//catalytic activity//transcription factor activity, sequence-specific DNA binding//nucleic acid binding transcription factor activity//molecular_function//binding//isomerase activity//metal ion binding//carbon-oxygen lyase activity, acting on phosphates//intramolecular lyase activity//ion binding//lyase activity//inositol-3-phosphate synthase activity//terpene synthase activ…	K14173 alpha-farnesene synthase [EC:4.2.3.46] | (RefSeq) hypothetical protein	http://www.genome.jp/dbget-bin/www_bget?pper:PRUPE_ppa016292mg	alpha-farnesene synthase
Pav_sc0000142.1_g080.1.mk	Pav_sc0000142.1	1	1	0	50	23	8	0.0732218	0.0703882	0	3.50152	2.01165	0.497032	0.04787	2.0034	25.8137	0.675551	5.2559	0.0023166	0.01367	UP	--	--	--	--	--	--	no KO assigned | (RefSeq) hypothetical protein	http://www.genome.jp/dbget-bin/www_bget?pper:PRUPE_ppa012131mg	hypothetical protein PRUPE_ppa012131mg
Pav_sc0000111.1_g070.1.mk	Pav_sc0000111.1	3	3	1	151	78	58	0.0566057	0.0544152	0.0228754	2.72497	1.758	0.928584	0.0446321	1.80385	90.2095	2.41233	5.2248	7.4885e-07	1.24e-05	UP	GO:0051179//GO:1902578//GO:0051234//GO:0044699//GO:0006820//GO:0044765//GO:0008150//GO:0006810//GO:0006811	localization//single-organism localization//establishment of localization//single-organism process//anion transport//single-organism transport//biological_process//transport//ion transport	GO:0044425//GO:0016020//GO:0016021//GO:0005575//GO:0031224	membrane part//membrane//integral component of membrane//cellular_component//intrinsic component of membrane	--	--	no KO assigned | (RefSeq) hypothetical protein	http://www.genome.jp/dbget-bin/www_bget?pper:PRUPE_ppa024840mg	PREDICTED: boron transporter 4
Pav_sc0000829.1_g050.1.br	Pav_sc0000829.1	0	0	0	7	9	6	0	0	0	0.810736	1.30185	0.61651	0	0.9097	7.11382	0	Inf	0.0018204	0.011271	UP	--	--	--	--	--	--	--	--	-\-
Pav_sc0001708.1_g060.1.mk	Pav_sc0001708.1	0	1	0	11	15	18	0	0.0606957	0	0.664258	1.13129	0.964328	0.0202319	0.919959	13.7847	0.336845	5.3548	2.1679e-05	0.00025113	UP	--	--	--	--	GO:0003674//GO:0005515//GO:0005488	molecular_function//protein binding//binding	K00799 glutathione S-transferase [EC:2.5.1.18] | (RefSeq) hypothetical protein	http://www.genome.jp/dbget-bin/www_bget?pper:PRUPE_ppb024827mg	PREDICTED: probable glutathione S-transferase
Pav_sc0000030.1_g1340.1.mk	Pav_sc0000030.1	4	5	2	178	92	191	0.135421	0.162725	0.0820892	5.76357	3.72047	5.48672	0.126745	4.99025	138.968	3.81041	5.1887	3.0394e-27	3.5998e-25	UP	GO:0044699//GO:0044710//GO:0008150//GO:0008152//GO:0055114	single-organism process//single-organism metabolic process//biological_process//metabolic process//oxidation-reduction process	GO:0016020//GO:0005575	membrane//cellular_component	GO:0016491//GO:0003824//GO:0003674	oxidoreductase activity//catalytic activity//molecular_function	K05278 flavonol synthase [EC:1.14.11.23] | (RefSeq) hypothetical protein	http://www.genome.jp/dbget-bin/www_bget?pper:PRUPE_ppa008455mg	PREDICTED: flavonol synthase/flavanone 3-hydroxylase-like
Pav_sc0000638.1_g210.1.mk	Pav_sc0000638.1	0	1	1	23	18	43	0	0.0280249	0.035344	0.641296	0.626819	1.06367	0.021123	0.777262	25.1569	0.722524	5.1218	4.4095e-09	1.0795e-07	UP	GO:0008152//GO:0008150	metabolic process//biological_process	--	--	GO:0003674//GO:0016758//GO:0003824//GO:0016740//GO:0016757	molecular_function//transferase activity, transferring hexosyl groups//catalytic activity//transferase activity//transferase activity, transferring glycosyl groups	no KO assigned | (RefSeq) hypothetical protein	http://www.genome.jp/dbget-bin/www_bget?pper:PRUPE_ppa004906mg	PREDICTED: anthocyanidin 3-O-glucosyltransferase 2-like
Pav_sc0000700.1_g890.1.br	Pav_sc0000700.1	0	0	1	12	12	20	0	0	0.134407	1.27238	1.58912	1.88137	0.0448022	1.58096	13.4719	0.385678	5.1264	2.4048e-05	0.000275	UP	--	--	--	--	--	--	--	--	-\-
Novel00112	Pav_sc0000100.1	0	0	0	10	6	6	0	0	0	0.446781	0.334799	0.237823	0	0.339801	6.86615	0	Inf	0.0020307	0.012286	UP	--	--	--	--	GO:0097367//GO:0032559//GO:0005488//GO:0003674//GO:0030554//GO:0043531//GO:0001882//GO:0032553//GO:0043168//GO:0036094//GO:0000166//GO:0032550//GO:0032549//GO:1901363//GO:0043167//GO:0001883//GO:1901265//GO:0032555//GO:0017076//GO:0097159	carbohydrate derivative binding//adenyl ribonucleotide binding//binding//molecular_function//adenyl nucleotide binding//ADP binding//nucleoside binding//ribonucleotide binding//anion binding//small molecule binding//nucleotide binding//purine ribonucleoside binding//ribonucleoside binding//heterocyclic compound binding//ion binding//purine nucleoside binding//nucleoside phosphate binding//purine …	no KO assigned | (RefSeq) hypothetical protein	http://www.genome.jp/dbget-bin/www_bget?pper:PRUPE_ppa023967mg	--
Pav_sc0000028.1_g820.1.mk	Pav_sc0000028.1	0	1	2	44	35	41	0	0.0684772	0.172722	2.99768	2.9781	2.47813	0.0803996	2.81797	37.3701	1.1082	5.0756	1.9239e-12	7.1633e-11	UP	GO:0008152//GO:0055114//GO:0008150//GO:0044699//GO:0044710	metabolic process//oxidation-reduction process//biological_process//single-organism process//single-organism metabolic process	--	--	GO:0051920//GO:0003674//GO:0003824//GO:0016209//GO:0016684//GO:0016491	peroxiredoxin activity//molecular_function//catalytic activity//antioxidant activity//oxidoreductase activity, acting on peroxide as acceptor//oxidoreductase activity	K11188 peroxiredoxin 6, 1-Cys peroxiredoxin [EC:1.11.1.7 1.11.1.15 3.1.1.-] | (RefSeq) hypothetical protein	http://www.genome.jp/dbget-bin/www_bget?pper:PRUPE_ppa011195mg	PREDICTED: 1-Cys peroxiredoxin
Pav_sc0000704.1_g080.1.mk	Pav_sc0000704.1	2	0	1	53	43	19	0.045108	0	0.0273435	1.14326	1.15845	0.363606	0.0241505	0.888438	37.2544	1.06309	5.1311	1.0924e-05	0.00013707	UP	GO:0031326//GO:0006139//GO:0051252//GO:0044271//GO:0046483//GO:1903506//GO:0044238//GO:0050794//GO:1901576//GO:0044249//GO:0031323//GO:0010468//GO:0010467//GO:0044260//GO:0065007//GO:0051171//GO:0008152//GO:0008150//GO:0034654//GO:0034645//GO:0009058//GO:0009059//GO:0010556//GO:0060255//GO:0071704//GO:0032774//GO:1901360//GO:0080090//GO:0006351//GO:0097659//GO:0016070//GO:0050789//GO:0006807//GO:…	regulation of cellular biosynthetic process//nucleobase-containing compound metabolic process//regulation of RNA metabolic process//cellular nitrogen compound biosynthetic process//heterocycle metabolic process//regulation of nucleic acid-templated transcription//primary metabolic process//regulation of cellular process//organic substance biosynthetic process//cellular biosynthetic process//regul…	GO:0005623//GO:0044464//GO:0005622//GO:0005575	cell//cell part//intracellular//cellular_component	GO:0003676//GO:0003677//GO:0005488//GO:0003674//GO:0097159//GO:1901363	nucleic acid binding//DNA binding//binding//molecular_function//organic cyclic compound binding//heterocyclic compound binding	no KO assigned | (RefSeq) hypothetical protein	http://www.genome.jp/dbget-bin/www_bget?pper:PRUPE_ppa016044mg	PREDICTED: myb-like protein J
Pav_sc0003846.1_g160.1.br	Pav_sc0003846.1	0	0	0	7	6	9	0	0	0	0.34784	0.372368	0.396764	0	0.372324	6.7685	0	Inf	0.0021223	0.012735	UP	--	--	--	--	--	--	no KO assigned | (RefSeq) hypothetical protein	http://www.genome.jp/dbget-bin/www_bget?pper:PRUPE_ppa015889mg	hypothetical protein
Pav_sc0004475.1_g020.1.br	Pav_sc0004475.1	0	0	1	16	10	17	0	0	0.0373498	0.471437	0.367995	0.444386	0.0124499	0.427939	13.106	0.385678	5.0867	3.2191e-05	0.00035664	UP	GO:0006355//GO:0009889//GO:0008152//GO:0009987//GO:0044237//GO:0051171//GO:0019219//GO:0044260//GO:0065007//GO:2001141//GO:0090304//GO:0045229//GO:0006807//GO:0034641//GO:0034645//GO:0071555//GO:0018130//GO:0008150//GO:0034654//GO:1901362//GO:0019438//GO:0006725//GO:0019222//GO:2000112//GO:0043170//GO:0071840//GO:0060255//GO:1903506//GO:0006366//GO:0042545//GO:0046483//GO:0010556//GO:0044238//GO:…	regulation of transcription, DNA-templated//regulation of biosynthetic process//metabolic process//cellular process//cellular metabolic process//regulation of nitrogen compound metabolic process//regulation of nucleobase-containing compound metabolic process//cellular macromolecule metabolic process//biological regulation//regulation of RNA biosynthetic process//nucleic acid metabolic process//ex…	GO:0043229//GO:0005575//GO:0043233//GO:0031974//GO:0043231//GO:0005622//GO:0005634//GO:0044464//GO:0043226//GO:0044422//GO:0043227//GO:0016592//GO:0000502//GO:0044446//GO:0005623//GO:0043234//GO:0044424//GO:0071944//GO:0032991//GO:0005618//GO:0022624//GO:0030312//GO:0044451//GO:0070013//GO:0008537//GO:0031981//GO:0005654//GO:0044428	intracellular organelle//cellular_component//organelle lumen//membrane-enclosed lumen//intracellular membrane-bounded organelle//intracellular//nucleus//cell part//organelle//organelle part//membrane-bounded organelle//mediator complex//proteasome complex//intracellular organelle part//cell//protein complex//intracellular part//cell periphery//macromolecular complex//cell wall//proteasome accesso…	GO:0098772//GO:0052689//GO:0016788//GO:0003674//GO:0030599//GO:0001104//GO:0030234//GO:0000989//GO:0001076//GO:0003824//GO:0000988//GO:0016787//GO:0003712//GO:0004857	molecular function regulator//carboxylic ester hydrolase activity//hydrolase activity, acting on ester bonds//molecular_function//pectinesterase activity//RNA polymerase II transcription cofactor activity//enzyme regulator activity//transcription factor activity, transcription factor binding//transcription factor activity, RNA polymerase II transcription factor binding//catalytic activity//transc…	K01051 pectinesterase [EC:3.1.1.11] | (RefSeq) hypothetical protein	http://www.genome.jp/dbget-bin/www_bget?pper:PRUPE_ppa004437mg	PREDICTED: putative pectinesterase/pectinesterase inhibitor 22
Pav_sc0001883.1_g240.1.mk	Pav_sc0001883.1	13	11	11	414	407	548	0.42255	0.343706	0.433468	12.8701	15.802	15.1136	0.399908	14.5952	424.354	12.3509	5.1026	4.9937e-73	4.1401e-70	UP	GO:0055085//GO:0009987//GO:1902578//GO:0051179//GO:0044763//GO:0008150//GO:0006810//GO:0044765//GO:0051234//GO:0044699	transmembrane transport//cellular process//single-organism localization//localization//single-organism cellular process//biological_process//transport//single-organism transport//establishment of localization//single-organism process	GO:0016021//GO:0005575//GO:0016020//GO:0044425//GO:0031224	integral component of membrane//cellular_component//membrane//membrane part//intrinsic component of membrane	GO:0005215//GO:0003674	transporter activity//molecular_function	K14638 solute carrier family 15 (peptide/histidine transporter), member 3/4 | (RefSeq) hypothetical protein	http://www.genome.jp/dbget-bin/www_bget?pper:PRUPE_ppa003507mg	PREDICTED: protein NRT1/ PTR FAMILY 5.4-like, partial
Pav_sc0004485.1_g010.1.mk	Pav_sc0004485.1	0	0	0	4	14	1	0	0	0	0.0636191	0.278096	0.0141103	0	0.118608	6.79397	0	Inf	0.086005	0.23427	FALSE	GO:0043412//GO:0071704//GO:0016310//GO:0036211//GO:0006796//GO:0044238//GO:0008150//GO:0043170//GO:0019538//GO:0006468//GO:0044267//GO:0044260//GO:0006464//GO:0006793//GO:0044237//GO:0008152//GO:0009987	macromolecule modification//organic substance metabolic process//phosphorylation//protein modification process//phosphate-containing compound metabolic process//primary metabolic process//biological_process//macromolecule metabolic process//protein metabolic process//protein phosphorylation//cellular protein metabolic process//cellular macromolecule metabolic process//cellular protein modificatio…	GO:0044425//GO:0031224//GO:0016020//GO:0016021//GO:0005575	membrane part//intrinsic component of membrane//membrane//integral component of membrane//cellular_component	GO:0017076//GO:0001871//GO:0036094//GO:0097159//GO:0046872//GO:0043168//GO:0032555//GO:0032553//GO:0005524//GO:0000166//GO:0016740//GO:0003824//GO:0016773//GO:0004672//GO:0005509//GO:0001882//GO:1901265//GO:0001883//GO:0043167//GO:0004674//GO:0030247//GO:0030554//GO:0016772//GO:0035639//GO:0003674//GO:0032559//GO:0032550//GO:0097367//GO:0043169//GO:0016301//GO:0030246//GO:0005488//GO:1901363//GO:…	purine nucleotide binding//pattern binding//small molecule binding//organic cyclic compound binding//metal ion binding//anion binding//purine ribonucleotide binding//ribonucleotide binding//ATP binding//nucleotide binding//transferase activity//catalytic activity//phosphotransferase activity, alcohol group as acceptor//protein kinase activity//calcium ion binding//nucleoside binding//nucleoside p…	--	--	PREDICTED: putative wall-associated receptor kinase-like 16
Pav_sc0002009.1_g110.1.mk	Pav_sc0002009.1	11	12	5	482	293	308	0.336252	0.352625	0.185299	14.0917	10.6985	7.9887	0.291392	10.9263	337.396	9.6963	5.1209	1.94e-19	1.344e-17	UP	GO:0044710//GO:0008150//GO:0055114//GO:0008152//GO:0044699	single-organism metabolic process//biological_process//oxidation-reduction process//metabolic process//single-organism process	--	--	GO:0016679//GO:0016491//GO:0003674//GO:0004097//GO:0003824//GO:0016682	oxidoreductase activity, acting on diphenols and related substances as donors//oxidoreductase activity//molecular_function//catechol oxidase activity//catalytic activity//oxidoreductase activity, acting on diphenols and related substances as donors, oxygen as acceptor	K00422 polyphenol oxidase [EC:1.10.3.1] | (RefSeq) hypothetical protein	http://www.genome.jp/dbget-bin/www_bget?pper:PRUPE_ppa022943mg	PREDICTED: polyphenol oxidase, chloroplastic-like
Pav_sc0000148.1_g020.1.br	Pav_sc0000148.1	0	0	0	6	5	11	0	0	0	0.0883944	0.0919988	0.143772	0	0.108055	6.62084	0	Inf	0.0022713	0.013457	UP	--	--	--	--	--	--	no KO assigned | (RefSeq) hypothetical protein	http://www.genome.jp/dbget-bin/www_bget?pper:PRUPE_ppa022115mg	hypothetical protein
Pav_co4006163.1_g010.1.br	Pav_co4006163.1	1	0	3	56	34	70	0.157427	0	0.572572	8.43165	6.39355	9.35041	0.243333	8.05854	48.2819	1.49574	5.0126	1.1838e-15	6.1089e-14	UP	--	--	--	--	--	--	no KO assigned | (RefSeq) hypothetical protein	http://www.genome.jp/dbget-bin/www_bget?pper:PRUPE_ppa005743mg	PREDICTED: LOW QUALITY PROTEIN: PERQ amino acid-rich with GYF domain-containing protein 2-like
Pav_sc0004917.1_g050.1.mk	Pav_sc0004917.1	0	0	0	6	10	4	0	0	0	1.12455	2.34082	0.665115	0	1.37683	6.66456	0	Inf	0.0030607	0.017204	UP	GO:0018130//GO:0019438//GO:1901362//GO:0006725//GO:2000112//GO:0019222//GO:0043170//GO:0006355//GO:0009889//GO:0044237//GO:0009987//GO:0019219//GO:2001141//GO:0090304//GO:0006807//GO:0034641//GO:0016070//GO:0097659//GO:0050789//GO:0006351//GO:1901360//GO:0080090//GO:0032774//GO:0071704//GO:0060255//GO:0010556//GO:0009059//GO:0009058//GO:0034645//GO:0008150//GO:0034654//GO:0051171//GO:0008152//GO:…	heterocycle biosynthetic process//aromatic compound biosynthetic process//organic cyclic compound biosynthetic process//cellular aromatic compound metabolic process//regulation of cellular macromolecule biosynthetic process//regulation of metabolic process//macromolecule metabolic process//regulation of transcription, DNA-templated//regulation of biosynthetic process//cellular metabolic process//…	--	--	GO:1901363//GO:0043565//GO:0097159//GO:0003674//GO:0005488//GO:0003677//GO:0001071//GO:0003676//GO:0003700	heterocyclic compound binding//sequence-specific DNA binding//organic cyclic compound binding//molecular_function//binding//DNA binding//nucleic acid binding transcription factor activity//nucleic acid binding//transcription factor activity, sequence-specific DNA binding	no KO assigned | (RefSeq) hypothetical protein	http://www.genome.jp/dbget-bin/www_bget?pper:PRUPE_ppa015480mg	PREDICTED: probable WRKY transcription factor 51
Pav_sc0001422.1_g080.1.mk	Pav_sc0001422.1	0	0	0	9	9	2	0	0	0	0.705774	0.881464	0.139143	0	0.57546	6.64711	0	Inf	0.0036211	0.019708	UP	--	--	--	--	GO:0003674//GO:0005488//GO:0043169//GO:0046872//GO:0043167	molecular_function//binding//cation binding//metal ion binding//ion binding	no KO assigned | (RefSeq) hypothetical protein	http://www.genome.jp/dbget-bin/www_bget?pper:PRUPE_ppa011906mg	PREDICTED: zinc finger protein 7-like
Pav_sc0002862.1_g290.1.mk	Pav_sc0002862.1	0	0	0	7	4	11	0	0	0	0.693392	0.494857	0.966678	0	0.718309	6.53828	0	Inf	0.0023605	0.01387	UP	--	--	--	--	--	--	no KO assigned | (RefSeq) hypothetical protein	http://www.genome.jp/dbget-bin/www_bget?pper:PRUPE_ppa006897mg	PREDICTED: GDSL esterase/lipase At3g48460
Pav_sc0001938.1_g520.1.mk	Pav_sc0001938.1	1	0	0	11	15	14	0.0211975	0	0	0.223009	0.379805	0.251806	0.00706584	0.284874	12.721	0.338706	5.231	5.9493e-05	0.00061094	UP	GO:0055085//GO:0009987//GO:0008150//GO:1902578//GO:0006810//GO:0044765//GO:0051179//GO:0044763//GO:0051234//GO:0044699	transmembrane transport//cellular process//biological_process//single-organism localization//transport//single-organism transport//localization//single-organism cellular process//establishment of localization//single-organism process	GO:0016021//GO:0005575//GO:0016020//GO:0031224//GO:0044425	integral component of membrane//cellular_component//membrane//intrinsic component of membrane//membrane part	GO:0003674//GO:0005215	molecular_function//transporter activity	K14638 solute carrier family 15 (peptide/histidine transporter), member 3/4 | (RefSeq) hypothetical protein	http://www.genome.jp/dbget-bin/www_bget?pper:PRUPE_ppa018162mg	PREDICTED: protein NRT1/ PTR FAMILY 4.5-like
Pav_sc0011612.1_g010.1.mk	Pav_sc0011612.1	1	0	2	36	41	34	0.207141	0	0.502257	7.13203	10.1446	5.97583	0.236466	7.75081	35.4071	1.11006	4.9953	1.3036e-11	4.4173e-10	UP	--	--	--	--	--	--	no KO assigned | (RefSeq) hypothetical protein	http://www.genome.jp/dbget-bin/www_bget?pper:PRUPE_ppa025191mg	PREDICTED: F-box/kelch-repeat protein At3g06240-like
Pav_sc0002250.1_g110.1.mk	Pav_sc0002250.1	0	0	0	7	5	9	0	0	0	0.419346	0.374096	0.478327	0	0.423923	6.38748	0	Inf	0.0029477	0.016655	UP	--	--	--	--	--	--	no KO assigned | (RefSeq) hypothetical protein	http://www.genome.jp/dbget-bin/www_bget?pper:PRUPE_ppa010296mg	PREDICTED: RING-H2 zinc finger protein RHA4a-like
Pav_sc0000464.1_g330.1.mk	Pav_sc0000464.1	0	1	0	20	13	6	0	0.0708275	0	1.40935	1.14412	0.3751	0.0236092	0.976187	12.5179	0.336845	5.2158	0.00028354	0.0023649	UP	--	--	--	--	--	--	no KO assigned | (RefSeq) hypothetical protein	http://www.genome.jp/dbget-bin/www_bget?pper:PRUPE_ppa014882mg	PREDICTED: uncharacterized protein At4g22758-like
Pav_sc0000500.1_g060.1.mk	Pav_sc0000500.1	10	3	5	357	192	107	0.11323	0.0326543	0.0686373	3.86611	2.59684	1.02801	0.0715071	2.49699	208.158	6.32599	5.0402	1.1043e-05	0.0001383	UP	GO:0044699//GO:0044723//GO:0005975//GO:0044238//GO:0008150//GO:0008152//GO:0044710//GO:0071704//GO:0009311//GO:0044763//GO:0044262//GO:0005984//GO:0005985//GO:0044237//GO:0009987	single-organism process//single-organism carbohydrate metabolic process//carbohydrate metabolic process//primary metabolic process//biological_process//metabolic process//single-organism metabolic process//organic substance metabolic process//oligosaccharide metabolic process//single-organism cellular process//cellular carbohydrate metabolic process//disaccharide metabolic process//sucrose metabo…	--	--	GO:0016740//GO:0016758//GO:0003824//GO:0046527//GO:0003674//GO:0016757//GO:0016157//GO:0035251//GO:0008194	transferase activity//transferase activity, transferring hexosyl groups//catalytic activity//glucosyltransferase activity//molecular_function//transferase activity, transferring glycosyl groups//sucrose synthase activity//UDP-glucosyltransferase activity//UDP-glycosyltransferase activity	K00696 sucrose-phosphate synthase [EC:2.4.1.14] | (RefSeq) hypothetical protein	http://www.genome.jp/dbget-bin/www_bget?pper:PRUPE_ppa000716mg	PREDICTED: probable sucrose-phosphate synthase 4
Pav_sc0000030.1_g1280.1.mk	Pav_sc0000030.1	1	0	0	20	12	7	0.0309489	0	0	0.591999	0.44362	0.183822	0.0103163	0.40648	12.4028	0.338706	5.1945	0.0001004	0.00096638	UP	--	--	--	--	--	--	K13946 auxin influx carrier (AUX1 LAX family) | (RefSeq) hypothetical protein	http://www.genome.jp/dbget-bin/www_bget?pper:PRUPE_ppa005323mg	PREDICTED: auxin transporter-like protein 3
Pav_sc0001323.1_g1090.1.mk	Pav_sc0001323.1	0	0	0	8	4	9	0	0	0	0.416789	0.260271	0.415985	0	0.364348	6.30492	0	Inf	0.0030624	0.017209	UP	GO:0009987//GO:0000902//GO:0022607//GO:0048646//GO:0071840//GO:0009653//GO:0044763//GO:0030030//GO:0042384//GO:0048858//GO:0060271//GO:0032990//GO:0044710//GO:0006950//GO:0044782//GO:0008152//GO:0006996//GO:0030031//GO:0032502//GO:0070925//GO:0055114//GO:0050896//GO:0048869//GO:0048856//GO:0032989//GO:0008150//GO:0016043//GO:0006979//GO:0044085//GO:0044699//GO:0044767//GO:0010927//GO:1902589	cellular process//cell morphogenesis//cellular component assembly//anatomical structure formation involved in morphogenesis//cellular component organization or biogenesis//anatomical structure morphogenesis//single-organism cellular process//cell projection organization//cilium assembly//cell projection morphogenesis//cilium morphogenesis//cell part morphogenesis//single-organism metabolic proces…	GO:0005575//GO:0034464//GO:0032991//GO:0043234	cellular_component//BBSome//macromolecular complex//protein complex	GO:1901363//GO:0016209//GO:0046906//GO:0016684//GO:0016491//GO:0097159//GO:0005488//GO:0003674//GO:0020037//GO:0004601//GO:0003824	heterocyclic compound binding//antioxidant activity//tetrapyrrole binding//oxidoreductase activity, acting on peroxide as acceptor//oxidoreductase activity//organic cyclic compound binding//binding//molecular_function//heme binding//peroxidase activity//catalytic activity	K00430 peroxidase [EC:1.11.1.7] | (RefSeq) hypothetical protein	http://www.genome.jp/dbget-bin/www_bget?pper:PRUPE_ppa008667mg	PREDICTED: peroxidase 43
Pav_sc0000869.1_g360.1.mk	Pav_sc0000869.1	1	0	0	11	16	11	0.053365	0	0	0.561429	1.01991	0.498085	0.0177883	0.693141	12.3043	0.338706	5.183	9.4445e-05	0.00091759	UP	--	--	--	--	GO:0042054//GO:0016741//GO:0016279//GO:0016740//GO:0003824//GO:0008170//GO:0008757//GO:0016278//GO:0005488//GO:0008276//GO:0005515//GO:0008168//GO:0018024//GO:0003674	histone methyltransferase activity//transferase activity, transferring one-carbon groups//protein-lysine N-methyltransferase activity//transferase activity//catalytic activity//N-methyltransferase activity//S-adenosylmethionine-dependent methyltransferase activity//lysine N-methyltransferase activity//binding//protein methyltransferase activity//protein binding//methyltransferase activity//histon…	no KO assigned | (RefSeq) hypothetical protein	http://www.genome.jp/dbget-bin/www_bget?pper:PRUPE_ppa001712mg	PREDICTED: putative disease resistance protein RGA1
Novel00966	Pav_sc0006018.1	0	1	0	10	16	12	0	0.0873085	0	0.868645	1.73581	0.924766	0.0291028	1.17641	12.2718	0.336845	5.1871	9.5671e-05	0.00092661	UP	--	--	--	--	--	--	no KO assigned | (RefSeq) hypothetical protein	http://www.genome.jp/dbget-bin/www_bget?pper:PRUPE_ppa001761mg	--
Novel00851	Pav_sc0002654.1	3	8	4	212	146	189	0.0864983	0.221736	0.139822	5.84612	5.02833	4.62383	0.149352	5.16609	169.159	5.25359	5.0089	9.649e-41	2.2429e-38	UP	--	--	--	--	--	--	no KO assigned | (RefSeq) hypothetical protein	http://www.genome.jp/dbget-bin/www_bget?pper:PRUPE_ppa019750mg	--
Pav_sc0001416.1_g150.1.mk	Pav_sc0001416.1	0	0	0	7	6	7	0	0	0	0.179448	0.192101	0.159201	0	0.176917	6.23668	0	Inf	0.0036878	0.019997	UP	--	--	GO:0044424//GO:0005623//GO:0043226//GO:0043227//GO:0043229//GO:0005575//GO:0043231//GO:0005622//GO:0005634//GO:0044464	intracellular part//cell//organelle//membrane-bounded organelle//intracellular organelle//cellular_component//intracellular membrane-bounded organelle//intracellular//nucleus//cell part	--	--	K05868 cyclin B | (RefSeq) hypothetical protein	http://www.genome.jp/dbget-bin/www_bget?pper:PRUPE_ppa025669mg	PREDICTED: G2/mitotic-specific cyclin S13-7-like
Pav_sc0001309.1_g810.1.mk	Pav_sc0001309.1	0	0	0	7	6	7	0	0	0	0.552774	0.591752	0.490406	0	0.544977	6.23668	0	Inf	0.0036878	0.019997	UP	GO:0006996//GO:0044237//GO:0008152//GO:0009987//GO:0006396//GO:0090304//GO:0043933//GO:0044260//GO:0034641//GO:0006807//GO:0008150//GO:0071840//GO:0043170//GO:0006325//GO:0006725//GO:0044238//GO:0046483//GO:0016568//GO:0006139//GO:0016043//GO:0051276//GO:0010467//GO:0016070//GO:0006338//GO:1901360//GO:0071704	organelle organization//cellular metabolic process//metabolic process//cellular process//RNA processing//nucleic acid metabolic process//macromolecular complex subunit organization//cellular macromolecule metabolic process//cellular nitrogen compound metabolic process//nitrogen compound metabolic process//biological_process//cellular component organization or biogenesis//macromolecule metabolic p…	GO:0043231//GO:0005575//GO:0043229//GO:0044464//GO:0005634//GO:0005622//GO:0043226//GO:0043227//GO:0044424//GO:0005623	intracellular membrane-bounded organelle//cellular_component//intracellular organelle//cell part//nucleus//intracellular//organelle//membrane-bounded organelle//intracellular part//cell	GO:0005488//GO:1901363//GO:0032549//GO:0097367//GO:0032559//GO:0032550//GO:0030554//GO:0003723//GO:0003674//GO:0035639//GO:0003676//GO:0016818//GO:0001882//GO:0001883//GO:1901265//GO:0043167//GO:0005524//GO:0000166//GO:0016817//GO:0003824//GO:0036094//GO:0097159//GO:0017076//GO:0016787//GO:0032555//GO:0043168//GO:0032553	binding//heterocyclic compound binding//ribonucleoside binding//carbohydrate derivative binding//adenyl ribonucleotide binding//purine ribonucleoside binding//adenyl nucleotide binding//RNA binding//molecular_function//purine ribonucleoside triphosphate binding//nucleic acid binding//hydrolase activity, acting on acid anhydrides, in phosphorus-containing anhydrides//nucleoside binding//purine nuc…	K09422 myb proto-oncogene protein, plant | (RefSeq) hypothetical protein	http://www.genome.jp/dbget-bin/www_bget?pper:PRUPE_ppa010908mg	PREDICTED: transcription factor WER-like
Pav_sc0000381.1_g240.1.mk	Pav_sc0000381.1	0	0	0	3	4	14	0	0	0	0.149733	0.249342	0.619917	0	0.339664	6.14216	0	Inf	0.0048008	0.024819	UP	--	--	--	--	GO:0003674//GO:0005515//GO:0005488	molecular_function//protein binding//binding	no KO assigned | (RefSeq) hypothetical protein	http://www.genome.jp/dbget-bin/www_bget?pper:PRUPE_ppa022506mg	PREDICTED: ubiquitin-conjugating enzyme E2-17 kDa-like
Pav_sc0000593.1_g010.1.mk	Pav_sc0000593.1	0	1	0	12	11	16	0	0.0189168	0	0.225848	0.258563	0.267155	0.00630561	0.250522	12.0272	0.336845	5.1581	9.0408e-05	0.00088449	UP	GO:1901360//GO:0006732//GO:0044249//GO:1901576//GO:0044710//GO:0071704//GO:0006575//GO:0044699//GO:0006520//GO:0043604//GO:0044271//GO:0044281//GO:0009058//GO:0043436//GO:0042559//GO:1901607//GO:0044763//GO:0046483//GO:0042398//GO:0044238//GO:0018130//GO:0008150//GO:1901605//GO:0006760//GO:0009396//GO:1901362//GO:0046394//GO:0019438//GO:0006725//GO:0042558//GO:0006082//GO:1901564//GO:0051186//GO:…	organic cyclic compound metabolic process//coenzyme metabolic process//cellular biosynthetic process//organic substance biosynthetic process//single-organism metabolic process//organic substance metabolic process//cellular modified amino acid metabolic process//single-organism process//cellular amino acid metabolic process//amide biosynthetic process//cellular nitrogen compound biosynthetic proce…	--	--	GO:0016645//GO:0097159//GO:0016491//GO:0004488//GO:0003824//GO:0003676//GO:0016646//GO:0003674//GO:0005488//GO:0005515//GO:1901363	oxidoreductase activity, acting on the CH-NH group of donors//organic cyclic compound binding//oxidoreductase activity//methylenetetrahydrofolate dehydrogenase (NADP+) activity//catalytic activity//nucleic acid binding//oxidoreductase activity, acting on the CH-NH group of donors, NAD or NADP as acceptor//molecular_function//binding//protein binding//heterocyclic compound binding	K11593 eukaryotic translation initiation factor 2C | (RefSeq) hypothetical protein	http://www.genome.jp/dbget-bin/www_bget?pper:PRUPE_ppa017623mg	PREDICTED: protein argonaute 4A-like
Pav_sc0001341.1_g170.1.mk	Pav_sc0001341.1	0	0	0	5	8	6	0	0	0	0.488848	0.97686	0.520431	0	0.662046	6.13588	0	Inf	0.0045234	0.023691	UP	--	--	--	--	--	--	K10706 senataxin [EC:3.6.4.-] | (RefSeq) hypothetical protein	http://www.genome.jp/dbget-bin/www_bget?pper:PRUPE_ppa020625mg	PREDICTED: helicase SEN1-like
Pav_sc0005707.1_g010.1.mk	Pav_sc0005707.1	0	0	0	5	8	6	0	0	0	0.800879	1.60039	0.852621	0	1.08463	6.13588	0	Inf	0.0045234	0.023691	UP	GO:0051707//GO:0043207//GO:0006952//GO:0050832//GO:0009620//GO:0008150//GO:0042742//GO:0050896//GO:0051704//GO:0006950//GO:0098542//GO:0009617//GO:0009607//GO:0009605	response to other organism//response to external biotic stimulus//defense response//defense response to fungus//response to fungus//biological_process//defense response to bacterium//response to stimulus//multi-organism process//response to stress//defense response to other organism//response to bacterium//response to biotic stimulus//response to external stimulus	--	--	--	--	no KO assigned | (RefSeq) hypothetical protein	http://www.genome.jp/dbget-bin/www_bget?pper:PRUPE_ppa012991mg	PREDICTED: pathogenesis-related protein PR-4
Pav_sc0001485.1_g080.1.mk	Pav_sc0001485.1	8	3	5	171	160	240	0.194755	0.0702068	0.14757	3.98144	4.65267	4.95751	0.137511	4.53054	175.817	5.64857	4.96	1.0465e-41	2.577e-39	UP	GO:0044699//GO:0051234//GO:0044763//GO:0044765//GO:0051179//GO:0006810//GO:1902578//GO:0008150//GO:0009987//GO:0055085	single-organism process//establishment of localization//single-organism cellular process//single-organism transport//localization//transport//single-organism localization//biological_process//cellular process//transmembrane transport	GO:0044425//GO:0031224//GO:0016020//GO:0005575//GO:0016021	membrane part//intrinsic component of membrane//membrane//cellular_component//integral component of membrane	GO:0005215//GO:0022857//GO:0003674	transporter activity//transmembrane transporter activity//molecular_function	K08202 MFS transporter, OCT family, solute carrier family 22 (organic cation transporter), member 4/5 | (RefSeq) hypothetical protein	http://www.genome.jp/dbget-bin/www_bget?pper:PRUPE_ppa003853mg	PREDICTED: LOW QUALITY PROTEIN: organic cation/carnitine transporter 4
Pav_sc0000024.1_g120.1.br	Pav_sc0000024.1	0	0	0	9	1	11	0	0	0	1.69386	0.235057	1.83669	0	1.2552	5.99215	0	Inf	0.0036977	0.020019	UP	GO:0022414//GO:0007276//GO:0007283//GO:0000003//GO:0048232//GO:0048609//GO:0044703//GO:0019953//GO:0032501//GO:0032504//GO:0044699//GO:0044702//GO:0051704//GO:0008150	reproductive process//gamete generation//spermatogenesis//reproduction//male gamete generation//multicellular organismal reproductive process//multi-organism reproductive process//sexual reproduction//multicellular organismal process//multicellular organism reproduction//single-organism process//single organism reproductive process//multi-organism process//biological_process	--	--	GO:0043167//GO:0046872//GO:0043169//GO:0005509//GO:0005488//GO:0003674	ion binding//metal ion binding//cation binding//calcium ion binding//binding//molecular_function	--	--	-\-
Pav_sc0002475.1_g100.1.mk	Pav_sc0002475.1	0	0	0	11	5	3	0	0	0	0.571109	0.324217	0.138183	0	0.344503	5.98587	0	Inf	0.004832	0.024955	UP	--	--	--	--	GO:0016740//GO:0003824//GO:0003674//GO:0008270//GO:0005488//GO:0046914//GO:0046872//GO:0016741//GO:0043167//GO:0008168//GO:0043169	transferase activity//catalytic activity//molecular_function//zinc ion binding//binding//transition metal ion binding//metal ion binding//transferase activity, transferring one-carbon groups//ion binding//methyltransferase activity//cation binding	no KO assigned | (RefSeq) hypothetical protein	http://www.genome.jp/dbget-bin/www_bget?pper:PRUPE_ppa026281mg	PREDICTED: BRCA1-associated protein-like
Pav_sc0000376.1_g220.1.br	Pav_sc0000376.1	0	0	0	8	3	9	0	0	0	1.13634	0.532205	1.13415	0	0.934231	5.92391	0	Inf	0.0042584	0.022492	UP	--	--	--	--	--	--	no KO assigned | (RefSeq) hypothetical protein	http://www.genome.jp/dbget-bin/www_bget?pper:PRUPE_ppa025194mg	hypothetical protein PRUPE_ppa025194mg, partial
Pav_sc0000103.1_g310.1.br	Pav_sc0000103.1	2	5	4	137	108	136	0.0857912	0.206178	0.208019	5.62055	5.53377	4.95	0.166663	5.36811	118.202	3.90435	4.92	5.9829e-31	8.7533e-29	UP	--	--	--	--	GO:0016740//GO:0003824//GO:0003674//GO:0016741//GO:0008168	transferase activity//catalytic activity//molecular_function//transferase activity, transferring one-carbon groups//methyltransferase activity	no KO assigned | (RefSeq) hypothetical protein	http://www.genome.jp/dbget-bin/www_bget?pper:PRUPE_ppa022297mg	PREDICTED: probable S-adenosylmethionine-dependent methyltransferase At5g38100
Novel00973	Pav_sc0006100.1	0	0	1	17	4	18	0	0	0.0774794	1.03908	0.305351	0.976072	0.0258265	0.773502	11.3842	0.385678	4.8835	0.00012121	0.0011419	UP	--	--	--	--	--	--	no KO assigned | (RefSeq) hypothetical protein	http://www.genome.jp/dbget-bin/www_bget?pper:PRUPE_ppa016761mg	--
Pav_sc0000009.1_g470.1.br	Pav_sc0000009.1	0	0	0	3	6	10	0	0	0	0.139412	0.348233	0.412276	0	0.299973	5.84056	0	Inf	0.0051586	0.026244	UP	GO:0043436//GO:0044765//GO:1901607//GO:0044238//GO:0006813//GO:0044249//GO:1901576//GO:0046451//GO:0051234//GO:0015672//GO:0044699//GO:0006520//GO:0055114//GO:0019752//GO:0006811//GO:0044711//GO:0043648//GO:0008152//GO:0008150//GO:1901605//GO:0046394//GO:0006082//GO:0009085//GO:1901566//GO:0006810//GO:0044281//GO:0051179//GO:0009058//GO:0006553//GO:0044763//GO:0071704//GO:0044710//GO:0030001//GO:…	oxoacid metabolic process//single-organism transport//alpha-amino acid biosynthetic process//primary metabolic process//potassium ion transport//cellular biosynthetic process//organic substance biosynthetic process//diaminopimelate metabolic process//establishment of localization//monovalent inorganic cation transport//single-organism process//cellular amino acid metabolic process//oxidation-redu…	--	--	GO:0048037//GO:0036094//GO:0000166//GO:0003824//GO:0005488//GO:0008839//GO:0051287//GO:0003674//GO:1901265//GO:0016620//GO:0097159//GO:0016491//GO:0016627//GO:1901363//GO:0050662//GO:0016628//GO:0016903	cofactor binding//small molecule binding//nucleotide binding//catalytic activity//binding//4-hydroxy-tetrahydrodipicolinate reductase//NAD binding//molecular_function//nucleoside phosphate binding//oxidoreductase activity, acting on the aldehyde or oxo group of donors, NAD or NADP as acceptor//organic cyclic compound binding//oxidoreductase activity//oxidoreductase activity, acting on the CH-CH g…	K18980 2-methylene-furan-3-one reductase [EC:1.3.1.105] | (RefSeq) hypothetical protein	http://www.genome.jp/dbget-bin/www_bget?pper:PRUPE_ppa014808mg	PREDICTED: 2-methylene-furan-3-one reductase-like
Pav_sc0000138.1_g590.1.mk	Pav_sc0000138.1	0	0	0	9	4	6	0	0	0	1.90857	1.05941	1.12882	0	1.3656	5.80566	0	Inf	0.0052415	0.026578	UP	--	--	--	--	--	--	--	--	-\-
Pav_sc0004638.1_g060.1.br	Pav_sc0004638.1	0	0	0	3	3	14	0	0	0	0.0500217	0.0624736	0.207097	0	0.106531	5.76115	0	Inf	0.011781	0.050688	FALSE	GO:0006464//GO:0006468//GO:0044260//GO:0044267//GO:0008152//GO:0008150//GO:0006796//GO:0044238//GO:0043412//GO:0016310//GO:0044237//GO:0009987//GO:0006793//GO:0043170//GO:0019538//GO:0071704//GO:0036211	cellular protein modification process//protein phosphorylation//cellular macromolecule metabolic process//cellular protein metabolic process//metabolic process//biological_process//phosphate-containing compound metabolic process//primary metabolic process//macromolecule modification//phosphorylation//cellular metabolic process//cellular process//phosphorus metabolic process//macromolecule metabol…	--	--	GO:0016301//GO:0097367//GO:0032559//GO:0005515//GO:0005488//GO:0003674//GO:0035639//GO:0030554//GO:0001882//GO:0043168//GO:0032553//GO:0036094//GO:0003824//GO:0016773//GO:0004672//GO:0005524//GO:0000166//GO:0016740//GO:0032550//GO:1901363//GO:0032549//GO:0016772//GO:0001883//GO:1901265//GO:0043167//GO:0032555//GO:0097159//GO:0017076	kinase activity//carbohydrate derivative binding//adenyl ribonucleotide binding//protein binding//binding//molecular_function//purine ribonucleoside triphosphate binding//adenyl nucleotide binding//nucleoside binding//anion binding//ribonucleotide binding//small molecule binding//catalytic activity//phosphotransferase activity, alcohol group as acceptor//protein kinase activity//ATP binding//nucl…	no KO assigned | (RefSeq) hypothetical protein	http://www.genome.jp/dbget-bin/www_bget?pper:PRUPE_ppa020889mg	PREDICTED: putative receptor-like protein kinase At3g47110
Pav_sc0000023.1_g070.1.br	Pav_sc0000023.1	0	0	0	3	11	3	0	0	0	0.0981947	0.449674	0.0871156	0	0.211662	5.88428	0	Inf	0.043954	0.14104	FALSE	--	--	--	--	GO:0003824//GO:0016740//GO:0016747//GO:0003674//GO:0016746	catalytic activity//transferase activity//transferase activity, transferring acyl groups other than amino-acyl groups//molecular_function//transferase activity, transferring acyl groups	--	--	PREDICTED: phenolic glucoside malonyltransferase 1-like
Pav_sc0001974.1_g300.1.mk	Pav_sc0001974.1	0	0	0	10	6	2	0	0	0	0.18947	0.141981	0.0336184	0	0.12169	5.80252	0	Inf	0.0061507	0.030275	UP	--	--	--	--	--	--	no KO assigned | (RefSeq) hypothetical protein	http://www.genome.jp/dbget-bin/www_bget?pper:PRUPE_ppa016067mg	PREDICTED: probable transcription factor KAN3 isoform X2
Pav_sc0008321.1_g010.1.mk	Pav_sc0008321.1	0	1	1	35	17	15	0	0.0190119	0.0239771	0.662033	0.401605	0.251716	0.0143297	0.438451	20.912	0.722524	4.8551	8.8797e-06	0.00011437	UP	--	--	--	--	GO:0004674//GO:0016772//GO:0003824//GO:0016773//GO:0004672//GO:0016740//GO:0016301//GO:0005515//GO:0005488//GO:0003674	protein serine/threonine kinase activity//transferase activity, transferring phosphorus-containing groups//catalytic activity//phosphotransferase activity, alcohol group as acceptor//protein kinase activity//transferase activity//kinase activity//protein binding//binding//molecular_function	no KO assigned | (RefSeq) hypothetical protein	http://www.genome.jp/dbget-bin/www_bget?pper:PRUPE_ppa001596mg	PREDICTED: multiple C2 and transmembrane domain-containing protein 2
Pav_sc0002106.1_g070.1.mk	Pav_sc0002106.1	0	0	0	3	7	8	0	0	0	0.379576	1.10615	0.897998	0	0.794575	5.68976	0	Inf	0.0064632	0.031514	UP	--	--	--	--	--	--	--	--	-\-
Pav_sc0004485.1_g090.1.mk	Pav_sc0004485.1	1	1	0	24	23	17	0.0268494	0.0258103	0	0.616299	0.737643	0.387291	0.0175532	0.580411	20.4469	0.675551	4.9197	4.3241e-07	7.5e-06	UP	GO:0044763//GO:0051179//GO:0009987//GO:0055085//GO:1902578//GO:0044765//GO:0044699//GO:0051234//GO:0006811//GO:0006810//GO:0008150	single-organism cellular process//localization//cellular process//transmembrane transport//single-organism localization//single-organism transport//single-organism process//establishment of localization//ion transport//transport//biological_process	GO:0005575//GO:0016020	cellular_component//membrane	GO:0005215//GO:0005216//GO:0022891//GO:0022838//GO:0015267//GO:0022803//GO:0022857//GO:0003674//GO:0015075//GO:0022892	transporter activity//ion channel activity//substrate-specific transmembrane transporter activity//substrate-specific channel activity//channel activity//passive transmembrane transporter activity//transmembrane transporter activity//molecular_function//ion transmembrane transporter activity//substrate-specific transporter activity	K05391 cyclic nucleotide gated channel, other eukaryote | (RefSeq) hypothetical protein	http://www.genome.jp/dbget-bin/www_bget?pper:PRUPE_ppa016622mg	PREDICTED: cyclic nucleotide-gated ion channel 1-like
Pav_sc0006018.1_g290.1.mk	Pav_sc0006018.1	8	2	6	198	171	151	0.223433	0.0536965	0.20316	5.28892	5.70475	3.57839	0.160096	4.85735	164.401	5.69741	4.8508	9.4793e-22	8.1021e-20	UP	GO:0007423//GO:0006261//GO:0032501//GO:0006139//GO:0046483//GO:1901137//GO:0044238//GO:0050794//GO:0044700//GO:0006260//GO:1901576//GO:0044249//GO:0044767//GO:0044699//GO:0006270//GO:0044085//GO:0048731//GO:0042546//GO:0032502//GO:0051716//GO:0065007//GO:0044260//GO:0050896//GO:0048856//GO:1901135//GO:0006950//GO:0044711//GO:0008152//GO:0006023//GO:0007275//GO:0006259//GO:0007219//GO:0023052//GO:…	sensory organ development//DNA-dependent DNA replication//multicellular organismal process//nucleobase-containing compound metabolic process//heterocycle metabolic process//carbohydrate derivative biosynthetic process//primary metabolic process//regulation of cellular process//single organism signaling//DNA replication//organic substance biosynthetic process//cellular biosynthetic process//single…	GO:0031224//GO:0044425//GO:0016021//GO:0005575//GO:0016020	intrinsic component of membrane//membrane part//integral component of membrane//cellular_component//membrane	GO:0003824//GO:0016740//GO:0003674//GO:0016746//GO:0016755	catalytic activity//transferase activity//molecular_function//transferase activity, transferring acyl groups//transferase activity, transferring amino-acyl groups	no KO assigned | (RefSeq) hypothetical protein	http://www.genome.jp/dbget-bin/www_bget?pper:PRUPE_ppa018702mg	PREDICTED: U-box domain-containing protein 52-like
Pav_sc0000398.1_g220.1.mk	Pav_sc0000398.1	0	0	1	14	16	3	0	0	0.0422875	0.467041	0.666631	0.0887884	0.0140958	0.407487	11.0724	0.385678	4.8434	0.006415	0.031347	UP	--	--	--	--	--	--	no KO assigned | (RefSeq) hypothetical protein	http://www.genome.jp/dbget-bin/www_bget?pper:PRUPE_ppa025162mg	PREDICTED: 21.7 kDa class VI heat shock protein
Pav_sc0009159.1_g010.1.br	Pav_sc0009159.1	0	0	0	8	5	5	0	0	0	0.432762	0.337806	0.239959	0	0.336843	5.62231	0	Inf	0.0066606	0.032275	UP	--	--	--	--	--	--	--	--	PREDICTED: auxilin-related protein 1-like
Pav_sc0010488.1_g010.1.br	Pav_sc0010488.1	2	2	1	52	56	52	0.125941	0.121068	0.076343	3.13176	4.21222	2.77841	0.107784	3.37413	50.6841	1.73678	4.867	2.6724e-15	1.3267e-13	UP	--	--	--	--	--	--	no KO assigned | (RefSeq) hypothetical protein	http://www.genome.jp/dbget-bin/www_bget?pper:PRUPE_ppa025931mg	PREDICTED: TMV resistance protein N-like
Pav_sc0001709.1_g030.1.mk	Pav_sc0001709.1	0	0	0	7	5	6	0	0	0	0.194099	0.173154	0.147599	0	0.171617	5.58976	0	Inf	0.0067589	0.032661	UP	GO:0015696//GO:0006811//GO:0006810//GO:0071705//GO:0008150//GO:0044765//GO:0044699//GO:0015672//GO:0051234//GO:0006812//GO:1902578//GO:0051179	ammonium transport//ion transport//transport//nitrogen compound transport//biological_process//single-organism transport//single-organism process//monovalent inorganic cation transport//establishment of localization//cation transport//single-organism localization//localization	GO:0005575//GO:0016020	cellular_component//membrane	GO:0003674//GO:0015075//GO:0008324//GO:0022892//GO:0022857//GO:0022891//GO:0022890//GO:0008519//GO:0015077//GO:0005215	molecular_function//ion transmembrane transporter activity//cation transmembrane transporter activity//substrate-specific transporter activity//transmembrane transporter activity//substrate-specific transmembrane transporter activity//inorganic cation transmembrane transporter activity//ammonium transmembrane transporter activity//monovalent inorganic cation transmembrane transporter activity//tr…	K03320 ammonium transporter, Amt family | (RefSeq) hypothetical protein	http://www.genome.jp/dbget-bin/www_bget?pper:PRUPE_ppa004749mg	PREDICTED: ammonium transporter 3 member 1-like
Pav_sc0000791.1_g230.1.br	Pav_sc0000791.1	0	0	1	16	9	10	0	0	0.0401805	0.507167	0.356297	0.281215	0.0133935	0.38156	10.8636	0.385678	4.816	0.00025241	0.0021375	UP	--	--	GO:0044444//GO:0044424//GO:0005623//GO:0005737//GO:0043229//GO:0005575//GO:0043231//GO:0005622//GO:0044464//GO:0005739//GO:0043226//GO:0043227	cytoplasmic part//intracellular part//cell//cytoplasm//intracellular organelle//cellular_component//intracellular membrane-bounded organelle//intracellular//cell part//mitochondrion//organelle//membrane-bounded organelle	GO:0016746//GO:0008137//GO:0016747//GO:0016655//GO:0016491//GO:0016740//GO:0003824//GO:0003954//GO:0016651//GO:0050136//GO:0003674	transferase activity, transferring acyl groups//NADH dehydrogenase (ubiquinone) activity//transferase activity, transferring acyl groups other than amino-acyl groups//oxidoreductase activity, acting on NAD(P)H, quinone or similar compound as acceptor//oxidoreductase activity//transferase activity//catalytic activity//NADH dehydrogenase activity//oxidoreductase activity, acting on NAD(P)H//NADH de…	no KO assigned | (RefSeq) hypothetical protein	http://www.genome.jp/dbget-bin/www_bget?pper:PRUPE_ppa016640mg	PREDICTED: BAHD acyltransferase At5g47980-like
Pav_sc0001938.1_g280.1.mk	Pav_sc0001938.1	4	0	1	63	52	44	0.08087	0	0.0245108	1.21819	1.25578	0.754803	0.0351269	1.07626	50.3158	1.7405	4.8534	8.5608e-15	4.1026e-13	UP	GO:0042398//GO:0044271//GO:0043604//GO:0006575//GO:0019184//GO:1901576//GO:0044249//GO:0044272//GO:0008152//GO:0043043//GO:0006790//GO:0043603//GO:1901566//GO:0008150//GO:0009058//GO:0006749//GO:0006750//GO:0071704//GO:0006518//GO:0044237//GO:0009987//GO:0006807//GO:0034641//GO:1901564	cellular modified amino acid biosynthetic process//cellular nitrogen compound biosynthetic process//amide biosynthetic process//cellular modified amino acid metabolic process//nonribosomal peptide biosynthetic process//organic substance biosynthetic process//cellular biosynthetic process//sulfur compound biosynthetic process//metabolic process//peptide biosynthetic process//sulfur compound metabo…	--	--	GO:0004363//GO:0048037//GO:0001882//GO:0003824//GO:0005524//GO:0000166//GO:0032553//GO:0043168//GO:0016874//GO:0036094//GO:0005488//GO:0032559//GO:0097367//GO:0035639//GO:0003674//GO:0030554//GO:0016879//GO:0016881//GO:1901265//GO:0001883//GO:0043167//GO:0032555//GO:0017076//GO:0097159//GO:0032549//GO:1901363//GO:0030170//GO:0032550	glutathione synthase activity//cofactor binding//nucleoside binding//catalytic activity//ATP binding//nucleotide binding//ribonucleotide binding//anion binding//ligase activity//small molecule binding//binding//adenyl ribonucleotide binding//carbohydrate derivative binding//purine ribonucleoside triphosphate binding//molecular_function//adenyl nucleotide binding//ligase activity, forming carbon-n…	no KO assigned | (RefSeq) hypothetical protein	http://www.genome.jp/dbget-bin/www_bget?pper:PRUPE_ppa004689mg	PREDICTED: uncharacterized aminotransferase C660.12c-like isoform X1
Pav_sc0000071.1_g810.1.mk	Pav_sc0000071.1	0	1	0	13	15	5	0	0.0796498	0	1.03018	1.48457	0.351519	0.0265499	0.955424	10.9248	0.336845	5.0194	0.0013926	0.0089824	UP	GO:0044700//GO:0071704//GO:0050794//GO:0050789//GO:0044699//GO:0007165//GO:0005975//GO:0044763//GO:0044238//GO:0008150//GO:0023052//GO:0050896//GO:0065007//GO:0051716//GO:0007154//GO:0008152//GO:0009987	single organism signaling//organic substance metabolic process//regulation of cellular process//regulation of biological process//single-organism process//signal transduction//carbohydrate metabolic process//single-organism cellular process//primary metabolic process//biological_process//signaling//response to stimulus//biological regulation//cellular response to stimulus//cell communication//met…	GO:0044421//GO:0005576//GO:0005578//GO:0005575//GO:0031012	extracellular region part//extracellular region//proteinaceous extracellular matrix//cellular_component//extracellular matrix	GO:0016787//GO:0046872//GO:0016798//GO:0003824//GO:0043167//GO:0005509//GO:0003674//GO:0004553//GO:0043169//GO:0005488//GO:0005515	hydrolase activity//metal ion binding//hydrolase activity, acting on glycosyl bonds//catalytic activity//ion binding//calcium ion binding//molecular_function//hydrolase activity, hydrolyzing O-glycosyl compounds//cation binding//binding//protein binding	K13448 calcium-binding protein CML | (RefSeq) hypothetical protein	http://www.genome.jp/dbget-bin/www_bget?pper:PRUPE_ppa025180mg	PREDICTED: calmodulin-like protein 1
Pav_sc0001305.1_g870.1.mk	Pav_sc0001305.1	0	0	0	6	5	7	0	0	0	0.329705	0.343149	0.341256	0	0.338036	5.5572	0	Inf	0.0068591	0.033049	UP	GO:0008150//GO:0034654//GO:0034645//GO:0065007//GO:0044260//GO:0008152//GO:0051171//GO:0031323//GO:0044249//GO:1901576//GO:0050794//GO:0010467//GO:0010468//GO:0006139//GO:0031326//GO:0051252//GO:0044271//GO:0046483//GO:1903506//GO:0044238//GO:0018130//GO:1901362//GO:0019438//GO:2000112//GO:0019222//GO:0006725//GO:0043170//GO:0090304//GO:2001141//GO:0006807//GO:0034641//GO:0006355//GO:0009889//GO:…	biological_process//nucleobase-containing compound biosynthetic process//cellular macromolecule biosynthetic process//biological regulation//cellular macromolecule metabolic process//metabolic process//regulation of nitrogen compound metabolic process//regulation of cellular metabolic process//cellular biosynthetic process//organic substance biosynthetic process//regulation of cellular process//g…	--	--	GO:0003674//GO:0005488//GO:0003677//GO:0003676//GO:1901363//GO:0097159	molecular_function//binding//DNA binding//nucleic acid binding//heterocyclic compound binding//organic cyclic compound binding	no KO assigned | (RefSeq) hypothetical protein	http://www.genome.jp/dbget-bin/www_bget?pper:PRUPE_ppa018188mg	PREDICTED: dof zinc finger protein DOF5.3-like
Pav_sc0003570.1_g020.1.br	Pav_sc0003570.1	0	0	2	25	17	24	0	0	0.20304	2.0022	1.70041	1.70524	0.06768	1.80262	20.3206	0.771357	4.7194	3.2777e-07	5.7982e-06	UP	--	--	--	--	--	--	--	--	PREDICTED: uncharacterized protein LOC103324210
Pav_sc0011537.1_g010.1.br	Pav_sc0011537.1	0	0	0	12	3	3	0	0	0	1.94278	0.606599	0.430894	0	0.993423	5.5223	0	Inf	0.015443	0.062895	FALSE	--	--	--	--	--	--	--	--	-\-
Pav_sc0000886.1_g850.1.mk	Pav_sc0000886.1	1	0	1	29	15	21	0.0113284	0	0.013734	0.314204	0.202976	0.201856	0.00835415	0.239679	19.9547	0.724384	4.7838	4.3981e-07	7.6123e-06	UP	GO:0022900//GO:0044699//GO:0022904//GO:0006091//GO:0008150//GO:0015980//GO:0055114//GO:0008152//GO:0044710//GO:0045333//GO:0044763//GO:0009987//GO:0044237	electron transport chain//single-organism process//respiratory electron transport chain//generation of precursor metabolites and energy//biological_process//energy derivation by oxidation of organic compounds//oxidation-reduction process//metabolic process//single-organism metabolic process//cellular respiration//single-organism cellular process//cellular process//cellular metabolic process	GO:0016020//GO:0005575	membrane//cellular_component	GO:0003824//GO:0005509//GO:0004601//GO:0003676//GO:0003674//GO:0016651//GO:0005488//GO:0097159//GO:0046872//GO:0016684//GO:0016491//GO:0043167//GO:0016209//GO:0050664//GO:0003723//GO:0043169//GO:1901363	catalytic activity//calcium ion binding//peroxidase activity//nucleic acid binding//molecular_function//oxidoreductase activity, acting on NAD(P)H//binding//organic cyclic compound binding//metal ion binding//oxidoreductase activity, acting on peroxide as acceptor//oxidoreductase activity//ion binding//antioxidant activity//oxidoreductase activity, acting on NAD(P)H, oxygen as acceptor//RNA bindi…	K13447 respiratory burst oxidase [EC:1.6.3.- 1.11.1.-] | (RefSeq) hypothetical protein	http://www.genome.jp/dbget-bin/www_bget?pper:PRUPE_ppa000913mg	PREDICTED: respiratory burst oxidase homolog protein A
Pav_sc0012345.1_g010.1.br	Pav_sc0012345.1	0	0	0	8	1	10	0	0	0	0.69093	0.107866	0.766218	0	0.521671	5.42779	0	Inf	0.0062644	0.030737	UP	GO:0008150//GO:0008152//GO:0051704//GO:0005975//GO:0044238//GO:0009405//GO:0019835//GO:0009987//GO:0071704	biological_process//metabolic process//multi-organism process//carbohydrate metabolic process//primary metabolic process//pathogenesis//cytolysis//cellular process//organic substance metabolic process	GO:0019867//GO:0016020//GO:0005575	outer membrane//membrane//cellular_component	GO:0003674//GO:0003824//GO:0016787//GO:0004553//GO:0016798	molecular_function//catalytic activity//hydrolase activity//hydrolase activity, hydrolyzing O-glycosyl compounds//hydrolase activity, acting on glycosyl bonds	no KO assigned | (RefSeq) hypothetical protein	http://www.genome.jp/dbget-bin/www_bget?pper:PRUPE_ppa001675mg	PREDICTED: probable beta-D-xylosidase 7
Pav_sc0006188.1_g030.1.br	Pav_sc0006188.1	1	0	0	14	6	15	0.0406788	0	0	0.54468	0.291544	0.517741	0.0135596	0.451322	10.4532	0.338706	4.9478	0.00030191	0.0025005	UP	GO:0044260//GO:0050896//GO:0051716//GO:0006950//GO:0008152//GO:0008150//GO:0006259//GO:0006139//GO:0046483//GO:0044238//GO:0006310//GO:0044699//GO:0090304//GO:0006807//GO:0034641//GO:0009987//GO:0044237//GO:0006725//GO:0043170//GO:0033554//GO:0044763//GO:0006281//GO:1901360//GO:0071704//GO:0044710//GO:0006974	cellular macromolecule metabolic process//response to stimulus//cellular response to stimulus//response to stress//metabolic process//biological_process//DNA metabolic process//nucleobase-containing compound metabolic process//heterocycle metabolic process//primary metabolic process//DNA recombination//single-organism process//nucleic acid metabolic process//nitrogen compound metabolic process//c…	--	--	GO:0032559//GO:0097367//GO:0005488//GO:0098519//GO:0016791//GO:0030554//GO:0016788//GO:0003674//GO:0035639//GO:0016818//GO:0001882//GO:0016462//GO:0043531//GO:0016787//GO:0036094//GO:0032553//GO:0043168//GO:0000166//GO:0005524//GO:0003824//GO:0032550//GO:0032549//GO:1901363//GO:0043167//GO:1901265//GO:0001883//GO:0003678//GO:0017111//GO:0004386//GO:0097159//GO:0017076//GO:0032555//GO:0042578//GO:…	adenyl ribonucleotide binding//carbohydrate derivative binding//binding//nucleotide phosphatase activity, acting on free nucleotides//phosphatase activity//adenyl nucleotide binding//hydrolase activity, acting on ester bonds//molecular_function//purine ribonucleoside triphosphate binding//hydrolase activity, acting on acid anhydrides, in phosphorus-containing anhydrides//nucleoside binding//pyrop…	no KO assigned | (RefSeq) hypothetical protein	http://www.genome.jp/dbget-bin/www_bget?pper:PRUPE_ppa026844mg	PREDICTED: putative disease resistance protein RGA3
Pav_co4088907.1_g010.1.mk	Pav_co4088907.1	0	1	0	16	8	10	0	0.0123572	0	0.19671	0.122839	0.109072	0.00411907	0.142874	10.4826	0.336845	4.9598	0.00034571	0.002809	UP	--	--	--	--	GO:0046872//GO:0097159//GO:0043167//GO:1901265//GO:1901363//GO:0043169//GO:0000166//GO:0036094//GO:0003674//GO:0005488	metal ion binding//organic cyclic compound binding//ion binding//nucleoside phosphate binding//heterocyclic compound binding//cation binding//nucleotide binding//small molecule binding//molecular_function//binding	K01530 phospholipid-translocating ATPase [EC:3.6.3.1] | (RefSeq) hypothetical protein	http://www.genome.jp/dbget-bin/www_bget?pper:PRUPE_ppa000420mg	PREDICTED: putative phospholipid-transporting ATPase 9
Pav_sc0000099.1_g700.1.mk	Pav_sc0000099.1	2	0	2	43	28	58	0.0428956	0	0.0520048	0.882058	0.71734	1.05552	0.0316335	0.884971	38.9249	1.44877	4.7478	1.616e-12	6.0991e-11	UP	GO:0044238//GO:0044765//GO:0044699//GO:0051234//GO:0042157//GO:0008152//GO:0006810//GO:0033036//GO:0006869//GO:0008150//GO:0051179//GO:0071704//GO:0010876//GO:0071702//GO:1902578//GO:0043170//GO:0019538	primary metabolic process//single-organism transport//single-organism process//establishment of localization//lipoprotein metabolic process//metabolic process//transport//macromolecule localization//lipid transport//biological_process//localization//organic substance metabolic process//lipid localization//organic substance transport//single-organism localization//macromolecule metabolic process//…	GO:0005576//GO:0005575	extracellular region//cellular_component	GO:0008289//GO:0005488//GO:0003674	lipid binding//binding//molecular_function	K20254 perilipin-4 | (RefSeq) hypothetical protein	http://www.genome.jp/dbget-bin/www_bget?pper:PRUPE_ppa019911mg	PREDICTED: embryonic protein DC-8 isoform X2
Pav_sc0003043.1_g170.1.mk	Pav_sc0003043.1	0	6	0	68	46	75	0	0.945842	0	10.665	9.01052	10.4357	0.315281	10.0371	57.7652	2.02107	4.837	3.2323e-17	1.9096e-15	UP	--	--	--	--	--	--	K14778 ATP-dependent RNA helicase DDX49/DBP8 [EC:3.6.4.13] | (RefSeq) hypothetical protein	http://www.genome.jp/dbget-bin/www_bget?pper:PRUPE_ppa004738mg	PREDICTED: DEAD-box ATP-dependent RNA helicase 36
Pav_sc0000051.1_g100.1.mk	Pav_sc0000051.1	1	0	0	10	15	7	0.0687454	0	0	0.65749	1.23174	0.408315	0.0229151	0.765848	10.5612	0.338706	4.9626	0.00075356	0.005392	UP	GO:0006811//GO:0098655//GO:0008643//GO:0006810//GO:0035725//GO:0008150//GO:0098662//GO:0044765//GO:0044699//GO:0015672//GO:0051234//GO:0071436//GO:0009987//GO:0071702//GO:0055085//GO:0034219//GO:1902578//GO:0006812//GO:0044763//GO:0034220//GO:0051179//GO:0006814//GO:0098660//GO:0030001	ion transport//cation transmembrane transport//carbohydrate transport//transport//sodium ion transmembrane transport//biological_process//inorganic cation transmembrane transport//single-organism transport//single-organism process//monovalent inorganic cation transport//establishment of localization//sodium ion export//cellular process//organic substance transport//transmembrane transport//carboh…	GO:0031224//GO:0005575//GO:0016021//GO:0016020//GO:0044425	intrinsic component of membrane//cellular_component//integral component of membrane//membrane//membrane part	GO:0016831//GO:0046873//GO:0003674//GO:0015075//GO:0008324//GO:0022892//GO:0016830//GO:0008948//GO:0015144//GO:0003824//GO:0022857//GO:1901476//GO:0022891//GO:0015081//GO:0016829//GO:0022890//GO:0015077//GO:0005215	carboxy-lyase activity//metal ion transmembrane transporter activity//molecular_function//ion transmembrane transporter activity//cation transmembrane transporter activity//substrate-specific transporter activity//carbon-carbon lyase activity//oxaloacetate decarboxylase activity//carbohydrate transmembrane transporter activity//catalytic activity//transmembrane transporter activity//carbohydrate …	no KO assigned | (RefSeq) hypothetical protein	http://www.genome.jp/dbget-bin/www_bget?pper:PRUPE_ppa025614mg	PREDICTED: protein GLUTAMINE DUMPER 6-like
Pav_sc0002584.1_g180.1.mk	Pav_sc0002584.1	19	14	2	609	259	180	0.648831	0.459585	0.0828015	19.8903	10.5648	5.2156	0.397072	11.8902	328.309	11.9226	4.7833	9.76e-05	0.00094199	UP	GO:0055114//GO:0044260//GO:0065007//GO:0042592//GO:0090304//GO:0006807//GO:0008380//GO:0034641//GO:0016071//GO:0000377//GO:0006396//GO:0044237//GO:0009987//GO:0008152//GO:0008150//GO:0065008//GO:0006725//GO:0019725//GO:0043170//GO:0006397//GO:0045454//GO:0006139//GO:0044763//GO:0046483//GO:0044238//GO:1901360//GO:0000375//GO:0071704//GO:0044710//GO:0050794//GO:0016070//GO:0000398//GO:0050789//GO:…	oxidation-reduction process//cellular macromolecule metabolic process//biological regulation//homeostatic process//nucleic acid metabolic process//nitrogen compound metabolic process//RNA splicing//cellular nitrogen compound metabolic process//mRNA metabolic process//RNA splicing, via transesterification reactions with bulged adenosine as nucleophile//RNA processing//cellular metabolic process//c…	GO:0030529//GO:0043229//GO:0005575//GO:0043231//GO:0005634//GO:0005622//GO:0044464//GO:0005681//GO:0043226//GO:0044422//GO:0043227//GO:0032991//GO:0044446//GO:0005623//GO:0044424//GO:0044428	ribonucleoprotein complex//intracellular organelle//cellular_component//intracellular membrane-bounded organelle//nucleus//intracellular//cell part//spliceosomal complex//organelle//organelle part//membrane-bounded organelle//macromolecular complex//intracellular organelle part//cell//intracellular part//nuclear part	GO:0015035//GO:0016209//GO:0003674//GO:0015036//GO:0009055//GO:0016667//GO:0016491//GO:0003824	protein disulfide oxidoreductase activity//antioxidant activity//molecular_function//disulfide oxidoreductase activity//electron carrier activity//oxidoreductase activity, acting on a sulfur group of donors//oxidoreductase activity//catalytic activity	K03671 thioredoxin 1 | (RefSeq) hypothetical protein	http://www.genome.jp/dbget-bin/www_bget?pper:PRUPE_ppa013299mg	PREDICTED: thioredoxin H2-like
Novel00558	Pav_sc0000977.1	0	0	3	59	20	16	0	0	0.186912	2.8999	1.22772	0.697683	0.0623039	1.60843	29.484	1.15703	4.6714	0.0016648	0.010462	UP	--	--	--	--	GO:0005515//GO:0005488//GO:0003674	protein binding//binding//molecular_function	no KO assigned | (RefSeq) hypothetical protein	http://www.genome.jp/dbget-bin/www_bget?pper:PRUPE_ppa000741mg	--
Pav_sc0000501.1_g120.1.br	Pav_sc0000501.1	1	0	0	17	5	12	0.0154189	0	0	0.250696	0.0920889	0.156996	0.00513963	0.166594	10.1698	0.338706	4.9081	0.00039053	0.0031092	UP	--	--	--	--	--	--	no KO assigned | (RefSeq) hypothetical protein	http://www.genome.jp/dbget-bin/www_bget?pper:PRUPE_ppa022115mg	hypothetical protein
Pav_sc0000045.1_g030.1.mk	Pav_sc0000045.1	0	0	0	4	5	8	0	0	0	0.474221	0.740337	0.841432	0	0.68533	5.22619	0	Inf	0.0093224	0.042204	UP	--	--	--	--	--	--	no KO assigned | (RefSeq) hypothetical protein	http://www.genome.jp/dbget-bin/www_bget?pper:PRUPE_ppa017493mg	PREDICTED: CLAVATA3/ESR (CLE)-related protein TDIF-like
Pav_sc0001836.1_g130.1.br	Pav_sc0001836.1	0	0	0	7	4	6	0	0	0	0.452342	0.322825	0.343976	0	0.373048	5.20874	0	Inf	0.0093968	0.042435	UP	--	--	--	--	--	--	no KO assigned | (RefSeq) hypothetical protein	http://www.genome.jp/dbget-bin/www_bget?pper:PRUPE_ppb019389mg	PREDICTED: putative ribonuclease H protein At1g65750
Pav_sc0000323.1_g640.1.mk	Pav_sc0000323.1	0	0	0	5	7	4	0	0	0	0.164014	0.28678	0.116407	0	0.189067	5.22305	0	Inf	0.010961	0.047846	UP	GO:0044763//GO:0051179//GO:0009987//GO:0055085//GO:1902578//GO:0009405//GO:0044765//GO:0044699//GO:0051234//GO:0051704//GO:0006810//GO:0008150	single-organism cellular process//localization//cellular process//transmembrane transport//single-organism localization//pathogenesis//single-organism transport//single-organism process//establishment of localization//multi-organism process//transport//biological_process	GO:0044425//GO:0005575//GO:0016021//GO:0016020//GO:0031224	membrane part//cellular_component//integral component of membrane//membrane//intrinsic component of membrane	GO:0005215//GO:0005198//GO:0003674	transporter activity//structural molecule activity//molecular_function	no KO assigned | (RefSeq) hypothetical protein	http://www.genome.jp/dbget-bin/www_bget?pper:PRUPE_ppa023046mg	PREDICTED: LOW QUALITY PROTEIN: protein NRT1/ PTR FAMILY 2.7-like
Pav_sc0005224.1_g060.1.br	Pav_sc0005224.1	0	1	2	34	26	31	0	0.160994	0.40608	5.44597	5.20126	4.40521	0.189025	5.01748	28.2972	1.1082	4.6744	2.4322e-09	6.1525e-08	UP	GO:0009058//GO:0006796//GO:0009123//GO:0090407//GO:0006139//GO:0044281//GO:0072521//GO:0044271//GO:0046483//GO:0009733//GO:0010033//GO:1901137//GO:0046040//GO:0044763//GO:0006366//GO:0044238//GO:0009059//GO:0055086//GO:0006352//GO:0019637//GO:0009260//GO:0009117//GO:0006367//GO:0009150//GO:0019693//GO:0009127//GO:0009725//GO:0071704//GO:0044710//GO:0009165//GO:0032774//GO:1901360//GO:0044249//GO:…	biosynthetic process//phosphate-containing compound metabolic process//nucleoside monophosphate metabolic process//organophosphate biosynthetic process//nucleobase-containing compound metabolic process//small molecule metabolic process//purine-containing compound metabolic process//cellular nitrogen compound biosynthetic process//heterocycle metabolic process//response to auxin//response to organ…	GO:0032991//GO:0044424//GO:0005623//GO:0043234//GO:0044446//GO:0000428//GO:0031981//GO:1990234//GO:0005654//GO:0044428//GO:0090575//GO:0005667//GO:0070013//GO:0044451//GO:0005622//GO:0005669//GO:0005634//GO:0061695//GO:0044464//GO:0043229//GO:1902494//GO:0005575//GO:0043233//GO:0030880//GO:0043231//GO:0031974//GO:0055029//GO:0044798//GO:0043227//GO:0044422//GO:0043226//GO:0016591	macromolecular complex//intracellular part//cell//protein complex//intracellular organelle part//DNA-directed RNA polymerase complex//nuclear lumen//transferase complex//nucleoplasm//nuclear part//RNA polymerase II transcription factor complex//transcription factor complex//intracellular organelle lumen//nucleoplasm part//intracellular//transcription factor TFIID complex//nucleus//transferase com…	GO:0043167//GO:1901265//GO:0001883//GO:0001882//GO:0032553//GO:0032555//GO:0016874//GO:0043168//GO:0046872//GO:0097159//GO:0036094//GO:0017076//GO:0003824//GO:0000287//GO:0000166//GO:0005524//GO:0043169//GO:0032559//GO:0032550//GO:0097367//GO:0032549//GO:1901363//GO:0005488//GO:0016879//GO:0003674//GO:0035639//GO:0030554	ion binding//nucleoside phosphate binding//purine nucleoside binding//nucleoside binding//ribonucleotide binding//purine ribonucleotide binding//ligase activity//anion binding//metal ion binding//organic cyclic compound binding//small molecule binding//purine nucleotide binding//catalytic activity//magnesium ion binding//nucleotide binding//ATP binding//cation binding//adenyl ribonucleotide bindi…	K14488 SAUR family protein | (RefSeq) hypothetical protein	http://www.genome.jp/dbget-bin/www_bget?pper:PRUPE_ppa026172mg	PREDICTED: indole-3-acetic acid-induced protein ARG7-like
Pav_sc0001964.1_g210.1.br	Pav_sc0001964.1	0	0	0	5	4	8	0	0	0	0.228822	0.228627	0.324808	0	0.260752	5.14363	0	Inf	0.0096817	0.043482	UP	GO:0044699//GO:0044767//GO:0016043//GO:0008150//GO:0032989//GO:0032502//GO:0048856//GO:0048869//GO:0044763//GO:0071840//GO:0009653//GO:0009987//GO:0000902	single-organism process//single-organism developmental process//cellular component organization//biological_process//cellular component morphogenesis//developmental process//anatomical structure development//cellular developmental process//single-organism cellular process//cellular component organization or biogenesis//anatomical structure morphogenesis//cellular process//cell morphogenesis	--	--	--	--	K03283 heat shock 70kDa protein 1/8 | (RefSeq) hypothetical protein	http://www.genome.jp/dbget-bin/www_bget?pper:PRUPE_ppa004251mg	PREDICTED: heat shock cognate 70 kDa protein-like
Pav_sc0000358.1_g100.1.br	Pav_sc0000358.1	1	0	0	9	5	20	0.10357	0	0	0.891504	0.618571	1.7576	0.0345234	1.08922	9.90939	0.338706	4.8707	0.00043358	0.0033901	UP	--	--	--	--	--	--	no KO assigned | (RefSeq) hypothetical protein	http://www.genome.jp/dbget-bin/www_bget?pper:PRUPE_ppa020262mg	PREDICTED: uncharacterized protein LOC103338603
Pav_sc0000308.1_g450.1.mk	Pav_sc0000308.1	0	0	1	10	13	8	0	0	0.216884	1.71097	2.77795	1.21434	0.0722945	1.90108	10.0651	0.385678	4.7058	0.00062583	0.0046012	UP	--	--	GO:0005575//GO:0005576	cellular_component//extracellular region	GO:0005488//GO:0050840//GO:0003674	binding//extracellular matrix binding//molecular_function	--	--	-\-
Pav_sc0001309.1_g1340.1.mk	Pav_sc0001309.1	0	0	0	14	1	2	0	0	0	0.39822	0.035525	0.05047	0	0.161405	5.09128	0	Inf	0.11576	0.29083	FALSE	--	--	--	--	GO:0003674//GO:0005515//GO:0005488	molecular_function//protein binding//binding	--	--	PREDICTED: FAS-associated factor 2-like
Pav_sc0010177.1_g010.1.br	Pav_sc0010177.1	0	2	0	23	15	21	0	0.118694	0	1.35804	1.10615	1.10005	0.0395646	1.18808	18.1639	0.673691	4.7528	2.029e-06	3.0419e-05	UP	GO:0008152//GO:0006508//GO:0044260//GO:0034645//GO:0034654//GO:0008150//GO:0044238//GO:0046483//GO:0044271//GO:0006139//GO:0010467//GO:0044249//GO:1901576//GO:0009987//GO:0044237//GO:0090304//GO:0034641//GO:0006807//GO:1901362//GO:0019438//GO:0018130//GO:0043170//GO:0006725//GO:0019538//GO:0009059//GO:0009058//GO:0016070//GO:0097659//GO:0006351//GO:1901360//GO:0032774//GO:0071704	metabolic process//proteolysis//cellular macromolecule metabolic process//cellular macromolecule biosynthetic process//nucleobase-containing compound biosynthetic process//biological_process//primary metabolic process//heterocycle metabolic process//cellular nitrogen compound biosynthetic process//nucleobase-containing compound metabolic process//gene expression//cellular biosynthetic process//or…	GO:0043231//GO:0043229//GO:0044464//GO:0005634//GO:0043226//GO:0005623//GO:0005575//GO:0005622//GO:0043227//GO:0044424	intracellular membrane-bounded organelle//intracellular organelle//cell part//nucleus//organelle//cell//cellular_component//intracellular//membrane-bounded organelle//intracellular part	GO:0008270//GO:0005488//GO:0097367//GO:0032559//GO:0030554//GO:0035639//GO:0003674//GO:0070011//GO:0008237//GO:0003676//GO:0001882//GO:0000166//GO:0005524//GO:0003824//GO:0036094//GO:0003677//GO:0016787//GO:0043168//GO:0032553//GO:0008233//GO:1901363//GO:0032549//GO:0032550//GO:0043169//GO:0004222//GO:0043167//GO:0004175//GO:0001883//GO:1901265//GO:0046914//GO:0017076//GO:0097159//GO:0046872//GO:…	zinc ion binding//binding//carbohydrate derivative binding//adenyl ribonucleotide binding//adenyl nucleotide binding//purine ribonucleoside triphosphate binding//molecular_function//peptidase activity, acting on L-amino acid peptides//metallopeptidase activity//nucleic acid binding//nucleoside binding//nucleotide binding//ATP binding//catalytic activity//small molecule binding//DNA binding//hydro…	K03798 cell division protease FtsH [EC:3.4.24.-] | (RefSeq) hypothetical protein	http://www.genome.jp/dbget-bin/www_bget?pper:PRUPE_ppa000789mg	PREDICTED: ATP-dependent zinc metalloprotease FTSH 12, chloroplastic
Pav_sc0000143.1_g650.1.mk	Pav_sc0000143.1	2	3	6	104	83	144	0.0486887	0.0702068	0.177084	2.42146	2.41358	2.9745	0.0986599	2.60318	100.955	4.00202	4.6568	1.069e-26	1.2031e-24	UP	GO:0044699//GO:0008150//GO:0055114//GO:0008152//GO:0044710	single-organism process//biological_process//oxidation-reduction process//metabolic process//single-organism metabolic process	--	--	GO:0003824//GO:0020037//GO:0003674//GO:0005488//GO:0046872//GO:0097159//GO:0046914//GO:0016491//GO:0043167//GO:0005506//GO:0016705//GO:0046906//GO:0043169//GO:1901363	catalytic activity//heme binding//molecular_function//binding//metal ion binding//organic cyclic compound binding//transition metal ion binding//oxidoreductase activity//ion binding//iron ion binding//oxidoreductase activity, acting on paired donors, with incorporation or reduction of molecular oxygen//tetrapyrrole binding//cation binding//heterocyclic compound binding	K09588 cytochrome P450 family 90 subfamily A polypeptide 1 [EC:1.14.-.-] | (RefSeq) hypothetical protein	http://www.genome.jp/dbget-bin/www_bget?pper:PRUPE_ppa005060mg	PREDICTED: cytochrome P450 90A1
Pav_sc0000212.1_g1170.1.mk	Pav_sc0000212.1	0	0	0	8	2	7	0	0	0	0.173729	0.0542439	0.134862	0	0.120945	5.01108	0	Inf	0.0103	0.045567	UP	GO:0051171//GO:0008152//GO:0065007//GO:0044260//GO:0034645//GO:0008150//GO:0034654//GO:0046483//GO:1903506//GO:0044238//GO:0031326//GO:0006139//GO:0051252//GO:0044271//GO:0044699//GO:0010468//GO:0010467//GO:0050794//GO:0031323//GO:0044249//GO:1901576//GO:0019219//GO:0044237//GO:0009987//GO:0006355//GO:0009889//GO:0006807//GO:0007049//GO:0034641//GO:0090304//GO:2001141//GO:2000112//GO:0019222//GO:…	regulation of nitrogen compound metabolic process//metabolic process//biological regulation//cellular macromolecule metabolic process//cellular macromolecule biosynthetic process//biological_process//nucleobase-containing compound biosynthetic process//heterocycle metabolic process//regulation of nucleic acid-templated transcription//primary metabolic process//regulation of cellular biosynthetic …	GO:0005634//GO:0044464//GO:0043229//GO:0043231//GO:0043226//GO:0005623//GO:0005622//GO:0005575//GO:0043227//GO:0044424	nucleus//cell part//intracellular organelle//intracellular membrane-bounded organelle//organelle//cell//intracellular//cellular_component//membrane-bounded organelle//intracellular part	GO:0005488//GO:0003674//GO:0003676//GO:0003677//GO:1901363//GO:0097159	binding//molecular_function//nucleic acid binding//DNA binding//heterocyclic compound binding//organic cyclic compound binding	no KO assigned | (RefSeq) hypothetical protein	http://www.genome.jp/dbget-bin/www_bget?pper:PRUPE_ppa004775mg	PREDICTED: NAC domain-containing protein 8-like, partial
Pav_sc0001990.1_g110.1.mk	Pav_sc0001990.1	1	1	0	27	18	12	0.0329345	0.03166	0	0.850473	0.708122	0.33534	0.0215315	0.631312	18.1076	0.675551	4.7444	3.2366e-06	4.5844e-05	UP	--	--	--	--	GO:0030247//GO:0030246//GO:0003674//GO:0005488//GO:0001871	polysaccharide binding//carbohydrate binding//molecular_function//binding//pattern binding	no KO assigned | (RefSeq) hypothetical protein	http://www.genome.jp/dbget-bin/www_bget?pper:PRUPE_ppa017824mg	PREDICTED: putative RING-H2 finger protein ATL21C
Pav_sc0002318.1_g420.1.mk	Pav_sc0002318.1	0	0	0	1	9	5	0	0	0	0.0278138	0.312637	0.123378	0	0.15461	5.05715	0	Inf	0.042633	0.13773	FALSE	GO:0044765//GO:0044699//GO:0015672//GO:0051234//GO:0006811//GO:0098655//GO:0015991//GO:0015988//GO:0006810//GO:0098662//GO:0008150//GO:0034220//GO:0044763//GO:0051179//GO:0098660//GO:1902600//GO:0009987//GO:0055085//GO:1902578//GO:0006812//GO:0006818//GO:0015992	single-organism transport//single-organism process//monovalent inorganic cation transport//establishment of localization//ion transport//cation transmembrane transport//ATP hydrolysis coupled proton transport//energy coupled proton transmembrane transport, against electrochemical gradient//transport//inorganic cation transmembrane transport//biological_process//ion transmembrane transport//single…	GO:0043234//GO:0098796//GO:0016469//GO:0032991//GO:0044425//GO:0033178//GO:0005575//GO:0016020	protein complex//membrane protein complex//proton-transporting two-sector ATPase complex//macromolecular complex//membrane part//proton-transporting two-sector ATPase complex, catalytic domain//cellular_component//membrane	GO:0016462//GO:0036442//GO:0016818//GO:0003993//GO:0003824//GO:0016787//GO:0022857//GO:0015399//GO:0046961//GO:0003674//GO:0015075//GO:0022804//GO:0008324//GO:0015078//GO:0042625//GO:0016788//GO:0022892//GO:0016791//GO:0017111//GO:0042626//GO:0022890//GO:0044769//GO:0015077//GO:0015405//GO:0005215//GO:0016817//GO:0016820//GO:0042578//GO:0042623//GO:0019829//GO:0022891//GO:0016887//GO:0043492	pyrophosphatase activity//hydrogen-exporting ATPase activity//hydrolase activity, acting on acid anhydrides, in phosphorus-containing anhydrides//acid phosphatase activity//catalytic activity//hydrolase activity//transmembrane transporter activity//primary active transmembrane transporter activity//proton-transporting ATPase activity, rotational mechanism//molecular_function//ion transmembrane tr…	--	--	PREDICTED: acid phosphatase 1
Pav_sc0000877.1_g1630.1.br	Pav_sc0000877.1	0	0	0	3	3	11	0	0	0	0.386065	0.482168	1.25585	0	0.708029	4.96342	0	Inf	0.010535	0.046444	UP	--	--	--	--	--	--	no KO assigned | (RefSeq) hypothetical protein	http://www.genome.jp/dbget-bin/www_bget?pper:PRUPEppa018764m2g	PREDICTED: uncharacterized protein At2g29880-like
Pav_sc0003974.1_g100.1.br	Pav_sc0003974.1	0	2	4	58	42	80	0	0.0409013	0.103166	1.18011	1.06729	1.44408	0.0480225	1.23049	54.5861	2.2164	4.6222	2.5229e-16	1.3938e-14	UP	GO:0007154//GO:0009987//GO:0065007//GO:0050896//GO:0051716//GO:0008150//GO:0023052//GO:0044763//GO:0050789//GO:0007165//GO:0044699//GO:0050794//GO:0044700	cell communication//cellular process//biological regulation//response to stimulus//cellular response to stimulus//biological_process//signaling//single-organism cellular process//regulation of biological process//signal transduction//single-organism process//regulation of cellular process//single organism signaling	--	--	GO:0005488//GO:1901363//GO:0005515//GO:0032549//GO:0032550//GO:0032559//GO:0097367//GO:0030554//GO:0016887//GO:0003674//GO:0035639//GO:0017111//GO:0016818//GO:0001882//GO:0016462//GO:0043531//GO:0043167//GO:1901265//GO:0001883//GO:0000166//GO:0005524//GO:0016817//GO:0003824//GO:0097159//GO:0036094//GO:0017076//GO:0016787//GO:0032555//GO:0043168//GO:0032553	binding//heterocyclic compound binding//protein binding//ribonucleoside binding//purine ribonucleoside binding//adenyl ribonucleotide binding//carbohydrate derivative binding//adenyl nucleotide binding//ATPase activity//molecular_function//purine ribonucleoside triphosphate binding//nucleoside-triphosphatase activity//hydrolase activity, acting on acid anhydrides, in phosphorus-containing anhydri…	no KO assigned | (RefSeq) hypothetical protein	http://www.genome.jp/dbget-bin/www_bget?pper:PRUPE_ppa025310mg	PREDICTED: TMV resistance protein N-like isoform X2
Pav_sc0001405.1_g1920.1.mk	Pav_sc0001405.1	2	3	7	141	46	187	0.0559243	0.0806402	0.237301	3.77082	1.53643	4.43676	0.124622	3.248	109.335	4.3877	4.6391	2.9374e-07	5.2334e-06	UP	GO:0009987//GO:0007154//GO:0044703//GO:0044706//GO:0008037//GO:0022414//GO:0048544//GO:0044763//GO:0009856//GO:0051704//GO:0008150//GO:0009875//GO:0032501//GO:0044699	cellular process//cell communication//multi-organism reproductive process//multi-multicellular organism process//cell recognition//reproductive process//recognition of pollen//single-organism cellular process//pollination//multi-organism process//biological_process//pollen-pistil interaction//multicellular organismal process//single-organism process	GO:0016021//GO:0005575//GO:0016020//GO:0044425//GO:0031224	integral component of membrane//cellular_component//membrane//membrane part//intrinsic component of membrane	--	--	no KO assigned | (RefSeq) hypothetical protein	http://www.genome.jp/dbget-bin/www_bget?pper:PRUPE_ppa021994mg	PREDICTED: G-type lectin S-receptor-like serine/threonine-protein kinase At5g24080
Pav_sc0001296.1_g350.1.mk	Pav_sc0001296.1	38	2	5	496	454	282	2.25178	0.113928	0.359205	28.1105	32.1353	14.179	0.908303	24.8083	396.004	15.4729	4.6777	9.2981e-10	2.484e-08	UP	GO:0006793//GO:0009987//GO:0044237//GO:0045017//GO:0046488//GO:0046474//GO:0042158//GO:0006629//GO:0043170//GO:0006644//GO:0019538//GO:0009059//GO:0044763//GO:0046467//GO:0009058//GO:0046486//GO:0036211//GO:0006650//GO:0071704//GO:0044710//GO:0044255//GO:0008152//GO:0044711//GO:1901135//GO:0044260//GO:0044267//GO:0006464//GO:0006643//GO:0006497//GO:0034645//GO:1903509//GO:0008150//GO:0006506//GO:…	phosphorus metabolic process//cellular process//cellular metabolic process//glycerolipid biosynthetic process//phosphatidylinositol metabolic process//glycerophospholipid biosynthetic process//lipoprotein biosynthetic process//lipid metabolic process//macromolecule metabolic process//phospholipid metabolic process//protein metabolic process//macromolecule biosynthetic process//single-organism cel…	GO:0005575//GO:0016021//GO:0016020//GO:0044425//GO:0031224	cellular_component//integral component of membrane//membrane//membrane part//intrinsic component of membrane	GO:0008194//GO:0016757//GO:0008375//GO:0017176//GO:0003674//GO:0016740//GO:0003824//GO:0016758	UDP-glycosyltransferase activity//transferase activity, transferring glycosyl groups//acetylglucosaminyltransferase activity//phosphatidylinositol N-acetylglucosaminyltransferase activity//molecular_function//transferase activity//catalytic activity//transferase activity, transferring hexosyl groups	K15382 solute carrier family 50 (sugar transporter) | (RefSeq) hypothetical protein	http://www.genome.jp/dbget-bin/www_bget?pper:PRUPE_ppa010208mg	PREDICTED: bidirectional sugar transporter SWEET4-like
Pav_sc0001663.1_g190.1.mk	Pav_sc0001663.1	0	0	0	8	4	4	0	0	0	0.630639	0.393813	0.279743	0	0.434732	4.97538	0	Inf	0.012222	0.052232	FALSE	--	--	--	--	--	--	no KO assigned | (RefSeq) hypothetical protein	http://www.genome.jp/dbget-bin/www_bget?pper:PRUPE_ppb022375mg	-\-
Pav_co4041309.1_g010.1.br	Pav_co4041309.1	5	6	0	131	84	97	0.702799	0.810722	0	17.6107	14.1034	11.5687	0.504507	14.4276	96.8968	3.7146	4.7052	7.9668e-24	7.5629e-22	UP	--	--	--	--	--	--	K14513 ethylene-insensitive protein 2 | (RefSeq) hypothetical protein	http://www.genome.jp/dbget-bin/www_bget?pper:PRUPE_ppa000305mg	PREDICTED: ethylene-insensitive protein 2 isoform X3
Pav_sc0000892.1_g010.1.br	Pav_sc0000892.1	0	0	0	8	6	1	0	0	0	0.55001	0.515193	0.0609942	0	0.375399	4.93969	0	Inf	0.014602	0.06016	FALSE	--	--	--	--	--	--	no KO assigned | (RefSeq) hypothetical protein	http://www.genome.jp/dbget-bin/www_bget?pper:PRUPE_ppb024514mg	hypothetical protein PRUPE_ppb024514mg
Pav_sc0000759.1_g400.1.mk	Pav_sc0000759.1	0	0	0	9	3	4	0	0	0	0.380642	0.158465	0.150087	0	0.229732	4.89283	0	Inf	0.012688	0.053807	FALSE	GO:0050794//GO:0071704//GO:0032774//GO:1901360//GO:0031323//GO:0044249//GO:1901576//GO:0080090//GO:0006351//GO:0097659//GO:0016070//GO:0010467//GO:0010468//GO:0050789//GO:0009058//GO:0006139//GO:0031326//GO:0051252//GO:0044271//GO:0046483//GO:1903506//GO:0044238//GO:0009059//GO:0010556//GO:0060255//GO:2000112//GO:0019222//GO:0006725//GO:0043170//GO:0018130//GO:0008150//GO:1901362//GO:0019438//GO:…	regulation of cellular process//organic substance metabolic process//RNA biosynthetic process//organic cyclic compound metabolic process//regulation of cellular metabolic process//cellular biosynthetic process//organic substance biosynthetic process//regulation of primary metabolic process//transcription, DNA-templated//nucleic acid-templated transcription//RNA metabolic process//gene expression/…	--	--	GO:0046872//GO:0097159//GO:0003677//GO:0043565//GO:0046914//GO:0043167//GO:0003700//GO:0003676//GO:0001071//GO:0003674//GO:0043169//GO:1901363//GO:0008270//GO:0005488	metal ion binding//organic cyclic compound binding//DNA binding//sequence-specific DNA binding//transition metal ion binding//ion binding//transcription factor activity, sequence-specific DNA binding//nucleic acid binding//nucleic acid binding transcription factor activity//molecular_function//cation binding//heterocyclic compound binding//zinc ion binding//binding	--	--	PREDICTED: GATA transcription factor 9-like
Pav_sc0002106.1_g110.1.br	Pav_sc0002106.1	52	10	8	685	742	443	7.51027	1.38839	1.40079	94.6212	128.009	54.2887	3.43315	92.3063	604.957	24.0666	4.6517	6.4822e-09	1.5443e-07	UP	--	--	--	--	--	--	no KO assigned | (RefSeq) hypothetical protein	http://www.genome.jp/dbget-bin/www_bget?pper:PRUPE_ppa013698mg	PREDICTED: uncharacterized protein LOC103323136
Pav_sc0000055.1_g570.1.mk	Pav_sc0000055.1	7	0	0	77	67	42	0.185208	0	0	1.94849	2.11749	0.942898	0.061736	1.66963	59.6777	2.37094	4.6537	2.5542e-08	5.5531e-07	UP	--	--	--	--	--	--	K01193 beta-fructofuranosidase [EC:3.2.1.26] | (RefSeq) hypothetical protein	http://www.genome.jp/dbget-bin/www_bget?pper:PRUPE_ppa004218mg	PREDICTED: beta-fructofuranosidase, insoluble isoenzyme 1-like
Pav_sc0007674.1_g020.1.br	Pav_sc0007674.1	0	0	1	10	10	10	0	0	0.0286573	0.226074	0.282351	0.200566	0.00955243	0.23633	9.45385	0.385678	4.6154	0.00091402	0.0063449	UP	GO:0036211//GO:0071704//GO:0044237//GO:0009987//GO:0006793//GO:0019538//GO:0043170//GO:0044238//GO:0006796//GO:0016310//GO:0043412//GO:0008152//GO:0006464//GO:0044260//GO:0044267//GO:0006468//GO:0008150	protein modification process//organic substance metabolic process//cellular metabolic process//cellular process//phosphorus metabolic process//protein metabolic process//macromolecule metabolic process//primary metabolic process//phosphate-containing compound metabolic process//phosphorylation//macromolecule modification//metabolic process//cellular protein modification process//cellular macromol…	--	--	GO:1901265//GO:0001883//GO:0043167//GO:0032555//GO:0097159//GO:0017076//GO:0032549//GO:1901363//GO:0032550//GO:0016772//GO:0001882//GO:0004672//GO:0003824//GO:0016773//GO:0016740//GO:0005524//GO:0000166//GO:0032553//GO:0043168//GO:0036094//GO:0005515//GO:0005488//GO:0016301//GO:0032559//GO:0097367//GO:0003674//GO:0035639//GO:0030554	nucleoside phosphate binding//purine nucleoside binding//ion binding//purine ribonucleotide binding//organic cyclic compound binding//purine nucleotide binding//ribonucleoside binding//heterocyclic compound binding//purine ribonucleoside binding//transferase activity, transferring phosphorus-containing groups//nucleoside binding//protein kinase activity//catalytic activity//phosphotransferase act…	no KO assigned | (RefSeq) hypothetical protein	http://www.genome.jp/dbget-bin/www_bget?pper:PRUPE_ppa020479mg	PREDICTED: probable LRR receptor-like serine/threonine-protein kinase At3g47570
Pav_sc0002136.1_g280.1.mk	Pav_sc0002136.1	1	2	0	36	23	24	0.0656858	0.126288	0	2.26162	1.80461	1.33763	0.0639911	1.80129	25.8898	1.0124	4.6765	1.7609e-08	3.9457e-07	UP	GO:0006950//GO:0008152//GO:0051171//GO:0098542//GO:0050896//GO:0065007//GO:0044260//GO:0051704//GO:0034645//GO:0042742//GO:0008150//GO:0034654//GO:0009605//GO:1903506//GO:0046483//GO:0044238//GO:0044271//GO:0051252//GO:0006139//GO:0031326//GO:0009607//GO:0010467//GO:0010468//GO:0031323//GO:0044249//GO:1901576//GO:0009617//GO:0050794//GO:0050830//GO:0006355//GO:0009889//GO:0009987//GO:0044237//GO:…	response to stress//metabolic process//regulation of nitrogen compound metabolic process//defense response to other organism//response to stimulus//biological regulation//cellular macromolecule metabolic process//multi-organism process//cellular macromolecule biosynthetic process//defense response to bacterium//biological_process//nucleobase-containing compound biosynthetic process//response to e…	GO:0043229//GO:0043231//GO:0005634//GO:0044464//GO:0043226//GO:0005623//GO:0005575//GO:0005622//GO:0043227//GO:0044424	intracellular organelle//intracellular membrane-bounded organelle//nucleus//cell part//organelle//cell//cellular_component//intracellular//membrane-bounded organelle//intracellular part	GO:0005488//GO:0003674//GO:0001071//GO:0003676//GO:0003700//GO:0003677//GO:1901363//GO:0043565//GO:0097159	binding//molecular_function//nucleic acid binding transcription factor activity//nucleic acid binding//transcription factor activity, sequence-specific DNA binding//DNA binding//heterocyclic compound binding//sequence-specific DNA binding//organic cyclic compound binding	K09264 MADS-box transcription factor, plant | (RefSeq) hypothetical protein	http://www.genome.jp/dbget-bin/www_bget?pper:PRUPE_ppa011140mg	SEEDSTICK-like protein
Pav_sc0000129.1_g1190.1.mk	Pav_sc0000129.1	0	0	0	4	6	5	0	0	0	0.848255	1.58912	0.940685	0	1.12602	4.80948	0	Inf	0.015446	0.062896	FALSE	--	--	--	--	--	--	no KO assigned | (RefSeq) hypothetical protein	http://www.genome.jp/dbget-bin/www_bget?pper:PRUPE_ppa014409mg	-\-
Pav_sc0000354.1_g090.1.mk	Pav_sc0000354.1	0	0	0	8	2	6	0	0	0	0.308062	0.096187	0.204978	0	0.203076	4.74517	0	Inf	0.013586	0.056782	FALSE	GO:0006811//GO:0008150//GO:0006810//GO:0006812//GO:1902578//GO:0051179//GO:0044765//GO:0006813//GO:0051234//GO:0015672//GO:0044699//GO:0030001	ion transport//biological_process//transport//cation transport//single-organism localization//localization//single-organism transport//potassium ion transport//establishment of localization//monovalent inorganic cation transport//single-organism process//metal ion transport	GO:0016021//GO:0005575//GO:0043229//GO:1902494//GO:0043231//GO:0005622//GO:0005634//GO:0044464//GO:0005680//GO:0016020//GO:0043226//GO:0044422//GO:0000152//GO:0043227//GO:0000151//GO:0031224//GO:0032991//GO:0044446//GO:0005623//GO:0031461//GO:0043234//GO:0044424//GO:0044425//GO:1990234//GO:0044428	integral component of membrane//cellular_component//intracellular organelle//catalytic complex//intracellular membrane-bounded organelle//intracellular//nucleus//cell part//anaphase-promoting complex//membrane//organelle//organelle part//nuclear ubiquitin ligase complex//membrane-bounded organelle//ubiquitin ligase complex//intrinsic component of membrane//macromolecular complex//intracellular or…	GO:0043169//GO:0005249//GO:0005261//GO:0005216//GO:0005488//GO:0008270//GO:0019787//GO:0046873//GO:0022836//GO:0005515//GO:0022892//GO:0031420//GO:0015075//GO:0003674//GO:0022891//GO:0008324//GO:0022843//GO:0015267//GO:0015077//GO:0043167//GO:0022832//GO:0022890//GO:0022838//GO:0046872//GO:0022857//GO:0005244//GO:0015079//GO:0016740//GO:0005215//GO:0030955//GO:0005267//GO:0046914//GO:0022803//GO:…	cation binding//voltage-gated potassium channel activity//cation channel activity//ion channel activity//binding//zinc ion binding//ubiquitin-like protein transferase activity//metal ion transmembrane transporter activity//gated channel activity//protein binding//substrate-specific transporter activity//alkali metal ion binding//ion transmembrane transporter activity//molecular_function//substrat…	--	--	PREDICTED: RING-H2 finger protein ATL46
Pav_sc0001434.1_g010.1.br	Pav_sc0001434.1	0	0	0	8	2	6	0	0	0	0.879213	0.274519	0.58501	0	0.579581	4.74517	0	Inf	0.013586	0.056782	FALSE	GO:0036211//GO:0016310//GO:0043412//GO:0071704//GO:0044238//GO:0006796//GO:0008150//GO:0019538//GO:0043170//GO:0006793//GO:0044237//GO:0008152//GO:0009987//GO:0044260//GO:0044267//GO:0006468//GO:0006464	protein modification process//phosphorylation//macromolecule modification//organic substance metabolic process//primary metabolic process//phosphate-containing compound metabolic process//biological_process//protein metabolic process//macromolecule metabolic process//phosphorus metabolic process//cellular metabolic process//metabolic process//cellular process//cellular macromolecule metabolic pro…	--	--	GO:0016740//GO:0005524//GO:0000166//GO:0004672//GO:0003824//GO:0016773//GO:0097159//GO:0036094//GO:0017076//GO:0032553//GO:0032555//GO:0043168//GO:0001883//GO:1901265//GO:0043167//GO:0001882//GO:0016772//GO:0030554//GO:0003674//GO:0035639//GO:0005488//GO:0032549//GO:1901363//GO:0097367//GO:0032559//GO:0032550//GO:0016301	transferase activity//ATP binding//nucleotide binding//protein kinase activity//catalytic activity//phosphotransferase activity, alcohol group as acceptor//organic cyclic compound binding//small molecule binding//purine nucleotide binding//ribonucleotide binding//purine ribonucleotide binding//anion binding//purine nucleoside binding//nucleoside phosphate binding//ion binding//nucleoside binding/…	--	--	PREDICTED: probable LRR receptor-like serine/threonine-protein kinase At3g47570
Pav_sc0003241.1_g120.1.br	Pav_sc0003241.1	0	0	0	3	6	6	0	0	0	0.194696	0.486325	0.345458	0	0.34216	4.77693	0	Inf	0.015668	0.063571	FALSE	--	--	--	--	--	--	no KO assigned | (RefSeq) hypothetical protein	http://www.genome.jp/dbget-bin/www_bget?pper:PRUPE_ppb017095mg	PREDICTED: uncharacterized protein LOC103337115
Pav_co4067545.1_g010.1.br	Pav_co4067545.1	0	0	0	6	5	4	0	0	0	0.182873	0.19033	0.10816	0	0.160454	4.75948	0	Inf	0.015789	0.063957	FALSE	GO:0018130//GO:1901362//GO:0019438//GO:0006725//GO:0043170//GO:0009987//GO:0044237//GO:0090304//GO:0006807//GO:0034641//GO:0097659//GO:0016070//GO:0006351//GO:1901360//GO:0071704//GO:0032774//GO:0009059//GO:0009058//GO:0034645//GO:0008150//GO:0034654//GO:0008152//GO:0044260//GO:0010467//GO:0044249//GO:1901576//GO:0046483//GO:0044238//GO:0006139//GO:0044271	heterocycle biosynthetic process//organic cyclic compound biosynthetic process//aromatic compound biosynthetic process//cellular aromatic compound metabolic process//macromolecule metabolic process//cellular process//cellular metabolic process//nucleic acid metabolic process//nitrogen compound metabolic process//cellular nitrogen compound metabolic process//nucleic acid-templated transcription//R…	--	--	GO:0016772//GO:0016779//GO:0034062//GO:1901363//GO:0097159//GO:0003899//GO:0003674//GO:0005488//GO:0016740//GO:0003824//GO:0003677//GO:0003676	transferase activity, transferring phosphorus-containing groups//nucleotidyltransferase activity//RNA polymerase activity//heterocyclic compound binding//organic cyclic compound binding//DNA-directed RNA polymerase activity//molecular_function//binding//transferase activity//catalytic activity//DNA binding//nucleic acid binding	K02999 DNA-directed RNA polymerase I subunit RPA1 [EC:2.7.7.6] | (RefSeq) hypothetical protein	http://www.genome.jp/dbget-bin/www_bget?pper:PRUPE_ppa000153mg	PREDICTED: DNA-directed RNA polymerase I subunit rpa1
Pav_sc0001341.1_g160.1.mk	Pav_sc0001341.1	1	0	0	12	10	7	0.0509472	0	0	0.584719	0.608562	0.302602	0.0169824	0.498628	9.25305	0.338706	4.7718	0.0011668	0.0077887	UP	--	--	--	--	--	--	K10706 senataxin [EC:3.6.4.-] | (RefSeq) hypothetical protein	http://www.genome.jp/dbget-bin/www_bget?pper:PRUPE_ppa020625mg	PREDICTED: helicase SEN1-like
Pav_sc0000040.1_g980.1.mk	Pav_sc0000040.1	4	0	2	69	24	80	0.229541	0	0.139143	3.787	1.64511	3.89533	0.122895	3.10915	51.0108	2.12618	4.5845	3.9943e-08	8.3585e-07	UP	--	--	--	--	GO:0005515//GO:0005488//GO:0003674	protein binding//binding//molecular_function	no KO assigned | (RefSeq) hypothetical protein	http://www.genome.jp/dbget-bin/www_bget?pper:PRUPE_ppa018019mg	PREDICTED: BAG family molecular chaperone regulator 2
Pav_sc0009979.1_g010.1.br	Pav_sc0009979.1	0	0	0	4	5	6	0	0	0	0.485694	0.758248	0.646342	0	0.630095	4.69437	0	Inf	0.016251	0.065458	FALSE	--	--	--	--	--	--	--	--	-\-
Pav_sc0001025.1_g320.1.br	Pav_sc0001025.1	0	0	0	4	5	6	0	0	0	0.0870319	0.135871	0.115818	0	0.112907	4.69437	0	Inf	0.016251	0.065458	FALSE	GO:0051234//GO:0008104//GO:0045184//GO:0008150//GO:0006810//GO:0033036//GO:0051179//GO:0015031//GO:0071702	establishment of localization//protein localization//establishment of protein localization//biological_process//transport//macromolecule localization//localization//protein transport//organic substance transport	GO:0031224//GO:0044425//GO:0016020//GO:0016021//GO:0005575	intrinsic component of membrane//membrane part//membrane//integral component of membrane//cellular_component	GO:0003674//GO:0005515//GO:0005488	molecular_function//protein binding//binding	--	--	PREDICTED: uncharacterized protein LOC103336314
Pav_sc0000624.1_g1670.1.mk	Pav_sc0000624.1	1	0	1	21	23	8	0.130105	0	0.157733	2.61311	3.57442	0.883156	0.0959461	2.3569	17.1583	0.724384	4.566	0.0006171	0.0045434	UP	--	--	--	--	--	--	no KO assigned | (RefSeq) hypothetical protein	http://www.genome.jp/dbget-bin/www_bget?pper:PRUPE_ppa011626mg	PREDICTED: uncharacterized protein LOC103323665
Pav_sc0011990.1_g020.1.mk	Pav_sc0011990.1	7	3	1	102	78	119	0.598907	0.246741	0.103727	8.34655	7.9715	8.63896	0.316458	8.319	91.8053	3.76715	4.607	4.3708e-24	4.2465e-22	UP	--	--	--	--	--	--	K09131 uncharacterized protein | (RefSeq) hypothetical protein	http://www.genome.jp/dbget-bin/www_bget?pper:PRUPE_ppa010874mg	hypothetical protein CISIN_1g025536mg
Pav_sc0000212.1_g1970.1.mk	Pav_sc0000212.1	0	1	0	4	13	11	0	0.15764	0	0.627355	2.54645	1.53057	0.0525468	1.56813	9.07204	0.336845	4.7513	0.0027674	0.015808	UP	--	--	--	--	--	--	no KO assigned | (RefSeq) hypothetical protein	http://www.genome.jp/dbget-bin/www_bget?pper:PRUPE_ppa015296mg	PREDICTED: uncharacterized protein LOC103340687
Pav_sc0001293.1_g340.1.mk	Pav_sc0001293.1	8	0	0	86	73	42	0.535921	0	0	5.51004	5.84142	2.38734	0.17864	4.5796	64.6499	2.70965	4.5765	2.7833e-07	4.9875e-06	UP	GO:0051234//GO:0044699//GO:0044765//GO:0098662//GO:0008150//GO:0000041//GO:0098655//GO:0006810//GO:0006811//GO:0098660//GO:0030001//GO:0051179//GO:0044763//GO:0034220//GO:0015675//GO:0006812//GO:1902578//GO:0055085//GO:0035444//GO:0009987	establishment of localization//single-organism process//single-organism transport//inorganic cation transmembrane transport//biological_process//transition metal ion transport//cation transmembrane transport//transport//ion transport//inorganic ion transmembrane transport//metal ion transport//localization//single-organism cellular process//ion transmembrane transport//nickel cation transport//ca…	GO:0031224//GO:0044425//GO:0016020//GO:0016021//GO:0005575	intrinsic component of membrane//membrane part//membrane//integral component of membrane//cellular_component	GO:0022857//GO:0022892//GO:0015075//GO:0003674//GO:0008324//GO:0015099//GO:0005488//GO:0046873//GO:0046872//GO:0005215//GO:0043167//GO:0022890//GO:0022891//GO:0046915//GO:0043169	transmembrane transporter activity//substrate-specific transporter activity//ion transmembrane transporter activity//molecular_function//cation transmembrane transporter activity//nickel cation transmembrane transporter activity//binding//metal ion transmembrane transporter activity//metal ion binding//transporter activity//ion binding//inorganic cation transmembrane transporter activity//substra…	no KO assigned | (RefSeq) hypothetical protein	http://www.genome.jp/dbget-bin/www_bget?pper:PRUPE_ppa012766mg	hypothetical protein PRUPE_ppa012766mg
Pav_sc0000716.1_g100.1.br	Pav_sc0000716.1	0	1	0	8	6	16	0	0.16815	0	1.33836	1.25364	2.37471	0.0560499	1.65557	8.92832	0.336845	4.7282	0.0011387	0.0076278	UP	GO:0009987//GO:0044237//GO:0006807//GO:0034641//GO:1901564//GO:0006725//GO:0018130//GO:1901362//GO:0019438//GO:0009058//GO:0033014//GO:0071704//GO:1901360//GO:0008152//GO:0033013//GO:1901566//GO:0008150//GO:0046483//GO:0044271//GO:1901576//GO:0044249	cellular process//cellular metabolic process//nitrogen compound metabolic process//cellular nitrogen compound metabolic process//organonitrogen compound metabolic process//cellular aromatic compound metabolic process//heterocycle biosynthetic process//organic cyclic compound biosynthetic process//aromatic compound biosynthetic process//biosynthetic process//tetrapyrrole biosynthetic process//orga…	--	--	GO:0004852//GO:0016835//GO:0016829//GO:0003674//GO:0016836//GO:0003824	uroporphyrinogen-III synthase activity//carbon-oxygen lyase activity//lyase activity//molecular_function//hydro-lyase activity//catalytic activity	no KO assigned | (RefSeq) hypothetical protein	http://www.genome.jp/dbget-bin/www_bget?pper:PRUPE_ppa014878mg	hypothetical protein PRUPE_ppa014878mg
Pav_sc0000013.1_g130.1.br	Pav_sc0000013.1	0	0	0	7	3	5	0	0	0	0.266824	0.142819	0.169085	0	0.19291	4.56181	0	Inf	0.017256	0.068725	FALSE	GO:0008150//GO:0008152//GO:0044260//GO:0044267//GO:0006468//GO:0006464//GO:0016310//GO:0043412//GO:0044238//GO:0006796//GO:0019538//GO:0043170//GO:0006793//GO:0009987//GO:0044237//GO:0036211//GO:0071704	biological_process//metabolic process//cellular macromolecule metabolic process//cellular protein metabolic process//protein phosphorylation//cellular protein modification process//phosphorylation//macromolecule modification//primary metabolic process//phosphate-containing compound metabolic process//protein metabolic process//macromolecule metabolic process//phosphorus metabolic process//cellula…	--	--	GO:0030554//GO:0003674//GO:0035639//GO:0005488//GO:0097367//GO:0032559//GO:0016301//GO:0016740//GO:0000166//GO:0005524//GO:0004672//GO:0016773//GO:0003824//GO:0036094//GO:0032553//GO:0043168//GO:0001882//GO:0016772//GO:0032549//GO:1901363//GO:0032550//GO:0097159//GO:0017076//GO:0032555//GO:0043167//GO:0001883//GO:1901265	adenyl nucleotide binding//molecular_function//purine ribonucleoside triphosphate binding//binding//carbohydrate derivative binding//adenyl ribonucleotide binding//kinase activity//transferase activity//nucleotide binding//ATP binding//protein kinase activity//phosphotransferase activity, alcohol group as acceptor//catalytic activity//small molecule binding//ribonucleotide binding//anion binding/…	--	--	PREDICTED: probable LRR receptor-like serine/threonine-protein kinase At1g53430
Pav_co4012553.1_g010.1.mk	Pav_co4012553.1	11	12	21	370	321	496	0.743217	0.779406	1.72017	23.9095	25.9067	28.4353	1.08093	26.0838	364.627	15.8672	4.5223	1.1431e-60	6.0492e-58	UP	--	--	--	--	--	--	K15177 RNA polymerase-associated protein LEO1 | (RefSeq) hypothetical protein	http://www.genome.jp/dbget-bin/www_bget?pper:PRUPE_ppa004747mg	-\-
Pav_sc0000759.1_g280.1.mk	Pav_sc0000759.1	0	0	0	5	6	3	0	0	0	0.281957	0.422574	0.150087	0	0.284873	4.57612	0	Inf	0.020138	0.077571	FALSE	GO:0051179//GO:0051234//GO:0006810//GO:0008150	localization//establishment of localization//transport//biological_process	--	--	GO:0017111//GO:0001883//GO:1901265//GO:0043167//GO:0016817//GO:0017076//GO:0097159//GO:0032555//GO:1901363//GO:0032549//GO:0032550//GO:0016887//GO:0016818//GO:0016462//GO:0001882//GO:0005524//GO:0000166//GO:0016740//GO:0003824//GO:0036094//GO:0016787//GO:0043168//GO:0032553//GO:0005488//GO:0097367//GO:0032559//GO:0030554//GO:0035639//GO:0003674	nucleoside-triphosphatase activity//purine nucleoside binding//nucleoside phosphate binding//ion binding//hydrolase activity, acting on acid anhydrides//purine nucleotide binding//organic cyclic compound binding//purine ribonucleotide binding//heterocyclic compound binding//ribonucleoside binding//purine ribonucleoside binding//ATPase activity//hydrolase activity, acting on acid anhydrides, in ph…	--	--	PREDICTED: ABC transporter G family member 29-like
Pav_sc0002231.1_g040.1.br	Pav_sc0002231.1	0	0	0	5	6	3	0	0	0	0.875379	1.31195	0.465967	0	0.884431	4.57612	0	Inf	0.020138	0.077571	FALSE	--	--	--	--	--	--	--	--	hypothetical protein PRUPE_ppa013789mg
Pav_sc0001797.1_g620.1.mk	Pav_sc0001797.1	4	2	0	84	32	42	0.1386	0.0666183	0	2.78374	1.32446	1.23483	0.0684062	1.78101	48.4314	2.02851	4.5774	5.1304e-06	6.9463e-05	UP	GO:0006259//GO:0008150//GO:0034654//GO:0034645//GO:0065007//GO:0044260//GO:0044711//GO:0044255//GO:0008152//GO:0051171//GO:0050794//GO:0031323//GO:0044249//GO:1901576//GO:0044699//GO:0006310//GO:0010467//GO:0010468//GO:0006139//GO:0031326//GO:0051252//GO:0044271//GO:0046483//GO:1903506//GO:0008610//GO:0044238//GO:2000112//GO:0019222//GO:0006725//GO:0043170//GO:0006629//GO:0018130//GO:1901362//GO:…	DNA metabolic process//biological_process//nucleobase-containing compound biosynthetic process//cellular macromolecule biosynthetic process//biological regulation//cellular macromolecule metabolic process//single-organism biosynthetic process//cellular lipid metabolic process//metabolic process//regulation of nitrogen compound metabolic process//regulation of cellular process//regulation of cellu…	--	--	GO:0070567//GO:0016791//GO:0003674//GO:0016788//GO:0005488//GO:0016787//GO:0003677//GO:0003824//GO:0016740//GO:0003676//GO:0016779//GO:0016772//GO:0050518//GO:1901363//GO:0042578//GO:0097159//GO:0000150	cytidylyltransferase activity//phosphatase activity//molecular_function//hydrolase activity, acting on ester bonds//binding//hydrolase activity//DNA binding//catalytic activity//transferase activity//nucleic acid binding//nucleotidyltransferase activity//transferase activity, transferring phosphorus-containing groups//2-C-methyl-D-erythritol 4-phosphate cytidylyltransferase activity//heterocyclic…	K13248 pyridoxal phosphate phosphatase PHOSPHO2 [EC:3.1.3.74] | (RefSeq) hypothetical protein	http://www.genome.jp/dbget-bin/www_bget?pper:PRUPE_ppa021956mg	PREDICTED: inorganic pyrophosphatase 2-like isoform X1
Pav_sc0000355.1_g030.1.br	Pav_sc0000355.1	1	1	0	16	19	16	0.0443456	0.0426295	0	0.678604	1.00644	0.602038	0.0289917	0.762361	16.2692	0.675551	4.5899	1.2698e-05	0.00015658	UP	--	--	--	--	--	--	K19027 zinc finger FYVE domain-containing protein 26 | (RefSeq) hypothetical protein	http://www.genome.jp/dbget-bin/www_bget?pper:PRUPE_ppa000020mg	-\-
Pav_sc0002573.1_g050.1.br	Pav_sc0002573.1	0	3	0	35	23	19	0	0.271859	0	3.15556	2.58985	1.51974	0.0906196	2.42172	24.2618	1.01054	4.5855	7.1405e-08	1.4276e-06	UP	--	--	--	--	GO:0003676//GO:0005488//GO:0003674//GO:0097159//GO:1901363//GO:0003723	nucleic acid binding//binding//molecular_function//organic cyclic compound binding//heterocyclic compound binding//RNA binding	no KO assigned | (RefSeq) hypothetical protein	http://www.genome.jp/dbget-bin/www_bget?pper:PRUPE_ppa018827mg	PREDICTED: putative ribonuclease H protein At1g65750
Pav_sc0001335.1_g030.1.br	Pav_sc0001335.1	0	0	0	7	5	2	0	0	0	0.702637	0.626819	0.178103	0	0.50252	4.52612	0	Inf	0.020576	0.078853	FALSE	--	--	--	--	--	--	--	--	PREDICTED: cyclic nucleotide-gated ion channel 1-like
Pav_sc0000780.1_g030.1.mk	Pav_sc0000780.1	0	0	0	4	3	8	0	0	0	0.0523098	0.0489986	0.0928157	0	0.064708	4.46416	0	Inf	0.018054	0.071366	FALSE	GO:0044699//GO:0008150//GO:0007017//GO:0006928//GO:0044763//GO:0007018//GO:0009987	single-organism process//biological_process//microtubule-based process//movement of cell or subcellular component//single-organism cellular process//microtubule-based movement//cellular process	--	--	GO:0036094//GO:0016787//GO:0043168//GO:0032553//GO:0005524//GO:0000166//GO:0003824//GO:0008092//GO:0016818//GO:0016462//GO:0001882//GO:0030554//GO:0003674//GO:0035639//GO:0097367//GO:0032559//GO:0032403//GO:0005488//GO:0008017//GO:0005515//GO:0097159//GO:0017076//GO:0032555//GO:0016817//GO:0003774//GO:0015631//GO:0001883//GO:1901265//GO:0043167//GO:0003682//GO:0017111//GO:0003777//GO:0032550//GO:…	small molecule binding//hydrolase activity//anion binding//ribonucleotide binding//ATP binding//nucleotide binding//catalytic activity//cytoskeletal protein binding//hydrolase activity, acting on acid anhydrides, in phosphorus-containing anhydrides//pyrophosphatase activity//nucleoside binding//adenyl nucleotide binding//molecular_function//purine ribonucleoside triphosphate binding//carbohydrate…	--	--	PREDICTED: 125 kDa kinesin-related protein
Pav_sc0001796.1_g010.1.br	Pav_sc0001796.1	0	0	0	7	2	6	0	0	0	0.774968	0.276538	0.589311	0	0.546939	4.44671	0	Inf	0.018202	0.07186	FALSE	--	--	--	--	--	--	--	--	-\-
Pav_sc0000582.1_g630.1.mk	Pav_sc0000582.1	0	1	0	13	7	8	0	0.0245673	0	0.317751	0.213688	0.173477	0.00818911	0.234972	8.67437	0.336845	4.6866	0.0016848	0.010576	UP	GO:0071704//GO:0044238//GO:0005975//GO:0008152//GO:0008150	organic substance metabolic process//primary metabolic process//carbohydrate metabolic process//metabolic process//biological_process	--	--	GO:0016798//GO:0004553//GO:0003824//GO:0016787//GO:0003674	hydrolase activity, acting on glycosyl bonds//hydrolase activity, hydrolyzing O-glycosyl compounds//catalytic activity//hydrolase activity//molecular_function	K01179 endoglucanase [EC:3.2.1.4] | (RefSeq) hypothetical protein	http://www.genome.jp/dbget-bin/www_bget?pper:PRUPE_ppa004719mg	PREDICTED: endoglucanase 9
Pav_sc0002231.1_g050.1.br	Pav_sc0002231.1	40	17	8	569	712	264	7.32218	2.9915	1.77542	99.6181	155.684	41.0051	4.0297	98.7692	511.307	22.36	4.5152	9.187e-05	0.00089678	UP	--	--	--	--	--	--	no KO assigned | (RefSeq) hypothetical protein	http://www.genome.jp/dbget-bin/www_bget?pper:PRUPE_ppa013789mg	hypothetical protein PRUPE_ppa013789mg
Pav_sc0000099.1_g310.1.mk	Pav_sc0000099.1	3	1	0	35	35	30	0.0884973	0.0283575	0	0.987467	1.23328	0.750903	0.0389516	0.990549	31.7589	1.35296	4.553	8.9882e-10	2.4116e-08	UP	GO:0006950//GO:0008152//GO:0009987//GO:0044237//GO:0006807//GO:0051716//GO:0034641//GO:0050896//GO:0006811//GO:0044260//GO:0090304//GO:0006810//GO:0033554//GO:1902578//GO:0006725//GO:0006259//GO:0043170//GO:0008150//GO:0044763//GO:0046483//GO:0044238//GO:0006281//GO:0051179//GO:0044765//GO:0006139//GO:0044699//GO:0006310//GO:0051234//GO:0044710//GO:0071704//GO:0006974//GO:1901360	response to stress//metabolic process//cellular process//cellular metabolic process//nitrogen compound metabolic process//cellular response to stimulus//cellular nitrogen compound metabolic process//response to stimulus//ion transport//cellular macromolecule metabolic process//nucleic acid metabolic process//transport//cellular response to stress//single-organism localization//cellular aromatic c…	GO:0005575//GO:0016020	cellular_component//membrane	GO:0032549//GO:1901363//GO:0005488//GO:0005216//GO:0097367//GO:0032550//GO:0032559//GO:0035639//GO:0015075//GO:0003674//GO:0016887//GO:0022891//GO:0003723//GO:0030554//GO:0022892//GO:0003724//GO:0017111//GO:0003678//GO:0003676//GO:0022838//GO:0043167//GO:0001883//GO:1901265//GO:0001882//GO:0016462//GO:0016818//GO:0015267//GO:0009378//GO:0022803//GO:0003824//GO:0016817//GO:0005215//GO:0000166//GO:…	ribonucleoside binding//heterocyclic compound binding//binding//ion channel activity//carbohydrate derivative binding//purine ribonucleoside binding//adenyl ribonucleotide binding//purine ribonucleoside triphosphate binding//ion transmembrane transporter activity//molecular_function//ATPase activity//substrate-specific transmembrane transporter activity//RNA binding//adenyl nucleotide binding//su…	K08900 mitochondrial chaperone BCS1 | (RefSeq) hypothetical protein	http://www.genome.jp/dbget-bin/www_bget?pper:PRUPE_ppa006102mg	PREDICTED: probable mitochondrial chaperone BCS1-B
Pav_sc0004613.1_g020.1.mk	Pav_sc0004613.1	6	8	11	214	148	296	0.548101	0.702521	1.21824	18.6969	16.1494	22.9433	0.822954	19.2632	198.97	8.96946	4.4714	2.5827e-36	4.7232e-34	UP	GO:0044419//GO:0016032//GO:0019058//GO:0051704//GO:0044764//GO:0008150//GO:0009987//GO:0044403	interspecies interaction between organisms//viral process//viral life cycle//multi-organism process//multi-organism cellular process//biological_process//cellular process//symbiosis, encompassing mutualism through parasitism	--	--	--	--	no KO assigned | (RefSeq) hypothetical protein	http://www.genome.jp/dbget-bin/www_bget?pper:PRUPE_ppa025310mg	PREDICTED: TMV resistance protein N-like isoform X1
Pav_sc0000259.1_g150.1.br	Pav_sc0000259.1	0	0	0	6	4	4	0	0	0	0.143852	0.119774	0.0850811	0	0.116236	4.37846	0	Inf	0.021956	0.082978	FALSE	--	--	--	--	--	--	--	--	PREDICTED: uncharacterized protein LOC103334711
Pav_sc0010434.1_g010.1.br	Pav_sc0010434.1	0	0	0	6	4	4	0	0	0	0.340474	0.283486	0.201373	0	0.275111	4.37846	0	Inf	0.021956	0.082978	FALSE	--	--	--	--	GO:0005515//GO:0005488//GO:0003674	protein binding//binding//molecular_function	--	--	PREDICTED: putative disease resistance protein RGA3, partial
Pav_sc0001212.1_g010.1.mk	Pav_sc0001212.1	0	0	0	5	4	5	0	0	0	0.372686	0.372368	0.330637	0	0.358563	4.34591	0	Inf	0.022278	0.083916	FALSE	GO:0036211//GO:0071704//GO:0006793//GO:0009987//GO:0044237//GO:0043170//GO:0019538//GO:0044238//GO:0006796//GO:0016310//GO:0043412//GO:0008152//GO:0006468//GO:0044260//GO:0044267//GO:0006464//GO:0008150	protein modification process//organic substance metabolic process//phosphorus metabolic process//cellular process//cellular metabolic process//macromolecule metabolic process//protein metabolic process//primary metabolic process//phosphate-containing compound metabolic process//phosphorylation//macromolecule modification//metabolic process//protein phosphorylation//cellular macromolecule metaboli…	--	--	GO:0043167//GO:0001883//GO:1901265//GO:0097159//GO:0017076//GO:0032555//GO:1901363//GO:0032549//GO:0032550//GO:0016772//GO:0001882//GO:0000166//GO:0005524//GO:0016740//GO:0016773//GO:0003824//GO:0004672//GO:0036094//GO:0043168//GO:0032553//GO:0005488//GO:0097367//GO:0032559//GO:0016301//GO:0030554//GO:0003674//GO:0035639	ion binding//purine nucleoside binding//nucleoside phosphate binding//organic cyclic compound binding//purine nucleotide binding//purine ribonucleotide binding//heterocyclic compound binding//ribonucleoside binding//purine ribonucleoside binding//transferase activity, transferring phosphorus-containing groups//nucleoside binding//nucleotide binding//ATP binding//transferase activity//phosphotrans…	--	--	PREDICTED: probable LRR receptor-like serine/threonine-protein kinase At3g47570
Pav_sc0001305.1_g030.1.mk	Pav_sc0001305.1	6	0	1	82	45	49	0.338552	0	0.0684077	4.42521	3.03299	2.34598	0.135653	3.26806	54.649	2.41791	4.4984	7.7307e-11	2.3915e-09	UP	GO:0065007//GO:0044260//GO:0051171//GO:0008152//GO:0008150//GO:0034654//GO:0034645//GO:0051252//GO:0044271//GO:0031326//GO:0006139//GO:1903506//GO:0046483//GO:0044238//GO:0031323//GO:0044249//GO:1901576//GO:0050794//GO:0010468//GO:0010467//GO:2001141//GO:0090304//GO:0006807//GO:0034641//GO:0006355//GO:0009889//GO:0044237//GO:0009987//GO:0019219//GO:0018130//GO:0019438//GO:1901362//GO:0006725//GO:…	biological regulation//cellular macromolecule metabolic process//regulation of nitrogen compound metabolic process//metabolic process//biological_process//nucleobase-containing compound biosynthetic process//cellular macromolecule biosynthetic process//regulation of RNA metabolic process//cellular nitrogen compound biosynthetic process//regulation of cellular biosynthetic process//nucleobase-cont…	--	--	GO:0005488//GO:0003674//GO:0003676//GO:0003677//GO:1901363//GO:0097159	binding//molecular_function//nucleic acid binding//DNA binding//heterocyclic compound binding//organic cyclic compound binding	no KO assigned | (RefSeq) hypothetical protein	http://www.genome.jp/dbget-bin/www_bget?pper:PRUPE_ppa020903mg	PREDICTED: dof zinc finger protein DOF1.4-like
Pav_sc0003570.1_g010.1.br	Pav_sc0003570.1	0	0	0	4	4	6	0	0	0	0.501884	0.626819	0.667886	0	0.598863	4.31336	0	Inf	0.022607	0.084822	FALSE	--	--	--	--	--	--	--	--	-\-
Pav_sc0000549.1_g950.1.mk	Pav_sc0000549.1	0	0	0	7	3	4	0	0	0	0.439148	0.235057	0.222629	0	0.298945	4.29591	0	Inf	0.022787	0.08529	FALSE	GO:0044699//GO:0055114//GO:0008152//GO:0008150//GO:0044710	single-organism process//oxidation-reduction process//metabolic process//biological_process//single-organism metabolic process	GO:0043234//GO:0005623//GO:0043231//GO:1902494//GO:0043229//GO:0044464//GO:0005634//GO:0005680//GO:0043226//GO:0000152//GO:0000151//GO:0032991//GO:0044446//GO:0044424//GO:0031461//GO:0044428//GO:1990234//GO:0005575//GO:0005622//GO:0044422//GO:0043227	protein complex//cell//intracellular membrane-bounded organelle//catalytic complex//intracellular organelle//cell part//nucleus//anaphase-promoting complex//organelle//nuclear ubiquitin ligase complex//ubiquitin ligase complex//macromolecular complex//intracellular organelle part//intracellular part//cullin-RING ubiquitin ligase complex//nuclear part//transferase complex//cellular_component//intr…	GO:0016740//GO:0003824//GO:0019787//GO:0008270//GO:0005488//GO:0005515//GO:0003674//GO:0043167//GO:0046872//GO:0016491//GO:0004842//GO:0046914//GO:0043169//GO:0016638	transferase activity//catalytic activity//ubiquitin-like protein transferase activity//zinc ion binding//binding//protein binding//molecular_function//ion binding//metal ion binding//oxidoreductase activity//ubiquitin-protein transferase activity//transition metal ion binding//cation binding//oxidoreductase activity, acting on the CH-NH2 group of donors	--	--	PREDICTED: E3 ubiquitin-protein ligase AIP2-like
Pav_sc0001412.1_g210.1.mk	Pav_sc0001412.1	0	0	0	7	3	4	0	0	0	0.19737	0.105644	0.100058	0	0.134357	4.29591	0	Inf	0.022787	0.08529	FALSE	GO:0044710//GO:0044699//GO:0008150//GO:0055114//GO:0008152	single-organism metabolic process//single-organism process//biological_process//oxidation-reduction process//metabolic process	--	--	GO:0097159//GO:0046872//GO:0016491//GO:0046914//GO:0005506//GO:0043167//GO:0046906//GO:0016705//GO:0043169//GO:1901363//GO:0003824//GO:0020037//GO:0003674//GO:0005488	organic cyclic compound binding//metal ion binding//oxidoreductase activity//transition metal ion binding//iron ion binding//ion binding//tetrapyrrole binding//oxidoreductase activity, acting on paired donors, with incorporation or reduction of molecular oxygen//cation binding//heterocyclic compound binding//catalytic activity//heme binding//molecular_function//binding	--	--	cytochrome P450 71AU50
Pav_sc0000030.1_g1040.1.mk	Pav_sc0000030.1	0	1	0	7	14	4	0	0.0957814	0	0.667061	1.66623	0.33817	0.0319271	0.890486	8.48708	0.336845	4.6551	0.019313	0.07508	FALSE	GO:0044763//GO:0050789//GO:0044699//GO:0007165//GO:0044700//GO:0050794//GO:0007154//GO:0009987//GO:0050896//GO:0065007//GO:0051716//GO:0008150//GO:0023052	single-organism cellular process//regulation of biological process//single-organism process//signal transduction//single organism signaling//regulation of cellular process//cell communication//cellular process//response to stimulus//biological regulation//cellular response to stimulus//biological_process//signaling	GO:0044421//GO:0005575//GO:0031012//GO:0005576//GO:0005578	extracellular region part//cellular_component//extracellular matrix//extracellular region//proteinaceous extracellular matrix	GO:0043167//GO:0005509//GO:0046872//GO:0005488//GO:0005515//GO:0043169//GO:0003674	ion binding//calcium ion binding//metal ion binding//binding//protein binding//cation binding//molecular_function	--	--	PREDICTED: probable calcium-binding protein CML29
Pav_sc0001503.1_g030.1.br	Pav_sc0001503.1	3	1	1	27	27	76	0.0438923	0.0140646	0.0177377	0.377812	0.471862	0.943483	0.0252315	0.597719	38.5549	1.73864	4.4709	1.6099e-05	0.00019325	UP	--	--	--	--	GO:0005488//GO:0005515//GO:0003674	binding//protein binding//molecular_function	no KO assigned | (RefSeq) hypothetical protein	http://www.genome.jp/dbget-bin/www_bget?pper:PRUPE_ppa015767mg	PREDICTED: receptor-like protein 12
Pav_sc0001328.1_g240.1.br	Pav_sc0001328.1	0	0	0	3	4	7	0	0	0	0.0871999	0.145209	0.18051	0	0.13764	4.2808	0	Inf	0.022944	0.085761	FALSE	GO:0044249//GO:1901576//GO:1902589//GO:0006732//GO:0019720//GO:1901360//GO:0006974//GO:0071704//GO:0044710//GO:0006777//GO:0044699//GO:0006139//GO:0051189//GO:0016043//GO:0090407//GO:0009058//GO:0006796//GO:0051276//GO:0006281//GO:0044238//GO:0019637//GO:0046483//GO:0044763//GO:0065008//GO:1901362//GO:0008150//GO:0018130//GO:0071840//GO:0060249//GO:0043170//GO:0006259//GO:0019538//GO:0006725//GO:…	cellular biosynthetic process//organic substance biosynthetic process//single-organism organelle organization//coenzyme metabolic process//Mo-molybdopterin cofactor metabolic process//organic cyclic compound metabolic process//cellular response to DNA damage stimulus//organic substance metabolic process//single-organism metabolic process//Mo-molybdopterin cofactor biosynthetic process//single-org…	--	--	GO:0036094//GO:0097159//GO:0017076//GO:0005525//GO:0004386//GO:0016787//GO:0042578//GO:0032555//GO:0043168//GO:0032553//GO:0005524//GO:0000166//GO:0016817//GO:0016740//GO:0003824//GO:0019001//GO:0016818//GO:0016462//GO:0003924//GO:0001882//GO:0043531//GO:1901265//GO:0001883//GO:0043167//GO:0003678//GO:0017111//GO:0016791//GO:0032561//GO:0016788//GO:0030554//GO:0016772//GO:0003674//GO:0035639//GO:…	small molecule binding//organic cyclic compound binding//purine nucleotide binding//GTP binding//helicase activity//hydrolase activity//phosphoric ester hydrolase activity//purine ribonucleotide binding//anion binding//ribonucleotide binding//ATP binding//nucleotide binding//hydrolase activity, acting on acid anhydrides//transferase activity//catalytic activity//guanyl nucleotide binding//hydrola…	--	--	PREDICTED: disease resistance protein At4g27190-like
Pav_sc0001141.1_g110.1.br	Pav_sc0001141.1	0	1	1	24	15	10	0	0.0731085	0.0922017	1.74568	1.36265	0.645301	0.0551034	1.25121	15.5374	0.722524	4.4266	2.1628e-05	0.00025066	UP	GO:0048870//GO:0001539//GO:0044763//GO:0006928//GO:0071973//GO:0040011//GO:0051179//GO:0097588//GO:0044699//GO:0051674//GO:0009987//GO:0008150	cell motility//cilium or flagellum-dependent cell motility//single-organism cellular process//movement of cell or subcellular component//bacterial-type flagellum-dependent cell motility//locomotion//localization//archaeal or bacterial-type flagellum-dependent cell motility//single-organism process//localization of cell//cellular process//biological_process	--	--	--	--	no KO assigned | (RefSeq) hypothetical protein	http://www.genome.jp/dbget-bin/www_bget?pper:PRUPE_ppa015057mg	PREDICTED: uncharacterized protein LOC103321434
Pav_sc0001215.1_g500.1.mk	Pav_sc0001215.1	1	0	0	16	5	6	0.0280618	0	0	0.429419	0.167599	0.142863	0.00935394	0.246627	8.2759	0.338706	4.6108	0.0034199	0.018839	UP	--	--	--	--	GO:0035639//GO:0003674//GO:0016887//GO:0030554//GO:0097367//GO:0032550//GO:0032559//GO:0032549//GO:1901363//GO:0005488//GO:0032553//GO:0043168//GO:0032555//GO:0016787//GO:0017076//GO:0036094//GO:0097159//GO:0003824//GO:0016817//GO:0000166//GO:0005524//GO:0043167//GO:0001883//GO:1901265//GO:0043531//GO:0001882//GO:0016462//GO:0016818//GO:0017111	purine ribonucleoside triphosphate binding//molecular_function//ATPase activity//adenyl nucleotide binding//carbohydrate derivative binding//purine ribonucleoside binding//adenyl ribonucleotide binding//ribonucleoside binding//heterocyclic compound binding//binding//ribonucleotide binding//anion binding//purine ribonucleotide binding//hydrolase activity//purine nucleotide binding//small molecule …	no KO assigned | (RefSeq) hypothetical protein	http://www.genome.jp/dbget-bin/www_bget?pper:PRUPE_ppa015199mg	PREDICTED: probable disease resistance protein At5g45490
Pav_sc0000502.1_g400.1.mk	Pav_sc0000502.1	0	0	0	5	3	6	0	0	0	0.450794	0.337806	0.479918	0	0.42284	4.2308	0	Inf	0.023475	0.087296	FALSE	GO:0044271//GO:0051252//GO:0006139//GO:0031326//GO:1903506//GO:0046483//GO:0044238//GO:1901576//GO:0044249//GO:0031323//GO:0050794//GO:0010467//GO:0010468//GO:0044260//GO:0065007//GO:0008152//GO:0051171//GO:0008150//GO:0034654//GO:0034645//GO:0009058//GO:0060255//GO:0010556//GO:0009059//GO:1901360//GO:0080090//GO:0032774//GO:0071704//GO:0016070//GO:0097659//GO:0050789//GO:0006351//GO:2001141//GO:…	cellular nitrogen compound biosynthetic process//regulation of RNA metabolic process//nucleobase-containing compound metabolic process//regulation of cellular biosynthetic process//regulation of nucleic acid-templated transcription//heterocycle metabolic process//primary metabolic process//organic substance biosynthetic process//cellular biosynthetic process//regulation of cellular metabolic proc…	--	--	GO:0003700//GO:0001071//GO:0003674	transcription factor activity, sequence-specific DNA binding//nucleic acid binding transcription factor activity//molecular_function	no KO assigned | (RefSeq) hypothetical protein	http://www.genome.jp/dbget-bin/www_bget?pper:PRUPE_ppa020605mg	PREDICTED: ethylene-responsive transcription factor ERF020
Pav_sc0002053.1_g130.1.br	Pav_sc0002053.1	0	1	0	4	8	15	0	0.144128	0	0.573582	1.43273	1.90825	0.0480428	1.30485	8.2306	0.336845	4.6108	0.0023117	0.013652	UP	--	--	--	--	--	--	--	--	-\-
Pav_co4055141.1_g010.1.br	Pav_co4055141.1	0	0	0	4	3	7	0	0	0	0.251992	0.236041	0.391231	0	0.293088	4.19825	0	Inf	0.023831	0.088347	FALSE	GO:0016310//GO:0036211//GO:0043412//GO:0071704//GO:0044238//GO:0006796//GO:0008150//GO:0043170//GO:0019538//GO:0006793//GO:0044237//GO:0009987//GO:0008152//GO:0006468//GO:0044267//GO:0044260//GO:0006464	phosphorylation//protein modification process//macromolecule modification//organic substance metabolic process//primary metabolic process//phosphate-containing compound metabolic process//biological_process//macromolecule metabolic process//protein metabolic process//phosphorus metabolic process//cellular metabolic process//cellular process//metabolic process//protein phosphorylation//cellular pr…	--	--	GO:0005524//GO:0000166//GO:0016740//GO:0003824//GO:0016773//GO:0004672//GO:0017076//GO:0036094//GO:0097159//GO:0043168//GO:0032555//GO:0032553//GO:0001882//GO:0001883//GO:1901265//GO:0043167//GO:0030554//GO:0016772//GO:0035639//GO:0003674//GO:0005488//GO:1901363//GO:0032549//GO:0097367//GO:0032559//GO:0032550//GO:0016301	ATP binding//nucleotide binding//transferase activity//catalytic activity//phosphotransferase activity, alcohol group as acceptor//protein kinase activity//purine nucleotide binding//small molecule binding//organic cyclic compound binding//anion binding//purine ribonucleotide binding//ribonucleotide binding//nucleoside binding//purine nucleoside binding//nucleoside phosphate binding//ion binding/…	--	--	PREDICTED: G-type lectin S-receptor-like serine/threonine-protein kinase RLK1
Pav_sc0000848.1_g250.1.mk	Pav_sc0000848.1	0	0	0	4	3	7	0	0	0	0.239945	0.224756	0.372526	0	0.279075	4.19825	0	Inf	0.023831	0.088347	FALSE	--	--	--	--	--	--	--	--	hypothetical protein PRUPE_ppa015066mg, partial
Pav_sc0000182.1_g040.1.br	Pav_sc0000182.1	0	0	0	4	3	7	0	0	0	0.200754	0.188046	0.31168	0	0.233493	4.19825	0	Inf	0.023831	0.088347	FALSE	--	--	--	--	GO:0003674//GO:0005515//GO:0005488	molecular_function//protein binding//binding	--	--	PREDICTED: uncharacterized protein LOC103339655
Pav_sc0002264.1_g040.1.br	Pav_sc0002264.1	1	0	0	8	6	13	0.0223301	0	0	0.170854	0.160039	0.246313	0.00744335	0.192402	8.13059	0.338706	4.5853	0.0023999	0.014067	UP	--	--	--	--	GO:0005488//GO:0005515//GO:0003674	binding//protein binding//molecular_function	no KO assigned | (RefSeq) hypothetical protein	http://www.genome.jp/dbget-bin/www_bget?pper:PRUPE_ppa025449mg	PREDICTED: receptor-like protein 2
Pav_sc0007386.1_g020.1.br	Pav_sc0007386.1	0	0	0	3	3	8	0	0	0	0.264149	0.329905	0.624923	0	0.406326	4.1657	0	Inf	0.024194	0.089373	FALSE	GO:0015711//GO:0098656//GO:0006811//GO:0071705//GO:0006810//GO:0042886//GO:0008150//GO:0015849//GO:0035442//GO:0003333//GO:0044765//GO:0006820//GO:0072337//GO:0044699//GO:0042938//GO:0051234//GO:0071702//GO:0035672//GO:0009987//GO:0055085//GO:0006865//GO:0006835//GO:1902604//GO:1902578//GO:0015814//GO:1903825//GO:0006857//GO:0034220//GO:0044763//GO:0046942//GO:0051179//GO:0015833	organic anion transport//anion transmembrane transport//ion transport//nitrogen compound transport//transport//amide transport//biological_process//organic acid transport//dipeptide transmembrane transport//amino acid transmembrane transport//single-organism transport//anion transport//modified amino acid transport//single-organism process//dipeptide transport//establishment of localization//orga…	--	--	GO:0035673//GO:0003674//GO:0015075//GO:0042887//GO:0008509//GO:0022892//GO:0015569//GO:0022857//GO:0046943//GO:0072349//GO:0071916//GO:0015563//GO:0015197//GO:0005342//GO:0015558//GO:0022891//GO:0008514//GO:0042936//GO:0005310//GO:0005215//GO:0015198	oligopeptide transmembrane transporter activity//molecular_function//ion transmembrane transporter activity//amide transmembrane transporter activity//anion transmembrane transporter activity//substrate-specific transporter activity//p-aminobenzoyl-glutamate transmembrane transporter activity//transmembrane transporter activity//carboxylic acid transmembrane transporter activity//modified amino a…	--	--	-\-
Pav_sc0012450.1_g010.1.br	Pav_sc0012450.1	0	2	0	20	11	18	0	0.0634527	0	0.631301	0.433648	0.504065	0.0211509	0.523005	14.9467	0.673691	4.4716	2.7133e-05	0.00030717	UP	GO:0044260//GO:0044267//GO:0006468//GO:0006464//GO:0008152//GO:0008150//GO:0006796//GO:0044238//GO:0043412//GO:0016310//GO:0006793//GO:0044237//GO:0009987//GO:0019538//GO:0043170//GO:0071704//GO:0036211	cellular macromolecule metabolic process//cellular protein metabolic process//protein phosphorylation//cellular protein modification process//metabolic process//biological_process//phosphate-containing compound metabolic process//primary metabolic process//macromolecule modification//phosphorylation//phosphorus metabolic process//cellular metabolic process//cellular process//protein metabolic pro…	--	--	GO:0032559//GO:0097367//GO:0016301//GO:0005488//GO:0005515//GO:0030554//GO:0003674//GO:0035639//GO:0001882//GO:0036094//GO:0032553//GO:0043168//GO:0016740//GO:0005524//GO:0000166//GO:0004672//GO:0003824//GO:0016773//GO:0032550//GO:0032549//GO:1901363//GO:0016772//GO:1901265//GO:0001883//GO:0043167//GO:0097159//GO:0017076//GO:0032555	adenyl ribonucleotide binding//carbohydrate derivative binding//kinase activity//binding//protein binding//adenyl nucleotide binding//molecular_function//purine ribonucleoside triphosphate binding//nucleoside binding//small molecule binding//ribonucleotide binding//anion binding//transferase activity//ATP binding//nucleotide binding//protein kinase activity//catalytic activity//phosphotransferase…	no KO assigned | (RefSeq) hypothetical protein	http://www.genome.jp/dbget-bin/www_bget?pper:PRUPE_ppa022443mg	PREDICTED: probable LRR receptor-like serine/threonine-protein kinase At3g47570
Pav_sc0000218.1_g020.1.br	Pav_sc0000218.1	7	0	1	70	44	82	0.368558	0	0.0638319	3.52494	2.76723	3.66332	0.14413	3.3185	59.4614	2.75662	4.431	1.233e-16	7.0018e-15	UP	--	--	--	--	--	--	K20403 TELO2-interacting protein 1 | (RefSeq) hypothetical protein	http://www.genome.jp/dbget-bin/www_bget?pper:PRUPE_ppa020909mg	hypothetical protein PRUPE_ppa020909mg, partial
Pav_sc0001124.1_g410.1.mk	Pav_sc0001124.1	2	0	0	23	11	14	0.0732786	0	0	0.805973	0.48142	0.43524	0.0244262	0.574211	14.7785	0.677412	4.4473	3.32e-05	0.00036651	UP	GO:0009888//GO:0008544//GO:0060429//GO:0008150//GO:0008152//GO:0048856//GO:0032502	tissue development//epidermis development//epithelium development//biological_process//metabolic process//anatomical structure development//developmental process	--	--	GO:0003824//GO:0003674	catalytic activity//molecular_function	no KO assigned | (RefSeq) hypothetical protein	http://www.genome.jp/dbget-bin/www_bget?pper:PRUPE_ppa004139mg	PREDICTED: butyrate--CoA ligase AAE11, peroxisomal-like
Novel00995	Pav_sc0007054.1	1	0	1	27	6	17	0.0633084	0	0.0767523	1.63482	0.453729	0.913196	0.0466869	1.00058	14.865	0.724384	4.359	0.00064775	0.0047412	UP	GO:0006807//GO:0034641//GO:0006518//GO:0044237//GO:0009987//GO:0019538//GO:0043170//GO:1901564//GO:0016485//GO:0071704//GO:0051604//GO:0043603//GO:0044260//GO:0044267//GO:0006508//GO:0008152//GO:0008150//GO:0006465//GO:0044238//GO:0010467	nitrogen compound metabolic process//cellular nitrogen compound metabolic process//peptide metabolic process//cellular metabolic process//cellular process//protein metabolic process//macromolecule metabolic process//organonitrogen compound metabolic process//protein processing//organic substance metabolic process//protein maturation//cellular amide metabolic process//cellular macromolecule metabo…	GO:0031090//GO:0016021//GO:0098588//GO:0005575//GO:0005622//GO:0016020//GO:0044422//GO:0043227//GO:0032991//GO:0044444//GO:0044446//GO:0044424//GO:0044425//GO:1990234//GO:0042175//GO:0005737//GO:0043229//GO:1902494//GO:0005787//GO:0043231//GO:0044464//GO:0005789//GO:0098796//GO:0043226//GO:0005783//GO:0044432//GO:0031224//GO:0043234//GO:0005623//GO:0012505	organelle membrane//integral component of membrane//bounding membrane of organelle//cellular_component//intracellular//membrane//organelle part//membrane-bounded organelle//macromolecular complex//cytoplasmic part//intracellular organelle part//intracellular part//membrane part//transferase complex//nuclear outer membrane-endoplasmic reticulum membrane network//cytoplasm//intracellular organelle/…	GO:0008233//GO:0003674//GO:0016787//GO:0003824	peptidase activity//molecular_function//hydrolase activity//catalytic activity	K01115 phospholipase D1/2 [EC:3.1.4.4] | (RefSeq) hypothetical protein	http://www.genome.jp/dbget-bin/www_bget?pper:PRUPE_ppa000572mg	--
Pav_sc0000037.1_g320.1.br	Pav_sc0000037.1	3	0	0	30	17	25	0.0446812	0	0	0.427337	0.302439	0.315935	0.0148937	0.34857	22.0788	1.01612	4.4415	3.0322e-07	5.3946e-06	UP	GO:0016310//GO:0043412//GO:0044238//GO:0006796//GO:0008150//GO:0008152//GO:0006468//GO:0044267//GO:0044260//GO:0006464//GO:0036211//GO:0071704//GO:0043170//GO:0019538//GO:0006793//GO:0009987//GO:0044237	phosphorylation//macromolecule modification//primary metabolic process//phosphate-containing compound metabolic process//biological_process//metabolic process//protein phosphorylation//cellular protein metabolic process//cellular macromolecule metabolic process//cellular protein modification process//protein modification process//organic substance metabolic process//macromolecule metabolic proces…	--	--	GO:0000166//GO:0005524//GO:0016740//GO:0016773//GO:0003824//GO:0004672//GO:0036094//GO:0043168//GO:0032553//GO:0001882//GO:0030554//GO:0035639//GO:0003674//GO:0005488//GO:0005515//GO:0097367//GO:0032559//GO:0016301//GO:0017076//GO:0097159//GO:0032555//GO:0043167//GO:0001883//GO:1901265//GO:0016772//GO:1901363//GO:0032549//GO:0032550	nucleotide binding//ATP binding//transferase activity//phosphotransferase activity, alcohol group as acceptor//catalytic activity//protein kinase activity//small molecule binding//anion binding//ribonucleotide binding//nucleoside binding//adenyl nucleotide binding//purine ribonucleoside triphosphate binding//molecular_function//binding//protein binding//carbohydrate derivative binding//adenyl rib…	no KO assigned | (RefSeq) hypothetical protein	http://www.genome.jp/dbget-bin/www_bget?pper:PRUPE_ppa025151mg	PREDICTED: putative receptor-like protein kinase At3g47110
Pav_sc0000704.1_g390.1.mk	Pav_sc0000704.1	13	17	21	416	344	455	0.16844	0.211744	0.329877	5.15515	5.32409	5.00228	0.236687	5.16051	376.217	18.2288	4.3673	4.826e-59	2.1824e-56	UP	GO:0006464//GO:0006468//GO:0044267//GO:0044260//GO:0044237//GO:0009987//GO:0008152//GO:0006793//GO:0043170//GO:0019538//GO:0008150//GO:0006796//GO:0044238//GO:0071704//GO:0043412//GO:0016310//GO:0036211	cellular protein modification process//protein phosphorylation//cellular protein metabolic process//cellular macromolecule metabolic process//cellular metabolic process//cellular process//metabolic process//phosphorus metabolic process//macromolecule metabolic process//protein metabolic process//biological_process//phosphate-containing compound metabolic process//primary metabolic process//organi…	--	--	GO:0016301//GO:0097367//GO:0032550//GO:0032559//GO:1901363//GO:0032549//GO:0005515//GO:0005488//GO:0035639//GO:0003674//GO:0030554//GO:0016772//GO:0001882//GO:0001883//GO:1901265//GO:0043167//GO:0043168//GO:0032555//GO:0032553//GO:0017076//GO:0097159//GO:0036094//GO:0003824//GO:0016773//GO:0004672//GO:0005524//GO:0000166//GO:0016740	kinase activity//carbohydrate derivative binding//purine ribonucleoside binding//adenyl ribonucleotide binding//heterocyclic compound binding//ribonucleoside binding//protein binding//binding//purine ribonucleoside triphosphate binding//molecular_function//adenyl nucleotide binding//transferase activity, transferring phosphorus-containing groups//nucleoside binding//purine nucleoside binding//nuc…	no KO assigned | (RefSeq) hypothetical protein	http://www.genome.jp/dbget-bin/www_bget?pper:PRUPE_ppa000872mg	PREDICTED: uncharacterized protein LOC103341044
Pav_sc0000383.1_g130.1.mk	Pav_sc0000383.1	0	4	0	40	24	30	0	0.624061	0	6.20887	4.65267	4.13126	0.20802	4.9976	29.0601	1.34738	4.4308	4.9654e-09	1.2002e-07	UP	--	--	--	--	--	--	no KO assigned | (RefSeq) hypothetical protein	http://www.genome.jp/dbget-bin/www_bget?pper:PRUPE_ppa025024mg	PREDICTED: non-specific lipid-transfer protein 2-like
Pav_sc0002360.1_g920.1.mk	Pav_sc0002360.1	4	10	3	117	87	209	0.411574	0.989116	0.37423	11.5138	10.6928	18.2468	0.59164	13.4845	123.643	5.88031	4.3941	2.8965e-13	1.1849e-11	UP	--	--	--	--	--	--	K09422 myb proto-oncogene protein, plant | (RefSeq) hypothetical protein	http://www.genome.jp/dbget-bin/www_bget?pper:PRUPE_ppa026553mg	PREDICTED: myb-related protein Myb4-like
Pav_sc0000622.1_g050.1.br	Pav_sc0000622.1	37	43	50	1015	891	1158	1.2135	1.35571	1.9881	31.8383	34.906	32.2255	1.5191	32.9899	950.345	46.3004	4.3594	8.7868e-87	1.1502e-83	UP	GO:1902578//GO:0055085//GO:0009987//GO:0051179//GO:0044763//GO:0008150//GO:0006810//GO:0051234//GO:0044699//GO:0044765	single-organism localization//transmembrane transport//cellular process//localization//single-organism cellular process//biological_process//transport//establishment of localization//single-organism process//single-organism transport	GO:0016020//GO:0016021//GO:0005575//GO:0044425//GO:0031224	membrane//integral component of membrane//cellular_component//membrane part//intrinsic component of membrane	GO:0043492//GO:0016887//GO:0032550//GO:0032549//GO:1901363//GO:0042623//GO:0097159//GO:0017076//GO:0016820//GO:0032555//GO:0005215//GO:0016817//GO:0015405//GO:0001883//GO:1901265//GO:0043167//GO:0017111//GO:0042626//GO:0032561//GO:0030554//GO:0003674//GO:0035639//GO:0022804//GO:0097367//GO:0032559//GO:0005488//GO:0015399//GO:0016787//GO:0022857//GO:0036094//GO:0003677//GO:0005525//GO:0032553//GO:…	ATPase activity, coupled to movement of substances//ATPase activity//purine ribonucleoside binding//ribonucleoside binding//heterocyclic compound binding//ATPase activity, coupled//organic cyclic compound binding//purine nucleotide binding//hydrolase activity, acting on acid anhydrides, catalyzing transmembrane movement of substances//purine ribonucleotide binding//transporter activity//hydrolase…	K05666 ATP-binding cassette, subfamily C (CFTR/MRP), member 2 | (RefSeq) hypothetical protein	http://www.genome.jp/dbget-bin/www_bget?pper:PRUPE_ppa000355mg	PREDICTED: ABC transporter C family member 3-like isoform X2
Pav_sc0000780.1_g430.1.mk	Pav_sc0000780.1	4	0	0	43	26	23	0.105479	0	0	1.08447	0.818959	0.514619	0.0351595	0.806017	28.8561	1.35482	4.4127	3.7838e-08	7.9552e-07	UP	GO:0050789//GO:0016070//GO:0097659//GO:0006351//GO:0080090//GO:1901360//GO:0032774//GO:0071704//GO:0060255//GO:0010556//GO:0009059//GO:0009058//GO:1901362//GO:0019438//GO:0018130//GO:0043170//GO:0006725//GO:0019222//GO:2000112//GO:0009889//GO:0006355//GO:0009987//GO:0044237//GO:0019219//GO:2001141//GO:0090304//GO:0034641//GO:0006807//GO:0010467//GO:0010468//GO:1901576//GO:0044249//GO:0031323//GO:…	regulation of biological process//RNA metabolic process//nucleic acid-templated transcription//transcription, DNA-templated//regulation of primary metabolic process//organic cyclic compound metabolic process//RNA biosynthetic process//organic substance metabolic process//regulation of macromolecule metabolic process//regulation of macromolecule biosynthetic process//macromolecule biosynthetic pro…	--	--	GO:0097159//GO:1901363//GO:0003677//GO:0003676//GO:0003674//GO:0005488	organic cyclic compound binding//heterocyclic compound binding//DNA binding//nucleic acid binding//molecular_function//binding	no KO assigned | (RefSeq) hypothetical protein	http://www.genome.jp/dbget-bin/www_bget?pper:PRUPE_ppa007513mg	PREDICTED: dof zinc finger protein DOF2.4-like
Pav_sc0000195.1_g130.1.mk	Pav_sc0000195.1	9	1	5	163	89	98	0.354506	0.0378652	0.238771	6.14065	4.1875	3.27537	0.210381	4.53451	108.619	5.31359	4.3534	6.4822e-12	2.2901e-10	UP	GO:0046474//GO:1901564//GO:0006629//GO:0006644//GO:0006793//GO:0044237//GO:0045017//GO:0009987//GO:0006807//GO:0006658//GO:0006650//GO:0071704//GO:0044710//GO:0044763//GO:0044281//GO:0046486//GO:0006659//GO:0009058//GO:1901566//GO:0008150//GO:1901605//GO:0006082//GO:0008654//GO:0008152//GO:0044255//GO:0044711//GO:1901135//GO:0019752//GO:0006575//GO:0044699//GO:0006520//GO:0044249//GO:1901576//GO:…	glycerophospholipid biosynthetic process//organonitrogen compound metabolic process//lipid metabolic process//phospholipid metabolic process//phosphorus metabolic process//cellular metabolic process//glycerolipid biosynthetic process//cellular process//nitrogen compound metabolic process//phosphatidylserine metabolic process//glycerophospholipid metabolic process//organic substance metabolic proc…	--	--	--	--	no KO assigned | (RefSeq) hypothetical protein	http://www.genome.jp/dbget-bin/www_bget?pper:PRUPE_ppa004920mg	PREDICTED: amino acid permease 3-like
Pav_sc0000667.1_g150.1.mk	Pav_sc0000667.1	10	0	1	108	87	46	0.194035	0	0.0235239	2.00424	2.01643	0.75734	0.0725196	1.59267	77.6139	3.77274	4.3626	2.5594e-06	3.7249e-05	UP	GO:0008152//GO:0008150//GO:0044238//GO:0019538//GO:0043170//GO:0071704	metabolic process//biological_process//primary metabolic process//protein metabolic process//macromolecule metabolic process//organic substance metabolic process	--	--	--	--	no KO assigned | (RefSeq) hypothetical protein	http://www.genome.jp/dbget-bin/www_bget?pper:PRUPE_ppa001252mg	hypothetical protein PRUPE_ppa001252mg
Pav_sc0000977.1_g630.1.br	Pav_sc0000977.1	1	2	2	51	37	26	0.0380258	0.0731085	0.0922017	1.85479	1.6806	0.838891	0.0677787	1.45809	36.2327	1.78375	4.3443	5.2773e-08	1.0785e-06	UP	GO:0019538//GO:0043170//GO:0044237//GO:0009987//GO:0006793//GO:0036211//GO:0071704//GO:0008150//GO:0008152//GO:0006464//GO:0044260//GO:0044267//GO:0006468//GO:0016310//GO:0043412//GO:0044238//GO:0006796	protein metabolic process//macromolecule metabolic process//cellular metabolic process//cellular process//phosphorus metabolic process//protein modification process//organic substance metabolic process//biological_process//metabolic process//cellular protein modification process//cellular macromolecule metabolic process//cellular protein metabolic process//protein phosphorylation//phosphorylation…	--	--	GO:0016772//GO:0032549//GO:1901363//GO:0032550//GO:0032555//GO:0097159//GO:0017076//GO:1901265//GO:0001883//GO:0043167//GO:0003674//GO:0035639//GO:0030554//GO:0005488//GO:0016301//GO:0032559//GO:0097367//GO:0004672//GO:0003824//GO:0016773//GO:0016740//GO:0005524//GO:0000166//GO:0032553//GO:0043168//GO:0036094//GO:0001882	transferase activity, transferring phosphorus-containing groups//ribonucleoside binding//heterocyclic compound binding//purine ribonucleoside binding//purine ribonucleotide binding//organic cyclic compound binding//purine nucleotide binding//nucleoside phosphate binding//purine nucleoside binding//ion binding//molecular_function//purine ribonucleoside triphosphate binding//adenyl nucleotide bindi…	K04733 interleukin-1 receptor-associated kinase 4 [EC:2.7.11.1] | (RefSeq) hypothetical protein	http://www.genome.jp/dbget-bin/www_bget?pper:PRUPE_ppa015564mg	PREDICTED: probable LRR receptor-like serine/threonine-protein kinase At1g07650
Pav_sc0000378.1_g110.1.br	Pav_sc0000378.1	1	0	0	9	7	9	0.114077	0	0	0.981947	0.953855	0.871156	0.0380258	0.935652	7.74643	0.338706	4.5154	0.0037298	0.020162	UP	--	--	--	--	GO:0046983//GO:0003674//GO:0005488//GO:0005515	protein dimerization activity//molecular_function//binding//protein binding	no KO assigned | (RefSeq) hypothetical protein	http://www.genome.jp/dbget-bin/www_bget?pper:PRUPE_ppa021879mg	hypothetical protein PRUPE_ppa021879mg
Pav_sc0000855.1_g030.1.mk	Pav_sc0000855.1	4	4	4	94	41	156	0.207824	0.199782	0.251957	4.671	2.54451	6.87725	0.219854	4.69759	85.1587	4.24492	4.3263	8.4406e-07	1.3875e-05	UP	--	--	--	--	GO:0016887//GO:0032549//GO:1901363//GO:0032550//GO:0016817//GO:0032555//GO:0017076//GO:0097159//GO:0017111//GO:0043167//GO:1901265//GO:0001883//GO:0035639//GO:0003674//GO:0030554//GO:0005488//GO:0032559//GO:0097367//GO:0003824//GO:0000166//GO:0005524//GO:0032553//GO:0043168//GO:0016787//GO:0036094//GO:0001882//GO:0016462//GO:0016818	ATPase activity//ribonucleoside binding//heterocyclic compound binding//purine ribonucleoside binding//hydrolase activity, acting on acid anhydrides//purine ribonucleotide binding//purine nucleotide binding//organic cyclic compound binding//nucleoside-triphosphatase activity//ion binding//nucleoside phosphate binding//purine nucleoside binding//purine ribonucleoside triphosphate binding//molecula…	no KO assigned | (RefSeq) hypothetical protein	http://www.genome.jp/dbget-bin/www_bget?pper:PRUPE_ppa000906mg	PREDICTED: ABC transporter C family member 3-like
Pav_sc0001031.1_g250.1.mk	Pav_sc0001031.1	0	0	2	24	16	5	0	0	0.340817	3.2264	2.68637	0.596327	0.113606	2.1697	14.5889	0.771357	4.2413	0.0023268	0.013714	UP	--	--	--	--	--	--	no KO assigned | (RefSeq) hypothetical protein	http://www.genome.jp/dbget-bin/www_bget?pper:PRUPE_ppa012792mg	-\-
Pav_sc0000243.1_g170.1.mk	Pav_sc0000243.1	2	0	1	42	16	10	0.0812875	0	0.0492747	1.63263	0.77678	0.344864	0.0435208	0.918093	21.2907	1.06309	4.3239	0.0036332	0.01976	UP	--	--	--	--	GO:0003674//GO:0030170//GO:1901363//GO:0005488//GO:0016769//GO:0043168//GO:0097159//GO:0003824//GO:0016740//GO:0043167//GO:0008483//GO:0048037	molecular_function//pyridoxal phosphate binding//heterocyclic compound binding//binding//transferase activity, transferring nitrogenous groups//anion binding//organic cyclic compound binding//catalytic activity//transferase activity//ion binding//transaminase activity//cofactor binding	K00818 acetylornithine aminotransferase [EC:2.6.1.11] | (RefSeq) hypothetical protein	http://www.genome.jp/dbget-bin/www_bget?pper:PRUPE_ppa020493mg	PREDICTED: acetylornithine aminotransferase, mitochondrial-like isoform X2
Pav_sc0002106.1_g060.1.br	Pav_sc0002106.1	0	1	0	12	10	1	0	0.109663	0	1.30926	1.36265	0.0967951	0.0365543	0.922902	7.6576	0.336845	4.5067	0.020511	0.078651	FALSE	--	--	GO:0016020//GO:0005575	membrane//cellular_component	--	--	no KO assigned | (RefSeq) hypothetical protein	http://www.genome.jp/dbget-bin/www_bget?pper:PRUPE_ppa013789mg	-\-
Pav_sc0000213.1_g010.1.mk	Pav_sc0000213.1	1	3	11	164	2	230	0.0799121	0.230459	1.0657	12.5344	0.190909	15.5953	0.458691	9.44019	110.869	5.5917	4.3094	0.0081454	0.037932	UP	--	--	--	--	--	--	no KO assigned | (RefSeq) hypothetical protein	http://www.genome.jp/dbget-bin/www_bget?pper:PRUPE_ppa015761mg	PREDICTED: NAC domain-containing protein 2-like
Pav_sc0002106.1_g030.1.br	Pav_sc0002106.1	5	0	1	63	48	18	0.387751	0	0.0940185	4.67271	4.4464	1.18443	0.16059	3.43451	41.8781	2.07921	4.3321	0.00022242	0.0019255	UP	GO:0044710//GO:0008152//GO:0055114//GO:0008150//GO:0044699	single-organism metabolic process//metabolic process//oxidation-reduction process//biological_process//single-organism process	--	--	GO:0008121//GO:0022891//GO:0016679//GO:0022890//GO:0015077//GO:0005215//GO:0016491//GO:0008324//GO:0015078//GO:0015075//GO:0003674//GO:0016681//GO:0022892//GO:0003824//GO:0022857	ubiquinol-cytochrome-c reductase activity//substrate-specific transmembrane transporter activity//oxidoreductase activity, acting on diphenols and related substances as donors//inorganic cation transmembrane transporter activity//monovalent inorganic cation transmembrane transporter activity//transporter activity//oxidoreductase activity//cation transmembrane transporter activity//hydrogen ion tr…	no KO assigned | (RefSeq) hypothetical protein	http://www.genome.jp/dbget-bin/www_bget?pper:PRUPE_ppa011816mg	hypothetical protein PRUPE_ppa011816mg
Pav_sc0000506.1_g060.1.br	Pav_sc0000506.1	2	1	5	68	45	70	0.0661457	0.031793	0.200481	2.15093	1.77774	1.96437	0.0994731	1.96435	56.0546	2.94265	4.2516	1.5623e-15	7.9463e-14	UP	GO:0008150//GO:0043170//GO:0019538//GO:0006468//GO:0044267//GO:0044260//GO:0006464//GO:0006793//GO:0009987//GO:0008152//GO:0044237//GO:0043412//GO:0071704//GO:0016310//GO:0036211//GO:0006796//GO:0044238	biological_process//macromolecule metabolic process//protein metabolic process//protein phosphorylation//cellular protein metabolic process//cellular macromolecule metabolic process//cellular protein modification process//phosphorus metabolic process//cellular process//metabolic process//cellular metabolic process//macromolecule modification//organic substance metabolic process//phosphorylation//…	--	--	GO:0030554//GO:0016772//GO:0035639//GO:0003674//GO:0032559//GO:0032550//GO:0097367//GO:0016301//GO:0005488//GO:1901363//GO:0032549//GO:0017076//GO:0097159//GO:0036094//GO:0043168//GO:0032555//GO:0032553//GO:0000166//GO:0005524//GO:0016740//GO:0016773//GO:0003824//GO:0004672//GO:0001882//GO:0043167//GO:1901265//GO:0001883	adenyl nucleotide binding//transferase activity, transferring phosphorus-containing groups//purine ribonucleoside triphosphate binding//molecular_function//adenyl ribonucleotide binding//purine ribonucleoside binding//carbohydrate derivative binding//kinase activity//binding//heterocyclic compound binding//ribonucleoside binding//purine nucleotide binding//organic cyclic compound binding//small m…	no KO assigned | (RefSeq) hypothetical protein	http://www.genome.jp/dbget-bin/www_bget?pper:PRUPE_ppa026371mg	PREDICTED: probable LRR receptor-like serine/threonine-protein kinase At1g07650
Pav_sc0007753.1_g010.1.br	Pav_sc0007753.1	0	1	1	15	10	21	0	0.173948	0.219376	2.59595	2.16144	3.22428	0.131108	2.66056	13.8711	0.722524	4.2629	6.0137e-05	0.00061654	UP	GO:0055114//GO:0008152//GO:0008150//GO:0044710//GO:0044699	oxidation-reduction process//metabolic process//biological_process//single-organism metabolic process//single-organism process	--	--	GO:0003674//GO:0003824//GO:0016491	molecular_function//catalytic activity//oxidoreductase activity	K00383 glutathione reductase (NADPH) [EC:1.8.1.7] | (RefSeq) hypothetical protein	http://www.genome.jp/dbget-bin/www_bget?pper:PRUPE_ppa004673mg	PREDICTED: glutathione reductase, cytosolic
Pav_sc0001794.1_g660.1.mk	Pav_sc0001794.1	0	3	0	31	1	40	0	0.290408	0	2.98562	0.120285	3.41776	0.0968026	2.17455	20.2696	1.01054	4.3261	0.01137	0.049309	UP	--	--	--	--	--	--	K00761 uracil phosphoribosyltransferase [EC:2.4.2.9] | (RefSeq) hypothetical protein	http://www.genome.jp/dbget-bin/www_bget?pper:PRUPE_ppa009527mg	PREDICTED: uracil phosphoribosyltransferase
Pav_sc0000890.1_g1200.1.mk	Pav_sc0000890.1	27	25	7	407	389	499	0.764025	0.680054	0.240144	11.015	13.1485	11.9811	0.561408	12.0482	402.377	20.2659	4.3114	3.0028e-59	1.4092e-56	UP	GO:0044699//GO:0008150//GO:0008152//GO:0055114//GO:0044710	single-organism process//biological_process//metabolic process//oxidation-reduction process//single-organism metabolic process	--	--	GO:0003824//GO:0020037//GO:0003674//GO:0005488//GO:0016491//GO:0046914//GO:0046872//GO:0097159//GO:0046906//GO:0016705//GO:0005506//GO:0043167//GO:1901363//GO:0043169	catalytic activity//heme binding//molecular_function//binding//oxidoreductase activity//transition metal ion binding//metal ion binding//organic cyclic compound binding//tetrapyrrole binding//oxidoreductase activity, acting on paired donors, with incorporation or reduction of molecular oxygen//iron ion binding//ion binding//heterocyclic compound binding//cation binding	no KO assigned | (RefSeq) hypothetical protein	http://www.genome.jp/dbget-bin/www_bget?pper:PRUPE_ppa004175mg	PREDICTED: cytochrome P450 82A3-like
Pav_sc0000817.1_g120.1.mk	Pav_sc0000817.1	2	0	0	23	9	12	0.0386324	0	0	0.424908	0.207658	0.196678	0.0128775	0.276415	13.4846	0.677412	4.3151	9.3249e-05	0.00090774	UP	--	--	--	--	GO:0003674//GO:0005543//GO:0005488//GO:0043169//GO:0008289//GO:0046872//GO:0043168//GO:0005544//GO:0043167//GO:0005509	molecular_function//phospholipid binding//binding//cation binding//lipid binding//metal ion binding//anion binding//calcium-dependent phospholipid binding//ion binding//calcium ion binding	K17099 annexin A13 | (RefSeq) hypothetical protein	http://www.genome.jp/dbget-bin/www_bget?pper:PRUPE_ppa021580mg	PREDICTED: annexin A13-like
Pav_sc0000095.1_g290.1.br	Pav_sc0000095.1	3	1	4	58	58	57	0.0596314	0.0191079	0.0963927	1.10262	1.3771	0.961352	0.0583773	1.14703	54.5664	2.89568	4.236	8.4967e-15	4.0797e-13	UP	GO:0044706//GO:0008037//GO:0022414//GO:0048544//GO:0044763//GO:0009856//GO:0071704//GO:0036211//GO:0044237//GO:0009987//GO:0007154//GO:0006793//GO:0043170//GO:0019538//GO:0044703//GO:0032501//GO:0006796//GO:0044238//GO:0043412//GO:0016310//GO:0044699//GO:0006464//GO:0051704//GO:0006468//GO:0044260//GO:0044267//GO:0008152//GO:0008150//GO:0009875	multi-multicellular organism process//cell recognition//reproductive process//recognition of pollen//single-organism cellular process//pollination//organic substance metabolic process//protein modification process//cellular metabolic process//cellular process//cell communication//phosphorus metabolic process//macromolecule metabolic process//protein metabolic process//multi-organism reproductive …	--	--	GO:1901265//GO:0001883//GO:0043167//GO:0004674//GO:0032555//GO:0097159//GO:0017076//GO:0032550//GO:1901363//GO:0032549//GO:0016772//GO:0001882//GO:0043168//GO:0032553//GO:0036094//GO:0003824//GO:0016773//GO:0004672//GO:0005524//GO:0000166//GO:0016740//GO:0016301//GO:0032559//GO:0097367//GO:0005488//GO:0003674//GO:0035639//GO:0030554	nucleoside phosphate binding//purine nucleoside binding//ion binding//protein serine/threonine kinase activity//purine ribonucleotide binding//organic cyclic compound binding//purine nucleotide binding//purine ribonucleoside binding//heterocyclic compound binding//ribonucleoside binding//transferase activity, transferring phosphorus-containing groups//nucleoside binding//anion binding//ribonucleo…	no KO assigned | (RefSeq) hypothetical protein	http://www.genome.jp/dbget-bin/www_bget?pper:PRUPE_ppa021546mg	PREDICTED: G-type lectin S-receptor-like serine/threonine-protein kinase At4g27290, partial
Pav_sc0000544.1_g070.1.mk	Pav_sc0000544.1	19	7	0	227	173	133	1.23091	0.435944	0	14.0651	13.3876	7.31102	0.555618	11.5879	169.032	8.79333	4.2647	2.7665e-11	9.0657e-10	UP	GO:0050794//GO:0044700//GO:0043412//GO:0044699//GO:0044238//GO:0023052//GO:0008150//GO:0051716//GO:0006464//GO:0050896//GO:0055114//GO:0044267//GO:0044260//GO:0065007//GO:0008152//GO:0035556//GO:0071704//GO:0044710//GO:0036211//GO:0007165//GO:0050789//GO:0044763//GO:0019538//GO:0043170//GO:0009987//GO:0044237//GO:0007154	regulation of cellular process//single organism signaling//macromolecule modification//single-organism process//primary metabolic process//signaling//biological_process//cellular response to stimulus//cellular protein modification process//response to stimulus//oxidation-reduction process//cellular protein metabolic process//cellular macromolecule metabolic process//biological regulation//metabol…	--	--	GO:0016668//GO:0016667//GO:0003824//GO:0016151//GO:0003674//GO:0047134//GO:0005488//GO:0008270//GO:0016651//GO:0046872//GO:0046914//GO:0016491//GO:0043167//GO:0043169	oxidoreductase activity, acting on a sulfur group of donors, NAD(P) as acceptor//oxidoreductase activity, acting on a sulfur group of donors//catalytic activity//nickel cation binding//molecular_function//protein-disulfide reductase activity//binding//zinc ion binding//oxidoreductase activity, acting on NAD(P)H//metal ion binding//transition metal ion binding//oxidoreductase activity//ion binding…	no KO assigned | (RefSeq) hypothetical protein	http://www.genome.jp/dbget-bin/www_bget?pper:PRUPE_ppa010933mg	PREDICTED: uncharacterized protein LOC103335502
Pav_sc0000396.1_g920.1.mk	Pav_sc0000396.1	3	0	0	18	31	11	0.363293	0	0	2.08475	4.48416	1.13027	0.121098	2.56639	20.1088	1.01612	4.3067	0.0040875	0.021733	UP	GO:0044699//GO:0042157//GO:0071704//GO:0051234//GO:0044238//GO:0051179//GO:0044765//GO:0006810//GO:1902578//GO:0033036//GO:0019538//GO:0006869//GO:0043170//GO:0008150//GO:0010876//GO:0008152//GO:0071702	single-organism process//lipoprotein metabolic process//organic substance metabolic process//establishment of localization//primary metabolic process//localization//single-organism transport//transport//single-organism localization//macromolecule localization//protein metabolic process//lipid transport//macromolecule metabolic process//biological_process//lipid localization//metabolic process//or…	GO:0005575//GO:0005576	cellular_component//extracellular region	GO:0008289//GO:0003674//GO:0005488	lipid binding//molecular_function//binding	no KO assigned | (RefSeq) hypothetical protein	http://www.genome.jp/dbget-bin/www_bget?pper:PRUPE_ppb021269mg	hypothetical protein PRUPE_ppb021269mg, partial
Pav_sc0001742.1_g030.1.br	Pav_sc0001742.1	8	2	9	150	99	171	0.188818	0.0453777	0.257529	3.38602	2.79108	3.42454	0.163908	3.20055	127.96	6.85444	4.2225	2.9357e-29	3.9256e-27	UP	GO:0044699//GO:0051234//GO:0044763//GO:0044765//GO:0051179//GO:1902578//GO:0006810//GO:0008150//GO:0009987//GO:0055085	single-organism process//establishment of localization//single-organism cellular process//single-organism transport//localization//single-organism localization//transport//biological_process//cellular process//transmembrane transport	GO:0019012//GO:0044425//GO:0044423//GO:0019031//GO:0031224//GO:0019028//GO:0036338//GO:0016020//GO:0005575//GO:0016021	virion//membrane part//virion part//viral envelope//intrinsic component of membrane//viral capsid//viral membrane//membrane//cellular_component//integral component of membrane	GO:0005524//GO:0000166//GO:0005215//GO:0016817//GO:0003824//GO:0015405//GO:0022857//GO:0036094//GO:0097159//GO:0005525//GO:0017076//GO:0042623//GO:0016787//GO:0032555//GO:0043168//GO:0005198//GO:0032553//GO:0016820//GO:0042626//GO:0017111//GO:0019001//GO:0016818//GO:0016462//GO:0001882//GO:0001883//GO:1901265//GO:0043167//GO:0030554//GO:0016887//GO:0003674//GO:0035639//GO:0022804//GO:0032561//GO:…	ATP binding//nucleotide binding//transporter activity//hydrolase activity, acting on acid anhydrides//catalytic activity//P-P-bond-hydrolysis-driven transmembrane transporter activity//transmembrane transporter activity//small molecule binding//organic cyclic compound binding//GTP binding//purine nucleotide binding//ATPase activity, coupled//hydrolase activity//purine ribonucleotide binding//anio…	K05666 ATP-binding cassette, subfamily C (CFTR/MRP), member 2 | (RefSeq) hypothetical protein	http://www.genome.jp/dbget-bin/www_bget?pper:PRUPE_ppa000355mg	PREDICTED: ABC transporter C family member 3-like
Pav_sc0000373.1_g1010.1.mk	Pav_sc0000373.1	0	0	1	11	9	2	0	0	0.0437747	0.379866	0.388168	0.061274	0.0145916	0.276436	7.24403	0.385678	4.2313	0.0092415	0.041898	UP	GO:0060255//GO:1903506//GO:0046483//GO:0010556//GO:0009059//GO:0044238//GO:0051252//GO:0044271//GO:0031326//GO:0006139//GO:0009058//GO:0032501//GO:0016070//GO:0097659//GO:0050789//GO:0010468//GO:0010467//GO:0006351//GO:0044699//GO:0044767//GO:1901360//GO:0080090//GO:0031323//GO:0044249//GO:1901576//GO:0032774//GO:0050794//GO:0071704//GO:0006355//GO:0007275//GO:0009889//GO:0051171//GO:0044237//GO:…	regulation of macromolecule metabolic process//regulation of nucleic acid-templated transcription//heterocycle metabolic process//regulation of macromolecule biosynthetic process//macromolecule biosynthetic process//primary metabolic process//regulation of RNA metabolic process//cellular nitrogen compound biosynthetic process//regulation of cellular biosynthetic process//nucleobase-containing com…	GO:0031224//GO:0044425//GO:0005575//GO:0016021//GO:0016020	intrinsic component of membrane//membrane part//cellular_component//integral component of membrane//membrane	GO:0016741//GO:0003676//GO:0016740//GO:0016491//GO:0003824//GO:0008171//GO:0097159//GO:0003677//GO:0009055//GO:0005488//GO:0008168//GO:0005515//GO:1901363//GO:0003674//GO:0046983	transferase activity, transferring one-carbon groups//nucleic acid binding//transferase activity//oxidoreductase activity//catalytic activity//O-methyltransferase activity//organic cyclic compound binding//DNA binding//electron carrier activity//binding//methyltransferase activity//protein binding//heterocyclic compound binding//molecular_function//protein dimerization activity	no KO assigned | (RefSeq) hypothetical protein	http://www.genome.jp/dbget-bin/www_bget?pper:PRUPE_ppa025618mg	PREDICTED: (RS)-norcoclaurine 6-O-methyltransferase-like
Pav_sc0001196.1_g250.1.mk	Pav_sc0001196.1	0	0	2	18	18	5	0	0	0.094406	0.670282	0.837136	0.165182	0.0314687	0.557533	13.5601	0.771357	4.1358	0.0028161	0.016039	UP	--	--	--	--	--	--	no KO assigned | (RefSeq) hypothetical protein	http://www.genome.jp/dbget-bin/www_bget?pper:PRUPE_ppa008717mg	conserved hypothetical protein
Pav_sc0001323.1_g060.1.mk	Pav_sc0001323.1	0	1	0	10	5	8	0	0.0308217	0	0.30665	0.191492	0.217641	0.0102739	0.238595	7.01695	0.336845	4.3807	0.0065862	0.032013	UP	GO:0030001//GO:0071704//GO:0044763//GO:0051179//GO:1902578//GO:0006812//GO:0019538//GO:0043170//GO:0010876//GO:0009987//GO:0071702//GO:0055085//GO:0044699//GO:0042157//GO:0051234//GO:0044238//GO:0044765//GO:0006810//GO:0033036//GO:0006869//GO:0008150//GO:0008152//GO:0006811	metal ion transport//organic substance metabolic process//single-organism cellular process//localization//single-organism localization//cation transport//protein metabolic process//macromolecule metabolic process//lipid localization//cellular process//organic substance transport//transmembrane transport//single-organism process//lipoprotein metabolic process//establishment of localization//primar…	GO:0016020//GO:0005575//GO:0005576	membrane//cellular_component//extracellular region	GO:0005215//GO:0022890//GO:0022891//GO:0008289//GO:0022857//GO:0015075//GO:0003674//GO:0008324//GO:0022892//GO:0005488//GO:0046873	transporter activity//inorganic cation transmembrane transporter activity//substrate-specific transmembrane transporter activity//lipid binding//transmembrane transporter activity//ion transmembrane transporter activity//molecular_function//cation transmembrane transporter activity//substrate-specific transporter activity//binding//metal ion transmembrane transporter activity	no KO assigned | (RefSeq) hypothetical protein	http://www.genome.jp/dbget-bin/www_bget?pper:PRUPE_ppa022136mg	PREDICTED: uncharacterized protein LOC103319269
Pav_sc0000488.1_g450.1.mk	Pav_sc0000488.1	5	2	1	89	41	36	0.136893	0.0526382	0.0331926	2.33049	1.34085	0.83631	0.0742412	1.50255	51.7574	2.7529	4.2327	2.2471e-05	0.00025947	UP	--	--	--	--	--	--	K19307 25S rRNA (uracil2634-N3)-methyltransferase [EC:2.1.1.313] | (RefSeq) hypothetical protein	http://www.genome.jp/dbget-bin/www_bget?pper:PRUPE_ppa022627mg	PREDICTED: uncharacterized protein At4g26485-like
Pav_sc0000544.1_g290.1.mk	Pav_sc0000544.1	0	1	0	13	6	3	0	0.00642428	0	0.083091	0.0478962	0.0170114	0.00214143	0.0493329	6.96381	0.336845	4.3697	0.0080776	0.037679	UP	GO:0006351//GO:0097659//GO:0016070//GO:0050789//GO:0071704//GO:0032774//GO:1901360//GO:0080090//GO:0009059//GO:0010556//GO:0060255//GO:0009058//GO:2000112//GO:0019222//GO:0006725//GO:0043170//GO:0018130//GO:1901362//GO:0019438//GO:0019219//GO:0009987//GO:0044237//GO:0006355//GO:0009889//GO:0006807//GO:0034641//GO:0090304//GO:2001141//GO:0010467//GO:0010468//GO:0050794//GO:0031323//GO:0044249//GO:…	transcription, DNA-templated//nucleic acid-templated transcription//RNA metabolic process//regulation of biological process//organic substance metabolic process//RNA biosynthetic process//organic cyclic compound metabolic process//regulation of primary metabolic process//macromolecule biosynthetic process//regulation of macromolecule biosynthetic process//regulation of macromolecule metabolic pro…	--	--	GO:0016817//GO:0032555//GO:0097159//GO:0016798//GO:0017076//GO:0017111//GO:0043167//GO:0001883//GO:1901265//GO:0016887//GO:0008134//GO:0032549//GO:1901363//GO:0004553//GO:0032550//GO:0033926//GO:0003824//GO:0000166//GO:0005524//GO:0032553//GO:0043168//GO:0016787//GO:0036094//GO:0005525//GO:0003676//GO:0001882//GO:0003924//GO:0016462//GO:0019001//GO:0016818//GO:0003674//GO:0035639//GO:0030554//GO:…	hydrolase activity, acting on acid anhydrides//purine ribonucleotide binding//organic cyclic compound binding//hydrolase activity, acting on glycosyl bonds//purine nucleotide binding//nucleoside-triphosphatase activity//ion binding//purine nucleoside binding//nucleoside phosphate binding//ATPase activity//transcription factor binding//ribonucleoside binding//heterocyclic compound binding//hydrola…	no KO assigned | (RefSeq) hypothetical protein	http://www.genome.jp/dbget-bin/www_bget?pper:PRUPE_ppa022932mg	hypothetical protein PRUPE_ppa022932mg, partial
Pav_sc0000244.1_g070.1.mk	Pav_sc0000244.1	1	5	3	62	28	107	0.034574	0.16618	0.125748	2.05016	1.15636	3.13897	0.108834	2.11516	57.6252	3.17997	4.1796	3.3291e-06	4.7034e-05	UP	GO:0008152//GO:0051171//GO:0065007//GO:0044260//GO:0034645//GO:0034654//GO:0008150//GO:0044238//GO:0046483//GO:1903506//GO:0006139//GO:0031326//GO:0044271//GO:0051252//GO:0010467//GO:0010468//GO:0050794//GO:0031323//GO:0044249//GO:1901576//GO:0019219//GO:0009987//GO:0044237//GO:0009889//GO:0006355//GO:0034641//GO:0006807//GO:0090304//GO:2001141//GO:0043170//GO:2000112//GO:0019222//GO:0006725//GO:…	metabolic process//regulation of nitrogen compound metabolic process//biological regulation//cellular macromolecule metabolic process//cellular macromolecule biosynthetic process//nucleobase-containing compound biosynthetic process//biological_process//primary metabolic process//heterocycle metabolic process//regulation of nucleic acid-templated transcription//nucleobase-containing compound metab…	--	--	GO:0005488//GO:0003674//GO:0003676//GO:0003677//GO:1901363//GO:0097159	binding//molecular_function//nucleic acid binding//DNA binding//heterocyclic compound binding//organic cyclic compound binding	no KO assigned | (RefSeq) hypothetical protein	http://www.genome.jp/dbget-bin/www_bget?pper:PRUPE_ppa009455mg	PREDICTED: NAC transcription factor 29
Pav_sc0000129.1_g780.1.mk	Pav_sc0000129.1	1	0	0	18	1	4	0.092604	0	0	1.59422	0.110615	0.314299	0.030868	0.673045	6.81694	0.338706	4.331	0.12785	0.31271	FALSE	--	--	--	--	--	--	--	--	PREDICTED: anthocyanin regulatory C1 protein-like
Pav_sc0000829.1_g140.1.mk	Pav_sc0000829.1	0	1	0	7	4	12	0	0.0457204	0	0.318416	0.227245	0.484268	0.0152401	0.34331	6.80419	0.336845	4.3363	0.0071319	0.034058	UP	--	--	--	--	--	--	no KO assigned | (RefSeq) hypothetical protein	http://www.genome.jp/dbget-bin/www_bget?pper:PRUPE_ppa025472mg	PREDICTED: TMV resistance protein N-like
Pav_co4014565.1_g010.1.mk	Pav_co4014565.1	2	0	4	50	33	41	0.212739	0	0.515831	5.08666	4.19291	3.70045	0.242857	4.32667	38.3988	2.22012	4.1123	5.0378e-11	1.6064e-09	UP	GO:0016043//GO:0044085//GO:0006461//GO:0065003//GO:0009987//GO:0043933//GO:0022607//GO:0071822//GO:0070271//GO:0071840//GO:0008150	cellular component organization//cellular component biogenesis//protein complex assembly//macromolecular complex assembly//cellular process//macromolecular complex subunit organization//cellular component assembly//protein complex subunit organization//protein complex biogenesis//cellular component organization or biogenesis//biological_process	GO:0044424//GO:0005623//GO:0044444//GO:0005622//GO:0044464//GO:0043229//GO:0005575//GO:0043231//GO:0005737//GO:0043227//GO:0043226//GO:0005739	intracellular part//cell//cytoplasmic part//intracellular//cell part//intracellular organelle//cellular_component//intracellular membrane-bounded organelle//cytoplasm//membrane-bounded organelle//organelle//mitochondrion	--	--	K07555 ATP synthase mitochondrial F1 complex assembly factor 1 | (RefSeq) hypothetical protein	http://www.genome.jp/dbget-bin/www_bget?pper:PRUPE_ppa010484mg	hypothetical protein PRUPE_ppa010484mg
Pav_sc0000713.1_g260.1.mk	Pav_sc0000713.1	37	4	0	436	226	122	1.03276	0.10733	0	11.6394	7.53516	2.88944	0.380032	7.35468	248.679	13.8795	4.1633	0.00024176	0.0020656	UP	--	--	--	--	--	--	no KO assigned | (RefSeq) hypothetical protein	http://www.genome.jp/dbget-bin/www_bget?pper:PRUPE_ppa002898mg	PREDICTED: protein FAF-like, chloroplastic
Pav_sc0000599.1_g120.1.mk	Pav_sc0000599.1	1	5	1	56	45	36	0.0125941	0.0605339	0.0152686	0.674532	0.676964	0.384703	0.0294655	0.578733	43.4322	2.40861	4.1725	5.6996e-11	1.8013e-09	UP	GO:0008150//GO:0034654//GO:0006810//GO:0034645//GO:0048519//GO:0016265//GO:0044260//GO:0065007//GO:0006811//GO:0051171//GO:0008152//GO:0051234//GO:0043066//GO:0050794//GO:0044249//GO:1901576//GO:0031323//GO:0044699//GO:0010468//GO:0010467//GO:0044765//GO:0044271//GO:0051252//GO:0031326//GO:0006139//GO:1903506//GO:0046483//GO:0044238//GO:0042981//GO:0006725//GO:0019222//GO:2000112//GO:0043170//GO:…	biological_process//nucleobase-containing compound biosynthetic process//transport//cellular macromolecule biosynthetic process//negative regulation of biological process//death//cellular macromolecule metabolic process//biological regulation//ion transport//regulation of nitrogen compound metabolic process//metabolic process//establishment of localization//negative regulation of apoptotic proces…	--	--	GO:0003674//GO:0005515//GO:0005488//GO:0005521//GO:0036094//GO:0000166//GO:0043169//GO:1901363//GO:0046872//GO:0097159//GO:1901265//GO:0043167	molecular_function//protein binding//binding//lamin binding//small molecule binding//nucleotide binding//cation binding//heterocyclic compound binding//metal ion binding//organic cyclic compound binding//nucleoside phosphate binding//ion binding	K17686 Cu+-exporting ATPase [EC:3.6.3.54] | (RefSeq) hypothetical protein	http://www.genome.jp/dbget-bin/www_bget?pper:PRUPE_ppa000896mg	PREDICTED: probable copper-transporting ATPase HMA5
Novel00072	Pav_sc0000054.1	5	1	0	54	38	24	0.222354	0.0427499	0	2.29676	2.01857	0.905609	0.0883681	1.74031	36.9773	2.03037	4.1868	2.6453e-06	3.8431e-05	UP	--	--	--	--	--	--	no KO assigned | (RefSeq) hypothetical protein	http://www.genome.jp/dbget-bin/www_bget?pper:PRUPE_ppa008539mg	--
Pav_sc0001084.1_g160.1.mk	Pav_sc0001084.1	0	0	1	8	2	13	0	0	0.06627	0.418237	0.130587	0.602953	0.02209	0.383926	6.60653	0.385678	4.0984	0.0075496	0.035705	UP	--	--	--	--	--	--	no KO assigned | (RefSeq) hypothetical protein	http://www.genome.jp/dbget-bin/www_bget?pper:PRUPE_ppa015325mg	PREDICTED: uncharacterized protein LOC103324482
Pav_sc0000500.1_g560.1.mk	Pav_sc0000500.1	11	6	7	170	123	191	0.462608	0.242567	0.356902	6.83778	6.17888	6.81565	0.354025	6.61077	148.392	8.44658	4.1349	1.7809e-31	2.6846e-29	UP	--	--	--	--	GO:0016746//GO:0016747//GO:0016740//GO:0003824//GO:0003674	transferase activity, transferring acyl groups//transferase activity, transferring acyl groups other than amino-acyl groups//transferase activity//catalytic activity//molecular_function	K19861 benzyl alcohol O-benzoyltransferase [EC:2.3.1.196 2.3.1.232] | (RefSeq) hypothetical protein	http://www.genome.jp/dbget-bin/www_bget?pper:PRUPE_ppa016489mg	PREDICTED: benzyl alcohol O-benzoyltransferase
Novel00920	Pav_sc0003874.1	3	0	3	38	37	45	0.220349	0	0.267141	2.66943	3.2462	2.8045	0.162497	2.90671	37.405	2.17315	4.1054	1.1712e-10	3.5482e-09	UP	--	--	--	--	--	--	--	--	--
Novel00560	Pav_sc0000979.1	0	2	2	37	21	22	0	0.131786	0.166204	2.42565	1.71943	1.27955	0.0993301	1.80821	24.8944	1.44505	4.1066	1.2757e-07	2.4165e-06	UP	--	--	--	--	--	--	--	--	--
Pav_sc0000069.1_g330.1.mk	Pav_sc0000069.1	1	4	0	20	22	60	0.0795085	0.305727	0	1.52086	2.0894	4.0478	0.128412	2.55268	30.3061	1.68609	4.1679	7.7307e-05	0.00076881	UP	--	--	--	--	--	--	no KO assigned | (RefSeq) hypothetical protein	http://www.genome.jp/dbget-bin/www_bget?pper:PRUPE_ppa015480mg	PREDICTED: probable WRKY transcription factor 50 isoform X2
Pav_sc0000044.1_g680.1.br	Pav_sc0000044.1	4	15	10	177	198	190	0.588512	2.12151	1.78371	24.9066	34.7972	23.7193	1.49791	27.8077	178.791	10.2643	4.1226	1.1404e-19	8.0809e-18	UP	GO:0042221//GO:0009725//GO:0009733//GO:0010033//GO:0008150//GO:0009719//GO:0050896	response to chemical//response to hormone//response to auxin//response to organic substance//biological_process//response to endogenous stimulus//response to stimulus	--	--	--	--	K14488 SAUR family protein | (RefSeq) hypothetical protein	http://www.genome.jp/dbget-bin/www_bget?pper:PRUPE_ppa013735mg	PREDICTED: auxin-induced protein 15A
Pav_sc0000980.1_g070.1.br	Pav_sc0000980.1	0	0	1	12	4	5	0	0	0.144589	1.36877	0.569835	0.505975	0.0481963	0.814861	6.43513	0.385678	4.0605	0.010779	0.047263	UP	--	--	--	--	--	--	--	--	-\-
Pav_sc0000977.1_g570.1.mk	Pav_sc0000977.1	5	2	8	82	84	126	1.15755	0.445102	2.24538	18.1564	23.2292	24.7511	1.28268	22.0455	89.9836	5.45265	4.0446	1.6957e-21	1.4394e-19	UP	--	--	--	--	--	--	K04733 interleukin-1 receptor-associated kinase 4 [EC:2.7.11.1] | (RefSeq) hypothetical protein	http://www.genome.jp/dbget-bin/www_bget?pper:PRUPE_ppa015564mg	PREDICTED: probable LRR receptor-like serine/threonine-protein kinase At1g07650
Pav_sc0001412.1_g360.1.br	Pav_sc0001412.1	1	0	0	4	8	8	0.0423191	0	0	0.161898	0.404399	0.287263	0.0141064	0.28452	6.36924	0.338706	4.233	0.013057	0.055006	FALSE	GO:0051234//GO:0006810//GO:0008150//GO:0051179	establishment of localization//transport//biological_process//localization	GO:0016020//GO:0005575	membrane//cellular_component	--	--	--	--	PREDICTED: ABC transporter C family member 3-like isoform X1
Pav_sc0000205.1_g340.1.mk	Pav_sc0000205.1	0	1	0	10	3	8	0	0.186833	0	1.85883	0.696465	1.31928	0.0622776	1.29153	6.25492	0.336845	4.2148	0.011718	0.050477	FALSE	--	--	--	--	--	--	K14569 ribosome biogenesis protein BMS1 | (RefSeq) hypothetical protein	http://www.genome.jp/dbget-bin/www_bget?pper:PRUPE_ppa000405mg	PREDICTED: ribosome biogenesis protein BMS1 homolog isoform X2
Pav_sc0005572.1_g010.1.br	Pav_sc0005572.1	2	1	1	29	21	25	0.105302	0.0506136	0.0638319	1.46033	1.32072	1.11687	0.0732493	1.29931	23.3044	1.39994	4.0572	4.2972e-07	7.4584e-06	UP	--	--	--	--	GO:0008168//GO:0003674//GO:0016741//GO:0016740//GO:0003824	methyltransferase activity//molecular_function//transferase activity, transferring one-carbon groups//transferase activity//catalytic activity	no KO assigned | (RefSeq) hypothetical protein	http://www.genome.jp/dbget-bin/www_bget?pper:PRUPE_ppa007492mg	PREDICTED: salicylate carboxymethyltransferase-like
Pav_sc0008367.1_g010.1.br	Pav_sc0008367.1	12	12	6	193	123	260	0.374826	0.360321	0.227211	5.76569	4.58921	6.89089	0.320786	5.7486	173.604	10.4207	4.0583	7.2215e-27	8.3154e-25	UP	GO:0016310//GO:0043412//GO:0044238//GO:0006796//GO:0008150//GO:0008152//GO:0006468//GO:0044260//GO:0044267//GO:0006464//GO:0036211//GO:0071704//GO:0043170//GO:0019538//GO:0006793//GO:0044237//GO:0009987	phosphorylation//macromolecule modification//primary metabolic process//phosphate-containing compound metabolic process//biological_process//metabolic process//protein phosphorylation//cellular macromolecule metabolic process//cellular protein metabolic process//cellular protein modification process//protein modification process//organic substance metabolic process//macromolecule metabolic proces…	GO:0031224//GO:0044425//GO:0016020//GO:0005575//GO:0016021	intrinsic component of membrane//membrane part//membrane//cellular_component//integral component of membrane	GO:0005524//GO:0000166//GO:0016740//GO:0003824//GO:0016773//GO:0022803//GO:0004672//GO:0022857//GO:0036094//GO:0043168//GO:0032553//GO:0005244//GO:0022832//GO:0022838//GO:0015267//GO:0001882//GO:0030554//GO:0015085//GO:0005262//GO:0008324//GO:0003674//GO:0015075//GO:0035639//GO:0022892//GO:0046873//GO:0005488//GO:0097367//GO:0032559//GO:0016301//GO:0005215//GO:0097159//GO:0017076//GO:0032555//GO:…	ATP binding//nucleotide binding//transferase activity//catalytic activity//phosphotransferase activity, alcohol group as acceptor//passive transmembrane transporter activity//protein kinase activity//transmembrane transporter activity//small molecule binding//anion binding//ribonucleotide binding//voltage-gated ion channel activity//voltage-gated channel activity//substrate-specific channel activ…	K04733 interleukin-1 receptor-associated kinase 4 [EC:2.7.11.1] | (RefSeq) hypothetical protein	http://www.genome.jp/dbget-bin/www_bget?pper:PRUPE_ppa025186mg	PREDICTED: probable receptor-like protein kinase At5g39020
Pav_sc0000351.1_g210.1.mk	Pav_sc0000351.1	11	2	2	145	67	65	0.690836	0.120746	0.15228	8.70955	5.02622	3.46377	0.321287	5.73318	86.0889	5.17081	4.0574	5.4785e-06	7.3876e-05	UP	--	--	--	--	--	--	no KO assigned | (RefSeq) hypothetical protein	http://www.genome.jp/dbget-bin/www_bget?pper:PRUPE_ppa008123mg	PREDICTED: OTU domain-containing protein At3g57810-like isoform X3
Pav_sc0002009.1_g170.1.mk	Pav_sc0002009.1	27	27	20	939	175	299	0.720428	0.692549	0.646975	23.9628	5.57762	6.76942	0.68665	12.1033	426.439	25.9534	4.0383	0.01028	0.045504	UP	GO:0034645//GO:0006304//GO:2000112//GO:0019222//GO:0006259//GO:0006725//GO:0043170//GO:0018130//GO:0008150//GO:1901362//GO:0019438//GO:0034654//GO:0006950//GO:0019219//GO:0008152//GO:0009987//GO:0051171//GO:0044237//GO:0006355//GO:0009889//GO:0006807//GO:0034641//GO:0065007//GO:0044260//GO:0050896//GO:0055114//GO:0090304//GO:2001141//GO:0006952//GO:0044699//GO:0006351//GO:0097659//GO:0016070//GO:…	cellular macromolecule biosynthetic process//DNA modification//regulation of cellular macromolecule biosynthetic process//regulation of metabolic process//DNA metabolic process//cellular aromatic compound metabolic process//macromolecule metabolic process//heterocycle biosynthetic process//biological_process//organic cyclic compound biosynthetic process//aromatic compound biosynthetic process//nu…	--	--	GO:0003674//GO:0016788//GO:0016679//GO:0004097//GO:0016893//GO:1901363//GO:0004536//GO:0005488//GO:0004520//GO:0004519//GO:0004518//GO:0003824//GO:0016491//GO:0016888//GO:0016787//GO:0097159//GO:0003677//GO:0003676//GO:0015666//GO:0016682//GO:0009036	molecular_function//hydrolase activity, acting on ester bonds//oxidoreductase activity, acting on diphenols and related substances as donors//catechol oxidase activity//endonuclease activity, active with either ribo- or deoxyribonucleic acids and producing 5'-phosphomonoesters//heterocyclic compound binding//deoxyribonuclease activity//binding//endodeoxyribonuclease activity//endonuclease activit…	K00422 polyphenol oxidase [EC:1.10.3.1] | (RefSeq) hypothetical protein	http://www.genome.jp/dbget-bin/www_bget?pper:PRUPE_ppa003257mg	PREDICTED: polyphenol oxidase, chloroplastic
Pav_sc0000731.1_g080.1.mk	Pav_sc0000731.1	3	0	0	35	9	12	0.254828	0	0	2.84341	0.913171	0.864889	0.0849426	1.54049	17.0662	1.01612	4.07	0.0073394	0.03489	UP	GO:0044765//GO:0044699//GO:0051234//GO:0006811//GO:0006810//GO:0008150//GO:0044763//GO:0051179//GO:0009987//GO:0055085//GO:1902578	single-organism transport//single-organism process//establishment of localization//ion transport//transport//biological_process//single-organism cellular process//localization//cellular process//transmembrane transport//single-organism localization	GO:0005575//GO:0016020	cellular_component//membrane	GO:0022838//GO:0015267//GO:0022803//GO:0022857//GO:0003674//GO:0015075//GO:0022892//GO:0005215//GO:0005216//GO:0022891	substrate-specific channel activity//channel activity//passive transmembrane transporter activity//transmembrane transporter activity//molecular_function//ion transmembrane transporter activity//substrate-specific transporter activity//transporter activity//ion channel activity//substrate-specific transmembrane transporter activity	K05391 cyclic nucleotide gated channel, other eukaryote | (RefSeq) hypothetical protein	http://www.genome.jp/dbget-bin/www_bget?pper:PRUPE_ppa003186mg	PREDICTED: cyclic nucleotide-gated ion channel 1-like isoform X3
Pav_sc0004421.1_g010.1.mk	Pav_sc0004421.1	17	4	5	151	103	242	0.615703	0.139265	0.219545	5.23052	4.45599	7.43689	0.324838	5.7078	148.662	9.03377	4.0406	3.1357e-15	1.5505e-13	UP	GO:0043170//GO:0019538//GO:0044237//GO:0009987//GO:0006793//GO:0036211//GO:0071704//GO:0008150//GO:0008152//GO:0006464//GO:0006468//GO:0044267//GO:0044260//GO:0016310//GO:0043412//GO:0044238//GO:0006796	macromolecule metabolic process//protein metabolic process//cellular metabolic process//cellular process//phosphorus metabolic process//protein modification process//organic substance metabolic process//biological_process//metabolic process//cellular protein modification process//protein phosphorylation//cellular protein metabolic process//cellular macromolecule metabolic process//phosphorylation…	--	--	GO:0016772//GO:1901363//GO:0032549//GO:0032550//GO:0032555//GO:0017076//GO:0097159//GO:1901265//GO:0001883//GO:0043167//GO:0035639//GO:0003674//GO:0030554//GO:0005515//GO:0005488//GO:0016301//GO:0032559//GO:0097367//GO:0003824//GO:0016773//GO:0004672//GO:0005524//GO:0000166//GO:0016740//GO:0043168//GO:0032553//GO:0036094//GO:0001882	transferase activity, transferring phosphorus-containing groups//heterocyclic compound binding//ribonucleoside binding//purine ribonucleoside binding//purine ribonucleotide binding//purine nucleotide binding//organic cyclic compound binding//nucleoside phosphate binding//purine nucleoside binding//ion binding//purine ribonucleoside triphosphate binding//molecular_function//adenyl nucleotide bindi…	no KO assigned | (RefSeq) hypothetical protein	http://www.genome.jp/dbget-bin/www_bget?pper:PRUPE_ppa004693mg	PREDICTED: serine/threonine-protein kinase TNNI3K
Novel00502	Pav_sc0000829.1	2	3	1	38	23	53	0.0444499	0.0640947	0.0269446	0.807738	0.610595	0.999472	0.0451631	0.805935	34.198	2.07363	4.0437	7.098e-10	1.9231e-08	UP	GO:0023052//GO:0008150//GO:0051716//GO:0050896//GO:0065007//GO:0044699//GO:0050794//GO:0044700//GO:0009987//GO:0007154//GO:0007165//GO:0050789//GO:0044763	signaling//biological_process//cellular response to stimulus//response to stimulus//biological regulation//single-organism process//regulation of cellular process//single organism signaling//cellular process//cell communication//signal transduction//regulation of biological process//single-organism cellular process	--	--	GO:0035639//GO:0003674//GO:0030554//GO:0005515//GO:0005488//GO:0097367//GO:0032559//GO:0000166//GO:0005524//GO:0043168//GO:0032553//GO:0036094//GO:0043531//GO:0001882//GO:1901363//GO:0032549//GO:0032550//GO:0032555//GO:0017076//GO:0097159//GO:0043167//GO:0001883//GO:1901265	purine ribonucleoside triphosphate binding//molecular_function//adenyl nucleotide binding//protein binding//binding//carbohydrate derivative binding//adenyl ribonucleotide binding//nucleotide binding//ATP binding//anion binding//ribonucleotide binding//small molecule binding//ADP binding//nucleoside binding//heterocyclic compound binding//ribonucleoside binding//purine ribonucleoside binding//pur…	no KO assigned | (RefSeq) hypothetical protein	http://www.genome.jp/dbget-bin/www_bget?pper:PRUPE_ppa025472mg	--
Pav_sc0000503.1_g330.1.mk	Pav_sc0000503.1	0	2	0	20	4	14	0	0.0961873	0	0.956982	0.239041	0.594306	0.0320624	0.596776	11.216	0.673691	4.0573	0.0018808	0.011587	UP	--	--	--	--	GO:0003674//GO:0003824//GO:0016740//GO:0008168//GO:0016741//GO:0008171	molecular_function//catalytic activity//transferase activity//methyltransferase activity//transferase activity, transferring one-carbon groups//O-methyltransferase activity	K00588 caffeoyl-CoA O-methyltransferase [EC:2.1.1.104] | (RefSeq) hypothetical protein	http://www.genome.jp/dbget-bin/www_bget?pper:PRUPE_ppa021814mg	PREDICTED: flavonoid 3',5'-methyltransferase-like
Pav_sc0001289.1_g500.1.mk	Pav_sc0001289.1	14	15	9	215	195	286	0.747956	0.770369	0.582936	10.9858	12.4442	12.9649	0.70042	12.1316	214.517	13.2657	4.0153	8.9147e-39	1.9114e-36	UP	--	--	--	--	--	--	no KO assigned | (RefSeq) hypothetical protein	http://www.genome.jp/dbget-bin/www_bget?pper:PRUPE_ppa024027mg	PREDICTED: probable WRKY transcription factor 71
Pav_sc0002858.1_g270.1.br	Pav_sc0002858.1	515	342	288	7596	5572	7438	29.8069	19.0281	20.2084	420.475	385.217	365.275	23.0145	390.322	6367.96	400.71	3.9902	6.1422e-105	1.0912e-101	UP	GO:0008152//GO:0044711//GO:0051188//GO:0033013//GO:0008150//GO:1901566//GO:0044271//GO:0046483//GO:1901576//GO:0044249//GO:0044699//GO:0034641//GO:0006807//GO:0044283//GO:0009987//GO:0044237//GO:0006766//GO:0006725//GO:1901362//GO:0019438//GO:0018130//GO:0051186//GO:0006767//GO:0009110//GO:1901564//GO:0009235//GO:0042364//GO:0009058//GO:0009236//GO:0044281//GO:0044763//GO:0044710//GO:0071704//GO:…	metabolic process//single-organism biosynthetic process//cofactor biosynthetic process//tetrapyrrole metabolic process//biological_process//organonitrogen compound biosynthetic process//cellular nitrogen compound biosynthetic process//heterocycle metabolic process//organic substance biosynthetic process//cellular biosynthetic process//single-organism process//cellular nitrogen compound metabolic …	--	--	GO:0016301//GO:0005488//GO:0003674//GO:0048037//GO:0036094//GO:0016773//GO:0003824//GO:0000166//GO:0016740//GO:0043752//GO:1901363//GO:0050662//GO:0016772//GO:1901265//GO:0097159//GO:0016491	kinase activity//binding//molecular_function//cofactor binding//small molecule binding//phosphotransferase activity, alcohol group as acceptor//catalytic activity//nucleotide binding//transferase activity//adenosylcobinamide kinase activity//heterocyclic compound binding//coenzyme binding//transferase activity, transferring phosphorus-containing groups//nucleoside phosphate binding//organic cycli…	K08081 tropinone reductase I [EC:1.1.1.206] | (RefSeq) hypothetical protein	http://www.genome.jp/dbget-bin/www_bget?pper:PRUPE_ppa009944mg	PREDICTED: tropinone reductase homolog At1g07440-like
Pav_sc0000591.1_g140.1.mk	Pav_sc0000591.1	0	1	1	17	12	6	0	0.0216812	0.0273435	0.366706	0.323288	0.114823	0.0163416	0.268272	11.2415	0.722524	3.9596	0.00073213	0.0052568	UP	GO:0006629//GO:0008150//GO:0006915//GO:0016265//GO:0012501//GO:0065007//GO:0008152//GO:0009987//GO:0071704//GO:0050794//GO:0044710//GO:0043067//GO:0044699//GO:0050789//GO:0010941//GO:0044238//GO:0008219//GO:0044763//GO:0042981	lipid metabolic process//biological_process//apoptotic process//death//programmed cell death//biological regulation//metabolic process//cellular process//organic substance metabolic process//regulation of cellular process//single-organism metabolic process//regulation of programmed cell death//single-organism process//regulation of biological process//regulation of cell death//primary metabolic p…	--	--	--	--	no KO assigned | (RefSeq) hypothetical protein	http://www.genome.jp/dbget-bin/www_bget?pper:PRUPEppa1027212mg	PREDICTED: uncharacterized protein LOC103332249
Pav_sc0001381.1_g010.1.mk	Pav_sc0001381.1	1	1	0	19	9	7	0.032019	0.0307799	0	0.581845	0.344219	0.190178	0.020933	0.372081	10.9613	0.675551	4.0202	0.00081522	0.0057586	UP	GO:0008152//GO:0006508//GO:0008150//GO:0044238//GO:0043170//GO:0019538//GO:0071704	metabolic process//proteolysis//biological_process//primary metabolic process//macromolecule metabolic process//protein metabolic process//organic substance metabolic process	--	--	GO:0003674//GO:0070011//GO:0003824//GO:0016787//GO:0008233//GO:0004197//GO:0008234//GO:0004175	molecular_function//peptidase activity, acting on L-amino acid peptides//catalytic activity//hydrolase activity//peptidase activity//cysteine-type endopeptidase activity//cysteine-type peptidase activity//endopeptidase activity	no KO assigned | (RefSeq) hypothetical protein	http://www.genome.jp/dbget-bin/www_bget?pper:PRUPE_ppa007174mg	PREDICTED: metacaspase-1-like
Pav_sc0000864.1_g300.1.br	Pav_sc0000864.1	1	2	2	30	21	40	0.0143376	0.0275655	0.0347646	0.41138	0.35965	0.48662	0.0255559	0.419217	27.5915	1.78375	3.9512	3.7493e-08	7.8894e-07	UP	GO:0044699//GO:1901576//GO:0044249//GO:0046483//GO:0044271//GO:1901566//GO:0008150//GO:0033013//GO:0008152//GO:0055114//GO:1901360//GO:0033014//GO:0044710//GO:0071704//GO:0009058//GO:1901564//GO:0018130//GO:1901362//GO:0019438//GO:0006725//GO:0009987//GO:0044237//GO:0006807//GO:0034641	single-organism process//organic substance biosynthetic process//cellular biosynthetic process//heterocycle metabolic process//cellular nitrogen compound biosynthetic process//organonitrogen compound biosynthetic process//biological_process//tetrapyrrole metabolic process//metabolic process//oxidation-reduction process//organic cyclic compound metabolic process//tetrapyrrole biosynthetic process/…	--	--	GO:0000166//GO:0003824//GO:0036094//GO:0048037//GO:0008883//GO:0003674//GO:0005488//GO:0005515//GO:0050661//GO:0016491//GO:0097159//GO:0016620//GO:1901265//GO:0050662//GO:0016903//GO:1901363	nucleotide binding//catalytic activity//small molecule binding//cofactor binding//glutamyl-tRNA reductase activity//molecular_function//binding//protein binding//NADP binding//oxidoreductase activity//organic cyclic compound binding//oxidoreductase activity, acting on the aldehyde or oxo group of donors, NAD or NADP as acceptor//nucleoside phosphate binding//coenzyme binding//oxidoreductase activ…	no KO assigned | (RefSeq) hypothetical protein	http://www.genome.jp/dbget-bin/www_bget?pper:PRUPE_ppa015767mg	PREDICTED: receptor-like protein 12
Pav_sc0000586.1_g740.1.mk	Pav_sc0000586.1	1	2	1	31	24	14	0.0305091	0.0586569	0.0369879	0.904558	0.874631	0.362419	0.0420513	0.713869	22.1194	1.39807	3.9838	1.1299e-05	0.00014087	UP	GO:0051704//GO:0044403//GO:0009987//GO:0008150//GO:0044764//GO:0016032//GO:0044419	multi-organism process//symbiosis, encompassing mutualism through parasitism//cellular process//biological_process//multi-organism cellular process//viral process//interspecies interaction between organisms	--	--	--	--	no KO assigned | (RefSeq) hypothetical protein	http://www.genome.jp/dbget-bin/www_bget?pper:PRUPE_ppa024582mg	PREDICTED: proline-rich receptor-like protein kinase PERK2
Pav_sc0000220.1_g1310.1.mk	Pav_sc0000220.1	1	2	0	29	16	6	0.0303327	0.0583178	0	0.841308	0.579717	0.154425	0.0295502	0.52515	16.3471	1.0124	4.0132	0.0039482	0.021123	UP	--	--	--	--	--	--	no KO assigned | (RefSeq) hypothetical protein	http://www.genome.jp/dbget-bin/www_bget?pper:PRUPE_ppa006561mg	PREDICTED: protein PHR1-LIKE 1-like
Pav_sc0010253.1_g030.1.mk	Pav_sc0010253.1	38	44	36	706	536	857	1.02787	1.14411	1.18056	18.2644	17.3183	19.6694	1.11752	18.4174	642.821	41.5764	3.9506	4.8447e-67	2.939e-64	UP	GO:1901564//GO:0009063//GO:1901606//GO:1901565//GO:0009987//GO:0044237//GO:0006807//GO:0044282//GO:0071704//GO:0044710//GO:0044763//GO:0044281//GO:1901605//GO:0008150//GO:0019478//GO:0009056//GO:0006082//GO:0046395//GO:0044248//GO:0006950//GO:0008152//GO:0050896//GO:0019752//GO:0055114//GO:0046416//GO:0006520//GO:0044699//GO:0006979//GO:1901575//GO:0044238//GO:0044712//GO:0016054//GO:0043436	organonitrogen compound metabolic process//cellular amino acid catabolic process//alpha-amino acid catabolic process//organonitrogen compound catabolic process//cellular process//cellular metabolic process//nitrogen compound metabolic process//small molecule catabolic process//organic substance metabolic process//single-organism metabolic process//single-organism cellular process//small molecule …	GO:0005575//GO:0005622//GO:0044424//GO:0044464//GO:0005737//GO:0005623	cellular_component//intracellular//intracellular part//cell part//cytoplasm//cell	GO:0016209//GO:1901363//GO:0016491//GO:0016684//GO:0097159//GO:0046906//GO:0016788//GO:0003674//GO:0005488//GO:0003824//GO:0016787//GO:0020037//GO:0004601	antioxidant activity//heterocyclic compound binding//oxidoreductase activity//oxidoreductase activity, acting on peroxide as acceptor//organic cyclic compound binding//tetrapyrrole binding//hydrolase activity, acting on ester bonds//molecular_function//binding//catalytic activity//hydrolase activity//heme binding//peroxidase activity	K00430 peroxidase [EC:1.11.1.7] | (RefSeq) hypothetical protein	http://www.genome.jp/dbget-bin/www_bget?pper:PRUPE_ppa017084mg	PREDICTED: peroxidase 19
Pav_sc0000009.1_g950.1.mk	Pav_sc0000009.1	1	4	3	56	38	47	0.0338068	0.129994	0.122958	1.81066	1.53452	1.3482	0.0955861	1.56446	43.6901	2.84312	3.9418	1.1305e-11	3.8837e-10	UP	--	--	GO:0044425//GO:0016020//GO:0005575//GO:0016021//GO:0031224	membrane part//membrane//cellular_component//integral component of membrane//intrinsic component of membrane	GO:0046914//GO:0046872//GO:0043167//GO:0043169//GO:0003674//GO:0005488//GO:0008270	transition metal ion binding//metal ion binding//ion binding//cation binding//molecular_function//binding//zinc ion binding	no KO assigned | (RefSeq) hypothetical protein	http://www.genome.jp/dbget-bin/www_bget?pper:PRUPE_ppa006176mg	PREDICTED: protein ALTERED XYLOGLUCAN 4-like
Pav_sc0000502.1_g370.1.mk	Pav_sc0000502.1	2	2	2	33	9	72	0.18095	0.173948	0.219376	2.85555	0.97265	5.52734	0.191425	3.11851	32.4237	2.12246	3.9332	0.0045067	0.023633	UP	GO:0009059//GO:0010556//GO:0060255//GO:0009058//GO:0006351//GO:0050789//GO:0097659//GO:0016070//GO:0071704//GO:0032774//GO:0080090//GO:1901360//GO:0019219//GO:0044237//GO:0009987//GO:0009889//GO:0006355//GO:0034641//GO:0006807//GO:0090304//GO:2001141//GO:0043170//GO:0019222//GO:2000112//GO:0006725//GO:0019438//GO:1901362//GO:0018130//GO:0044238//GO:0046483//GO:1903506//GO:0031326//GO:0006139//GO:…	macromolecule biosynthetic process//regulation of macromolecule biosynthetic process//regulation of macromolecule metabolic process//biosynthetic process//transcription, DNA-templated//regulation of biological process//nucleic acid-templated transcription//RNA metabolic process//organic substance metabolic process//RNA biosynthetic process//regulation of primary metabolic process//organic cyclic …	--	--	GO:0001071//GO:0003700//GO:0003674	nucleic acid binding transcription factor activity//transcription factor activity, sequence-specific DNA binding//molecular_function	no KO assigned | (RefSeq) hypothetical protein	http://www.genome.jp/dbget-bin/www_bget?pper:PRUPE_ppa012354mg	PREDICTED: ethylene-responsive transcription factor ERF021-like
Novel00078	Pav_sc0000062.1	6	12	11	157	95	279	0.209902	0.403559	0.466541	5.25305	3.96985	8.28179	0.360001	5.8349	157.243	10.3168	3.9299	8.2949e-09	1.9408e-07	UP	GO:0006464//GO:0006468//GO:0044260//GO:0044267//GO:0008152//GO:0008150//GO:0006796//GO:0044238//GO:0043412//GO:0016310//GO:0009987//GO:0044237//GO:0006793//GO:0043170//GO:0019538//GO:0071704//GO:0036211	cellular protein modification process//protein phosphorylation//cellular macromolecule metabolic process//cellular protein metabolic process//metabolic process//biological_process//phosphate-containing compound metabolic process//primary metabolic process//macromolecule modification//phosphorylation//cellular process//cellular metabolic process//phosphorus metabolic process//macromolecule metabol…	--	--	GO:0016301//GO:0032559//GO:0097367//GO:0005515//GO:0005488//GO:0003674//GO:0035639//GO:0030554//GO:0001882//GO:0043168//GO:0032553//GO:0036094//GO:0016773//GO:0003824//GO:0004672//GO:0000166//GO:0005524//GO:0016740//GO:0032550//GO:1901363//GO:0032549//GO:0016772//GO:0043167//GO:1901265//GO:0001883//GO:0032555//GO:0097159//GO:0017076	kinase activity//adenyl ribonucleotide binding//carbohydrate derivative binding//protein binding//binding//molecular_function//purine ribonucleoside triphosphate binding//adenyl nucleotide binding//nucleoside binding//anion binding//ribonucleotide binding//small molecule binding//phosphotransferase activity, alcohol group as acceptor//catalytic activity//protein kinase activity//nucleotide bindin…	no KO assigned | (RefSeq) hypothetical protein	http://www.genome.jp/dbget-bin/www_bget?pper:PRUPE_ppa005064mg	--
Pav_sc0004349.1_g020.1.br	Pav_sc0004349.1	1	0	0	6	5	8	0.11491	0	0	0.65941	0.686298	0.780013	0.0383034	0.708574	5.82311	0.338706	4.1037	0.018398	0.072382	FALSE	--	--	--	--	--	--	no KO assigned | (RefSeq) hypothetical protein	http://www.genome.jp/dbget-bin/www_bget?pper:PRUPE_ppa001520mg	PREDICTED: pentatricopeptide repeat-containing protein At5g02830, chloroplastic
Pav_sc0001925.1_g070.1.mk	Pav_sc0001925.1	2	0	0	15	9	10	0.139728	0	0	1.00228	0.75107	0.592799	0.046576	0.78205	10.5651	0.677412	3.9631	0.001075	0.0072693	UP	--	--	--	--	--	--	no KO assigned | (RefSeq) hypothetical protein	http://www.genome.jp/dbget-bin/www_bget?pper:PRUPE_ppa015809mg	PREDICTED: selT-like protein
Pav_sc0000175.1_g550.1.mk	Pav_sc0000175.1	4	2	1	48	26	46	0.0784519	0.037708	0.0237779	0.90039	0.609118	0.765518	0.0466459	0.758342	36.4643	2.41419	3.9169	4.84e-10	1.3541e-08	UP	GO:0008150//GO:0006508//GO:0008152//GO:0044238//GO:0019538//GO:0043170//GO:0071704	biological_process//proteolysis//metabolic process//primary metabolic process//protein metabolic process//macromolecule metabolic process//organic substance metabolic process	GO:0031224//GO:0016020//GO:0005575//GO:0016021//GO:0044425	intrinsic component of membrane//membrane//cellular_component//integral component of membrane//membrane part	GO:0017171//GO:0003674//GO:0003824//GO:0004252//GO:0016787//GO:0070011//GO:0008233//GO:0008236//GO:0004175	serine hydrolase activity//molecular_function//catalytic activity//serine-type endopeptidase activity//hydrolase activity//peptidase activity, acting on L-amino acid peptides//peptidase activity//serine-type peptidase activity//endopeptidase activity	no KO assigned | (RefSeq) hypothetical protein	http://www.genome.jp/dbget-bin/www_bget?pper:PRUPE_ppa001956mg	PREDICTED: subtilisin-like protease
Novel00342	Pav_sc0000529.1	2	13	3	96	79	131	0.119414	0.746151	0.217158	5.48202	5.63424	6.63665	0.360907	5.91763	93.5865	6.21343	3.9128	3.7237e-21	3.0266e-19	UP	GO:0044710//GO:0008152//GO:0055114//GO:0008150//GO:0044699	single-organism metabolic process//metabolic process//oxidation-reduction process//biological_process//single-organism process	--	--	GO:1901363//GO:0043169//GO:0050662//GO:0016638//GO:0043167//GO:1901265//GO:0046914//GO:0016491//GO:0046872//GO:0097159//GO:0016641//GO:0008270//GO:0005488//GO:0004733//GO:0097367//GO:0003674//GO:0010181//GO:0048037//GO:0003824//GO:0000166//GO:0032553//GO:0043168//GO:0036094	heterocyclic compound binding//cation binding//coenzyme binding//oxidoreductase activity, acting on the CH-NH2 group of donors//ion binding//nucleoside phosphate binding//transition metal ion binding//oxidoreductase activity//metal ion binding//organic cyclic compound binding//oxidoreductase activity, acting on the CH-NH2 group of donors, oxygen as acceptor//zinc ion binding//binding//pyridoxamin…	K14290 exportin-1 | (RefSeq) hypothetical protein	http://www.genome.jp/dbget-bin/www_bget?pper:PRUPE_ppa000601mg	--
Pav_sc0002811.1_g020.1.br	Pav_sc0002811.1	0	1	1	16	8	10	0	0.0588851	0.0742636	0.937371	0.585356	0.519756	0.0443829	0.680828	10.4826	0.722524	3.8588	0.0010885	0.0073485	UP	GO:0044703//GO:0019953//GO:0009987//GO:0009988//GO:0000003//GO:0008037//GO:0022414//GO:0044763//GO:0008150//GO:0044702//GO:0051704//GO:0007339//GO:0009566//GO:0035036//GO:0044699//GO:0007338	multi-organism reproductive process//sexual reproduction//cellular process//cell-cell recognition//reproduction//cell recognition//reproductive process//single-organism cellular process//biological_process//single organism reproductive process//multi-organism process//binding of sperm to zona pellucida//fertilization//sperm-egg recognition//single-organism process//single fertilization	GO:0005575//GO:0005576	cellular_component//extracellular region	--	--	no KO assigned | (RefSeq) hypothetical protein	http://www.genome.jp/dbget-bin/www_bget?pper:PRUPE_ppa022346mg	hypothetical protein VITISV_027369
Pav_sc0001025.1_g310.1.mk	Pav_sc0001025.1	124	43	21	1298	942	787	9.85906	3.28656	2.02425	98.7038	89.4641	53.0936	5.05662	80.4205	955.589	64.5831	3.8872	2.2415e-12	8.3209e-11	UP	--	--	--	--	--	--	no KO assigned | (RefSeq) hypothetical protein	http://www.genome.jp/dbget-bin/www_bget?pper:PRUPE_ppa012821mg	PREDICTED: protein PHLOEM PROTEIN 2-LIKE A1-like
Pav_sc0000112.1_g100.1.mk	Pav_sc0000112.1	30	22	7	477	230	265	1.96511	1.38531	0.555896	29.8833	17.996	14.7287	1.3021	20.8694	300.465	20.2715	3.8897	1.5396e-08	3.4749e-07	UP	GO:0008150//GO:0050896//GO:0006950	biological_process//response to stimulus//response to stress	--	--	--	--	no KO assigned | (RefSeq) hypothetical protein	http://www.genome.jp/dbget-bin/www_bget?pper:PRUPE_ppa011744mg	PREDICTED: universal stress protein A-like protein
Pav_sc0000691.1_g800.1.br	Pav_sc0000691.1	4	5	1	64	47	52	0.129303	0.155374	0.0391904	1.97868	1.81481	1.42629	0.107956	1.73993	50.8365	3.42473	3.8918	8.1006e-13	3.1679e-11	UP	GO:0008152//GO:0008150	metabolic process//biological_process	--	--	GO:0003674//GO:0003824//GO:0016758//GO:0016740//GO:0016757	molecular_function//catalytic activity//transferase activity, transferring hexosyl groups//transferase activity//transferase activity, transferring glycosyl groups	K21374 7-deoxyloganetin glucosyltransferase [EC:2.4.1.324] | (RefSeq) hypothetical protein	http://www.genome.jp/dbget-bin/www_bget?pper:PRUPE_ppa021058mg	PREDICTED: UDP-glycosyltransferase 85A2-like
Pav_sc0001175.1_g150.1.mk	Pav_sc0001175.1	8	0	1	69	41	33	0.358808	0	0.0543754	2.95983	2.19654	1.25585	0.137728	2.13741	44.9904	3.09532	3.8615	1.3392e-06	2.0858e-05	UP	--	--	--	--	--	--	no KO assigned | (RefSeq) hypothetical protein	http://www.genome.jp/dbget-bin/www_bget?pper:PRUPE_ppa014570mg	PREDICTED: transcription repressor OFP7-like
Pav_sc0000174.1_g1380.1.mk	Pav_sc0000174.1	11	2	7	132	99	90	0.235072	0.0410863	0.181358	2.69791	2.52713	1.63194	0.152505	2.28566	101.049	7.0992	3.8313	7.4234e-15	3.5713e-13	UP	GO:0006811//GO:0008150//GO:0006810//GO:1902578//GO:0006812//GO:0051179//GO:0044765//GO:0051234//GO:0044699//GO:0030001	ion transport//biological_process//transport//single-organism localization//cation transport//localization//single-organism transport//establishment of localization//single-organism process//metal ion transport	--	--	GO:0043169//GO:0005488//GO:0003674//GO:0043167//GO:0046872	cation binding//binding//molecular_function//ion binding//metal ion binding	no KO assigned | (RefSeq) hypothetical protein	http://www.genome.jp/dbget-bin/www_bget?pper:PRUPE_ppa009759mg	PREDICTED: extensin-like
Pav_sc0000428.1_g630.1.br	Pav_sc0000428.1	1	2	0	14	15	19	0.053365	0.1026	0	0.714547	0.956164	0.860328	0.0519883	0.84368	14.9459	1.0124	3.8839	9.5028e-05	0.00092109	UP	--	--	--	--	--	--	--	--	PREDICTED: uncharacterized abhydrolase domain-containing protein DDB_G0269086-like
Pav_sc0001084.1_g100.1.mk	Pav_sc0001084.1	0	2	3	31	30	18	0	0.100666	0.190434	1.55239	1.87629	0.799687	0.0970335	1.40945	25.4691	1.83073	3.7983	3.686e-06	5.1504e-05	UP	GO:0044699//GO:0042549//GO:0050789//GO:0043467//GO:0044710//GO:0050794//GO:0031323//GO:0006091//GO:0015979//GO:0042548//GO:0010109//GO:0019222//GO:0008150//GO:0009987//GO:0008152//GO:0044237//GO:0065007//GO:0019684//GO:0055114	single-organism process//photosystem II stabilization//regulation of biological process//regulation of generation of precursor metabolites and energy//single-organism metabolic process//regulation of cellular process//regulation of cellular metabolic process//generation of precursor metabolites and energy//photosynthesis//regulation of photosynthesis, light reaction//regulation of photosynthesis/…	GO:0044436//GO:0009539//GO:0044425//GO:0009521//GO:0044424//GO:0005623//GO:0043234//GO:0032991//GO:0009579//GO:0098796//GO:0016020//GO:0034357//GO:0005622//GO:0044464//GO:0005575//GO:0009523	thylakoid part//photosystem II reaction center//membrane part//photosystem//intracellular part//cell//protein complex//macromolecular complex//thylakoid//membrane protein complex//membrane//photosynthetic membrane//intracellular//cell part//cellular_component//photosystem II	GO:0003824//GO:0016491//GO:0003674	catalytic activity//oxidoreductase activity//molecular_function	K05933 aminocyclopropanecarboxylate oxidase [EC:1.14.17.4] | (RefSeq) hypothetical protein	http://www.genome.jp/dbget-bin/www_bget?pper:PRUPE_ppa008813mg	PREDICTED: 1-aminocyclopropane-1-carboxylate oxidase 1
Pav_sc0010414.1_g030.1.br	Pav_sc0010414.1	8	2	7	101	85	87	0.145935	0.0350718	0.154809	1.76212	1.85213	1.34661	0.111938	1.65362	85.6649	6.08309	3.8158	3.1386e-19	2.1505e-17	UP	--	--	--	--	GO:0005515//GO:0005488//GO:0003674	protein binding//binding//molecular_function	no KO assigned | (RefSeq) hypothetical protein	http://www.genome.jp/dbget-bin/www_bget?pper:PRUPE_ppa020745mg	PREDICTED: putative disease resistance RPP13-like protein 1
Pav_sc0000084.1_g100.1.mk	Pav_sc0000084.1	18	2	2	143	108	93	0.985058	0.105215	0.132693	7.48464	7.05988	4.31843	0.407656	6.28765	108.559	7.54175	3.8474	3.0523e-12	1.1264e-10	UP	GO:0044710//GO:0071704//GO:0006629//GO:0044238//GO:0044699//GO:0008152//GO:0008150	single-organism metabolic process//organic substance metabolic process//lipid metabolic process//primary metabolic process//single-organism process//metabolic process//biological_process	GO:0044425//GO:0016021//GO:0005575//GO:0016020//GO:0031224	membrane part//integral component of membrane//cellular_component//membrane//intrinsic component of membrane	--	--	no KO assigned | (RefSeq) hypothetical protein	http://www.genome.jp/dbget-bin/www_bget?pper:PRUPE_ppa009675mg	PREDICTED: tetraspanin-6
Pav_sc0000588.1_g290.1.mk	Pav_sc0000588.1	2	2	0	31	16	16	0.491959	0.472921	0	7.293	4.70114	3.33943	0.321627	5.11119	19.6031	1.3511	3.8589	7.352e-06	9.6802e-05	UP	--	--	--	--	--	--	no KO assigned | (RefSeq) hypothetical protein	http://www.genome.jp/dbget-bin/www_bget?pper:PRUPE_ppa015953mg	-\-
Pav_sc0002233.1_g010.1.br	Pav_sc0002233.1	0	2	0	8	14	8	0	0.137995	0	0.549174	1.20029	0.487212	0.0459984	0.745559	9.84918	0.673691	3.8698	0.0024475	0.014278	UP	--	--	--	--	--	--	no KO assigned | (RefSeq) hypothetical protein	http://www.genome.jp/dbget-bin/www_bget?pper:PRUPE_ppb019197mg	PREDICTED: putative ribonuclease H protein At1g65750
Pav_sc0001255.1_g060.1.mk	Pav_sc0001255.1	3	0	1	41	14	8	0.206236	0	0.0833439	2.69571	1.14962	0.466645	0.0965267	1.43733	19.6984	1.4018	3.8127	0.015096	0.061775	FALSE	--	--	--	--	--	--	no KO assigned | (RefSeq) hypothetical protein	http://www.genome.jp/dbget-bin/www_bget?pper:PRUPE_ppa010996mg	PREDICTED: vacuolar iron transporter homolog 4-like
Pav_sc0001328.1_g250.1.br	Pav_sc0001328.1	1	1	0	12	7	13	0.0506196	0.0486607	0	0.580959	0.423254	0.558362	0.0330934	0.520858	9.70545	0.675551	3.8447	0.0019101	0.011733	UP	--	--	--	--	--	--	no KO assigned | (RefSeq) hypothetical protein	http://www.genome.jp/dbget-bin/www_bget?pper:PRUPE_ppa026846mg	PREDICTED: probable disease resistance protein At4g27220
Pav_sc0000740.1_g550.1.mk	Pav_sc0000740.1	1	8	3	73	46	72	0.0314854	0.242135	0.114514	2.19825	1.73002	1.92351	0.129378	1.95059	58.4598	4.1905	3.8022	2.5682e-14	1.1677e-12	UP	--	--	--	--	GO:0003674//GO:0005488//GO:0005515	molecular_function//binding//protein binding	no KO assigned | (RefSeq) hypothetical protein	http://www.genome.jp/dbget-bin/www_bget?pper:PRUPE_ppa008057mg	PREDICTED: F-box protein At1g67340
Pav_sc0000634.1_g020.1.br	Pav_sc0000634.1	0	1	1	18	9	4	0	0.0406814	0.0513058	0.728541	0.454949	0.143631	0.0306624	0.442374	9.86507	0.722524	3.7712	0.0070118	0.033616	UP	GO:0034645//GO:1901564//GO:1901566//GO:0008150//GO:0019538//GO:0043170//GO:0044237//GO:0006518//GO:0008152//GO:0009987//GO:0043603//GO:0044260//GO:0044267//GO:0006807//GO:0034641//GO:0043043//GO:0010467//GO:0043604//GO:1901576//GO:0044249//GO:0071704//GO:0006412//GO:0009059//GO:0044238//GO:0044271//GO:0009058	cellular macromolecule biosynthetic process//organonitrogen compound metabolic process//organonitrogen compound biosynthetic process//biological_process//protein metabolic process//macromolecule metabolic process//cellular metabolic process//peptide metabolic process//metabolic process//cellular process//cellular amide metabolic process//cellular macromolecule metabolic process//cellular protein …	GO:0043228//GO:0043226//GO:0005575//GO:0043229//GO:0005622//GO:0044464//GO:0005737//GO:0030529//GO:0043232//GO:0044424//GO:0005623//GO:0005840//GO:0044444//GO:0032991	non-membrane-bounded organelle//organelle//cellular_component//intracellular organelle//intracellular//cell part//cytoplasm//ribonucleoprotein complex//intracellular non-membrane-bounded organelle//intracellular part//cell//ribosome//cytoplasmic part//macromolecular complex	GO:0030554//GO:0003674//GO:0005488//GO:0032549//GO:1901363//GO:0097367//GO:0032550//GO:0032559//GO:0003735//GO:0000166//GO:0003824//GO:0016787//GO:0036094//GO:0097159//GO:0017076//GO:0032553//GO:0032555//GO:0043168//GO:0005198//GO:0001883//GO:1901265//GO:0043167//GO:0001882//GO:0043531	adenyl nucleotide binding//molecular_function//binding//ribonucleoside binding//heterocyclic compound binding//carbohydrate derivative binding//purine ribonucleoside binding//adenyl ribonucleotide binding//structural constituent of ribosome//nucleotide binding//catalytic activity//hydrolase activity//small molecule binding//organic cyclic compound binding//purine nucleotide binding//ribonucleotid…	no KO assigned | (RefSeq) hypothetical protein	http://www.genome.jp/dbget-bin/www_bget?pper:PRUPE_ppa015789mg	PREDICTED: putative disease resistance protein RGA3
Pav_sc0002009.1_g120.1.mk	Pav_sc0002009.1	0	3	0	28	15	1	0	0.648577	0	6.02261	4.02955	0.190825	0.216192	3.41433	14.338	1.01054	3.8267	0.035793	0.12089	FALSE	--	--	--	--	--	--	--	--	-\-
Pav_sc0000600.1_g990.1.br	Pav_sc0000600.1	1	3	0	29	15	18	0.0493501	0.142321	0	1.36877	0.884227	0.753728	0.0638904	1.00224	19.157	1.34924	3.8276	9.698e-06	0.00012319	UP	GO:0044710//GO:0071704//GO:0044763//GO:0044281//GO:0006631//GO:0006629//GO:0032787//GO:0044237//GO:0009987//GO:0044699//GO:0044238//GO:0043436//GO:0006082//GO:0008150//GO:0044255//GO:0008152//GO:0055114//GO:0019752	single-organism metabolic process//organic substance metabolic process//single-organism cellular process//small molecule metabolic process//fatty acid metabolic process//lipid metabolic process//monocarboxylic acid metabolic process//cellular metabolic process//cellular process//single-organism process//primary metabolic process//oxoacid metabolic process//organic acid metabolic process//biologic…	GO:0044424//GO:0043227//GO:0005622//GO:0005575//GO:0005623//GO:0043226//GO:0044464//GO:0005634//GO:0043231//GO:0043229	intracellular part//membrane-bounded organelle//intracellular//cellular_component//cell//organelle//cell part//nucleus//intracellular membrane-bounded organelle//intracellular organelle	GO:0016491//GO:0016614//GO:0016616//GO:0003824//GO:0003857//GO:0003674	oxidoreductase activity//oxidoreductase activity, acting on CH-OH group of donors//oxidoreductase activity, acting on the CH-OH group of donors, NAD or NADP as acceptor//catalytic activity//3-hydroxyacyl-CoA dehydrogenase activity//molecular_function	no KO assigned | (RefSeq) hypothetical protein	http://www.genome.jp/dbget-bin/www_bget?pper:PRUPE_ppa020689mg	PREDICTED: putative DNA-binding protein ESCAROLA
Novel00142	Pav_sc0000138.1	0	1	1	8	14	8	0	0.0540481	0.0681634	0.430186	0.940228	0.381649	0.0407372	0.584021	9.84918	0.722524	3.7689	0.002411	0.014116	UP	GO:0008152//GO:0008380//GO:0044260//GO:0008150//GO:0044238//GO:0046483//GO:0006139//GO:0000376//GO:0010467//GO:0044237//GO:0009987//GO:0006396//GO:0034641//GO:0006807//GO:0090304//GO:0043170//GO:0006725//GO:0000372//GO:0016070//GO:0000375//GO:0071704//GO:1901360	metabolic process//RNA splicing//cellular macromolecule metabolic process//biological_process//primary metabolic process//heterocycle metabolic process//nucleobase-containing compound metabolic process//RNA splicing, via transesterification reactions with guanosine as nucleophile//gene expression//cellular metabolic process//cellular process//RNA processing//cellular nitrogen compound metabolic p…	GO:0044464//GO:0005623//GO:0005622//GO:0005575//GO:0030529//GO:0044424//GO:0032991	cell part//cell//intracellular//cellular_component//ribonucleoprotein complex//intracellular part//macromolecular complex	--	--	--	--	--
Pav_sc0000103.1_g670.1.mk	Pav_sc0000103.1	47	10	8	502	254	226	1.1555	0.236337	0.238448	11.8038	7.45918	4.71449	0.543429	7.99249	306.701	22.3731	3.777	2.9676e-06	4.237e-05	UP	GO:0044763//GO:0051179//GO:1902578//GO:0009987//GO:0055085//GO:0044699//GO:0051234//GO:0044765//GO:0006810//GO:0008150	single-organism cellular process//localization//single-organism localization//cellular process//transmembrane transport//single-organism process//establishment of localization//single-organism transport//transport//biological_process	GO:0044425//GO:0016020//GO:0005575//GO:0016021//GO:0031224	membrane part//membrane//cellular_component//integral component of membrane//intrinsic component of membrane	--	--	K13947 auxin efflux carrier family | (RefSeq) hypothetical protein	http://www.genome.jp/dbget-bin/www_bget?pper:PRUPE_ppa002944mg	PREDICTED: probable auxin efflux carrier component 1c
Pav_sc0000069.1_g130.1.mk	Pav_sc0000069.1	2	5	1	26	29	72	0.228155	0.548314	0.138303	2.83674	3.95168	6.96925	0.304924	4.58589	37.9548	2.74732	3.7882	2.1229e-05	0.00024652	UP	--	--	--	--	--	--	K09422 myb proto-oncogene protein, plant | (RefSeq) hypothetical protein	http://www.genome.jp/dbget-bin/www_bget?pper:PRUPE_ppa022205mg	PREDICTED: myb-related protein Zm38-like
Pav_sc0012348.1_g010.1.br	Pav_sc0012348.1	21	6	4	188	152	124	3.03299	0.833035	0.700394	25.969	26.2229	15.1959	1.52214	22.4626	146.998	10.6766	3.7833	3.5497e-12	1.3003e-10	UP	--	--	--	--	--	--	no KO assigned | (RefSeq) hypothetical protein	http://www.genome.jp/dbget-bin/www_bget?pper:PRUPE_ppa013698mg	PREDICTED: uncharacterized protein LOC103323136
Pav_sc0003944.1_g110.1.br	Pav_sc0003944.1	0	0	3	21	11	16	0	0	0.0758374	0.418791	0.273974	0.283078	0.0252791	0.325281	14.7134	1.15703	3.6686	9.7737e-05	0.00094258	UP	--	--	--	--	GO:0005515//GO:0005488//GO:0003674	protein binding//binding//molecular_function	no KO assigned | (RefSeq) hypothetical protein	http://www.genome.jp/dbget-bin/www_bget?pper:PRUPE_ppa025449mg	PREDICTED: receptor-like protein 2
Pav_sc0002106.1_g120.1.br	Pav_sc0002106.1	2	0	2	12	21	29	0.324591	0	0.393521	1.86266	4.07109	3.99355	0.239371	3.3091	19.2942	1.44877	3.7353	9.0131e-06	0.00011576	UP	--	--	--	--	--	--	no KO assigned | (RefSeq) hypothetical protein	http://www.genome.jp/dbget-bin/www_bget?pper:PRUPE_ppa013698mg	PREDICTED: uncharacterized protein LOC103323136
Pav_sc0000383.1_g180.1.mk	Pav_sc0000383.1	3	10	5	63	88	126	0.0793305	0.254202	0.160295	1.59333	2.77962	2.82711	0.164609	2.40002	85.8369	6.31296	3.7652	3.1325e-11	1.0211e-09	UP	GO:0006950//GO:0050896//GO:0008150	response to stress//response to stimulus//biological_process	--	--	GO:0005515//GO:0005516//GO:0005488//GO:0003674	protein binding//calmodulin binding//binding//molecular_function	no KO assigned | (RefSeq) hypothetical protein	http://www.genome.jp/dbget-bin/www_bget?pper:PRUPE_ppa025469mg	hypothetical protein PRUPE_ppa025469mg, partial
Pav_sc0000055.1_g550.1.mk	Pav_sc0000055.1	2	2	0	27	22	9	0.0817095	0.0785474	0	1.055	1.07362	0.311988	0.053419	0.813534	18.834	1.3511	3.8011	0.00066264	0.0048318	UP	GO:0055114//GO:0008152//GO:0008150//GO:0044699//GO:0044710	oxidation-reduction process//metabolic process//biological_process//single-organism process//single-organism metabolic process	--	--	GO:0003674//GO:0003824//GO:0016491	molecular_function//catalytic activity//oxidoreductase activity	no KO assigned | (RefSeq) hypothetical protein	http://www.genome.jp/dbget-bin/www_bget?pper:PRUPE_ppa009452mg	PREDICTED: 1-aminocyclopropane-1-carboxylate oxidase homolog 4-like
Pav_sc0001580.1_g300.1.mk	Pav_sc0001580.1	10	27	25	330	241	390	0.265774	0.68982	0.805532	8.38827	7.65093	8.7949	0.587042	8.27803	294.021	22.1238	3.7322	1.1507e-43	3.0447e-41	UP	GO:0008150//GO:0006950//GO:0008152//GO:0051704//GO:0055114//GO:0050896//GO:0044699//GO:0009405//GO:0009636//GO:0046677//GO:0006952//GO:0042221//GO:0044710	biological_process//response to stress//metabolic process//multi-organism process//oxidation-reduction process//response to stimulus//single-organism process//pathogenesis//response to toxic substance//response to antibiotic//defense response//response to chemical//single-organism metabolic process	GO:0005576//GO:0005575	extracellular region//cellular_component	GO:0003674//GO:0005488//GO:0003824//GO:0020037//GO:1901363//GO:0043169//GO:0046914//GO:0016491//GO:0046872//GO:0097159//GO:0016705//GO:0046906//GO:0043167//GO:0005506	molecular_function//binding//catalytic activity//heme binding//heterocyclic compound binding//cation binding//transition metal ion binding//oxidoreductase activity//metal ion binding//organic cyclic compound binding//oxidoreductase activity, acting on paired donors, with incorporation or reduction of molecular oxygen//tetrapyrrole binding//ion binding//iron ion binding	K20623 typhasterol/6-deoxotyphasterol 2alpha-hydroxylase | (RefSeq) hypothetical protein	http://www.genome.jp/dbget-bin/www_bget?pper:PRUPE_ppa004436mg	PREDICTED: cytochrome P450 71A1-like
Pav_sc0006018.1_g200.1.mk	Pav_sc0006018.1	7	2	0	58	43	31	0.94187	0.258692	0	7.46391	6.91108	3.53923	0.400187	5.97141	41.9376	3.04463	3.7839	2.1332e-07	3.9041e-06	UP	--	--	--	--	--	--	no KO assigned | (RefSeq) hypothetical protein	http://www.genome.jp/dbget-bin/www_bget?pper:PRUPE_ppa013557mg	hypothetical protein POPTR_0015s09570g
Pav_sc0001141.1_g020.1.br	Pav_sc0001141.1	5	5	5	72	68	88	0.0616393	0.059254	0.0747288	0.848919	1.00134	0.920501	0.0652074	0.923586	70.7982	5.30615	3.738	2.6569e-16	1.4587e-14	UP	GO:0006950//GO:0044237//GO:0008152//GO:0009987//GO:0044260//GO:0050896//GO:0090304//GO:0006807//GO:0034641//GO:0051716//GO:0033554//GO:0008150//GO:0006259//GO:0006725//GO:0043170//GO:0046483//GO:0044763//GO:0006281//GO:0044238//GO:0006139//GO:0006310//GO:0044699//GO:1901360//GO:0006974//GO:0044710//GO:0071704	response to stress//cellular metabolic process//metabolic process//cellular process//cellular macromolecule metabolic process//response to stimulus//nucleic acid metabolic process//nitrogen compound metabolic process//cellular nitrogen compound metabolic process//cellular response to stimulus//cellular response to stress//biological_process//DNA metabolic process//cellular aromatic compound metab…	--	--	GO:0005488//GO:0005515//GO:0032549//GO:1901363//GO:0097367//GO:0032559//GO:0032550//GO:0030554//GO:0003674//GO:0035639//GO:0016887//GO:0003678//GO:0017111//GO:0016818//GO:0001883//GO:1901265//GO:0043167//GO:0016462//GO:0001882//GO:0043531//GO:0005524//GO:0000166//GO:0016817//GO:0009378//GO:0003824//GO:0004386//GO:0016787//GO:0036094//GO:0097159//GO:0017076//GO:0032553//GO:0032555//GO:0043168	binding//protein binding//ribonucleoside binding//heterocyclic compound binding//carbohydrate derivative binding//adenyl ribonucleotide binding//purine ribonucleoside binding//adenyl nucleotide binding//molecular_function//purine ribonucleoside triphosphate binding//ATPase activity//DNA helicase activity//nucleoside-triphosphatase activity//hydrolase activity, acting on acid anhydrides, in phosph…	no KO assigned | (RefSeq) hypothetical protein	http://www.genome.jp/dbget-bin/www_bget?pper:PRUPE_ppa014576mg	PREDICTED: putative disease resistance RPP13-like protein 1
Pav_sc0000113.1_g720.1.mk	Pav_sc0000113.1	8	6	10	105	92	175	0.626575	0.451745	0.94954	7.86534	8.60706	11.6299	0.675953	9.36742	112.926	8.5875	3.717	2.0224e-20	1.5243e-18	UP	GO:0006796//GO:0044238//GO:0071704//GO:0043412//GO:0036211//GO:0016310//GO:0006464//GO:0044267//GO:0044260//GO:0006468//GO:0044237//GO:0009987//GO:0008152//GO:0006793//GO:0019538//GO:0043170//GO:0008150	phosphate-containing compound metabolic process//primary metabolic process//organic substance metabolic process//macromolecule modification//protein modification process//phosphorylation//cellular protein modification process//cellular protein metabolic process//cellular macromolecule metabolic process//protein phosphorylation//cellular metabolic process//cellular process//metabolic process//phos…	--	--	GO:0001883//GO:1901265//GO:0043167//GO:0001882//GO:0032553//GO:0043168//GO:0032555//GO:0017076//GO:0097159//GO:0036094//GO:0004672//GO:0003824//GO:0016773//GO:0016740//GO:0005524//GO:0000166//GO:0016301//GO:0097367//GO:0032559//GO:0032550//GO:0032549//GO:1901363//GO:0005488//GO:0035639//GO:0003674//GO:0016772//GO:0030554	purine nucleoside binding//nucleoside phosphate binding//ion binding//nucleoside binding//ribonucleotide binding//anion binding//purine ribonucleotide binding//purine nucleotide binding//organic cyclic compound binding//small molecule binding//protein kinase activity//catalytic activity//phosphotransferase activity, alcohol group as acceptor//transferase activity//ATP binding//nucleotide binding/…	K04733 interleukin-1 receptor-associated kinase 4 [EC:2.7.11.1] | (RefSeq) hypothetical protein	http://www.genome.jp/dbget-bin/www_bget?pper:PRUPE_ppa002159mg	PREDICTED: probable L-type lectin-domain containing receptor kinase S.5
Pav_sc0010253.1_g040.1.mk	Pav_sc0010253.1	2	3	4	34	29	77	0.104371	0.150499	0.253071	1.69698	1.80773	3.40954	0.169314	2.30475	41.6721	3.23066	3.6892	1.7206e-06	2.627e-05	UP	--	--	--	--	--	--	no KO assigned | (RefSeq) hypothetical protein	http://www.genome.jp/dbget-bin/www_bget?pper:PRUPE_ppa024718mg	PREDICTED: uncharacterized protein LOC103325081
Pav_sc0000147.1_g070.1.br	Pav_sc0000147.1	4	1	1	40	12	41	0.0755951	0.0181674	0.0229121	0.723002	0.270894	0.657463	0.0388915	0.550453	27.4129	2.07735	3.722	1.2573e-05	0.00015519	UP	--	--	--	--	GO:0032549//GO:1901363//GO:0032550//GO:0017076//GO:0097159//GO:0032555//GO:0001883//GO:1901265//GO:0043167//GO:0030554//GO:0003674//GO:0005488//GO:0005515//GO:0097367//GO:0032559//GO:0000166//GO:0036094//GO:0032553//GO:0043168//GO:0043531//GO:0001882	ribonucleoside binding//heterocyclic compound binding//purine ribonucleoside binding//purine nucleotide binding//organic cyclic compound binding//purine ribonucleotide binding//purine nucleoside binding//nucleoside phosphate binding//ion binding//adenyl nucleotide binding//molecular_function//binding//protein binding//carbohydrate derivative binding//adenyl ribonucleotide binding//nucleotide bind…	no KO assigned | (RefSeq) hypothetical protein	http://www.genome.jp/dbget-bin/www_bget?pper:PRUPE_ppa019012mg	PREDICTED: putative disease resistance protein RGA4
Pav_sc0010946.1_g010.1.br	Pav_sc0010946.1	12	14	22	280	194	239	0.212899	0.23877	0.4732	4.75112	4.11129	3.59786	0.30829	4.15342	221.038	17.2652	3.6784	3.4718e-36	6.303e-34	UP	--	--	--	--	GO:0032559//GO:0032550//GO:0097367//GO:0016301//GO:0005488//GO:1901363//GO:0032549//GO:0005515//GO:0030554//GO:0016772//GO:0035639//GO:0003674//GO:0043531//GO:0001882//GO:0043167//GO:1901265//GO:0001883//GO:0017076//GO:0097159//GO:0036094//GO:0043168//GO:0032555//GO:0032553//GO:0000166//GO:0005524//GO:0016740//GO:0003824	adenyl ribonucleotide binding//purine ribonucleoside binding//carbohydrate derivative binding//kinase activity//binding//heterocyclic compound binding//ribonucleoside binding//protein binding//adenyl nucleotide binding//transferase activity, transferring phosphorus-containing groups//purine ribonucleoside triphosphate binding//molecular_function//ADP binding//nucleoside binding//ion binding//nucl…	K13457 disease resistance protein RPM1 | (RefSeq) hypothetical protein	http://www.genome.jp/dbget-bin/www_bget?pper:PRUPE_ppa024232mg	PREDICTED: disease resistance protein RPM1-like
Pav_sc0000293.1_g410.1.mk	Pav_sc0000293.1	4	11	7	103	98	120	0.237625	0.628182	0.504152	5.85216	6.95414	6.04878	0.456653	6.28503	99.99	7.75987	3.6877	7.4156e-21	5.8183e-19	UP	GO:0044238//GO:0046483//GO:1903506//GO:0031326//GO:0006139//GO:0044271//GO:0051252//GO:0010468//GO:0010467//GO:0031323//GO:1901576//GO:0044249//GO:0050794//GO:0051171//GO:0008152//GO:0065007//GO:0044260//GO:0034645//GO:0034654//GO:0008150//GO:0060255//GO:0009059//GO:0010556//GO:0009058//GO:0050789//GO:0097659//GO:0016070//GO:0006351//GO:0080090//GO:1901360//GO:0071704//GO:0032774//GO:0009889//GO:…	primary metabolic process//heterocycle metabolic process//regulation of nucleic acid-templated transcription//regulation of cellular biosynthetic process//nucleobase-containing compound metabolic process//cellular nitrogen compound biosynthetic process//regulation of RNA metabolic process//regulation of gene expression//gene expression//regulation of cellular metabolic process//organic substance …	GO:0005623//GO:0044464//GO:0005575//GO:0005622	cell//cell part//cellular_component//intracellular	GO:0051082//GO:0008270//GO:0005488//GO:0005515//GO:0003674//GO:0043167//GO:0046914//GO:0046872//GO:0043169//GO:0031072	unfolded protein binding//zinc ion binding//binding//protein binding//molecular_function//ion binding//transition metal ion binding//metal ion binding//cation binding//heat shock protein binding	no KO assigned | (RefSeq) hypothetical protein	http://www.genome.jp/dbget-bin/www_bget?pper:PRUPE_ppa026514mg	COL domain class transcription factor
Pav_sc0000095.1_g300.1.br	Pav_sc0000095.1	0	1	1	13	6	11	0	0.0197307	0.0248836	0.255195	0.147102	0.191571	0.0148715	0.197956	9.09108	0.722524	3.6533	0.0030663	0.017227	UP	GO:0022414//GO:0008037//GO:0044706//GO:0009856//GO:0044763//GO:0048544//GO:0071704//GO:0036211//GO:0007154//GO:0006793//GO:0009987//GO:0044237//GO:0044703//GO:0019538//GO:0043170//GO:0006796//GO:0032501//GO:0044238//GO:0043412//GO:0044699//GO:0016310//GO:0044267//GO:0044260//GO:0006468//GO:0051704//GO:0006464//GO:0008152//GO:0008150//GO:0009875	reproductive process//cell recognition//multi-multicellular organism process//pollination//single-organism cellular process//recognition of pollen//organic substance metabolic process//protein modification process//cell communication//phosphorus metabolic process//cellular process//cellular metabolic process//multi-organism reproductive process//protein metabolic process//macromolecule metabolic …	--	--	GO:0043167//GO:1901265//GO:0001883//GO:0004674//GO:0017076//GO:0097159//GO:0032555//GO:0032550//GO:0032549//GO:1901363//GO:0016772//GO:0001882//GO:0036094//GO:0032553//GO:0043168//GO:0016740//GO:0000166//GO:0005524//GO:0004672//GO:0016773//GO:0003824//GO:0032559//GO:0097367//GO:0016301//GO:0005488//GO:0030554//GO:0035639//GO:0003674	ion binding//nucleoside phosphate binding//purine nucleoside binding//protein serine/threonine kinase activity//purine nucleotide binding//organic cyclic compound binding//purine ribonucleotide binding//purine ribonucleoside binding//ribonucleoside binding//heterocyclic compound binding//transferase activity, transferring phosphorus-containing groups//nucleoside binding//small molecule binding//r…	no KO assigned | (RefSeq) hypothetical protein	http://www.genome.jp/dbget-bin/www_bget?pper:PRUPE_ppa026218mg	PREDICTED: G-type lectin S-receptor-like serine/threonine-protein kinase At4g27290
Pav_sc0000755.1_g180.1.mk	Pav_sc0000755.1	1	1	1	21	16	5	0.0668007	0.0642156	0.0809862	1.34167	1.27669	0.283403	0.0706675	0.967254	13.6935	1.06123	3.6897	0.0035265	0.0193	UP	--	--	--	--	--	--	no KO assigned | (RefSeq) hypothetical protein	http://www.genome.jp/dbget-bin/www_bget?pper:PRUPE_ppa007361mg	PREDICTED: protein SRG1
Pav_sc0001129.1_g120.1.mk	Pav_sc0001129.1	7	13	6	170	98	105	0.442566	0.790101	0.459898	10.2796	7.40099	5.63278	0.564188	7.77111	115.998	9.064	3.6778	2.4037e-11	7.9395e-10	UP	GO:0009987//GO:0044237//GO:0019219//GO:0006355//GO:0009889//GO:0006807//GO:0034641//GO:2001141//GO:0090304//GO:0019538//GO:0006725//GO:0019222//GO:2000112//GO:0043170//GO:0018130//GO:1901362//GO:0019438//GO:0010556//GO:0009059//GO:0060255//GO:0009058//GO:0006351//GO:0016070//GO:0097659//GO:0050789//GO:0032774//GO:0071704//GO:1901360//GO:0080090//GO:0006508//GO:0008152//GO:0051171//GO:0044260//GO:…	cellular process//cellular metabolic process//regulation of nucleobase-containing compound metabolic process//regulation of transcription, DNA-templated//regulation of biosynthetic process//nitrogen compound metabolic process//cellular nitrogen compound metabolic process//regulation of RNA biosynthetic process//nucleic acid metabolic process//protein metabolic process//cellular aromatic compound …	--	--	GO:0008236//GO:0008233//GO:0003674//GO:0017171//GO:0070011//GO:0003824//GO:0016787	serine-type peptidase activity//peptidase activity//molecular_function//serine hydrolase activity//peptidase activity, acting on L-amino acid peptides//catalytic activity//hydrolase activity	no KO assigned | (RefSeq) hypothetical protein	http://www.genome.jp/dbget-bin/www_bget?pper:PRUPE_ppa008273mg	PREDICTED: probable carboxylesterase 15
Pav_sc0003072.1_g100.1.mk	Pav_sc0003072.1	1	0	1	14	4	12	0.0491447	0	0.0595809	0.658037	0.234812	0.500394	0.0362419	0.464414	8.89341	0.724384	3.6179	0.0032713	0.018154	UP	GO:0044763//GO:0006955//GO:0007005//GO:0071840//GO:0009653//GO:0009987//GO:0000902//GO:0044767//GO:0044699//GO:0016043//GO:0032989//GO:0002376//GO:0008150//GO:0006996//GO:0032502//GO:0048869//GO:0050896//GO:0048856	single-organism cellular process//immune response//mitochondrion organization//cellular component organization or biogenesis//anatomical structure morphogenesis//cellular process//cell morphogenesis//single-organism developmental process//single-organism process//cellular component organization//cellular component morphogenesis//immune system process//biological_process//organelle organization//d…	GO:0016020//GO:0005575	membrane//cellular_component	GO:0004842//GO:0003824//GO:0016740//GO:0003674//GO:0019787	ubiquitin-protein transferase activity//catalytic activity//transferase activity//molecular_function//ubiquitin-like protein transferase activity	K15688 E3 ubiquitin-protein ligase MUL1 [EC:2.3.2.27] | (RefSeq) hypothetical protein	http://www.genome.jp/dbget-bin/www_bget?pper:PRUPE_ppa008230mg	hypothetical protein LR48_Vigan02g113300
[truncated: 1,096 more rows]
