# Supplementary material for: Transcriptomic analysis reveals insights into the response to Hop stunt viroid (HSVd) in sweet cherry (Prunus avium L.) fruits
Source: PeerJ. 2020 Sep 21;8:e10005. doi: 10.7717/peerj.10005 (PMC7513744; doi:10.7717/peerj.10005)
Supplement: Supplemental Information 3 — BP: Biological Process; CC: Cellular Component; p-value: Statistical significance test index; padj: The corrected p-value. [file peerj-08-10005-s003.xls]

## Sheet: S3
Table S3. GO term enrichment for differentially expressed genes.
Category	GO ID	Description	p-value	padj	geneID	Count	Up	Up_Gene_names	Down	Down_Gene_names
BP	GO:0009733	response to auxin	1.97e-10	5.21e-08	Pav_sc0001105.1_g280.1.mk/Pav_sc0000752.1_g150.1.br/Pav_sc0000129.1_g1670.1.mk/Pav_sc0000752.1_g160.1.br/Pav_sc0005175.1_g050.1.br/Pav_sc0000044.1_g680.1.br/Pav_sc0008108.1_g010.1.mk/Pav_sc0000791.1_g150.1.mk/Pav_sc0000480.1_g730.1.mk/Pav_sc0002056.1_g070.1.br/Pav_sc0001583.1_g270.1.br/Pav_sc0000752.1_g170.1.br/Pav_sc0000752.1_g140.1.br/Pav_sc0002080.1_g160.1.mk/Pav_sc0000555.1_g070.1.mk/Pav_sc00…	16	5	Pav_sc0000044.1_g680.1.br/Pav_sc0002056.1_g070.1.br/Pav_sc0001583.1_g270.1.br/Pav_sc0002080.1_g160.1.mk/Pav_sc0002080.1_g130.1.br	11	Pav_sc0001105.1_g280.1.mk/Pav_sc0000752.1_g150.1.br/Pav_sc0000129.1_g1670.1.mk/Pav_sc0000752.1_g160.1.br/Pav_sc0005175.1_g050.1.br/Pav_sc0008108.1_g010.1.mk/Pav_sc0000791.1_g150.1.mk/Pav_sc0000480.1_g730.1.mk/Pav_sc0000752.1_g170.1.br/Pav_sc0000752.1_g140.1.br/Pav_sc0000555.1_g070.1.mk
BP	GO:0009719	response to endogenous stimulus	1.41e-07	9.35e-06	Pav_sc0001105.1_g280.1.mk/Pav_sc0000752.1_g150.1.br/Pav_sc0000129.1_g1670.1.mk/Pav_sc0000752.1_g160.1.br/Pav_sc0005175.1_g050.1.br/Pav_sc0000044.1_g680.1.br/Pav_sc0008108.1_g010.1.mk/Pav_sc0000791.1_g150.1.mk/Pav_sc0000480.1_g730.1.mk/Pav_sc0002056.1_g070.1.br/Pav_sc0001583.1_g270.1.br/Pav_sc0000752.1_g170.1.br/Pav_sc0000752.1_g140.1.br/Pav_sc0002080.1_g160.1.mk/Pav_sc0000555.1_g070.1.mk/Pav_sc00…	16	5	Pav_sc0000044.1_g680.1.br/Pav_sc0002056.1_g070.1.br/Pav_sc0001583.1_g270.1.br/Pav_sc0002080.1_g160.1.mk/Pav_sc0002080.1_g130.1.br	11	Pav_sc0001105.1_g280.1.mk/Pav_sc0000752.1_g150.1.br/Pav_sc0000129.1_g1670.1.mk/Pav_sc0000752.1_g160.1.br/Pav_sc0005175.1_g050.1.br/Pav_sc0008108.1_g010.1.mk/Pav_sc0000791.1_g150.1.mk/Pav_sc0000480.1_g730.1.mk/Pav_sc0000752.1_g170.1.br/Pav_sc0000752.1_g140.1.br/Pav_sc0000555.1_g070.1.mk
BP	GO:0009725	response to hormone	1.41e-07	9.35e-06	Pav_sc0001105.1_g280.1.mk/Pav_sc0000752.1_g150.1.br/Pav_sc0000129.1_g1670.1.mk/Pav_sc0000752.1_g160.1.br/Pav_sc0005175.1_g050.1.br/Pav_sc0000044.1_g680.1.br/Pav_sc0008108.1_g010.1.mk/Pav_sc0000791.1_g150.1.mk/Pav_sc0000480.1_g730.1.mk/Pav_sc0002056.1_g070.1.br/Pav_sc0001583.1_g270.1.br/Pav_sc0000752.1_g170.1.br/Pav_sc0000752.1_g140.1.br/Pav_sc0002080.1_g160.1.mk/Pav_sc0000555.1_g070.1.mk/Pav_sc00…	16	5	Pav_sc0000044.1_g680.1.br/Pav_sc0002056.1_g070.1.br/Pav_sc0001583.1_g270.1.br/Pav_sc0002080.1_g160.1.mk/Pav_sc0002080.1_g130.1.br	11	Pav_sc0001105.1_g280.1.mk/Pav_sc0000752.1_g150.1.br/Pav_sc0000129.1_g1670.1.mk/Pav_sc0000752.1_g160.1.br/Pav_sc0005175.1_g050.1.br/Pav_sc0008108.1_g010.1.mk/Pav_sc0000791.1_g150.1.mk/Pav_sc0000480.1_g730.1.mk/Pav_sc0000752.1_g170.1.br/Pav_sc0000752.1_g140.1.br/Pav_sc0000555.1_g070.1.mk
BP	GO:0010033	response to organic substance	1.41e-07	9.35e-06	Pav_sc0001105.1_g280.1.mk/Pav_sc0000752.1_g150.1.br/Pav_sc0000129.1_g1670.1.mk/Pav_sc0000752.1_g160.1.br/Pav_sc0005175.1_g050.1.br/Pav_sc0000044.1_g680.1.br/Pav_sc0008108.1_g010.1.mk/Pav_sc0000791.1_g150.1.mk/Pav_sc0000480.1_g730.1.mk/Pav_sc0002056.1_g070.1.br/Pav_sc0001583.1_g270.1.br/Pav_sc0000752.1_g170.1.br/Pav_sc0000752.1_g140.1.br/Pav_sc0002080.1_g160.1.mk/Pav_sc0000555.1_g070.1.mk/Pav_sc00…	16	5	Pav_sc0000044.1_g680.1.br/Pav_sc0002056.1_g070.1.br/Pav_sc0001583.1_g270.1.br/Pav_sc0002080.1_g160.1.mk/Pav_sc0002080.1_g130.1.br	11	Pav_sc0001105.1_g280.1.mk/Pav_sc0000752.1_g150.1.br/Pav_sc0000129.1_g1670.1.mk/Pav_sc0000752.1_g160.1.br/Pav_sc0005175.1_g050.1.br/Pav_sc0008108.1_g010.1.mk/Pav_sc0000791.1_g150.1.mk/Pav_sc0000480.1_g730.1.mk/Pav_sc0000752.1_g170.1.br/Pav_sc0000752.1_g140.1.br/Pav_sc0000555.1_g070.1.mk
BP	GO:0042221	response to chemical	1.34e-05	0.00070836	Pav_sc0001105.1_g280.1.mk/Pav_sc0000752.1_g150.1.br/Pav_sc0000129.1_g1670.1.mk/Pav_sc0000752.1_g160.1.br/Pav_sc0005175.1_g050.1.br/Pav_sc0000493.1_g150.1.mk/Pav_sc0000044.1_g680.1.br/Pav_sc0008108.1_g010.1.mk/Pav_sc0000791.1_g150.1.mk/Pav_sc0000480.1_g730.1.mk/Pav_sc0002056.1_g070.1.br/Pav_sc0001583.1_g270.1.br/Pav_sc0000752.1_g170.1.br/Pav_sc0000752.1_g140.1.br/Pav_sc0000257.1_g490.1.br/Pav_sc00…	19	8	Pav_sc0000493.1_g150.1.mk/Pav_sc0000044.1_g680.1.br/Pav_sc0002056.1_g070.1.br/Pav_sc0001583.1_g270.1.br/Pav_sc0000257.1_g490.1.br/Pav_sc0001073.1_g080.1.mk/Pav_sc0002080.1_g160.1.mk/Pav_sc0002080.1_g130.1.br	11	Pav_sc0001105.1_g280.1.mk/Pav_sc0000752.1_g150.1.br/Pav_sc0000129.1_g1670.1.mk/Pav_sc0000752.1_g160.1.br/Pav_sc0005175.1_g050.1.br/Pav_sc0008108.1_g010.1.mk/Pav_sc0000791.1_g150.1.mk/Pav_sc0000480.1_g730.1.mk/Pav_sc0000752.1_g170.1.br/Pav_sc0000752.1_g140.1.br/Pav_sc0000555.1_g070.1.mk
BP	GO:0051704	multi-organism process	0.000170662	0.00753759	Pav_sc0000791.1_g090.1.mk/Pav_sc0002342.1_g020.1.br/Pav_sc0000396.1_g1070.1.mk/Pav_sc0000615.1_g270.1.br/Pav_sc0001405.1_g1920.1.mk/Pav_sc0002342.1_g060.1.br/Pav_sc0000405.1_g690.1.br/Pav_sc0000095.1_g290.1.br/Pav_sc0000124.1_g100.1.mk/Pav_sc0001932.1_g050.1.mk/Novel00289/Pav_sc0008332.1_g010.1.br/Pav_sc0000095.1_g300.1.br/Pav_sc0000754.1_g540.1.mk	14	6	Pav_sc0001405.1_g1920.1.mk/Pav_sc0000405.1_g690.1.br/Pav_sc0000095.1_g290.1.br/Pav_sc0000124.1_g100.1.mk/Novel00289/Pav_sc0000095.1_g300.1.br	8	Pav_sc0000791.1_g090.1.mk/Pav_sc0002342.1_g020.1.br/Pav_sc0000396.1_g1070.1.mk/Pav_sc0000615.1_g270.1.br/Pav_sc0002342.1_g060.1.br/Pav_sc0001932.1_g050.1.mk/Pav_sc0008332.1_g010.1.br/Pav_sc0000754.1_g540.1.mk
BP	GO:0008037	cell recognition	0.00046332	0.0111618	Pav_sc0000791.1_g090.1.mk/Pav_sc0002342.1_g020.1.br/Pav_sc0000615.1_g270.1.br/Pav_sc0001405.1_g1920.1.mk/Pav_sc0002342.1_g060.1.br/Pav_sc0000405.1_g690.1.br/Pav_sc0000095.1_g290.1.br/Pav_sc0000124.1_g100.1.mk/Pav_sc0001932.1_g050.1.mk/Novel00289/Pav_sc0008332.1_g010.1.br/Pav_sc0000095.1_g300.1.br/Pav_sc0000754.1_g540.1.mk	13	6	Pav_sc0001405.1_g1920.1.mk/Pav_sc0000405.1_g690.1.br/Pav_sc0000095.1_g290.1.br/Pav_sc0000124.1_g100.1.mk/Novel00289/Pav_sc0000095.1_g300.1.br	7	Pav_sc0000791.1_g090.1.mk/Pav_sc0002342.1_g020.1.br/Pav_sc0000615.1_g270.1.br/Pav_sc0002342.1_g060.1.br/Pav_sc0001932.1_g050.1.mk/Pav_sc0008332.1_g010.1.br/Pav_sc0000754.1_g540.1.mk
BP	GO:0009856	pollination	0.00046332	0.0111618	Pav_sc0000791.1_g090.1.mk/Pav_sc0002342.1_g020.1.br/Pav_sc0000615.1_g270.1.br/Pav_sc0001405.1_g1920.1.mk/Pav_sc0002342.1_g060.1.br/Pav_sc0000405.1_g690.1.br/Pav_sc0000095.1_g290.1.br/Pav_sc0000124.1_g100.1.mk/Pav_sc0001932.1_g050.1.mk/Novel00289/Pav_sc0008332.1_g010.1.br/Pav_sc0000095.1_g300.1.br/Pav_sc0000754.1_g540.1.mk	13	6	Pav_sc0001405.1_g1920.1.mk/Pav_sc0000405.1_g690.1.br/Pav_sc0000095.1_g290.1.br/Pav_sc0000124.1_g100.1.mk/Novel00289/Pav_sc0000095.1_g300.1.br	7	Pav_sc0000791.1_g090.1.mk/Pav_sc0002342.1_g020.1.br/Pav_sc0000615.1_g270.1.br/Pav_sc0002342.1_g060.1.br/Pav_sc0001932.1_g050.1.mk/Pav_sc0008332.1_g010.1.br/Pav_sc0000754.1_g540.1.mk
BP	GO:0009875	pollen-pistil interaction	0.00046332	0.0111618	Pav_sc0000791.1_g090.1.mk/Pav_sc0002342.1_g020.1.br/Pav_sc0000615.1_g270.1.br/Pav_sc0001405.1_g1920.1.mk/Pav_sc0002342.1_g060.1.br/Pav_sc0000405.1_g690.1.br/Pav_sc0000095.1_g290.1.br/Pav_sc0000124.1_g100.1.mk/Pav_sc0001932.1_g050.1.mk/Novel00289/Pav_sc0008332.1_g010.1.br/Pav_sc0000095.1_g300.1.br/Pav_sc0000754.1_g540.1.mk	13	6	Pav_sc0001405.1_g1920.1.mk/Pav_sc0000405.1_g690.1.br/Pav_sc0000095.1_g290.1.br/Pav_sc0000124.1_g100.1.mk/Novel00289/Pav_sc0000095.1_g300.1.br	7	Pav_sc0000791.1_g090.1.mk/Pav_sc0002342.1_g020.1.br/Pav_sc0000615.1_g270.1.br/Pav_sc0002342.1_g060.1.br/Pav_sc0001932.1_g050.1.mk/Pav_sc0008332.1_g010.1.br/Pav_sc0000754.1_g540.1.mk
BP	GO:0044706	multi-multicellular organism process	0.00046332	0.0111618	Pav_sc0000791.1_g090.1.mk/Pav_sc0002342.1_g020.1.br/Pav_sc0000615.1_g270.1.br/Pav_sc0001405.1_g1920.1.mk/Pav_sc0002342.1_g060.1.br/Pav_sc0000405.1_g690.1.br/Pav_sc0000095.1_g290.1.br/Pav_sc0000124.1_g100.1.mk/Pav_sc0001932.1_g050.1.mk/Novel00289/Pav_sc0008332.1_g010.1.br/Pav_sc0000095.1_g300.1.br/Pav_sc0000754.1_g540.1.mk	13	6	Pav_sc0001405.1_g1920.1.mk/Pav_sc0000405.1_g690.1.br/Pav_sc0000095.1_g290.1.br/Pav_sc0000124.1_g100.1.mk/Novel00289/Pav_sc0000095.1_g300.1.br	7	Pav_sc0000791.1_g090.1.mk/Pav_sc0002342.1_g020.1.br/Pav_sc0000615.1_g270.1.br/Pav_sc0002342.1_g060.1.br/Pav_sc0001932.1_g050.1.mk/Pav_sc0008332.1_g010.1.br/Pav_sc0000754.1_g540.1.mk
BP	GO:0048544	recognition of pollen	0.00046332	0.0111618	Pav_sc0000791.1_g090.1.mk/Pav_sc0002342.1_g020.1.br/Pav_sc0000615.1_g270.1.br/Pav_sc0001405.1_g1920.1.mk/Pav_sc0002342.1_g060.1.br/Pav_sc0000405.1_g690.1.br/Pav_sc0000095.1_g290.1.br/Pav_sc0000124.1_g100.1.mk/Pav_sc0001932.1_g050.1.mk/Novel00289/Pav_sc0008332.1_g010.1.br/Pav_sc0000095.1_g300.1.br/Pav_sc0000754.1_g540.1.mk	13	6	Pav_sc0001405.1_g1920.1.mk/Pav_sc0000405.1_g690.1.br/Pav_sc0000095.1_g290.1.br/Pav_sc0000124.1_g100.1.mk/Novel00289/Pav_sc0000095.1_g300.1.br	7	Pav_sc0000791.1_g090.1.mk/Pav_sc0002342.1_g020.1.br/Pav_sc0000615.1_g270.1.br/Pav_sc0002342.1_g060.1.br/Pav_sc0001932.1_g050.1.mk/Pav_sc0008332.1_g010.1.br/Pav_sc0000754.1_g540.1.mk
BP	GO:0000003	reproduction	0.000709779	0.0134351	Pav_sc0000791.1_g090.1.mk/Pav_sc0002342.1_g020.1.br/Pav_sc0000615.1_g270.1.br/Pav_sc0001405.1_g1920.1.mk/Pav_sc0002342.1_g060.1.br/Pav_sc0000405.1_g690.1.br/Pav_sc0000095.1_g290.1.br/Pav_sc0000124.1_g100.1.mk/Pav_sc0001932.1_g050.1.mk/Novel00289/Pav_sc0008332.1_g010.1.br/Pav_sc0000095.1_g300.1.br/Pav_sc0000754.1_g540.1.mk	13	6	Pav_sc0001405.1_g1920.1.mk/Pav_sc0000405.1_g690.1.br/Pav_sc0000095.1_g290.1.br/Pav_sc0000124.1_g100.1.mk/Novel00289/Pav_sc0000095.1_g300.1.br	7	Pav_sc0000791.1_g090.1.mk/Pav_sc0002342.1_g020.1.br/Pav_sc0000615.1_g270.1.br/Pav_sc0002342.1_g060.1.br/Pav_sc0001932.1_g050.1.mk/Pav_sc0008332.1_g010.1.br/Pav_sc0000754.1_g540.1.mk
BP	GO:0022414	reproductive process	0.000709779	0.0134351	Pav_sc0000791.1_g090.1.mk/Pav_sc0002342.1_g020.1.br/Pav_sc0000615.1_g270.1.br/Pav_sc0001405.1_g1920.1.mk/Pav_sc0002342.1_g060.1.br/Pav_sc0000405.1_g690.1.br/Pav_sc0000095.1_g290.1.br/Pav_sc0000124.1_g100.1.mk/Pav_sc0001932.1_g050.1.mk/Novel00289/Pav_sc0008332.1_g010.1.br/Pav_sc0000095.1_g300.1.br/Pav_sc0000754.1_g540.1.mk	13	6	Pav_sc0001405.1_g1920.1.mk/Pav_sc0000405.1_g690.1.br/Pav_sc0000095.1_g290.1.br/Pav_sc0000124.1_g100.1.mk/Novel00289/Pav_sc0000095.1_g300.1.br	7	Pav_sc0000791.1_g090.1.mk/Pav_sc0002342.1_g020.1.br/Pav_sc0000615.1_g270.1.br/Pav_sc0002342.1_g060.1.br/Pav_sc0001932.1_g050.1.mk/Pav_sc0008332.1_g010.1.br/Pav_sc0000754.1_g540.1.mk
BP	GO:0044702	single organism reproductive process	0.000709779	0.0134351	Pav_sc0000791.1_g090.1.mk/Pav_sc0002342.1_g020.1.br/Pav_sc0000615.1_g270.1.br/Pav_sc0001405.1_g1920.1.mk/Pav_sc0002342.1_g060.1.br/Pav_sc0000405.1_g690.1.br/Pav_sc0000095.1_g290.1.br/Pav_sc0000124.1_g100.1.mk/Pav_sc0001932.1_g050.1.mk/Novel00289/Pav_sc0008332.1_g010.1.br/Pav_sc0000095.1_g300.1.br/Pav_sc0000754.1_g540.1.mk	13	6	Pav_sc0001405.1_g1920.1.mk/Pav_sc0000405.1_g690.1.br/Pav_sc0000095.1_g290.1.br/Pav_sc0000124.1_g100.1.mk/Novel00289/Pav_sc0000095.1_g300.1.br	7	Pav_sc0000791.1_g090.1.mk/Pav_sc0002342.1_g020.1.br/Pav_sc0000615.1_g270.1.br/Pav_sc0002342.1_g060.1.br/Pav_sc0001932.1_g050.1.mk/Pav_sc0008332.1_g010.1.br/Pav_sc0000754.1_g540.1.mk
BP	GO:0032501	multicellular organismal process	0.00219071	0.0387026	Pav_sc0000791.1_g090.1.mk/Pav_sc0002342.1_g020.1.br/Pav_sc0000615.1_g270.1.br/Pav_sc0001405.1_g1920.1.mk/Pav_sc0002342.1_g060.1.br/Pav_sc0000405.1_g690.1.br/Pav_sc0000095.1_g290.1.br/Pav_sc0000124.1_g100.1.mk/Pav_sc0001932.1_g050.1.mk/Novel00289/Pav_sc0008332.1_g010.1.br/Pav_sc0000095.1_g300.1.br/Pav_sc0000754.1_g540.1.mk	13	6	Pav_sc0001405.1_g1920.1.mk/Pav_sc0000405.1_g690.1.br/Pav_sc0000095.1_g290.1.br/Pav_sc0000124.1_g100.1.mk/Novel00289/Pav_sc0000095.1_g300.1.br	7	Pav_sc0000791.1_g090.1.mk/Pav_sc0002342.1_g020.1.br/Pav_sc0000615.1_g270.1.br/Pav_sc0002342.1_g060.1.br/Pav_sc0001932.1_g050.1.mk/Pav_sc0008332.1_g010.1.br/Pav_sc0000754.1_g540.1.mk
BP	GO:0006979	response to oxidative stress	0.0323969	0.536573	Pav_sc0010253.1_g030.1.mk/Pav_sc0000017.1_g020.1.mk/Pav_sc0001502.1_g290.1.mk/Pav_sc0000099.1_g130.1.mk/Pav_sc0000103.1_g420.1.mk/Pav_sc0001323.1_g1090.1.mk/Pav_co4088935.1_g020.1.mk	7	4	Pav_sc0010253.1_g030.1.mk/Pav_sc0000099.1_g130.1.mk/Pav_sc0001323.1_g1090.1.mk/Pav_co4088935.1_g020.1.mk	3	Pav_sc0000017.1_g020.1.mk/Pav_sc0001502.1_g290.1.mk/Pav_sc0000103.1_g420.1.mk
BP	GO:0007154	cell communication	0.0401255	0.625486	Pav_sc0000791.1_g090.1.mk/Pav_sc0002342.1_g020.1.br/Pav_sc0000983.1_g380.1.mk/Pav_sc0002136.1_g040.1.mk/Pav_sc0001323.1_g340.1.mk/Pav_sc0000615.1_g270.1.br/Pav_sc0000377.1_g370.1.mk/Pav_sc0003183.1_g100.1.mk/Pav_sc0001405.1_g1920.1.mk/Pav_sc0002342.1_g060.1.br/Pav_sc0004298.1_g150.1.mk/Pav_sc0000405.1_g690.1.br/Pav_sc0000095.1_g290.1.br/Pav_sc0003974.1_g100.1.br/Pav_sc0000124.1_g100.1.mk/Pav_sc00…	25	13	Pav_sc0000377.1_g370.1.mk/Pav_sc0001405.1_g1920.1.mk/Pav_sc0004298.1_g150.1.mk/Pav_sc0000405.1_g690.1.br/Pav_sc0000095.1_g290.1.br/Pav_sc0003974.1_g100.1.br/Pav_sc0000124.1_g100.1.mk/Novel00289/Pav_sc0000412.1_g460.1.mk/Novel00502/Pav_sc0004298.1_g070.1.mk/Pav_sc0000412.1_g470.1.br/Pav_sc0000095.1_g300.1.br	12	Pav_sc0000791.1_g090.1.mk/Pav_sc0002342.1_g020.1.br/Pav_sc0000983.1_g380.1.mk/Pav_sc0002136.1_g040.1.mk/Pav_sc0001323.1_g340.1.mk/Pav_sc0000615.1_g270.1.br/Pav_sc0003183.1_g100.1.mk/Pav_sc0002342.1_g060.1.br/Pav_sc0001932.1_g050.1.mk/Pav_sc0002136.1_g060.1.br/Pav_sc0008332.1_g010.1.br/Pav_sc0000754.1_g540.1.mk
BP	GO:0006952	defense response	0.0618478	0.824485	Pav_sc0000221.1_g500.1.mk/Pav_sc0000396.1_g1070.1.mk/Pav_sc0000221.1_g470.1.mk/Pav_sc0003738.1_g090.1.mk/Pav_sc0001196.1_g2240.1.mk/Pav_sc0000221.1_g330.1.mk/Pav_sc0000221.1_g370.1.mk	7	2	Pav_sc0003738.1_g090.1.mk/Pav_sc0001196.1_g2240.1.mk	5	Pav_sc0000221.1_g500.1.mk/Pav_sc0000396.1_g1070.1.mk/Pav_sc0000221.1_g470.1.mk/Pav_sc0000221.1_g330.1.mk/Pav_sc0000221.1_g370.1.mk
BP	GO:0006811	ion transport	0.0622124	0.824485	Pav_sc0000103.1_g980.1.mk/Pav_sc0000554.1_g1910.1.mk/Pav_sc0000174.1_g1380.1.mk/Pav_sc0000111.1_g070.1.mk/Pav_sc0001710.1_g310.1.mk/Pav_sc0000652.1_g1160.1.mk/Pav_sc0001877.1_g040.1.mk/Pav_sc0000591.1_g220.1.mk/Pav_sc0000599.1_g120.1.mk/Pav_sc0000983.1_g630.1.mk/Pav_sc0000848.1_g750.1.mk/Pav_sc0008658.1_g010.1.mk/Pav_sc0001660.1_g010.1.mk/Pav_sc0000497.1_g270.1.mk/Pav_sc0000138.1_g1220.1.mk/Pav_s…	24	21	Pav_sc0000103.1_g980.1.mk/Pav_sc0000174.1_g1380.1.mk/Pav_sc0000111.1_g070.1.mk/Pav_sc0001710.1_g310.1.mk/Pav_sc0000652.1_g1160.1.mk/Pav_sc0001877.1_g040.1.mk/Pav_sc0000591.1_g220.1.mk/Pav_sc0000599.1_g120.1.mk/Pav_sc0000983.1_g630.1.mk/Pav_sc0000848.1_g750.1.mk/Pav_sc0008658.1_g010.1.mk/Pav_sc0001660.1_g010.1.mk/Pav_sc0000497.1_g270.1.mk/Pav_sc0000138.1_g1220.1.mk/Pav_sc0000138.1_g480.1.mk/Pav_sc…	3	Pav_sc0000554.1_g1910.1.mk/Pav_sc0000851.1_g080.1.br/Pav_sc0000480.1_g090.1.mk
BP	GO:0009607	response to biotic stimulus	0.0622253	0.824485	Pav_sc0000221.1_g500.1.mk/Pav_sc0000396.1_g1070.1.mk/Pav_sc0000221.1_g470.1.mk/Pav_sc0000221.1_g330.1.mk/Pav_sc0000221.1_g370.1.mk	5	0		5	Pav_sc0000221.1_g500.1.mk/Pav_sc0000396.1_g1070.1.mk/Pav_sc0000221.1_g470.1.mk/Pav_sc0000221.1_g330.1.mk/Pav_sc0000221.1_g370.1.mk
BP	GO:0071554	cell wall organization or biogenesis	0.150745	0.999998	Pav_sc0001792.1_g090.1.mk/Pav_sc0000130.1_g870.1.mk/Pav_sc0001196.1_g680.1.mk/Pav_sc0005917.1_g050.1.br/Pav_sc0000257.1_g1070.1.mk/Pav_sc0004475.1_g020.1.br	6	2	Pav_sc0001196.1_g680.1.mk/Pav_sc0004475.1_g020.1.br	4	Pav_sc0001792.1_g090.1.mk/Pav_sc0000130.1_g870.1.mk/Pav_sc0005917.1_g050.1.br/Pav_sc0000257.1_g1070.1.mk
BP	GO:0006950	response to stress	0.159476	0.999998	Pav_sc0010253.1_g030.1.mk/Pav_sc0000221.1_g500.1.mk/Pav_sc0000017.1_g020.1.mk/Pav_sc0000112.1_g100.1.mk/Pav_sc0000396.1_g1070.1.mk/Pav_sc0000221.1_g470.1.mk/Pav_sc0000383.1_g180.1.mk/Pav_sc0003738.1_g090.1.mk/Pav_sc0001502.1_g290.1.mk/Pav_sc0001196.1_g2240.1.mk/Pav_sc0009684.1_g010.1.mk/Pav_sc0000736.1_g390.1.mk/Pav_sc0000099.1_g130.1.mk/Pav_sc0000221.1_g330.1.mk/Pav_sc0000103.1_g420.1.mk/Pav_sc0…	19	11	Pav_sc0010253.1_g030.1.mk/Pav_sc0000112.1_g100.1.mk/Pav_sc0000383.1_g180.1.mk/Pav_sc0003738.1_g090.1.mk/Pav_sc0001196.1_g2240.1.mk/Pav_sc0009684.1_g010.1.mk/Pav_sc0000736.1_g390.1.mk/Pav_sc0000099.1_g130.1.mk/Pav_sc0001369.1_g210.1.mk/Pav_sc0001323.1_g1090.1.mk/Pav_co4088935.1_g020.1.mk	8	Pav_sc0000221.1_g500.1.mk/Pav_sc0000017.1_g020.1.mk/Pav_sc0000396.1_g1070.1.mk/Pav_sc0000221.1_g470.1.mk/Pav_sc0001502.1_g290.1.mk/Pav_sc0000221.1_g330.1.mk/Pav_sc0000103.1_g420.1.mk/Pav_sc0000221.1_g370.1.mk
BP	GO:0005985	sucrose metabolic process	0.184487	0.999998	Pav_sc0006188.1_g050.1.mk/Pav_sc0000500.1_g060.1.mk	2	2	Pav_sc0006188.1_g050.1.mk/Pav_sc0000500.1_g060.1.mk	0
BP	GO:0000737	DNA catabolic process, endonucleolytic	0.209067	0.999998	Pav_sc0002270.1_g100.1.mk/Pav_sc0001926.1_g030.1.mk	2	1	Pav_sc0002270.1_g100.1.mk	1	Pav_sc0001926.1_g030.1.mk
BP	GO:0030001	metal ion transport	0.211679	0.999998	Pav_sc0000103.1_g980.1.mk/Pav_sc0000174.1_g1380.1.mk/Pav_sc0000652.1_g1160.1.mk/Pav_sc0000599.1_g120.1.mk/Pav_sc0000848.1_g750.1.mk/Pav_sc0008658.1_g010.1.mk/Pav_sc0000138.1_g480.1.mk/Pav_sc0000030.1_g270.1.mk	8	8	Pav_sc0000103.1_g980.1.mk/Pav_sc0000174.1_g1380.1.mk/Pav_sc0000652.1_g1160.1.mk/Pav_sc0000599.1_g120.1.mk/Pav_sc0000848.1_g750.1.mk/Pav_sc0008658.1_g010.1.mk/Pav_sc0000138.1_g480.1.mk/Pav_sc0000030.1_g270.1.mk	0
BP	GO:0006308	DNA catabolic process	0.233949	0.999998	Pav_sc0002270.1_g100.1.mk/Pav_sc0001926.1_g030.1.mk	2	1	Pav_sc0002270.1_g100.1.mk	1	Pav_sc0001926.1_g030.1.mk
BP	GO:0008272	sulfate transport	0.233949	0.999998	Pav_sc0001710.1_g310.1.mk/Pav_sc0000983.1_g630.1.mk	2	2	Pav_sc0001710.1_g310.1.mk/Pav_sc0000983.1_g630.1.mk	0
BP	GO:0072348	sulfur compound transport	0.233949	0.999998	Pav_sc0001710.1_g310.1.mk/Pav_sc0000983.1_g630.1.mk	2	2	Pav_sc0001710.1_g310.1.mk/Pav_sc0000983.1_g630.1.mk	0
BP	GO:0045229	external encapsulating structure organization	0.238135	0.999998	Pav_sc0000130.1_g870.1.mk/Pav_sc0001196.1_g680.1.mk/Pav_sc0000257.1_g1070.1.mk/Pav_sc0004475.1_g020.1.br	4	2	Pav_sc0001196.1_g680.1.mk/Pav_sc0004475.1_g020.1.br	2	Pav_sc0000130.1_g870.1.mk/Pav_sc0000257.1_g1070.1.mk
BP	GO:0071555	cell wall organization	0.238135	0.999998	Pav_sc0000130.1_g870.1.mk/Pav_sc0001196.1_g680.1.mk/Pav_sc0000257.1_g1070.1.mk/Pav_sc0004475.1_g020.1.br	4	2	Pav_sc0001196.1_g680.1.mk/Pav_sc0004475.1_g020.1.br	2	Pav_sc0000130.1_g870.1.mk/Pav_sc0000257.1_g1070.1.mk
BP	GO:0034655	nucleobase-containing compound catabolic process	0.242497	0.999998	Pav_sc0002270.1_g100.1.mk/Pav_sc0000119.1_g650.1.mk/Pav_sc0001926.1_g030.1.mk	3	2	Pav_sc0002270.1_g100.1.mk/Pav_sc0000119.1_g650.1.mk	1	Pav_sc0001926.1_g030.1.mk
BP	GO:0006812	cation transport	0.245983	0.999998	Pav_sc0000103.1_g980.1.mk/Pav_sc0000554.1_g1910.1.mk/Pav_sc0000174.1_g1380.1.mk/Pav_sc0000652.1_g1160.1.mk/Pav_sc0000599.1_g120.1.mk/Pav_sc0000848.1_g750.1.mk/Pav_sc0008658.1_g010.1.mk/Pav_sc0000497.1_g270.1.mk/Pav_sc0000138.1_g480.1.mk/Pav_sc0000396.1_g040.1.mk/Pav_sc0001709.1_g030.1.mk/Pav_sc0000030.1_g270.1.mk/Pav_sc0002318.1_g420.1.mk	13	12	Pav_sc0000103.1_g980.1.mk/Pav_sc0000174.1_g1380.1.mk/Pav_sc0000652.1_g1160.1.mk/Pav_sc0000599.1_g120.1.mk/Pav_sc0000848.1_g750.1.mk/Pav_sc0008658.1_g010.1.mk/Pav_sc0000497.1_g270.1.mk/Pav_sc0000138.1_g480.1.mk/Pav_sc0000396.1_g040.1.mk/Pav_sc0001709.1_g030.1.mk/Pav_sc0000030.1_g270.1.mk/Pav_sc0002318.1_g420.1.mk	1	Pav_sc0000554.1_g1910.1.mk
BP	GO:0055085	transmembrane transport	0.252532	0.999998	Pav_sc0000622.1_g050.1.br/Pav_sc0000848.1_g990.1.mk/Pav_sc0000103.1_g980.1.mk/Pav_sc0001485.1_g080.1.mk/Pav_sc0000554.1_g1910.1.mk/Pav_sc0000493.1_g150.1.mk/Pav_sc0001742.1_g030.1.br/Pav_sc0004467.1_g120.1.mk/Pav_sc0001412.1_g370.1.mk/Pav_sc0000744.1_g330.1.mk/Pav_sc0001877.1_g040.1.mk/Pav_sc0000591.1_g220.1.mk/Novel00406/Pav_sc0000103.1_g670.1.mk/Pav_sc0004226.1_g050.1.mk/Pav_sc0000497.1_g270.1.…	30	26	Pav_sc0000622.1_g050.1.br/Pav_sc0000848.1_g990.1.mk/Pav_sc0000103.1_g980.1.mk/Pav_sc0001485.1_g080.1.mk/Pav_sc0000493.1_g150.1.mk/Pav_sc0001742.1_g030.1.br/Pav_sc0004467.1_g120.1.mk/Pav_sc0001412.1_g370.1.mk/Pav_sc0000744.1_g330.1.mk/Pav_sc0001877.1_g040.1.mk/Pav_sc0000591.1_g220.1.mk/Novel00406/Pav_sc0000103.1_g670.1.mk/Pav_sc0004226.1_g050.1.mk/Pav_sc0000497.1_g270.1.mk/Pav_sc0000138.1_g1220.1.…	4	Pav_sc0000554.1_g1910.1.mk/Pav_sc0000851.1_g080.1.br/Pav_sc0001392.1_g240.1.mk/Pav_sc0000480.1_g090.1.mk
BP	GO:0006022	aminoglycan metabolic process	0.258988	0.999998	Pav_sc0001792.1_g090.1.mk/Pav_sc0005917.1_g050.1.br	2	0		2	Pav_sc0001792.1_g090.1.mk/Pav_sc0005917.1_g050.1.br
BP	GO:0006026	aminoglycan catabolic process	0.258988	0.999998	Pav_sc0001792.1_g090.1.mk/Pav_sc0005917.1_g050.1.br	2	0		2	Pav_sc0001792.1_g090.1.mk/Pav_sc0005917.1_g050.1.br
BP	GO:0006030	chitin metabolic process	0.258988	0.999998	Pav_sc0001792.1_g090.1.mk/Pav_sc0005917.1_g050.1.br	2	0		2	Pav_sc0001792.1_g090.1.mk/Pav_sc0005917.1_g050.1.br
BP	GO:0006032	chitin catabolic process	0.258988	0.999998	Pav_sc0001792.1_g090.1.mk/Pav_sc0005917.1_g050.1.br	2	0		2	Pav_sc0001792.1_g090.1.mk/Pav_sc0005917.1_g050.1.br
BP	GO:0006040	amino sugar metabolic process	0.258988	0.999998	Pav_sc0001792.1_g090.1.mk/Pav_sc0005917.1_g050.1.br	2	0		2	Pav_sc0001792.1_g090.1.mk/Pav_sc0005917.1_g050.1.br
BP	GO:0016998	cell wall macromolecule catabolic process	0.258988	0.999998	Pav_sc0001792.1_g090.1.mk/Pav_sc0005917.1_g050.1.br	2	0		2	Pav_sc0001792.1_g090.1.mk/Pav_sc0005917.1_g050.1.br
BP	GO:0044036	cell wall macromolecule metabolic process	0.258988	0.999998	Pav_sc0001792.1_g090.1.mk/Pav_sc0005917.1_g050.1.br	2	0		2	Pav_sc0001792.1_g090.1.mk/Pav_sc0005917.1_g050.1.br
BP	GO:0046348	amino sugar catabolic process	0.258988	0.999998	Pav_sc0001792.1_g090.1.mk/Pav_sc0005917.1_g050.1.br	2	0		2	Pav_sc0001792.1_g090.1.mk/Pav_sc0005917.1_g050.1.br
BP	GO:1901071	glucosamine-containing compound metabolic process	0.258988	0.999998	Pav_sc0001792.1_g090.1.mk/Pav_sc0005917.1_g050.1.br	2	0		2	Pav_sc0001792.1_g090.1.mk/Pav_sc0005917.1_g050.1.br
BP	GO:1901072	glucosamine-containing compound catabolic process	0.258988	0.999998	Pav_sc0001792.1_g090.1.mk/Pav_sc0005917.1_g050.1.br	2	0		2	Pav_sc0001792.1_g090.1.mk/Pav_sc0005917.1_g050.1.br
BP	GO:0007017	microtubule-based process	0.265654	0.999998	Pav_sc0000119.1_g720.1.mk/Pav_sc0001846.1_g030.1.mk/Pav_sc0000130.1_g010.1.mk/Pav_sc0002828.1_g430.1.mk/Pav_sc0000780.1_g030.1.mk/Pav_sc0003759.1_g070.1.mk	6	5	Pav_sc0000119.1_g720.1.mk/Pav_sc0001846.1_g030.1.mk/Pav_sc0002828.1_g430.1.mk/Pav_sc0000780.1_g030.1.mk/Pav_sc0003759.1_g070.1.mk	1	Pav_sc0000130.1_g010.1.mk
BP	GO:0090305	nucleic acid phosphodiester bond hydrolysis	0.284054	0.999998	Pav_sc0002270.1_g100.1.mk/Pav_sc0001926.1_g030.1.mk	2	1	Pav_sc0002270.1_g100.1.mk	1	Pav_sc0001926.1_g030.1.mk
BP	GO:0046700	heterocycle catabolic process	0.297242	0.999998	Pav_sc0002270.1_g100.1.mk/Pav_sc0000119.1_g650.1.mk/Pav_sc0001926.1_g030.1.mk	3	2	Pav_sc0002270.1_g100.1.mk/Pav_sc0000119.1_g650.1.mk	1	Pav_sc0001926.1_g030.1.mk
BP	GO:0006631	fatty acid metabolic process	0.315689	0.999998	Pav_sc0002842.1_g150.1.mk/Pav_sc0000174.1_g320.1.mk/Pav_sc0002207.1_g400.1.mk	3	1	Pav_sc0002207.1_g400.1.mk	2	Pav_sc0002842.1_g150.1.mk/Pav_sc0000174.1_g320.1.mk
BP	GO:0044270	cellular nitrogen compound catabolic process	0.315689	0.999998	Pav_sc0002270.1_g100.1.mk/Pav_sc0000119.1_g650.1.mk/Pav_sc0001926.1_g030.1.mk	3	2	Pav_sc0002270.1_g100.1.mk/Pav_sc0000119.1_g650.1.mk	1	Pav_sc0001926.1_g030.1.mk
BP	GO:1901361	organic cyclic compound catabolic process	0.315689	0.999998	Pav_sc0002270.1_g100.1.mk/Pav_sc0000119.1_g650.1.mk/Pav_sc0001926.1_g030.1.mk	3	2	Pav_sc0002270.1_g100.1.mk/Pav_sc0000119.1_g650.1.mk	1	Pav_sc0001926.1_g030.1.mk
BP	GO:0019439	aromatic compound catabolic process	0.334157	0.999998	Pav_sc0002270.1_g100.1.mk/Pav_sc0000119.1_g650.1.mk/Pav_sc0001926.1_g030.1.mk	3	2	Pav_sc0002270.1_g100.1.mk/Pav_sc0000119.1_g650.1.mk	1	Pav_sc0001926.1_g030.1.mk
BP	GO:0032787	monocarboxylic acid metabolic process	0.347745	0.999998	Pav_sc0000659.1_g440.1.mk/Pav_sc0002842.1_g150.1.mk/Pav_sc0000672.1_g120.1.mk/Pav_sc0000174.1_g320.1.mk/Pav_sc0002207.1_g400.1.mk/Pav_sc0000044.1_g840.1.mk	6	2	Pav_sc0002207.1_g400.1.mk/Pav_sc0000044.1_g840.1.mk	4	Pav_sc0000659.1_g440.1.mk/Pav_sc0002842.1_g150.1.mk/Pav_sc0000672.1_g120.1.mk/Pav_sc0000174.1_g320.1.mk
BP	GO:0042545	cell wall modification	0.370989	0.999998	Pav_sc0000130.1_g870.1.mk/Pav_sc0000257.1_g1070.1.mk/Pav_sc0004475.1_g020.1.br	3	1	Pav_sc0004475.1_g020.1.br	2	Pav_sc0000130.1_g870.1.mk/Pav_sc0000257.1_g1070.1.mk
BP	GO:0009116	nucleoside metabolic process	0.382579	0.999998	Pav_sc0007306.1_g010.1.br/Pav_sc0000212.1_g360.1.mk	2	1	Pav_sc0000212.1_g360.1.mk	1	Pav_sc0007306.1_g010.1.br
BP	GO:1901657	glycosyl compound metabolic process	0.382579	0.999998	Pav_sc0007306.1_g010.1.br/Pav_sc0000212.1_g360.1.mk	2	1	Pav_sc0000212.1_g360.1.mk	1	Pav_sc0007306.1_g010.1.br
BP	GO:0044712	single-organism catabolic process	0.386915	0.999998	Pav_sc0000659.1_g440.1.mk/Pav_sc0000672.1_g120.1.mk/Pav_sc0002207.1_g400.1.mk/Pav_sc0000119.1_g650.1.mk/Pav_sc0000044.1_g840.1.mk	5	3	Pav_sc0002207.1_g400.1.mk/Pav_sc0000119.1_g650.1.mk/Pav_sc0000044.1_g840.1.mk	2	Pav_sc0000659.1_g440.1.mk/Pav_sc0000672.1_g120.1.mk
BP	GO:0006355	regulation of transcription, DNA-templated	0.395799	0.999998	Pav_sc0000130.1_g780.1.mk/Pav_sc0001102.1_g230.1.mk/Pav_sc0000254.1_g320.1.mk/Pav_sc0001305.1_g900.1.mk/Pav_sc0001582.1_g320.1.mk/Pav_sc0002318.1_g190.1.mk/Pav_sc0001183.1_g230.1.br/Pav_sc0007634.1_g010.1.mk/Pav_sc0000244.1_g070.1.mk/Pav_sc0001305.1_g030.1.mk/Pav_sc0003614.1_g200.1.mk/Novel00046/Pav_sc0001554.1_g180.1.mk/Pav_sc0004456.1_g020.1.mk/Pav_sc0000780.1_g430.1.mk/Pav_sc0000038.1_g350.1.m…	33	28	Pav_sc0000254.1_g320.1.mk/Pav_sc0001305.1_g900.1.mk/Pav_sc0001582.1_g320.1.mk/Pav_sc0002318.1_g190.1.mk/Pav_sc0007634.1_g010.1.mk/Pav_sc0000244.1_g070.1.mk/Pav_sc0001305.1_g030.1.mk/Novel00046/Pav_sc0001554.1_g180.1.mk/Pav_sc0004456.1_g020.1.mk/Pav_sc0000780.1_g430.1.mk/Pav_sc0000038.1_g350.1.mk/Pav_sc0002136.1_g280.1.mk/Pav_sc0000502.1_g370.1.mk/Pav_sc0000087.1_g590.1.mk/Pav_sc0000554.1_g1250.1.…	5	Pav_sc0000130.1_g780.1.mk/Pav_sc0001102.1_g230.1.mk/Pav_sc0001183.1_g230.1.br/Pav_sc0003614.1_g200.1.mk/Pav_sc0000055.1_g320.1.mk
BP	GO:0051252	regulation of RNA metabolic process	0.395799	0.999998	Pav_sc0000130.1_g780.1.mk/Pav_sc0001102.1_g230.1.mk/Pav_sc0000254.1_g320.1.mk/Pav_sc0001305.1_g900.1.mk/Pav_sc0001582.1_g320.1.mk/Pav_sc0002318.1_g190.1.mk/Pav_sc0001183.1_g230.1.br/Pav_sc0007634.1_g010.1.mk/Pav_sc0000244.1_g070.1.mk/Pav_sc0001305.1_g030.1.mk/Pav_sc0003614.1_g200.1.mk/Novel00046/Pav_sc0001554.1_g180.1.mk/Pav_sc0004456.1_g020.1.mk/Pav_sc0000780.1_g430.1.mk/Pav_sc0000038.1_g350.1.m…	33	28	Pav_sc0000254.1_g320.1.mk/Pav_sc0001305.1_g900.1.mk/Pav_sc0001582.1_g320.1.mk/Pav_sc0002318.1_g190.1.mk/Pav_sc0007634.1_g010.1.mk/Pav_sc0000244.1_g070.1.mk/Pav_sc0001305.1_g030.1.mk/Novel00046/Pav_sc0001554.1_g180.1.mk/Pav_sc0004456.1_g020.1.mk/Pav_sc0000780.1_g430.1.mk/Pav_sc0000038.1_g350.1.mk/Pav_sc0002136.1_g280.1.mk/Pav_sc0000502.1_g370.1.mk/Pav_sc0000087.1_g590.1.mk/Pav_sc0000554.1_g1250.1.…	5	Pav_sc0000130.1_g780.1.mk/Pav_sc0001102.1_g230.1.mk/Pav_sc0001183.1_g230.1.br/Pav_sc0003614.1_g200.1.mk/Pav_sc0000055.1_g320.1.mk
BP	GO:1903506	regulation of nucleic acid-templated transcription	0.395799	0.999998	Pav_sc0000130.1_g780.1.mk/Pav_sc0001102.1_g230.1.mk/Pav_sc0000254.1_g320.1.mk/Pav_sc0001305.1_g900.1.mk/Pav_sc0001582.1_g320.1.mk/Pav_sc0002318.1_g190.1.mk/Pav_sc0001183.1_g230.1.br/Pav_sc0007634.1_g010.1.mk/Pav_sc0000244.1_g070.1.mk/Pav_sc0001305.1_g030.1.mk/Pav_sc0003614.1_g200.1.mk/Novel00046/Pav_sc0001554.1_g180.1.mk/Pav_sc0004456.1_g020.1.mk/Pav_sc0000780.1_g430.1.mk/Pav_sc0000038.1_g350.1.m…	33	28	Pav_sc0000254.1_g320.1.mk/Pav_sc0001305.1_g900.1.mk/Pav_sc0001582.1_g320.1.mk/Pav_sc0002318.1_g190.1.mk/Pav_sc0007634.1_g010.1.mk/Pav_sc0000244.1_g070.1.mk/Pav_sc0001305.1_g030.1.mk/Novel00046/Pav_sc0001554.1_g180.1.mk/Pav_sc0004456.1_g020.1.mk/Pav_sc0000780.1_g430.1.mk/Pav_sc0000038.1_g350.1.mk/Pav_sc0002136.1_g280.1.mk/Pav_sc0000502.1_g370.1.mk/Pav_sc0000087.1_g590.1.mk/Pav_sc0000554.1_g1250.1.…	5	Pav_sc0000130.1_g780.1.mk/Pav_sc0001102.1_g230.1.mk/Pav_sc0001183.1_g230.1.br/Pav_sc0003614.1_g200.1.mk/Pav_sc0000055.1_g320.1.mk
BP	GO:2001141	regulation of RNA biosynthetic process	0.395799	0.999998	Pav_sc0000130.1_g780.1.mk/Pav_sc0001102.1_g230.1.mk/Pav_sc0000254.1_g320.1.mk/Pav_sc0001305.1_g900.1.mk/Pav_sc0001582.1_g320.1.mk/Pav_sc0002318.1_g190.1.mk/Pav_sc0001183.1_g230.1.br/Pav_sc0007634.1_g010.1.mk/Pav_sc0000244.1_g070.1.mk/Pav_sc0001305.1_g030.1.mk/Pav_sc0003614.1_g200.1.mk/Novel00046/Pav_sc0001554.1_g180.1.mk/Pav_sc0004456.1_g020.1.mk/Pav_sc0000780.1_g430.1.mk/Pav_sc0000038.1_g350.1.m…	33	28	Pav_sc0000254.1_g320.1.mk/Pav_sc0001305.1_g900.1.mk/Pav_sc0001582.1_g320.1.mk/Pav_sc0002318.1_g190.1.mk/Pav_sc0007634.1_g010.1.mk/Pav_sc0000244.1_g070.1.mk/Pav_sc0001305.1_g030.1.mk/Novel00046/Pav_sc0001554.1_g180.1.mk/Pav_sc0004456.1_g020.1.mk/Pav_sc0000780.1_g430.1.mk/Pav_sc0000038.1_g350.1.mk/Pav_sc0002136.1_g280.1.mk/Pav_sc0000502.1_g370.1.mk/Pav_sc0000087.1_g590.1.mk/Pav_sc0000554.1_g1250.1.…	5	Pav_sc0000130.1_g780.1.mk/Pav_sc0001102.1_g230.1.mk/Pav_sc0001183.1_g230.1.br/Pav_sc0003614.1_g200.1.mk/Pav_sc0000055.1_g320.1.mk
BP	GO:1901136	carbohydrate derivative catabolic process	0.406381	0.999998	Pav_sc0001792.1_g090.1.mk/Pav_sc0005917.1_g050.1.br	2	0		2	Pav_sc0001792.1_g090.1.mk/Pav_sc0005917.1_g050.1.br
BP	GO:0019219	regulation of nucleobase-containing compound metabolic process	0.4156	0.999998	Pav_sc0000130.1_g780.1.mk/Pav_sc0001102.1_g230.1.mk/Pav_sc0000254.1_g320.1.mk/Pav_sc0001305.1_g900.1.mk/Pav_sc0001582.1_g320.1.mk/Pav_sc0002318.1_g190.1.mk/Pav_sc0001183.1_g230.1.br/Pav_sc0007634.1_g010.1.mk/Pav_sc0000244.1_g070.1.mk/Pav_sc0001305.1_g030.1.mk/Pav_sc0003614.1_g200.1.mk/Novel00046/Pav_sc0001554.1_g180.1.mk/Pav_sc0004456.1_g020.1.mk/Pav_sc0000780.1_g430.1.mk/Pav_sc0000038.1_g350.1.m…	33	28	Pav_sc0000254.1_g320.1.mk/Pav_sc0001305.1_g900.1.mk/Pav_sc0001582.1_g320.1.mk/Pav_sc0002318.1_g190.1.mk/Pav_sc0007634.1_g010.1.mk/Pav_sc0000244.1_g070.1.mk/Pav_sc0001305.1_g030.1.mk/Novel00046/Pav_sc0001554.1_g180.1.mk/Pav_sc0004456.1_g020.1.mk/Pav_sc0000780.1_g430.1.mk/Pav_sc0000038.1_g350.1.mk/Pav_sc0002136.1_g280.1.mk/Pav_sc0000502.1_g370.1.mk/Pav_sc0000087.1_g590.1.mk/Pav_sc0000554.1_g1250.1.…	5	Pav_sc0000130.1_g780.1.mk/Pav_sc0001102.1_g230.1.mk/Pav_sc0001183.1_g230.1.br/Pav_sc0003614.1_g200.1.mk/Pav_sc0000055.1_g320.1.mk
BP	GO:0006928	movement of cell or subcellular component	0.41956	0.999998	Pav_sc0000119.1_g720.1.mk/Pav_sc0000130.1_g010.1.mk/Pav_sc0000780.1_g030.1.mk/Pav_sc0003759.1_g070.1.mk	4	3	Pav_sc0000119.1_g720.1.mk/Pav_sc0000780.1_g030.1.mk/Pav_sc0003759.1_g070.1.mk	1	Pav_sc0000130.1_g010.1.mk
BP	GO:0007018	microtubule-based movement	0.41956	0.999998	Pav_sc0000119.1_g720.1.mk/Pav_sc0000130.1_g010.1.mk/Pav_sc0000780.1_g030.1.mk/Pav_sc0003759.1_g070.1.mk	4	3	Pav_sc0000119.1_g720.1.mk/Pav_sc0000780.1_g030.1.mk/Pav_sc0003759.1_g070.1.mk	1	Pav_sc0000130.1_g010.1.mk
BP	GO:0009889	regulation of biosynthetic process	0.425545	0.999998	Pav_sc0000130.1_g780.1.mk/Pav_sc0001102.1_g230.1.mk/Pav_sc0000254.1_g320.1.mk/Pav_sc0001305.1_g900.1.mk/Pav_sc0001582.1_g320.1.mk/Pav_sc0002318.1_g190.1.mk/Pav_sc0001183.1_g230.1.br/Pav_sc0007634.1_g010.1.mk/Pav_sc0000244.1_g070.1.mk/Pav_sc0001305.1_g030.1.mk/Pav_sc0003614.1_g200.1.mk/Novel00046/Pav_sc0001554.1_g180.1.mk/Pav_sc0004456.1_g020.1.mk/Pav_sc0000780.1_g430.1.mk/Pav_sc0000038.1_g350.1.m…	33	28	Pav_sc0000254.1_g320.1.mk/Pav_sc0001305.1_g900.1.mk/Pav_sc0001582.1_g320.1.mk/Pav_sc0002318.1_g190.1.mk/Pav_sc0007634.1_g010.1.mk/Pav_sc0000244.1_g070.1.mk/Pav_sc0001305.1_g030.1.mk/Novel00046/Pav_sc0001554.1_g180.1.mk/Pav_sc0004456.1_g020.1.mk/Pav_sc0000780.1_g430.1.mk/Pav_sc0000038.1_g350.1.mk/Pav_sc0002136.1_g280.1.mk/Pav_sc0000502.1_g370.1.mk/Pav_sc0000087.1_g590.1.mk/Pav_sc0000554.1_g1250.1.…	5	Pav_sc0000130.1_g780.1.mk/Pav_sc0001102.1_g230.1.mk/Pav_sc0001183.1_g230.1.br/Pav_sc0003614.1_g200.1.mk/Pav_sc0000055.1_g320.1.mk
BP	GO:0010556	regulation of macromolecule biosynthetic process	0.425545	0.999998	Pav_sc0000130.1_g780.1.mk/Pav_sc0001102.1_g230.1.mk/Pav_sc0000254.1_g320.1.mk/Pav_sc0001305.1_g900.1.mk/Pav_sc0001582.1_g320.1.mk/Pav_sc0002318.1_g190.1.mk/Pav_sc0001183.1_g230.1.br/Pav_sc0007634.1_g010.1.mk/Pav_sc0000244.1_g070.1.mk/Pav_sc0001305.1_g030.1.mk/Pav_sc0003614.1_g200.1.mk/Novel00046/Pav_sc0001554.1_g180.1.mk/Pav_sc0004456.1_g020.1.mk/Pav_sc0000780.1_g430.1.mk/Pav_sc0000038.1_g350.1.m…	33	28	Pav_sc0000254.1_g320.1.mk/Pav_sc0001305.1_g900.1.mk/Pav_sc0001582.1_g320.1.mk/Pav_sc0002318.1_g190.1.mk/Pav_sc0007634.1_g010.1.mk/Pav_sc0000244.1_g070.1.mk/Pav_sc0001305.1_g030.1.mk/Novel00046/Pav_sc0001554.1_g180.1.mk/Pav_sc0004456.1_g020.1.mk/Pav_sc0000780.1_g430.1.mk/Pav_sc0000038.1_g350.1.mk/Pav_sc0002136.1_g280.1.mk/Pav_sc0000502.1_g370.1.mk/Pav_sc0000087.1_g590.1.mk/Pav_sc0000554.1_g1250.1.…	5	Pav_sc0000130.1_g780.1.mk/Pav_sc0001102.1_g230.1.mk/Pav_sc0001183.1_g230.1.br/Pav_sc0003614.1_g200.1.mk/Pav_sc0000055.1_g320.1.mk
BP	GO:0031326	regulation of cellular biosynthetic process	0.425545	0.999998	Pav_sc0000130.1_g780.1.mk/Pav_sc0001102.1_g230.1.mk/Pav_sc0000254.1_g320.1.mk/Pav_sc0001305.1_g900.1.mk/Pav_sc0001582.1_g320.1.mk/Pav_sc0002318.1_g190.1.mk/Pav_sc0001183.1_g230.1.br/Pav_sc0007634.1_g010.1.mk/Pav_sc0000244.1_g070.1.mk/Pav_sc0001305.1_g030.1.mk/Pav_sc0003614.1_g200.1.mk/Novel00046/Pav_sc0001554.1_g180.1.mk/Pav_sc0004456.1_g020.1.mk/Pav_sc0000780.1_g430.1.mk/Pav_sc0000038.1_g350.1.m…	33	28	Pav_sc0000254.1_g320.1.mk/Pav_sc0001305.1_g900.1.mk/Pav_sc0001582.1_g320.1.mk/Pav_sc0002318.1_g190.1.mk/Pav_sc0007634.1_g010.1.mk/Pav_sc0000244.1_g070.1.mk/Pav_sc0001305.1_g030.1.mk/Novel00046/Pav_sc0001554.1_g180.1.mk/Pav_sc0004456.1_g020.1.mk/Pav_sc0000780.1_g430.1.mk/Pav_sc0000038.1_g350.1.mk/Pav_sc0002136.1_g280.1.mk/Pav_sc0000502.1_g370.1.mk/Pav_sc0000087.1_g590.1.mk/Pav_sc0000554.1_g1250.1.…	5	Pav_sc0000130.1_g780.1.mk/Pav_sc0001102.1_g230.1.mk/Pav_sc0001183.1_g230.1.br/Pav_sc0003614.1_g200.1.mk/Pav_sc0000055.1_g320.1.mk
BP	GO:2000112	regulation of cellular macromolecule biosynthetic process	0.425545	0.999998	Pav_sc0000130.1_g780.1.mk/Pav_sc0001102.1_g230.1.mk/Pav_sc0000254.1_g320.1.mk/Pav_sc0001305.1_g900.1.mk/Pav_sc0001582.1_g320.1.mk/Pav_sc0002318.1_g190.1.mk/Pav_sc0001183.1_g230.1.br/Pav_sc0007634.1_g010.1.mk/Pav_sc0000244.1_g070.1.mk/Pav_sc0001305.1_g030.1.mk/Pav_sc0003614.1_g200.1.mk/Novel00046/Pav_sc0001554.1_g180.1.mk/Pav_sc0004456.1_g020.1.mk/Pav_sc0000780.1_g430.1.mk/Pav_sc0000038.1_g350.1.m…	33	28	Pav_sc0000254.1_g320.1.mk/Pav_sc0001305.1_g900.1.mk/Pav_sc0001582.1_g320.1.mk/Pav_sc0002318.1_g190.1.mk/Pav_sc0007634.1_g010.1.mk/Pav_sc0000244.1_g070.1.mk/Pav_sc0001305.1_g030.1.mk/Novel00046/Pav_sc0001554.1_g180.1.mk/Pav_sc0004456.1_g020.1.mk/Pav_sc0000780.1_g430.1.mk/Pav_sc0000038.1_g350.1.mk/Pav_sc0002136.1_g280.1.mk/Pav_sc0000502.1_g370.1.mk/Pav_sc0000087.1_g590.1.mk/Pav_sc0000554.1_g1250.1.…	5	Pav_sc0000130.1_g780.1.mk/Pav_sc0001102.1_g230.1.mk/Pav_sc0001183.1_g230.1.br/Pav_sc0003614.1_g200.1.mk/Pav_sc0000055.1_g320.1.mk
BP	GO:0051171	regulation of nitrogen compound metabolic process	0.435512	0.999998	Pav_sc0000130.1_g780.1.mk/Pav_sc0001102.1_g230.1.mk/Pav_sc0000254.1_g320.1.mk/Pav_sc0001305.1_g900.1.mk/Pav_sc0001582.1_g320.1.mk/Pav_sc0002318.1_g190.1.mk/Pav_sc0001183.1_g230.1.br/Pav_sc0007634.1_g010.1.mk/Pav_sc0000244.1_g070.1.mk/Pav_sc0001305.1_g030.1.mk/Pav_sc0003614.1_g200.1.mk/Novel00046/Pav_sc0001554.1_g180.1.mk/Pav_sc0004456.1_g020.1.mk/Pav_sc0000780.1_g430.1.mk/Pav_sc0000038.1_g350.1.m…	33	28	Pav_sc0000254.1_g320.1.mk/Pav_sc0001305.1_g900.1.mk/Pav_sc0001582.1_g320.1.mk/Pav_sc0002318.1_g190.1.mk/Pav_sc0007634.1_g010.1.mk/Pav_sc0000244.1_g070.1.mk/Pav_sc0001305.1_g030.1.mk/Novel00046/Pav_sc0001554.1_g180.1.mk/Pav_sc0004456.1_g020.1.mk/Pav_sc0000780.1_g430.1.mk/Pav_sc0000038.1_g350.1.mk/Pav_sc0002136.1_g280.1.mk/Pav_sc0000502.1_g370.1.mk/Pav_sc0000087.1_g590.1.mk/Pav_sc0000554.1_g1250.1.…	5	Pav_sc0000130.1_g780.1.mk/Pav_sc0001102.1_g230.1.mk/Pav_sc0001183.1_g230.1.br/Pav_sc0003614.1_g200.1.mk/Pav_sc0000055.1_g320.1.mk
BP	GO:0055086	nucleobase-containing small molecule metabolic process	0.437745	0.999998	Pav_sc0000659.1_g440.1.mk/Pav_sc0000419.1_g100.1.mk/Pav_sc0000672.1_g120.1.mk/Pav_sc0000568.1_g560.1.mk/Pav_sc0007306.1_g010.1.br/Pav_sc0000212.1_g360.1.mk/Pav_sc0000119.1_g650.1.mk/Pav_sc0000044.1_g840.1.mk	8	4	Pav_sc0000419.1_g100.1.mk/Pav_sc0000212.1_g360.1.mk/Pav_sc0000119.1_g650.1.mk/Pav_sc0000044.1_g840.1.mk	4	Pav_sc0000659.1_g440.1.mk/Pav_sc0000672.1_g120.1.mk/Pav_sc0000568.1_g560.1.mk/Pav_sc0007306.1_g010.1.br
BP	GO:0006096	glycolytic process	0.443215	0.999998	Pav_sc0000659.1_g440.1.mk/Pav_sc0000672.1_g120.1.mk/Pav_sc0000044.1_g840.1.mk	3	1	Pav_sc0000044.1_g840.1.mk	2	Pav_sc0000659.1_g440.1.mk/Pav_sc0000672.1_g120.1.mk
BP	GO:0006165	nucleoside diphosphate phosphorylation	0.443215	0.999998	Pav_sc0000659.1_g440.1.mk/Pav_sc0000672.1_g120.1.mk/Pav_sc0000044.1_g840.1.mk	3	1	Pav_sc0000044.1_g840.1.mk	2	Pav_sc0000659.1_g440.1.mk/Pav_sc0000672.1_g120.1.mk
BP	GO:0006757	ATP generation from ADP	0.443215	0.999998	Pav_sc0000659.1_g440.1.mk/Pav_sc0000672.1_g120.1.mk/Pav_sc0000044.1_g840.1.mk	3	1	Pav_sc0000044.1_g840.1.mk	2	Pav_sc0000659.1_g440.1.mk/Pav_sc0000672.1_g120.1.mk
BP	GO:0006855	drug transmembrane transport	0.443215	0.999998	Pav_sc0000493.1_g150.1.mk/Pav_sc0000257.1_g490.1.br/Pav_sc0001073.1_g080.1.mk	3	3	Pav_sc0000493.1_g150.1.mk/Pav_sc0000257.1_g490.1.br/Pav_sc0001073.1_g080.1.mk	0
BP	GO:0009132	nucleoside diphosphate metabolic process	0.443215	0.999998	Pav_sc0000659.1_g440.1.mk/Pav_sc0000672.1_g120.1.mk/Pav_sc0000044.1_g840.1.mk	3	1	Pav_sc0000044.1_g840.1.mk	2	Pav_sc0000659.1_g440.1.mk/Pav_sc0000672.1_g120.1.mk
BP	GO:0009135	purine nucleoside diphosphate metabolic process	0.443215	0.999998	Pav_sc0000659.1_g440.1.mk/Pav_sc0000672.1_g120.1.mk/Pav_sc0000044.1_g840.1.mk	3	1	Pav_sc0000044.1_g840.1.mk	2	Pav_sc0000659.1_g440.1.mk/Pav_sc0000672.1_g120.1.mk
BP	GO:0009179	purine ribonucleoside diphosphate metabolic process	0.443215	0.999998	Pav_sc0000659.1_g440.1.mk/Pav_sc0000672.1_g120.1.mk/Pav_sc0000044.1_g840.1.mk	3	1	Pav_sc0000044.1_g840.1.mk	2	Pav_sc0000659.1_g440.1.mk/Pav_sc0000672.1_g120.1.mk
BP	GO:0009185	ribonucleoside diphosphate metabolic process	0.443215	0.999998	Pav_sc0000659.1_g440.1.mk/Pav_sc0000672.1_g120.1.mk/Pav_sc0000044.1_g840.1.mk	3	1	Pav_sc0000044.1_g840.1.mk	2	Pav_sc0000659.1_g440.1.mk/Pav_sc0000672.1_g120.1.mk
BP	GO:0015893	drug transport	0.443215	0.999998	Pav_sc0000493.1_g150.1.mk/Pav_sc0000257.1_g490.1.br/Pav_sc0001073.1_g080.1.mk	3	3	Pav_sc0000493.1_g150.1.mk/Pav_sc0000257.1_g490.1.br/Pav_sc0001073.1_g080.1.mk	0
BP	GO:0042493	response to drug	0.443215	0.999998	Pav_sc0000493.1_g150.1.mk/Pav_sc0000257.1_g490.1.br/Pav_sc0001073.1_g080.1.mk	3	3	Pav_sc0000493.1_g150.1.mk/Pav_sc0000257.1_g490.1.br/Pav_sc0001073.1_g080.1.mk	0
BP	GO:0046031	ADP metabolic process	0.443215	0.999998	Pav_sc0000659.1_g440.1.mk/Pav_sc0000672.1_g120.1.mk/Pav_sc0000044.1_g840.1.mk	3	1	Pav_sc0000044.1_g840.1.mk	2	Pav_sc0000659.1_g440.1.mk/Pav_sc0000672.1_g120.1.mk
BP	GO:0046939	nucleotide phosphorylation	0.443215	0.999998	Pav_sc0000659.1_g440.1.mk/Pav_sc0000672.1_g120.1.mk/Pav_sc0000044.1_g840.1.mk	3	1	Pav_sc0000044.1_g840.1.mk	2	Pav_sc0000659.1_g440.1.mk/Pav_sc0000672.1_g120.1.mk
BP	GO:0006090	pyruvate metabolic process	0.460794	0.999998	Pav_sc0000659.1_g440.1.mk/Pav_sc0000672.1_g120.1.mk/Pav_sc0000044.1_g840.1.mk	3	1	Pav_sc0000044.1_g840.1.mk	2	Pav_sc0000659.1_g440.1.mk/Pav_sc0000672.1_g120.1.mk
BP	GO:0031323	regulation of cellular metabolic process	0.475465	0.999998	Pav_sc0000130.1_g780.1.mk/Pav_sc0001102.1_g230.1.mk/Pav_sc0000254.1_g320.1.mk/Pav_sc0001305.1_g900.1.mk/Pav_sc0001582.1_g320.1.mk/Pav_sc0002318.1_g190.1.mk/Pav_sc0001183.1_g230.1.br/Pav_sc0007634.1_g010.1.mk/Pav_sc0000244.1_g070.1.mk/Pav_sc0001305.1_g030.1.mk/Pav_sc0003614.1_g200.1.mk/Novel00046/Pav_sc0001554.1_g180.1.mk/Pav_sc0004456.1_g020.1.mk/Pav_sc0000780.1_g430.1.mk/Pav_sc0000038.1_g350.1.m…	33	28	Pav_sc0000254.1_g320.1.mk/Pav_sc0001305.1_g900.1.mk/Pav_sc0001582.1_g320.1.mk/Pav_sc0002318.1_g190.1.mk/Pav_sc0007634.1_g010.1.mk/Pav_sc0000244.1_g070.1.mk/Pav_sc0001305.1_g030.1.mk/Novel00046/Pav_sc0001554.1_g180.1.mk/Pav_sc0004456.1_g020.1.mk/Pav_sc0000780.1_g430.1.mk/Pav_sc0000038.1_g350.1.mk/Pav_sc0002136.1_g280.1.mk/Pav_sc0000502.1_g370.1.mk/Pav_sc0000087.1_g590.1.mk/Pav_sc0000554.1_g1250.1.…	5	Pav_sc0000130.1_g780.1.mk/Pav_sc0001102.1_g230.1.mk/Pav_sc0001183.1_g230.1.br/Pav_sc0003614.1_g200.1.mk/Pav_sc0000055.1_g320.1.mk
BP	GO:0080090	regulation of primary metabolic process	0.475465	0.999998	Pav_sc0000130.1_g780.1.mk/Pav_sc0001102.1_g230.1.mk/Pav_sc0000254.1_g320.1.mk/Pav_sc0001305.1_g900.1.mk/Pav_sc0001582.1_g320.1.mk/Pav_sc0002318.1_g190.1.mk/Pav_sc0001183.1_g230.1.br/Pav_sc0007634.1_g010.1.mk/Pav_sc0000244.1_g070.1.mk/Pav_sc0001305.1_g030.1.mk/Pav_sc0003614.1_g200.1.mk/Novel00046/Pav_sc0001554.1_g180.1.mk/Pav_sc0004456.1_g020.1.mk/Pav_sc0000780.1_g430.1.mk/Pav_sc0000038.1_g350.1.m…	33	28	Pav_sc0000254.1_g320.1.mk/Pav_sc0001305.1_g900.1.mk/Pav_sc0001582.1_g320.1.mk/Pav_sc0002318.1_g190.1.mk/Pav_sc0007634.1_g010.1.mk/Pav_sc0000244.1_g070.1.mk/Pav_sc0001305.1_g030.1.mk/Novel00046/Pav_sc0001554.1_g180.1.mk/Pav_sc0004456.1_g020.1.mk/Pav_sc0000780.1_g430.1.mk/Pav_sc0000038.1_g350.1.mk/Pav_sc0002136.1_g280.1.mk/Pav_sc0000502.1_g370.1.mk/Pav_sc0000087.1_g590.1.mk/Pav_sc0000554.1_g1250.1.…	5	Pav_sc0000130.1_g780.1.mk/Pav_sc0001102.1_g230.1.mk/Pav_sc0001183.1_g230.1.br/Pav_sc0003614.1_g200.1.mk/Pav_sc0000055.1_g320.1.mk
BP	GO:0010468	regulation of gene expression	0.485444	0.999998	Pav_sc0000130.1_g780.1.mk/Pav_sc0001102.1_g230.1.mk/Pav_sc0000254.1_g320.1.mk/Pav_sc0001305.1_g900.1.mk/Pav_sc0001582.1_g320.1.mk/Pav_sc0002318.1_g190.1.mk/Pav_sc0001183.1_g230.1.br/Pav_sc0007634.1_g010.1.mk/Pav_sc0000244.1_g070.1.mk/Pav_sc0001305.1_g030.1.mk/Pav_sc0003614.1_g200.1.mk/Novel00046/Pav_sc0001554.1_g180.1.mk/Pav_sc0004456.1_g020.1.mk/Pav_sc0000780.1_g430.1.mk/Pav_sc0000038.1_g350.1.m…	33	28	Pav_sc0000254.1_g320.1.mk/Pav_sc0001305.1_g900.1.mk/Pav_sc0001582.1_g320.1.mk/Pav_sc0002318.1_g190.1.mk/Pav_sc0007634.1_g010.1.mk/Pav_sc0000244.1_g070.1.mk/Pav_sc0001305.1_g030.1.mk/Novel00046/Pav_sc0001554.1_g180.1.mk/Pav_sc0004456.1_g020.1.mk/Pav_sc0000780.1_g430.1.mk/Pav_sc0000038.1_g350.1.mk/Pav_sc0002136.1_g280.1.mk/Pav_sc0000502.1_g370.1.mk/Pav_sc0000087.1_g590.1.mk/Pav_sc0000554.1_g1250.1.…	5	Pav_sc0000130.1_g780.1.mk/Pav_sc0001102.1_g230.1.mk/Pav_sc0001183.1_g230.1.br/Pav_sc0003614.1_g200.1.mk/Pav_sc0000055.1_g320.1.mk
BP	GO:0006066	alcohol metabolic process	0.493864	0.999998	Pav_sc0007703.1_g010.1.mk	1	1	Pav_sc0007703.1_g010.1.mk	0
BP	GO:0019751	polyol metabolic process	0.493864	0.999998	Pav_sc0007703.1_g010.1.mk	1	1	Pav_sc0007703.1_g010.1.mk	0
BP	GO:0072527	pyrimidine-containing compound metabolic process	0.493864	0.999998	Pav_sc0000419.1_g100.1.mk	1	1	Pav_sc0000419.1_g100.1.mk	0
BP	GO:0044724	single-organism carbohydrate catabolic process	0.511992	0.999998	Pav_sc0000659.1_g440.1.mk/Pav_sc0000672.1_g120.1.mk/Pav_sc0000044.1_g840.1.mk	3	1	Pav_sc0000044.1_g840.1.mk	2	Pav_sc0000659.1_g440.1.mk/Pav_sc0000672.1_g120.1.mk
BP	GO:0006820	anion transport	0.51743	0.999998	Pav_sc0000111.1_g070.1.mk/Pav_sc0001710.1_g310.1.mk/Pav_sc0001877.1_g040.1.mk/Pav_sc0000983.1_g630.1.mk/Pav_sc0001660.1_g010.1.mk	5	5	Pav_sc0000111.1_g070.1.mk/Pav_sc0001710.1_g310.1.mk/Pav_sc0001877.1_g040.1.mk/Pav_sc0000983.1_g630.1.mk/Pav_sc0001660.1_g010.1.mk	0
BP	GO:0006694	steroid biosynthetic process	0.527214	0.999998	Novel00069	1	1	Novel00069	0
BP	GO:0022411	cellular component disassembly	0.527214	0.999998	Pav_sc0000543.1_g560.1.br	1	1	Pav_sc0000543.1_g560.1.br	0
BP	GO:0032984	macromolecular complex disassembly	0.527214	0.999998	Pav_sc0000543.1_g560.1.br	1	1	Pav_sc0000543.1_g560.1.br	0
BP	GO:0043241	protein complex disassembly	0.527214	0.999998	Pav_sc0000543.1_g560.1.br	1	1	Pav_sc0000543.1_g560.1.br	0
BP	GO:0043624	cellular protein complex disassembly	0.527214	0.999998	Pav_sc0000543.1_g560.1.br	1	1	Pav_sc0000543.1_g560.1.br	0
BP	GO:0009141	nucleoside triphosphate metabolic process	0.536054	0.999998	Pav_sc0000659.1_g440.1.mk/Pav_sc0000672.1_g120.1.mk/Pav_sc0000119.1_g650.1.mk/Pav_sc0000044.1_g840.1.mk	4	2	Pav_sc0000119.1_g650.1.mk/Pav_sc0000044.1_g840.1.mk	2	Pav_sc0000659.1_g440.1.mk/Pav_sc0000672.1_g120.1.mk
BP	GO:0071822	protein complex subunit organization	0.54466	0.999998	Pav_sc0011838.1_g010.1.mk/Pav_sc0000543.1_g560.1.br/Pav_co4014565.1_g010.1.mk	3	2	Pav_sc0000543.1_g560.1.br/Pav_co4014565.1_g010.1.mk	1	Pav_sc0011838.1_g010.1.mk
BP	GO:0006284	base-excision repair	0.55837	0.999998	Pav_sc0000736.1_g390.1.mk	1	1	Pav_sc0000736.1_g390.1.mk	0
BP	GO:0007186	G-protein coupled receptor signaling pathway	0.55837	0.999998	Pav_sc0000983.1_g380.1.mk	1	0		1	Pav_sc0000983.1_g380.1.mk
BP	GO:0005984	disaccharide metabolic process	0.558406	0.999998	Pav_sc0006188.1_g050.1.mk/Pav_sc0000500.1_g060.1.mk	2	2	Pav_sc0006188.1_g050.1.mk/Pav_sc0000500.1_g060.1.mk	0
BP	GO:0015698	inorganic anion transport	0.577752	0.999998	Pav_sc0001710.1_g310.1.mk/Pav_sc0000983.1_g630.1.mk	2	2	Pav_sc0001710.1_g310.1.mk/Pav_sc0000983.1_g630.1.mk	0
BP	GO:0008202	steroid metabolic process	0.587479	0.999998	Novel00069	1	1	Novel00069	0
BP	GO:0015988	energy coupled proton transmembrane transport, against electrochemical gradient	0.587479	0.999998	Pav_sc0002318.1_g420.1.mk	1	1	Pav_sc0002318.1_g420.1.mk	0
BP	GO:0015991	ATP hydrolysis coupled proton transport	0.587479	0.999998	Pav_sc0002318.1_g420.1.mk	1	1	Pav_sc0002318.1_g420.1.mk	0
BP	GO:0044282	small molecule catabolic process	0.587479	0.999998	Pav_sc0002207.1_g400.1.mk	1	1	Pav_sc0002207.1_g400.1.mk	0
BP	GO:0090662	ATP hydrolysis coupled transmembrane transport	0.587479	0.999998	Pav_sc0002318.1_g420.1.mk	1	1	Pav_sc0002318.1_g420.1.mk	0
BP	GO:0099131	ATP hydrolysis coupled ion transmembrane transport	0.587479	0.999998	Pav_sc0002318.1_g420.1.mk	1	1	Pav_sc0002318.1_g420.1.mk	0
BP	GO:0099132	ATP hydrolysis coupled cation transmembrane transport	0.587479	0.999998	Pav_sc0002318.1_g420.1.mk	1	1	Pav_sc0002318.1_g420.1.mk	0
BP	GO:1901615	organic hydroxy compound metabolic process	0.587479	0.999998	Pav_sc0007703.1_g010.1.mk	1	1	Pav_sc0007703.1_g010.1.mk	0
BP	GO:1901565	organonitrogen compound catabolic process	0.59647	0.999998	Pav_sc0001792.1_g090.1.mk/Pav_sc0005917.1_g050.1.br	2	0		2	Pav_sc0001792.1_g090.1.mk/Pav_sc0005917.1_g050.1.br
BP	GO:0006753	nucleoside phosphate metabolic process	0.601499	0.999998	Pav_sc0000659.1_g440.1.mk/Pav_sc0000419.1_g100.1.mk/Pav_sc0000672.1_g120.1.mk/Pav_sc0000568.1_g560.1.mk/Pav_sc0000119.1_g650.1.mk/Pav_sc0000044.1_g840.1.mk	6	3	Pav_sc0000419.1_g100.1.mk/Pav_sc0000119.1_g650.1.mk/Pav_sc0000044.1_g840.1.mk	3	Pav_sc0000659.1_g440.1.mk/Pav_sc0000672.1_g120.1.mk/Pav_sc0000568.1_g560.1.mk
BP	GO:0019362	pyridine nucleotide metabolic process	0.620459	0.999998	Pav_sc0000659.1_g440.1.mk/Pav_sc0000672.1_g120.1.mk/Pav_sc0000044.1_g840.1.mk	3	1	Pav_sc0000044.1_g840.1.mk	2	Pav_sc0000659.1_g440.1.mk/Pav_sc0000672.1_g120.1.mk
BP	GO:0046496	nicotinamide nucleotide metabolic process	0.620459	0.999998	Pav_sc0000659.1_g440.1.mk/Pav_sc0000672.1_g120.1.mk/Pav_sc0000044.1_g840.1.mk	3	1	Pav_sc0000044.1_g840.1.mk	2	Pav_sc0000659.1_g440.1.mk/Pav_sc0000672.1_g120.1.mk
BP	GO:0006259	DNA metabolic process	0.621574	0.999998	Novel00521/Pav_sc0000013.1_g050.1.mk/Pav_sc0000103.1_g1380.1.mk/Novel00756/Pav_sc0009684.1_g010.1.mk/Novel00288/Pav_sc0002270.1_g100.1.mk/Pav_sc0000736.1_g390.1.mk/Pav_sc0001926.1_g030.1.mk	9	8	Novel00521/Pav_sc0000013.1_g050.1.mk/Pav_sc0000103.1_g1380.1.mk/Novel00756/Pav_sc0009684.1_g010.1.mk/Novel00288/Pav_sc0002270.1_g100.1.mk/Pav_sc0000736.1_g390.1.mk	1	Pav_sc0001926.1_g030.1.mk
BP	GO:0009311	oligosaccharide metabolic process	0.632025	0.999998	Pav_sc0006188.1_g050.1.mk/Pav_sc0000500.1_g060.1.mk	2	2	Pav_sc0006188.1_g050.1.mk/Pav_sc0000500.1_g060.1.mk	0
BP	GO:0006733	oxidoreduction coenzyme metabolic process	0.634549	0.999998	Pav_sc0000659.1_g440.1.mk/Pav_sc0000672.1_g120.1.mk/Pav_sc0000044.1_g840.1.mk	3	1	Pav_sc0000044.1_g840.1.mk	2	Pav_sc0000659.1_g440.1.mk/Pav_sc0000672.1_g120.1.mk
BP	GO:0072524	pyridine-containing compound metabolic process	0.634549	0.999998	Pav_sc0000659.1_g440.1.mk/Pav_sc0000672.1_g120.1.mk/Pav_sc0000044.1_g840.1.mk	3	1	Pav_sc0000044.1_g840.1.mk	2	Pav_sc0000659.1_g440.1.mk/Pav_sc0000672.1_g120.1.mk
BP	GO:0007165	signal transduction	0.638709	0.999998	Pav_sc0000983.1_g380.1.mk/Pav_sc0002136.1_g040.1.mk/Pav_sc0001323.1_g340.1.mk/Pav_sc0000377.1_g370.1.mk/Pav_sc0003183.1_g100.1.mk/Pav_sc0004298.1_g150.1.mk/Pav_sc0003974.1_g100.1.br/Pav_sc0000412.1_g460.1.mk/Novel00502/Pav_sc0004298.1_g070.1.mk/Pav_sc0000412.1_g470.1.br/Pav_sc0002136.1_g060.1.br	12	7	Pav_sc0000377.1_g370.1.mk/Pav_sc0004298.1_g150.1.mk/Pav_sc0003974.1_g100.1.br/Pav_sc0000412.1_g460.1.mk/Novel00502/Pav_sc0004298.1_g070.1.mk/Pav_sc0000412.1_g470.1.br	5	Pav_sc0000983.1_g380.1.mk/Pav_sc0002136.1_g040.1.mk/Pav_sc0001323.1_g340.1.mk/Pav_sc0003183.1_g100.1.mk/Pav_sc0002136.1_g060.1.br
BP	GO:0023052	signaling	0.638709	0.999998	Pav_sc0000983.1_g380.1.mk/Pav_sc0002136.1_g040.1.mk/Pav_sc0001323.1_g340.1.mk/Pav_sc0000377.1_g370.1.mk/Pav_sc0003183.1_g100.1.mk/Pav_sc0004298.1_g150.1.mk/Pav_sc0003974.1_g100.1.br/Pav_sc0000412.1_g460.1.mk/Novel00502/Pav_sc0004298.1_g070.1.mk/Pav_sc0000412.1_g470.1.br/Pav_sc0002136.1_g060.1.br	12	7	Pav_sc0000377.1_g370.1.mk/Pav_sc0004298.1_g150.1.mk/Pav_sc0003974.1_g100.1.br/Pav_sc0000412.1_g460.1.mk/Novel00502/Pav_sc0004298.1_g070.1.mk/Pav_sc0000412.1_g470.1.br	5	Pav_sc0000983.1_g380.1.mk/Pav_sc0002136.1_g040.1.mk/Pav_sc0001323.1_g340.1.mk/Pav_sc0003183.1_g100.1.mk/Pav_sc0002136.1_g060.1.br
BP	GO:0044700	single organism signaling	0.638709	0.999998	Pav_sc0000983.1_g380.1.mk/Pav_sc0002136.1_g040.1.mk/Pav_sc0001323.1_g340.1.mk/Pav_sc0000377.1_g370.1.mk/Pav_sc0003183.1_g100.1.mk/Pav_sc0004298.1_g150.1.mk/Pav_sc0003974.1_g100.1.br/Pav_sc0000412.1_g460.1.mk/Novel00502/Pav_sc0004298.1_g070.1.mk/Pav_sc0000412.1_g470.1.br/Pav_sc0002136.1_g060.1.br	12	7	Pav_sc0000377.1_g370.1.mk/Pav_sc0004298.1_g150.1.mk/Pav_sc0003974.1_g100.1.br/Pav_sc0000412.1_g460.1.mk/Novel00502/Pav_sc0004298.1_g070.1.mk/Pav_sc0000412.1_g470.1.br	5	Pav_sc0000983.1_g380.1.mk/Pav_sc0002136.1_g040.1.mk/Pav_sc0001323.1_g340.1.mk/Pav_sc0003183.1_g100.1.mk/Pav_sc0002136.1_g060.1.br
BP	GO:0006298	mismatch repair	0.64008	0.999998	Pav_sc0009684.1_g010.1.mk	1	1	Pav_sc0009684.1_g010.1.mk	0
BP	GO:0016052	carbohydrate catabolic process	0.648272	0.999998	Pav_sc0000659.1_g440.1.mk/Pav_sc0000672.1_g120.1.mk/Pav_sc0000044.1_g840.1.mk	3	1	Pav_sc0000044.1_g840.1.mk	2	Pav_sc0000659.1_g440.1.mk/Pav_sc0000672.1_g120.1.mk
BP	GO:0006720	isoprenoid metabolic process	0.663815	0.999998	Pav_sc0006660.1_g020.1.mk	1	1	Pav_sc0006660.1_g020.1.mk	0
BP	GO:0008299	isoprenoid biosynthetic process	0.663815	0.999998	Pav_sc0006660.1_g020.1.mk	1	1	Pav_sc0006660.1_g020.1.mk	0
BP	GO:0030258	lipid modification	0.663815	0.999998	Pav_sc0002207.1_g400.1.mk	1	1	Pav_sc0002207.1_g400.1.mk	0
BP	GO:0006461	protein complex assembly	0.66509	0.999998	Pav_sc0011838.1_g010.1.mk/Pav_co4014565.1_g010.1.mk	2	1	Pav_co4014565.1_g010.1.mk	1	Pav_sc0011838.1_g010.1.mk
BP	GO:0070271	protein complex biogenesis	0.66509	0.999998	Pav_sc0011838.1_g010.1.mk/Pav_co4014565.1_g010.1.mk	2	1	Pav_co4014565.1_g010.1.mk	1	Pav_sc0011838.1_g010.1.mk
BP	GO:0016567	protein ubiquitination	0.674609	0.999998	Pav_sc0000040.1_g1010.1.mk/Pav_sc0001364.1_g030.1.mk/Pav_sc0003072.1_g100.1.mk	3	3	Pav_sc0000040.1_g1010.1.mk/Pav_sc0001364.1_g030.1.mk/Pav_sc0003072.1_g100.1.mk	0
BP	GO:0032446	protein modification by small protein conjugation	0.674609	0.999998	Pav_sc0000040.1_g1010.1.mk/Pav_sc0001364.1_g030.1.mk/Pav_sc0003072.1_g100.1.mk	3	3	Pav_sc0000040.1_g1010.1.mk/Pav_sc0001364.1_g030.1.mk/Pav_sc0003072.1_g100.1.mk	0
BP	GO:0009165	nucleotide biosynthetic process	0.680706	0.999998	Pav_sc0000419.1_g100.1.mk/Pav_sc0000568.1_g560.1.mk	2	1	Pav_sc0000419.1_g100.1.mk	1	Pav_sc0000568.1_g560.1.mk
BP	GO:1901293	nucleoside phosphate biosynthetic process	0.680706	0.999998	Pav_sc0000419.1_g100.1.mk/Pav_sc0000568.1_g560.1.mk	2	1	Pav_sc0000419.1_g100.1.mk	1	Pav_sc0000568.1_g560.1.mk
BP	GO:0071804	cellular potassium ion transport	0.685988	0.999998	Pav_sc0000103.1_g980.1.mk	1	1	Pav_sc0000103.1_g980.1.mk	0
BP	GO:0071805	potassium ion transmembrane transport	0.685988	0.999998	Pav_sc0000103.1_g980.1.mk	1	1	Pav_sc0000103.1_g980.1.mk	0
BP	GO:0046034	ATP metabolic process	0.687223	0.999998	Pav_sc0000659.1_g440.1.mk/Pav_sc0000672.1_g120.1.mk/Pav_sc0000044.1_g840.1.mk	3	1	Pav_sc0000044.1_g840.1.mk	2	Pav_sc0000659.1_g440.1.mk/Pav_sc0000672.1_g120.1.mk
BP	GO:0006163	purine nucleotide metabolic process	0.696231	0.999998	Pav_sc0000659.1_g440.1.mk/Pav_sc0000672.1_g120.1.mk/Pav_sc0000568.1_g560.1.mk/Pav_sc0000044.1_g840.1.mk	4	1	Pav_sc0000044.1_g840.1.mk	3	Pav_sc0000659.1_g440.1.mk/Pav_sc0000672.1_g120.1.mk/Pav_sc0000568.1_g560.1.mk
BP	GO:0009144	purine nucleoside triphosphate metabolic process	0.699468	0.999998	Pav_sc0000659.1_g440.1.mk/Pav_sc0000672.1_g120.1.mk/Pav_sc0000044.1_g840.1.mk	3	1	Pav_sc0000044.1_g840.1.mk	2	Pav_sc0000659.1_g440.1.mk/Pav_sc0000672.1_g120.1.mk
BP	GO:0009199	ribonucleoside triphosphate metabolic process	0.699468	0.999998	Pav_sc0000659.1_g440.1.mk/Pav_sc0000672.1_g120.1.mk/Pav_sc0000044.1_g840.1.mk	3	1	Pav_sc0000044.1_g840.1.mk	2	Pav_sc0000659.1_g440.1.mk/Pav_sc0000672.1_g120.1.mk
BP	GO:0009205	purine ribonucleoside triphosphate metabolic process	0.699468	0.999998	Pav_sc0000659.1_g440.1.mk/Pav_sc0000672.1_g120.1.mk/Pav_sc0000044.1_g840.1.mk	3	1	Pav_sc0000044.1_g840.1.mk	2	Pav_sc0000659.1_g440.1.mk/Pav_sc0000672.1_g120.1.mk
BP	GO:0006633	fatty acid biosynthetic process	0.706703	0.999998	Pav_sc0000174.1_g320.1.mk	1	0		1	Pav_sc0000174.1_g320.1.mk
BP	GO:0072521	purine-containing compound metabolic process	0.706749	0.999998	Pav_sc0000659.1_g440.1.mk/Pav_sc0000672.1_g120.1.mk/Pav_sc0000568.1_g560.1.mk/Pav_sc0000044.1_g840.1.mk	4	1	Pav_sc0000044.1_g840.1.mk	3	Pav_sc0000659.1_g440.1.mk/Pav_sc0000672.1_g120.1.mk/Pav_sc0000568.1_g560.1.mk
BP	GO:0044248	cellular catabolic process	0.708688	0.999998	Pav_sc0001792.1_g090.1.mk/Pav_sc0006892.1_g060.1.mk/Pav_sc0005917.1_g050.1.br/Pav_sc0002270.1_g100.1.mk/Pav_sc0002207.1_g400.1.mk/Pav_sc0000119.1_g650.1.mk/Pav_sc0001926.1_g030.1.mk	7	4	Pav_sc0006892.1_g060.1.mk/Pav_sc0002270.1_g100.1.mk/Pav_sc0002207.1_g400.1.mk/Pav_sc0000119.1_g650.1.mk	3	Pav_sc0001792.1_g090.1.mk/Pav_sc0005917.1_g050.1.br/Pav_sc0001926.1_g030.1.mk
BP	GO:0006091	generation of precursor metabolites and energy	0.711346	0.999998	Pav_sc0000659.1_g440.1.mk/Pav_sc0000672.1_g120.1.mk/Pav_sc0000044.1_g840.1.mk	3	1	Pav_sc0000044.1_g840.1.mk	2	Pav_sc0000659.1_g440.1.mk/Pav_sc0000672.1_g120.1.mk
BP	GO:1901575	organic substance catabolic process	0.717718	0.999998	Pav_sc0000659.1_g440.1.mk/Pav_sc0000672.1_g120.1.mk/Pav_sc0001792.1_g090.1.mk/Pav_sc0006892.1_g060.1.mk/Pav_sc0005917.1_g050.1.br/Pav_sc0002270.1_g100.1.mk/Pav_sc0002207.1_g400.1.mk/Pav_sc0000119.1_g650.1.mk/Pav_sc0000044.1_g840.1.mk/Pav_sc0001926.1_g030.1.mk	10	5	Pav_sc0006892.1_g060.1.mk/Pav_sc0002270.1_g100.1.mk/Pav_sc0002207.1_g400.1.mk/Pav_sc0000119.1_g650.1.mk/Pav_sc0000044.1_g840.1.mk	5	Pav_sc0000659.1_g440.1.mk/Pav_sc0000672.1_g120.1.mk/Pav_sc0001792.1_g090.1.mk/Pav_sc0005917.1_g050.1.br/Pav_sc0001926.1_g030.1.mk
BP	GO:0009117	nucleotide metabolic process	0.724171	0.999998	Pav_sc0000659.1_g440.1.mk/Pav_sc0000419.1_g100.1.mk/Pav_sc0000672.1_g120.1.mk/Pav_sc0000568.1_g560.1.mk/Pav_sc0000044.1_g840.1.mk	5	2	Pav_sc0000419.1_g100.1.mk/Pav_sc0000044.1_g840.1.mk	3	Pav_sc0000659.1_g440.1.mk/Pav_sc0000672.1_g120.1.mk/Pav_sc0000568.1_g560.1.mk
BP	GO:0006413	translational initiation	0.726054	0.999998	Pav_sc0000296.1_g100.1.mk	1	0		1	Pav_sc0000296.1_g100.1.mk
BP	GO:0006813	potassium ion transport	0.726054	0.999998	Pav_sc0000103.1_g980.1.mk	1	1	Pav_sc0000103.1_g980.1.mk	0
BP	GO:0009123	nucleoside monophosphate metabolic process	0.734014	0.999998	Pav_sc0000659.1_g440.1.mk/Pav_sc0000672.1_g120.1.mk/Pav_sc0000044.1_g840.1.mk	3	1	Pav_sc0000044.1_g840.1.mk	2	Pav_sc0000659.1_g440.1.mk/Pav_sc0000672.1_g120.1.mk
BP	GO:0009126	purine nucleoside monophosphate metabolic process	0.734014	0.999998	Pav_sc0000659.1_g440.1.mk/Pav_sc0000672.1_g120.1.mk/Pav_sc0000044.1_g840.1.mk	3	1	Pav_sc0000044.1_g840.1.mk	2	Pav_sc0000659.1_g440.1.mk/Pav_sc0000672.1_g120.1.mk
BP	GO:0009161	ribonucleoside monophosphate metabolic process	0.734014	0.999998	Pav_sc0000659.1_g440.1.mk/Pav_sc0000672.1_g120.1.mk/Pav_sc0000044.1_g840.1.mk	3	1	Pav_sc0000044.1_g840.1.mk	2	Pav_sc0000659.1_g440.1.mk/Pav_sc0000672.1_g120.1.mk
BP	GO:0009167	purine ribonucleoside monophosphate metabolic process	0.734014	0.999998	Pav_sc0000659.1_g440.1.mk/Pav_sc0000672.1_g120.1.mk/Pav_sc0000044.1_g840.1.mk	3	1	Pav_sc0000044.1_g840.1.mk	2	Pav_sc0000659.1_g440.1.mk/Pav_sc0000672.1_g120.1.mk
BP	GO:0003333	amino acid transmembrane transport	0.744132	0.999998	Pav_sc0001877.1_g040.1.mk	1	1	Pav_sc0001877.1_g040.1.mk	0
BP	GO:0006865	amino acid transport	0.744132	0.999998	Pav_sc0001877.1_g040.1.mk	1	1	Pav_sc0001877.1_g040.1.mk	0
BP	GO:0009308	amine metabolic process	0.744132	0.999998	Pav_sc0002208.1_g430.1.mk	1	1	Pav_sc0002208.1_g430.1.mk	0
BP	GO:0098656	anion transmembrane transport	0.744132	0.999998	Pav_sc0001877.1_g040.1.mk	1	1	Pav_sc0001877.1_g040.1.mk	0
BP	GO:1903825	organic acid transmembrane transport	0.744132	0.999998	Pav_sc0001877.1_g040.1.mk	1	1	Pav_sc0001877.1_g040.1.mk	0
BP	GO:1905039	carboxylic acid transmembrane transport	0.744132	0.999998	Pav_sc0001877.1_g040.1.mk	1	1	Pav_sc0001877.1_g040.1.mk	0
BP	GO:0006164	purine nucleotide biosynthetic process	0.761019	0.999998	Pav_sc0000568.1_g560.1.mk	1	0		1	Pav_sc0000568.1_g560.1.mk
BP	GO:0019725	cellular homeostasis	0.772992	0.999998	Pav_sc0000877.1_g930.1.mk/Pav_sc0001545.1_g150.1.mk/Pav_sc0002584.1_g180.1.mk/Pav_sc0000375.1_g790.1.mk	4	1	Pav_sc0002584.1_g180.1.mk	3	Pav_sc0000877.1_g930.1.mk/Pav_sc0001545.1_g150.1.mk/Pav_sc0000375.1_g790.1.mk
BP	GO:0009056	catabolic process	0.773899	0.999998	Pav_sc0000659.1_g440.1.mk/Pav_sc0000672.1_g120.1.mk/Pav_sc0001792.1_g090.1.mk/Pav_sc0006892.1_g060.1.mk/Pav_sc0005917.1_g050.1.br/Pav_sc0002270.1_g100.1.mk/Pav_sc0002207.1_g400.1.mk/Pav_sc0000119.1_g650.1.mk/Pav_sc0000044.1_g840.1.mk/Pav_sc0001926.1_g030.1.mk	10	5	Pav_sc0006892.1_g060.1.mk/Pav_sc0002270.1_g100.1.mk/Pav_sc0002207.1_g400.1.mk/Pav_sc0000119.1_g650.1.mk/Pav_sc0000044.1_g840.1.mk	5	Pav_sc0000659.1_g440.1.mk/Pav_sc0000672.1_g120.1.mk/Pav_sc0001792.1_g090.1.mk/Pav_sc0005917.1_g050.1.br/Pav_sc0001926.1_g030.1.mk
BP	GO:0072522	purine-containing compound biosynthetic process	0.776795	0.999998	Pav_sc0000568.1_g560.1.mk	1	0		1	Pav_sc0000568.1_g560.1.mk
BP	GO:0042592	homeostatic process	0.789606	0.999998	Pav_sc0000877.1_g930.1.mk/Pav_sc0001545.1_g150.1.mk/Pav_sc0002584.1_g180.1.mk/Pav_sc0000375.1_g790.1.mk	4	1	Pav_sc0002584.1_g180.1.mk	3	Pav_sc0000877.1_g930.1.mk/Pav_sc0001545.1_g150.1.mk/Pav_sc0000375.1_g790.1.mk
BP	GO:0072330	monocarboxylic acid biosynthetic process	0.791532	0.999998	Pav_sc0000174.1_g320.1.mk	1	0		1	Pav_sc0000174.1_g320.1.mk
BP	GO:1902600	hydrogen ion transmembrane transport	0.791532	0.999998	Pav_sc0002318.1_g420.1.mk	1	1	Pav_sc0002318.1_g420.1.mk	0
BP	GO:0009057	macromolecule catabolic process	0.796711	0.999998	Pav_sc0001792.1_g090.1.mk/Pav_sc0006892.1_g060.1.mk/Pav_sc0005917.1_g050.1.br/Pav_sc0002270.1_g100.1.mk/Pav_sc0001926.1_g030.1.mk	5	2	Pav_sc0006892.1_g060.1.mk/Pav_sc0002270.1_g100.1.mk	3	Pav_sc0001792.1_g090.1.mk/Pav_sc0005917.1_g050.1.br/Pav_sc0001926.1_g030.1.mk
BP	GO:0044262	cellular carbohydrate metabolic process	0.797542	0.999998	Pav_sc0000480.1_g990.1.mk/Pav_sc0007703.1_g010.1.mk/Pav_sc0006188.1_g050.1.mk/Pav_sc0000500.1_g060.1.mk	4	3	Pav_sc0007703.1_g010.1.mk/Pav_sc0006188.1_g050.1.mk/Pav_sc0000500.1_g060.1.mk	1	Pav_sc0000480.1_g990.1.mk
BP	GO:0008610	lipid biosynthetic process	0.805236	0.999998	Pav_sc0007703.1_g010.1.mk/Pav_sc0000174.1_g320.1.mk/Novel00069/Pav_sc0006660.1_g020.1.mk	4	3	Pav_sc0007703.1_g010.1.mk/Novel00069/Pav_sc0006660.1_g020.1.mk	1	Pav_sc0000174.1_g320.1.mk
BP	GO:0043038	amino acid activation	0.810874	0.999998	Pav_sc0012316.1_g010.1.mk/Pav_sc0000329.1_g020.1.mk/Pav_sc0005193.1_g060.1.mk	3	1	Pav_sc0000329.1_g020.1.mk	2	Pav_sc0012316.1_g010.1.mk/Pav_sc0005193.1_g060.1.mk
BP	GO:0043039	tRNA aminoacylation	0.810874	0.999998	Pav_sc0012316.1_g010.1.mk/Pav_sc0000329.1_g020.1.mk/Pav_sc0005193.1_g060.1.mk	3	1	Pav_sc0000329.1_g020.1.mk	2	Pav_sc0012316.1_g010.1.mk/Pav_sc0005193.1_g060.1.mk
BP	GO:0098655	cation transmembrane transport	0.815801	0.999998	Pav_sc0000103.1_g980.1.mk/Pav_sc0002318.1_g420.1.mk	2	2	Pav_sc0000103.1_g980.1.mk/Pav_sc0002318.1_g420.1.mk	0
BP	GO:0098660	inorganic ion transmembrane transport	0.815801	0.999998	Pav_sc0000103.1_g980.1.mk/Pav_sc0002318.1_g420.1.mk	2	2	Pav_sc0000103.1_g980.1.mk/Pav_sc0002318.1_g420.1.mk	0
BP	GO:0098662	inorganic cation transmembrane transport	0.815801	0.999998	Pav_sc0000103.1_g980.1.mk/Pav_sc0002318.1_g420.1.mk	2	2	Pav_sc0000103.1_g980.1.mk/Pav_sc0002318.1_g420.1.mk	0
BP	GO:0065008	regulation of biological quality	0.817284	0.999998	Pav_sc0000877.1_g930.1.mk/Pav_sc0001545.1_g150.1.mk/Pav_sc0002208.1_g430.1.mk/Pav_sc0002584.1_g180.1.mk/Pav_sc0000375.1_g790.1.mk	5	2	Pav_sc0002208.1_g430.1.mk/Pav_sc0002584.1_g180.1.mk	3	Pav_sc0000877.1_g930.1.mk/Pav_sc0001545.1_g150.1.mk/Pav_sc0000375.1_g790.1.mk
BP	GO:0008654	phospholipid biosynthetic process	0.818157	0.999998	Pav_sc0007703.1_g010.1.mk	1	1	Pav_sc0007703.1_g010.1.mk	0
BP	GO:0090407	organophosphate biosynthetic process	0.819027	0.999998	Pav_sc0000419.1_g100.1.mk/Pav_sc0007703.1_g010.1.mk/Pav_sc0000568.1_g560.1.mk	3	2	Pav_sc0000419.1_g100.1.mk/Pav_sc0007703.1_g010.1.mk	1	Pav_sc0000568.1_g560.1.mk
BP	GO:0006260	DNA replication	0.825125	0.999998	Pav_sc0000013.1_g050.1.mk/Pav_sc0000103.1_g1380.1.mk	2	2	Pav_sc0000013.1_g050.1.mk/Pav_sc0000103.1_g1380.1.mk	0
BP	GO:0044255	cellular lipid metabolic process	0.83005	0.999998	Pav_sc0002842.1_g150.1.mk/Pav_sc0007703.1_g010.1.mk/Pav_sc0000174.1_g320.1.mk/Pav_sc0002207.1_g400.1.mk/Pav_sc0006660.1_g020.1.mk	5	3	Pav_sc0007703.1_g010.1.mk/Pav_sc0002207.1_g400.1.mk/Pav_sc0006660.1_g020.1.mk	2	Pav_sc0002842.1_g150.1.mk/Pav_sc0000174.1_g320.1.mk
BP	GO:0009150	purine ribonucleotide metabolic process	0.834439	0.999998	Pav_sc0000659.1_g440.1.mk/Pav_sc0000672.1_g120.1.mk/Pav_sc0000044.1_g840.1.mk	3	1	Pav_sc0000044.1_g840.1.mk	2	Pav_sc0000659.1_g440.1.mk/Pav_sc0000672.1_g120.1.mk
BP	GO:0009259	ribonucleotide metabolic process	0.834439	0.999998	Pav_sc0000659.1_g440.1.mk/Pav_sc0000672.1_g120.1.mk/Pav_sc0000044.1_g840.1.mk	3	1	Pav_sc0000044.1_g840.1.mk	2	Pav_sc0000659.1_g440.1.mk/Pav_sc0000672.1_g120.1.mk
BP	GO:0034220	ion transmembrane transport	0.834439	0.999998	Pav_sc0000103.1_g980.1.mk/Pav_sc0001877.1_g040.1.mk/Pav_sc0002318.1_g420.1.mk	3	3	Pav_sc0000103.1_g980.1.mk/Pav_sc0001877.1_g040.1.mk/Pav_sc0002318.1_g420.1.mk	0
BP	GO:0043933	macromolecular complex subunit organization	0.841714	0.999998	Pav_sc0011838.1_g010.1.mk/Pav_sc0000543.1_g560.1.br/Pav_co4014565.1_g010.1.mk	3	2	Pav_sc0000543.1_g560.1.br/Pav_co4014565.1_g010.1.mk	1	Pav_sc0011838.1_g010.1.mk
BP	GO:0051716	cellular response to stimulus	0.848507	0.999998	Pav_sc0000983.1_g380.1.mk/Pav_sc0002136.1_g040.1.mk/Pav_sc0001323.1_g340.1.mk/Pav_sc0000377.1_g370.1.mk/Pav_sc0003183.1_g100.1.mk/Pav_sc0004298.1_g150.1.mk/Pav_sc0003974.1_g100.1.br/Pav_sc0000412.1_g460.1.mk/Novel00502/Pav_sc0004298.1_g070.1.mk/Pav_sc0009684.1_g010.1.mk/Pav_sc0000412.1_g470.1.br/Pav_sc0002136.1_g060.1.br/Pav_sc0000736.1_g390.1.mk	14	9	Pav_sc0000377.1_g370.1.mk/Pav_sc0004298.1_g150.1.mk/Pav_sc0003974.1_g100.1.br/Pav_sc0000412.1_g460.1.mk/Novel00502/Pav_sc0004298.1_g070.1.mk/Pav_sc0009684.1_g010.1.mk/Pav_sc0000412.1_g470.1.br/Pav_sc0000736.1_g390.1.mk	5	Pav_sc0000983.1_g380.1.mk/Pav_sc0002136.1_g040.1.mk/Pav_sc0001323.1_g340.1.mk/Pav_sc0003183.1_g100.1.mk/Pav_sc0002136.1_g060.1.br
BP	GO:0006732	coenzyme metabolic process	0.855438	0.999998	Pav_sc0000659.1_g440.1.mk/Pav_sc0000672.1_g120.1.mk/Pav_sc0000044.1_g840.1.mk	3	1	Pav_sc0000044.1_g840.1.mk	2	Pav_sc0000659.1_g440.1.mk/Pav_sc0000672.1_g120.1.mk
BP	GO:0044265	cellular macromolecule catabolic process	0.861902	0.999998	Pav_sc0006892.1_g060.1.mk/Pav_sc0002270.1_g100.1.mk/Pav_sc0001926.1_g030.1.mk	3	2	Pav_sc0006892.1_g060.1.mk/Pav_sc0002270.1_g100.1.mk	1	Pav_sc0001926.1_g030.1.mk
BP	GO:0019693	ribose phosphate metabolic process	0.868112	0.999998	Pav_sc0000659.1_g440.1.mk/Pav_sc0000672.1_g120.1.mk/Pav_sc0000044.1_g840.1.mk	3	1	Pav_sc0000044.1_g840.1.mk	2	Pav_sc0000659.1_g440.1.mk/Pav_sc0000672.1_g120.1.mk
BP	GO:0044723	single-organism carbohydrate metabolic process	0.870511	0.999998	Pav_sc0000659.1_g440.1.mk/Pav_sc0007703.1_g010.1.mk/Pav_sc0000672.1_g120.1.mk/Pav_sc0006188.1_g050.1.mk/Pav_sc0000500.1_g060.1.mk/Pav_sc0000044.1_g840.1.mk	6	4	Pav_sc0007703.1_g010.1.mk/Pav_sc0006188.1_g050.1.mk/Pav_sc0000500.1_g060.1.mk/Pav_sc0000044.1_g840.1.mk	2	Pav_sc0000659.1_g440.1.mk/Pav_sc0000672.1_g120.1.mk
BP	GO:1901135	carbohydrate derivative metabolic process	0.880236	0.999998	Pav_sc0000659.1_g440.1.mk/Pav_sc0000672.1_g120.1.mk/Pav_sc0001792.1_g090.1.mk/Pav_sc0007306.1_g010.1.br/Pav_sc0000359.1_g230.1.mk/Pav_sc0005917.1_g050.1.br/Pav_sc0000212.1_g360.1.mk/Pav_sc0000044.1_g840.1.mk	8	3	Pav_sc0000359.1_g230.1.mk/Pav_sc0000212.1_g360.1.mk/Pav_sc0000044.1_g840.1.mk	5	Pav_sc0000659.1_g440.1.mk/Pav_sc0000672.1_g120.1.mk/Pav_sc0001792.1_g090.1.mk/Pav_sc0007306.1_g010.1.br/Pav_sc0005917.1_g050.1.br
BP	GO:0045454	cell redox homeostasis	0.885291	0.999998	Pav_sc0000877.1_g930.1.mk/Pav_sc0001545.1_g150.1.mk/Pav_sc0002584.1_g180.1.mk	3	1	Pav_sc0002584.1_g180.1.mk	2	Pav_sc0000877.1_g930.1.mk/Pav_sc0001545.1_g150.1.mk
BP	GO:0015672	monovalent inorganic cation transport	0.891695	0.999998	Pav_sc0000103.1_g980.1.mk/Pav_sc0002318.1_g420.1.mk	2	2	Pav_sc0000103.1_g980.1.mk/Pav_sc0002318.1_g420.1.mk	0
BP	GO:0019637	organophosphate metabolic process	0.893023	0.999998	Pav_sc0000659.1_g440.1.mk/Pav_sc0000419.1_g100.1.mk/Pav_sc0007703.1_g010.1.mk/Pav_sc0000672.1_g120.1.mk/Pav_sc0000568.1_g560.1.mk/Pav_sc0000119.1_g650.1.mk/Pav_sc0000044.1_g840.1.mk	7	4	Pav_sc0000419.1_g100.1.mk/Pav_sc0007703.1_g010.1.mk/Pav_sc0000119.1_g650.1.mk/Pav_sc0000044.1_g840.1.mk	3	Pav_sc0000659.1_g440.1.mk/Pav_sc0000672.1_g120.1.mk/Pav_sc0000568.1_g560.1.mk
BP	GO:0006818	hydrogen transport	0.901736	0.999998	Pav_sc0002318.1_g420.1.mk	1	1	Pav_sc0002318.1_g420.1.mk	0
BP	GO:0015992	proton transport	0.901736	0.999998	Pav_sc0002318.1_g420.1.mk	1	1	Pav_sc0002318.1_g420.1.mk	0
BP	GO:0006418	tRNA aminoacylation for protein translation	0.908059	0.999998	Pav_sc0012316.1_g010.1.mk/Pav_sc0005193.1_g060.1.mk	2	0		2	Pav_sc0012316.1_g010.1.mk/Pav_sc0005193.1_g060.1.mk
BP	GO:0022607	cellular component assembly	0.909527	0.999998	Pav_sc0011838.1_g010.1.mk/Pav_co4014565.1_g010.1.mk/Pav_sc0001196.1_g680.1.mk	3	2	Pav_co4014565.1_g010.1.mk/Pav_sc0001196.1_g680.1.mk	1	Pav_sc0011838.1_g010.1.mk
BP	GO:0065003	macromolecular complex assembly	0.91298	0.999998	Pav_sc0011838.1_g010.1.mk/Pav_co4014565.1_g010.1.mk	2	1	Pav_co4014565.1_g010.1.mk	1	Pav_sc0011838.1_g010.1.mk
BP	GO:0006629	lipid metabolic process	0.915441	0.999998	Pav_sc0002842.1_g150.1.mk/Pav_sc0001974.1_g080.1.mk/Pav_sc0007703.1_g010.1.mk/Pav_sc0000174.1_g320.1.mk/Pav_sc0001502.1_g160.1.mk/Pav_sc0002207.1_g400.1.mk/Novel00069/Pav_sc0000591.1_g140.1.mk/Pav_sc0006660.1_g020.1.mk	9	6	Pav_sc0001974.1_g080.1.mk/Pav_sc0007703.1_g010.1.mk/Pav_sc0002207.1_g400.1.mk/Novel00069/Pav_sc0000591.1_g140.1.mk/Pav_sc0006660.1_g020.1.mk	3	Pav_sc0002842.1_g150.1.mk/Pav_sc0000174.1_g320.1.mk/Pav_sc0001502.1_g160.1.mk
BP	GO:0044765	single-organism transport	0.925199	0.999998	Pav_sc0000103.1_g980.1.mk/Pav_sc0000493.1_g150.1.mk/Pav_sc0001710.1_g310.1.mk/Pav_sc0001877.1_g040.1.mk/Pav_sc0000983.1_g630.1.mk/Pav_sc0000257.1_g490.1.br/Pav_sc0001073.1_g080.1.mk/Pav_sc0002318.1_g420.1.mk	8	8	Pav_sc0000103.1_g980.1.mk/Pav_sc0000493.1_g150.1.mk/Pav_sc0001710.1_g310.1.mk/Pav_sc0001877.1_g040.1.mk/Pav_sc0000983.1_g630.1.mk/Pav_sc0000257.1_g490.1.br/Pav_sc0001073.1_g080.1.mk/Pav_sc0002318.1_g420.1.mk	0
BP	GO:0015711	organic anion transport	0.925277	0.999998	Pav_sc0001877.1_g040.1.mk	1	1	Pav_sc0001877.1_g040.1.mk	0
BP	GO:0015849	organic acid transport	0.925277	0.999998	Pav_sc0001877.1_g040.1.mk	1	1	Pav_sc0001877.1_g040.1.mk	0
BP	GO:0046942	carboxylic acid transport	0.925277	0.999998	Pav_sc0001877.1_g040.1.mk	1	1	Pav_sc0001877.1_g040.1.mk	0
BP	GO:0070647	protein modification by small protein conjugation or removal	0.92547	0.999998	Pav_sc0000040.1_g1010.1.mk/Pav_sc0001364.1_g030.1.mk/Pav_sc0003072.1_g100.1.mk	3	3	Pav_sc0000040.1_g1010.1.mk/Pav_sc0001364.1_g030.1.mk/Pav_sc0003072.1_g100.1.mk	0
BP	GO:0071705	nitrogen compound transport	0.928694	0.999998	Pav_sc0001954.1_g030.1.mk/Pav_sc0004298.1_g100.1.mk/Pav_sc0001877.1_g040.1.mk/Pav_sc0001925.1_g010.1.mk/Pav_sc0000396.1_g040.1.mk/Pav_sc0001709.1_g030.1.mk	6	4	Pav_sc0004298.1_g100.1.mk/Pav_sc0001877.1_g040.1.mk/Pav_sc0000396.1_g040.1.mk/Pav_sc0001709.1_g030.1.mk	2	Pav_sc0001954.1_g030.1.mk/Pav_sc0001925.1_g010.1.mk
BP	GO:0019752	carboxylic acid metabolic process	0.929416	0.999998	Pav_sc0000659.1_g440.1.mk/Pav_sc0002842.1_g150.1.mk/Pav_sc0000672.1_g120.1.mk/Pav_sc0012316.1_g010.1.mk/Pav_sc0000329.1_g020.1.mk/Pav_sc0000174.1_g320.1.mk/Pav_sc0005193.1_g060.1.mk/Pav_sc0012412.1_g010.1.br/Pav_sc0002207.1_g400.1.mk/Pav_sc0000044.1_g840.1.mk	10	4	Pav_sc0000329.1_g020.1.mk/Pav_sc0012412.1_g010.1.br/Pav_sc0002207.1_g400.1.mk/Pav_sc0000044.1_g840.1.mk	6	Pav_sc0000659.1_g440.1.mk/Pav_sc0002842.1_g150.1.mk/Pav_sc0000672.1_g120.1.mk/Pav_sc0012316.1_g010.1.mk/Pav_sc0000174.1_g320.1.mk/Pav_sc0005193.1_g060.1.mk
BP	GO:0043436	oxoacid metabolic process	0.933864	0.999998	Pav_sc0000659.1_g440.1.mk/Pav_sc0002842.1_g150.1.mk/Pav_sc0000672.1_g120.1.mk/Pav_sc0012316.1_g010.1.mk/Pav_sc0000329.1_g020.1.mk/Pav_sc0000174.1_g320.1.mk/Pav_sc0005193.1_g060.1.mk/Pav_sc0012412.1_g010.1.br/Pav_sc0002207.1_g400.1.mk/Pav_sc0000044.1_g840.1.mk	10	4	Pav_sc0000329.1_g020.1.mk/Pav_sc0012412.1_g010.1.br/Pav_sc0002207.1_g400.1.mk/Pav_sc0000044.1_g840.1.mk	6	Pav_sc0000659.1_g440.1.mk/Pav_sc0002842.1_g150.1.mk/Pav_sc0000672.1_g120.1.mk/Pav_sc0012316.1_g010.1.mk/Pav_sc0000174.1_g320.1.mk/Pav_sc0005193.1_g060.1.mk
BP	GO:0006486	protein glycosylation	0.934844	0.999998	Pav_sc0000359.1_g230.1.mk	1	1	Pav_sc0000359.1_g230.1.mk	0
BP	GO:0006511	ubiquitin-dependent protein catabolic process	0.934844	0.999998	Pav_sc0006892.1_g060.1.mk	1	1	Pav_sc0006892.1_g060.1.mk	0
BP	GO:0009100	glycoprotein metabolic process	0.934844	0.999998	Pav_sc0000359.1_g230.1.mk	1	1	Pav_sc0000359.1_g230.1.mk	0
BP	GO:0009101	glycoprotein biosynthetic process	0.934844	0.999998	Pav_sc0000359.1_g230.1.mk	1	1	Pav_sc0000359.1_g230.1.mk	0
BP	GO:0019941	modification-dependent protein catabolic process	0.934844	0.999998	Pav_sc0006892.1_g060.1.mk	1	1	Pav_sc0006892.1_g060.1.mk	0
BP	GO:0043413	macromolecule glycosylation	0.934844	0.999998	Pav_sc0000359.1_g230.1.mk	1	1	Pav_sc0000359.1_g230.1.mk	0
BP	GO:0043632	modification-dependent macromolecule catabolic process	0.934844	0.999998	Pav_sc0006892.1_g060.1.mk	1	1	Pav_sc0006892.1_g060.1.mk	0
BP	GO:1902578	single-organism localization	0.937287	0.999998	Pav_sc0000103.1_g980.1.mk/Pav_sc0000493.1_g150.1.mk/Pav_sc0001710.1_g310.1.mk/Pav_sc0001877.1_g040.1.mk/Pav_sc0000983.1_g630.1.mk/Pav_sc0000257.1_g490.1.br/Pav_sc0001073.1_g080.1.mk/Pav_sc0002318.1_g420.1.mk	8	8	Pav_sc0000103.1_g980.1.mk/Pav_sc0000493.1_g150.1.mk/Pav_sc0001710.1_g310.1.mk/Pav_sc0001877.1_g040.1.mk/Pav_sc0000983.1_g630.1.mk/Pav_sc0000257.1_g490.1.br/Pav_sc0001073.1_g080.1.mk/Pav_sc0002318.1_g420.1.mk	0
BP	GO:0006082	organic acid metabolic process	0.938068	0.999998	Pav_sc0000659.1_g440.1.mk/Pav_sc0002842.1_g150.1.mk/Pav_sc0000672.1_g120.1.mk/Pav_sc0012316.1_g010.1.mk/Pav_sc0000329.1_g020.1.mk/Pav_sc0000174.1_g320.1.mk/Pav_sc0005193.1_g060.1.mk/Pav_sc0012412.1_g010.1.br/Pav_sc0002207.1_g400.1.mk/Pav_sc0000044.1_g840.1.mk	10	4	Pav_sc0000329.1_g020.1.mk/Pav_sc0012412.1_g010.1.br/Pav_sc0002207.1_g400.1.mk/Pav_sc0000044.1_g840.1.mk	6	Pav_sc0000659.1_g440.1.mk/Pav_sc0002842.1_g150.1.mk/Pav_sc0000672.1_g120.1.mk/Pav_sc0012316.1_g010.1.mk/Pav_sc0000174.1_g320.1.mk/Pav_sc0005193.1_g060.1.mk
BP	GO:1901607	alpha-amino acid biosynthetic process	0.939159	0.999998	Pav_sc0012412.1_g010.1.br	1	1	Pav_sc0012412.1_g010.1.br	0
BP	GO:0051186	cofactor metabolic process	0.94732	0.999998	Pav_sc0000659.1_g440.1.mk/Pav_sc0000672.1_g120.1.mk/Pav_sc0000044.1_g840.1.mk	3	1	Pav_sc0000044.1_g840.1.mk	2	Pav_sc0000659.1_g440.1.mk/Pav_sc0000672.1_g120.1.mk
BP	GO:0044281	small molecule metabolic process	0.949238	0.999998	Pav_sc0000659.1_g440.1.mk/Pav_sc0002842.1_g150.1.mk/Pav_sc0000419.1_g100.1.mk/Pav_sc0007703.1_g010.1.mk/Pav_sc0000672.1_g120.1.mk/Pav_sc0012316.1_g010.1.mk/Pav_sc0000329.1_g020.1.mk/Pav_sc0000568.1_g560.1.mk/Pav_sc0007306.1_g010.1.br/Pav_sc0000174.1_g320.1.mk/Pav_sc0005193.1_g060.1.mk/Pav_sc0012412.1_g010.1.br/Pav_sc0000212.1_g360.1.mk/Pav_sc0002207.1_g400.1.mk/Pav_sc0000119.1_g650.1.mk/Pav_sc000…	16	8	Pav_sc0000419.1_g100.1.mk/Pav_sc0007703.1_g010.1.mk/Pav_sc0000329.1_g020.1.mk/Pav_sc0012412.1_g010.1.br/Pav_sc0000212.1_g360.1.mk/Pav_sc0002207.1_g400.1.mk/Pav_sc0000119.1_g650.1.mk/Pav_sc0000044.1_g840.1.mk	8	Pav_sc0000659.1_g440.1.mk/Pav_sc0002842.1_g150.1.mk/Pav_sc0000672.1_g120.1.mk/Pav_sc0012316.1_g010.1.mk/Pav_sc0000568.1_g560.1.mk/Pav_sc0007306.1_g010.1.br/Pav_sc0000174.1_g320.1.mk/Pav_sc0005193.1_g060.1.mk
BP	GO:0044283	small molecule biosynthetic process	0.949905	0.999998	Pav_sc0007703.1_g010.1.mk/Pav_sc0000174.1_g320.1.mk/Pav_sc0012412.1_g010.1.br	3	2	Pav_sc0007703.1_g010.1.mk/Pav_sc0012412.1_g010.1.br	1	Pav_sc0000174.1_g320.1.mk
BP	GO:0006281	DNA repair	0.950292	0.999998	Pav_sc0009684.1_g010.1.mk/Pav_sc0000736.1_g390.1.mk	2	2	Pav_sc0009684.1_g010.1.mk/Pav_sc0000736.1_g390.1.mk	0
BP	GO:0070085	glycosylation	0.950467	0.999998	Pav_sc0000359.1_g230.1.mk	1	1	Pav_sc0000359.1_g230.1.mk	0
BP	GO:0006974	cellular response to DNA damage stimulus	0.955645	0.999998	Pav_sc0009684.1_g010.1.mk/Pav_sc0000736.1_g390.1.mk	2	2	Pav_sc0009684.1_g010.1.mk/Pav_sc0000736.1_g390.1.mk	0
BP	GO:0033554	cellular response to stress	0.955645	0.999998	Pav_sc0009684.1_g010.1.mk/Pav_sc0000736.1_g390.1.mk	2	2	Pav_sc0009684.1_g010.1.mk/Pav_sc0000736.1_g390.1.mk	0
BP	GO:0005975	carbohydrate metabolic process	0.956132	0.999998	Pav_sc0000480.1_g990.1.mk/Pav_sc0000659.1_g440.1.mk/Pav_sc0007703.1_g010.1.mk/Pav_sc0000672.1_g120.1.mk/Pav_sc0000212.1_g420.1.mk/Pav_sc0000130.1_g860.1.mk/Pav_sc0006188.1_g050.1.mk/Pav_sc0000500.1_g060.1.mk/Pav_sc0004043.1_g010.1.mk/Pav_sc0005215.1_g030.1.mk/Pav_sc0000558.1_g320.1.mk/Pav_sc0000009.1_g240.1.mk/Pav_sc0000582.1_g630.1.mk/Pav_sc0000044.1_g840.1.mk/Pav_sc0000323.1_g010.1.mk/Pav_sc001…	18	11	Pav_sc0007703.1_g010.1.mk/Pav_sc0006188.1_g050.1.mk/Pav_sc0000500.1_g060.1.mk/Pav_sc0004043.1_g010.1.mk/Pav_sc0005215.1_g030.1.mk/Pav_sc0000558.1_g320.1.mk/Pav_sc0000582.1_g630.1.mk/Pav_sc0000044.1_g840.1.mk/Pav_sc0012345.1_g010.1.br/Pav_sc0001405.1_g1930.1.mk/Pav_sc0003279.1_g030.1.mk	7	Pav_sc0000480.1_g990.1.mk/Pav_sc0000659.1_g440.1.mk/Pav_sc0000672.1_g120.1.mk/Pav_sc0000212.1_g420.1.mk/Pav_sc0000130.1_g860.1.mk/Pav_sc0000009.1_g240.1.mk/Pav_sc0000323.1_g010.1.mk
BP	GO:0006644	phospholipid metabolic process	0.956815	0.999998	Pav_sc0007703.1_g010.1.mk	1	1	Pav_sc0007703.1_g010.1.mk	0
BP	GO:0016053	organic acid biosynthetic process	0.958111	0.999998	Pav_sc0000174.1_g320.1.mk/Pav_sc0012412.1_g010.1.br	2	1	Pav_sc0012412.1_g010.1.br	1	Pav_sc0000174.1_g320.1.mk
BP	GO:0046394	carboxylic acid biosynthetic process	0.958111	0.999998	Pav_sc0000174.1_g320.1.mk/Pav_sc0012412.1_g010.1.br	2	1	Pav_sc0012412.1_g010.1.br	1	Pav_sc0000174.1_g320.1.mk
BP	GO:1901605	alpha-amino acid metabolic process	0.962352	0.999998	Pav_sc0012412.1_g010.1.br	1	1	Pav_sc0012412.1_g010.1.br	0
BP	GO:0016043	cellular component organization	0.962513	0.999998	Pav_sc0000130.1_g870.1.mk/Pav_sc0011838.1_g010.1.mk/Pav_sc0000543.1_g560.1.br/Pav_co4014565.1_g010.1.mk/Pav_sc0001196.1_g680.1.mk/Pav_sc0000257.1_g1070.1.mk/Pav_sc0004475.1_g020.1.br/Pav_sc0003072.1_g100.1.mk	8	5	Pav_sc0000543.1_g560.1.br/Pav_co4014565.1_g010.1.mk/Pav_sc0001196.1_g680.1.mk/Pav_sc0004475.1_g020.1.br/Pav_sc0003072.1_g100.1.mk	3	Pav_sc0000130.1_g870.1.mk/Pav_sc0011838.1_g010.1.mk/Pav_sc0000257.1_g1070.1.mk
BP	GO:0006399	tRNA metabolic process	0.963094	0.999998	Pav_sc0012316.1_g010.1.mk/Pav_sc0000329.1_g020.1.mk/Pav_sc0005193.1_g060.1.mk	3	1	Pav_sc0000329.1_g020.1.mk	2	Pav_sc0012316.1_g010.1.mk/Pav_sc0005193.1_g060.1.mk
BP	GO:0006073	cellular glucan metabolic process	0.964848	0.999998	Pav_sc0000480.1_g990.1.mk	1	0		1	Pav_sc0000480.1_g990.1.mk
BP	GO:0044042	glucan metabolic process	0.964848	0.999998	Pav_sc0000480.1_g990.1.mk	1	0		1	Pav_sc0000480.1_g990.1.mk
BP	GO:0044264	cellular polysaccharide metabolic process	0.964848	0.999998	Pav_sc0000480.1_g990.1.mk	1	0		1	Pav_sc0000480.1_g990.1.mk
BP	GO:0008652	cellular amino acid biosynthetic process	0.96718	0.999998	Pav_sc0012412.1_g010.1.br	1	1	Pav_sc0012412.1_g010.1.br	0
BP	GO:0044257	cellular protein catabolic process	0.97139	0.999998	Pav_sc0006892.1_g060.1.mk	1	1	Pav_sc0006892.1_g060.1.mk	0
BP	GO:0051603	proteolysis involved in cellular protein catabolic process	0.97139	0.999998	Pav_sc0006892.1_g060.1.mk	1	1	Pav_sc0006892.1_g060.1.mk	0
BP	GO:0006886	intracellular protein transport	0.97204	0.999998	Pav_sc0004298.1_g100.1.mk/Pav_sc0001925.1_g010.1.mk	2	1	Pav_sc0004298.1_g100.1.mk	1	Pav_sc0001925.1_g010.1.mk
BP	GO:0030163	protein catabolic process	0.978263	0.999998	Pav_sc0006892.1_g060.1.mk	1	1	Pav_sc0006892.1_g060.1.mk	0
BP	GO:0034637	cellular carbohydrate biosynthetic process	0.978263	0.999998	Pav_sc0007703.1_g010.1.mk	1	1	Pav_sc0007703.1_g010.1.mk	0
BP	GO:0006520	cellular amino acid metabolic process	0.980005	0.999998	Pav_sc0012316.1_g010.1.mk/Pav_sc0000329.1_g020.1.mk/Pav_sc0005193.1_g060.1.mk/Pav_sc0012412.1_g010.1.br	4	2	Pav_sc0000329.1_g020.1.mk/Pav_sc0012412.1_g010.1.br	2	Pav_sc0012316.1_g010.1.mk/Pav_sc0005193.1_g060.1.mk
BP	GO:0005976	polysaccharide metabolic process	0.981054	0.999998	Pav_sc0000480.1_g990.1.mk	1	0		1	Pav_sc0000480.1_g990.1.mk
BP	GO:0034613	cellular protein localization	0.984469	0.999998	Pav_sc0004298.1_g100.1.mk/Pav_sc0001925.1_g010.1.mk	2	1	Pav_sc0004298.1_g100.1.mk	1	Pav_sc0001925.1_g010.1.mk
BP	GO:0046907	intracellular transport	0.984469	0.999998	Pav_sc0004298.1_g100.1.mk/Pav_sc0001925.1_g010.1.mk	2	1	Pav_sc0004298.1_g100.1.mk	1	Pav_sc0001925.1_g010.1.mk
BP	GO:0051649	establishment of localization in cell	0.984469	0.999998	Pav_sc0004298.1_g100.1.mk/Pav_sc0001925.1_g010.1.mk	2	1	Pav_sc0004298.1_g100.1.mk	1	Pav_sc0001925.1_g010.1.mk
BP	GO:0070727	cellular macromolecule localization	0.984469	0.999998	Pav_sc0004298.1_g100.1.mk/Pav_sc0001925.1_g010.1.mk	2	1	Pav_sc0004298.1_g100.1.mk	1	Pav_sc0001925.1_g010.1.mk
BP	GO:0015031	protein transport	0.986473	0.999998	Pav_sc0001954.1_g030.1.mk/Pav_sc0004298.1_g100.1.mk/Pav_sc0001925.1_g010.1.mk	3	1	Pav_sc0004298.1_g100.1.mk	2	Pav_sc0001954.1_g030.1.mk/Pav_sc0001925.1_g010.1.mk
BP	GO:0015833	peptide transport	0.986473	0.999998	Pav_sc0001954.1_g030.1.mk/Pav_sc0004298.1_g100.1.mk/Pav_sc0001925.1_g010.1.mk	3	1	Pav_sc0004298.1_g100.1.mk	2	Pav_sc0001954.1_g030.1.mk/Pav_sc0001925.1_g010.1.mk
BP	GO:0042886	amide transport	0.986473	0.999998	Pav_sc0001954.1_g030.1.mk/Pav_sc0004298.1_g100.1.mk/Pav_sc0001925.1_g010.1.mk	3	1	Pav_sc0004298.1_g100.1.mk	2	Pav_sc0001954.1_g030.1.mk/Pav_sc0001925.1_g010.1.mk
BP	GO:0016051	carbohydrate biosynthetic process	0.988293	0.999998	Pav_sc0007703.1_g010.1.mk	1	1	Pav_sc0007703.1_g010.1.mk	0
BP	GO:0045184	establishment of protein localization	0.989694	0.999998	Pav_sc0001954.1_g030.1.mk/Pav_sc0004298.1_g100.1.mk/Pav_sc0001925.1_g010.1.mk	3	1	Pav_sc0004298.1_g100.1.mk	2	Pav_sc0001954.1_g030.1.mk/Pav_sc0001925.1_g010.1.mk
BP	GO:0044085	cellular component biogenesis	0.990765	0.999998	Pav_sc0011838.1_g010.1.mk/Pav_co4014565.1_g010.1.mk/Pav_sc0001196.1_g680.1.mk	3	2	Pav_co4014565.1_g010.1.mk/Pav_sc0001196.1_g680.1.mk	1	Pav_sc0011838.1_g010.1.mk
BP	GO:0051641	cellular localization	0.991462	0.999998	Pav_sc0004298.1_g100.1.mk/Pav_sc0001925.1_g010.1.mk	2	1	Pav_sc0004298.1_g100.1.mk	1	Pav_sc0001925.1_g010.1.mk
BP	GO:0008104	protein localization	0.991727	0.999998	Pav_sc0001954.1_g030.1.mk/Pav_sc0004298.1_g100.1.mk/Pav_sc0001925.1_g010.1.mk	3	1	Pav_sc0004298.1_g100.1.mk	2	Pav_sc0001954.1_g030.1.mk/Pav_sc0001925.1_g010.1.mk
BP	GO:0034660	ncRNA metabolic process	0.992992	0.999998	Pav_sc0012316.1_g010.1.mk/Pav_sc0000329.1_g020.1.mk/Pav_sc0005193.1_g060.1.mk	3	1	Pav_sc0000329.1_g020.1.mk	2	Pav_sc0012316.1_g010.1.mk/Pav_sc0005193.1_g060.1.mk
BP	GO:0071840	cellular component organization or biogenesis	0.993752	0.999998	Pav_sc0000130.1_g870.1.mk/Pav_sc0011838.1_g010.1.mk/Pav_sc0000543.1_g560.1.br/Pav_co4014565.1_g010.1.mk/Pav_sc0001196.1_g680.1.mk/Pav_sc0000257.1_g1070.1.mk/Pav_sc0004475.1_g020.1.br/Pav_sc0003072.1_g100.1.mk	8	5	Pav_sc0000543.1_g560.1.br/Pav_co4014565.1_g010.1.mk/Pav_sc0001196.1_g680.1.mk/Pav_sc0004475.1_g020.1.br/Pav_sc0003072.1_g100.1.mk	3	Pav_sc0000130.1_g870.1.mk/Pav_sc0011838.1_g010.1.mk/Pav_sc0000257.1_g1070.1.mk
BP	GO:1901137	carbohydrate derivative biosynthetic process	0.99522	0.999998	Pav_sc0000359.1_g230.1.mk	1	1	Pav_sc0000359.1_g230.1.mk	0
BP	GO:0033036	macromolecule localization	0.995519	0.999998	Pav_sc0001954.1_g030.1.mk/Pav_sc0004298.1_g100.1.mk/Pav_sc0001925.1_g010.1.mk	3	1	Pav_sc0004298.1_g100.1.mk	2	Pav_sc0001954.1_g030.1.mk/Pav_sc0001925.1_g010.1.mk
BP	GO:0071702	organic substance transport	0.995681	0.999998	Pav_sc0001954.1_g030.1.mk/Pav_sc0004298.1_g100.1.mk/Pav_sc0001877.1_g040.1.mk/Pav_sc0001925.1_g010.1.mk	4	2	Pav_sc0004298.1_g100.1.mk/Pav_sc0001877.1_g040.1.mk	2	Pav_sc0001954.1_g030.1.mk/Pav_sc0001925.1_g010.1.mk
BP	GO:0044711	single-organism biosynthetic process	0.998634	0.999998	Pav_sc0000419.1_g100.1.mk/Pav_sc0007703.1_g010.1.mk/Pav_sc0000568.1_g560.1.mk/Pav_sc0000174.1_g320.1.mk/Pav_sc0012412.1_g010.1.br/Novel00069/Pav_sc0006660.1_g020.1.mk	7	5	Pav_sc0000419.1_g100.1.mk/Pav_sc0007703.1_g010.1.mk/Pav_sc0012412.1_g010.1.br/Novel00069/Pav_sc0006660.1_g020.1.mk	2	Pav_sc0000568.1_g560.1.mk/Pav_sc0000174.1_g320.1.mk
BP	GO:0006508	proteolysis	0.99934	0.999998	Pav_sc0000370.1_g370.1.mk/Pav_sc0000175.1_g550.1.mk/Pav_sc0006892.1_g060.1.mk/Pav_sc0010177.1_g010.1.br/Pav_sc0000037.1_g200.1.mk/Pav_sc0000691.1_g580.1.mk	6	5	Pav_sc0000370.1_g370.1.mk/Pav_sc0000175.1_g550.1.mk/Pav_sc0006892.1_g060.1.mk/Pav_sc0010177.1_g010.1.br/Pav_sc0000037.1_g200.1.mk	1	Pav_sc0000691.1_g580.1.mk
BP	GO:0016192	vesicle-mediated transport	0.999545	0.999998	Pav_sc0004298.1_g100.1.mk	1	1	Pav_sc0004298.1_g100.1.mk	0
BP	GO:0006996	organelle organization	0.999679	0.999998	Pav_sc0003072.1_g100.1.mk	1	1	Pav_sc0003072.1_g100.1.mk	0
BP	GO:0006518	peptide metabolic process	0.99992	0.999998	Pav_sc0000296.1_g100.1.mk/Pav_sc0012316.1_g010.1.mk/Pav_sc0000543.1_g560.1.br/Pav_sc0010469.1_g010.1.mk/Pav_sc0005193.1_g060.1.mk/Pav_sc0000040.1_g200.1.br/Pav_sc0000691.1_g580.1.mk	7	1	Pav_sc0000543.1_g560.1.br	6	Pav_sc0000296.1_g100.1.mk/Pav_sc0012316.1_g010.1.mk/Pav_sc0010469.1_g010.1.mk/Pav_sc0005193.1_g060.1.mk/Pav_sc0000040.1_g200.1.br/Pav_sc0000691.1_g580.1.mk
BP	GO:0043603	cellular amide metabolic process	0.999955	0.999998	Pav_sc0000296.1_g100.1.mk/Pav_sc0012316.1_g010.1.mk/Pav_sc0000543.1_g560.1.br/Pav_sc0010469.1_g010.1.mk/Pav_sc0005193.1_g060.1.mk/Pav_sc0000040.1_g200.1.br/Pav_sc0000691.1_g580.1.mk	7	1	Pav_sc0000543.1_g560.1.br	6	Pav_sc0000296.1_g100.1.mk/Pav_sc0012316.1_g010.1.mk/Pav_sc0010469.1_g010.1.mk/Pav_sc0005193.1_g060.1.mk/Pav_sc0000040.1_g200.1.br/Pav_sc0000691.1_g580.1.mk
BP	GO:0006412	translation	0.999959	0.999998	Pav_sc0000296.1_g100.1.mk/Pav_sc0012316.1_g010.1.mk/Pav_sc0000543.1_g560.1.br/Pav_sc0010469.1_g010.1.mk/Pav_sc0005193.1_g060.1.mk/Pav_sc0000040.1_g200.1.br	6	1	Pav_sc0000543.1_g560.1.br	5	Pav_sc0000296.1_g100.1.mk/Pav_sc0012316.1_g010.1.mk/Pav_sc0010469.1_g010.1.mk/Pav_sc0005193.1_g060.1.mk/Pav_sc0000040.1_g200.1.br
BP	GO:0043043	peptide biosynthetic process	0.999963	0.999998	Pav_sc0000296.1_g100.1.mk/Pav_sc0012316.1_g010.1.mk/Pav_sc0000543.1_g560.1.br/Pav_sc0010469.1_g010.1.mk/Pav_sc0005193.1_g060.1.mk/Pav_sc0000040.1_g200.1.br	6	1	Pav_sc0000543.1_g560.1.br	5	Pav_sc0000296.1_g100.1.mk/Pav_sc0012316.1_g010.1.mk/Pav_sc0010469.1_g010.1.mk/Pav_sc0005193.1_g060.1.mk/Pav_sc0000040.1_g200.1.br
BP	GO:0043604	amide biosynthetic process	0.999975	0.999998	Pav_sc0000296.1_g100.1.mk/Pav_sc0012316.1_g010.1.mk/Pav_sc0000543.1_g560.1.br/Pav_sc0010469.1_g010.1.mk/Pav_sc0005193.1_g060.1.mk/Pav_sc0000040.1_g200.1.br	6	1	Pav_sc0000543.1_g560.1.br	5	Pav_sc0000296.1_g100.1.mk/Pav_sc0012316.1_g010.1.mk/Pav_sc0010469.1_g010.1.mk/Pav_sc0005193.1_g060.1.mk/Pav_sc0000040.1_g200.1.br
BP	GO:1901566	organonitrogen compound biosynthetic process	0.999998	0.999998	Pav_sc0000419.1_g100.1.mk/Pav_sc0000296.1_g100.1.mk/Pav_sc0012316.1_g010.1.mk/Pav_sc0000543.1_g560.1.br/Pav_sc0010469.1_g010.1.mk/Pav_sc0000568.1_g560.1.mk/Pav_sc0005193.1_g060.1.mk/Pav_sc0000040.1_g200.1.br/Pav_sc0012412.1_g010.1.br	9	3	Pav_sc0000419.1_g100.1.mk/Pav_sc0000543.1_g560.1.br/Pav_sc0012412.1_g010.1.br	6	Pav_sc0000296.1_g100.1.mk/Pav_sc0012316.1_g010.1.mk/Pav_sc0010469.1_g010.1.mk/Pav_sc0000568.1_g560.1.mk/Pav_sc0005193.1_g060.1.mk/Pav_sc0000040.1_g200.1.br
CC	GO:0005618	cell wall	0.161018	0.999843	Pav_sc0000480.1_g990.1.mk/Pav_sc0000130.1_g870.1.mk/Pav_sc0000257.1_g1070.1.mk/Pav_sc0004475.1_g020.1.br	4	1	Pav_sc0004475.1_g020.1.br	3	Pav_sc0000480.1_g990.1.mk/Pav_sc0000130.1_g870.1.mk/Pav_sc0000257.1_g1070.1.mk
CC	GO:0030312	external encapsulating structure	0.161018	0.999843	Pav_sc0000480.1_g990.1.mk/Pav_sc0000130.1_g870.1.mk/Pav_sc0000257.1_g1070.1.mk/Pav_sc0004475.1_g020.1.br	4	1	Pav_sc0004475.1_g020.1.br	3	Pav_sc0000480.1_g990.1.mk/Pav_sc0000130.1_g870.1.mk/Pav_sc0000257.1_g1070.1.mk
CC	GO:0015630	microtubule cytoskeleton	0.173379	0.999843	Pav_sc0001846.1_g030.1.mk/Pav_sc0002828.1_g430.1.mk	2	2	Pav_sc0001846.1_g030.1.mk/Pav_sc0002828.1_g430.1.mk	0
CC	GO:0044430	cytoskeletal part	0.190752	0.999843	Pav_sc0000207.1_g620.1.mk/Pav_sc0001846.1_g030.1.mk/Pav_sc0002828.1_g430.1.mk	3	2	Pav_sc0001846.1_g030.1.mk/Pav_sc0002828.1_g430.1.mk	1	Pav_sc0000207.1_g620.1.mk
CC	GO:0005856	cytoskeleton	0.203082	0.999843	Pav_sc0000207.1_g620.1.mk/Pav_sc0001846.1_g030.1.mk/Pav_sc0002828.1_g430.1.mk	3	2	Pav_sc0001846.1_g030.1.mk/Pav_sc0002828.1_g430.1.mk	1	Pav_sc0000207.1_g620.1.mk
CC	GO:0071944	cell periphery	0.356443	0.999843	Pav_sc0000480.1_g990.1.mk/Pav_sc0000130.1_g870.1.mk/Pav_sc0000983.1_g380.1.mk/Pav_sc0000257.1_g1070.1.mk/Pav_sc0004475.1_g020.1.br	5	1	Pav_sc0004475.1_g020.1.br	4	Pav_sc0000480.1_g990.1.mk/Pav_sc0000130.1_g870.1.mk/Pav_sc0000983.1_g380.1.mk/Pav_sc0000257.1_g1070.1.mk
CC	GO:0005777	peroxisome	0.38496	0.999843	Pav_sc0002207.1_g400.1.mk	1	1	Pav_sc0002207.1_g400.1.mk	0
CC	GO:0042579	microbody	0.38496	0.999843	Pav_sc0002207.1_g400.1.mk	1	1	Pav_sc0002207.1_g400.1.mk	0
CC	GO:0048046	apoplast	0.414219	0.999843	Pav_sc0000480.1_g990.1.mk	1	0		1	Pav_sc0000480.1_g990.1.mk
CC	GO:0005739	mitochondrion	0.515222	0.999843	Pav_sc0011838.1_g010.1.mk/Pav_co4014565.1_g010.1.mk	2	1	Pav_co4014565.1_g010.1.mk	1	Pav_sc0011838.1_g010.1.mk
CC	GO:0005576	extracellular region	0.5181	0.999843	Pav_sc0000480.1_g990.1.mk	1	0		1	Pav_sc0000480.1_g990.1.mk
CC	GO:0015629	actin cytoskeleton	0.541082	0.999843	Pav_sc0000207.1_g620.1.mk	1	0		1	Pav_sc0000207.1_g620.1.mk
CC	GO:0044459	plasma membrane part	0.58384	0.999843	Pav_sc0000983.1_g380.1.mk	1	0		1	Pav_sc0000983.1_g380.1.mk
CC	GO:0005783	endoplasmic reticulum	0.600058	0.999843	Pav_sc0003135.1_g310.1.mk/Pav_sc0000691.1_g580.1.mk	2	0		2	Pav_sc0003135.1_g310.1.mk/Pav_sc0000691.1_g580.1.mk
CC	GO:0019898	extrinsic component of membrane	0.603716	0.999843	Pav_sc0000983.1_g380.1.mk	1	0		1	Pav_sc0000983.1_g380.1.mk
CC	GO:0005886	plasma membrane	0.622651	0.999843	Pav_sc0000983.1_g380.1.mk	1	0		1	Pav_sc0000983.1_g380.1.mk
CC	GO:0016469	proton-transporting two-sector ATPase complex	0.640691	0.999843	Pav_sc0002318.1_g420.1.mk	1	1	Pav_sc0002318.1_g420.1.mk	0
CC	GO:1905368	peptidase complex	0.657877	0.999843	Pav_sc0000691.1_g580.1.mk	1	0		1	Pav_sc0000691.1_g580.1.mk
CC	GO:0098796	membrane protein complex	0.693457	0.999843	Pav_sc0000983.1_g380.1.mk/Pav_sc0004298.1_g100.1.mk/Pav_sc0000691.1_g580.1.mk/Pav_sc0002318.1_g420.1.mk	4	2	Pav_sc0004298.1_g100.1.mk/Pav_sc0002318.1_g420.1.mk	2	Pav_sc0000983.1_g380.1.mk/Pav_sc0000691.1_g580.1.mk
CC	GO:0005789	endoplasmic reticulum membrane	0.704702	0.999843	Pav_sc0000691.1_g580.1.mk	1	0		1	Pav_sc0000691.1_g580.1.mk
CC	GO:0042175	nuclear outer membrane-endoplasmic reticulum membrane network	0.704702	0.999843	Pav_sc0000691.1_g580.1.mk	1	0		1	Pav_sc0000691.1_g580.1.mk
CC	GO:0044432	endoplasmic reticulum part	0.704702	0.999843	Pav_sc0000691.1_g580.1.mk	1	0		1	Pav_sc0000691.1_g580.1.mk
CC	GO:0030117	membrane coat	0.780151	0.999843	Pav_sc0004298.1_g100.1.mk	1	1	Pav_sc0004298.1_g100.1.mk	0
CC	GO:0048475	coated membrane	0.780151	0.999843	Pav_sc0004298.1_g100.1.mk	1	1	Pav_sc0004298.1_g100.1.mk	0
CC	GO:0005694	chromosome	0.787518	0.999843	Pav_sc0002270.1_g100.1.mk/Pav_sc0001926.1_g030.1.mk	2	1	Pav_sc0002270.1_g100.1.mk	1	Pav_sc0001926.1_g030.1.mk
CC	GO:1902494	catalytic complex	0.801204	0.999843	Pav_sc0000983.1_g380.1.mk/Pav_sc0001846.1_g030.1.mk/Pav_sc0002828.1_g430.1.mk/Pav_sc0000691.1_g580.1.mk	4	2	Pav_sc0001846.1_g030.1.mk/Pav_sc0002828.1_g430.1.mk	2	Pav_sc0000983.1_g380.1.mk/Pav_sc0000691.1_g580.1.mk
CC	GO:0012505	endomembrane system	0.916413	0.999843	Pav_sc0003135.1_g310.1.mk/Pav_sc0000691.1_g580.1.mk	2	0		2	Pav_sc0003135.1_g310.1.mk/Pav_sc0000691.1_g580.1.mk
CC	GO:0043234	protein complex	0.966206	0.999843	Pav_sc0000983.1_g380.1.mk/Pav_sc0004298.1_g100.1.mk/Pav_sc0000207.1_g620.1.mk/Pav_sc0001846.1_g030.1.mk/Pav_sc0002828.1_g430.1.mk/Pav_sc0000691.1_g580.1.mk/Pav_sc0002318.1_g420.1.mk	7	4	Pav_sc0004298.1_g100.1.mk/Pav_sc0001846.1_g030.1.mk/Pav_sc0002828.1_g430.1.mk/Pav_sc0002318.1_g420.1.mk	3	Pav_sc0000983.1_g380.1.mk/Pav_sc0000207.1_g620.1.mk/Pav_sc0000691.1_g580.1.mk
CC	GO:0043228	non-membrane-bounded organelle	0.981261	0.999843	Pav_sc0001392.1_g550.1.mk/Pav_sc0010469.1_g010.1.mk/Pav_sc0000207.1_g620.1.mk/Pav_sc0000040.1_g200.1.br/Pav_sc0002270.1_g100.1.mk/Pav_sc0001846.1_g030.1.mk/Pav_sc0002828.1_g430.1.mk/Pav_sc0001926.1_g030.1.mk	8	4	Pav_sc0001392.1_g550.1.mk/Pav_sc0002270.1_g100.1.mk/Pav_sc0001846.1_g030.1.mk/Pav_sc0002828.1_g430.1.mk	4	Pav_sc0010469.1_g010.1.mk/Pav_sc0000207.1_g620.1.mk/Pav_sc0000040.1_g200.1.br/Pav_sc0001926.1_g030.1.mk
CC	GO:0043232	intracellular non-membrane-bounded organelle	0.981261	0.999843	Pav_sc0001392.1_g550.1.mk/Pav_sc0010469.1_g010.1.mk/Pav_sc0000207.1_g620.1.mk/Pav_sc0000040.1_g200.1.br/Pav_sc0002270.1_g100.1.mk/Pav_sc0001846.1_g030.1.mk/Pav_sc0002828.1_g430.1.mk/Pav_sc0001926.1_g030.1.mk	8	4	Pav_sc0001392.1_g550.1.mk/Pav_sc0002270.1_g100.1.mk/Pav_sc0001846.1_g030.1.mk/Pav_sc0002828.1_g430.1.mk	4	Pav_sc0010469.1_g010.1.mk/Pav_sc0000207.1_g620.1.mk/Pav_sc0000040.1_g200.1.br/Pav_sc0001926.1_g030.1.mk
CC	GO:0043231	intracellular membrane-bounded organelle	0.989088	0.999843	Pav_sc0003135.1_g310.1.mk/Pav_sc0011838.1_g010.1.mk/Pav_sc0001009.1_g390.1.mk/Pav_sc0000013.1_g050.1.mk/Pav_sc0003614.1_g200.1.mk/Pav_sc0001827.1_g240.1.mk/Pav_co4014565.1_g010.1.mk/Pav_sc0002136.1_g280.1.mk/Pav_sc0000618.1_g380.1.mk/Pav_sc0002207.1_g400.1.mk/Pav_sc0001338.1_g320.1.mk/Pav_sc0000502.1_g710.1.mk/Pav_sc0001416.1_g150.1.mk/Pav_sc0000691.1_g580.1.mk	14	10	Pav_sc0001009.1_g390.1.mk/Pav_sc0000013.1_g050.1.mk/Pav_sc0001827.1_g240.1.mk/Pav_co4014565.1_g010.1.mk/Pav_sc0002136.1_g280.1.mk/Pav_sc0000618.1_g380.1.mk/Pav_sc0002207.1_g400.1.mk/Pav_sc0001338.1_g320.1.mk/Pav_sc0000502.1_g710.1.mk/Pav_sc0001416.1_g150.1.mk	4	Pav_sc0003135.1_g310.1.mk/Pav_sc0011838.1_g010.1.mk/Pav_sc0003614.1_g200.1.mk/Pav_sc0000691.1_g580.1.mk
CC	GO:0043227	membrane-bounded organelle	0.991377	0.999843	Pav_sc0003135.1_g310.1.mk/Pav_sc0011838.1_g010.1.mk/Pav_sc0001009.1_g390.1.mk/Pav_sc0000013.1_g050.1.mk/Pav_sc0003614.1_g200.1.mk/Pav_sc0001827.1_g240.1.mk/Pav_co4014565.1_g010.1.mk/Pav_sc0002136.1_g280.1.mk/Pav_sc0000618.1_g380.1.mk/Pav_sc0002207.1_g400.1.mk/Pav_sc0001338.1_g320.1.mk/Pav_sc0000502.1_g710.1.mk/Pav_sc0001416.1_g150.1.mk/Pav_sc0000691.1_g580.1.mk	14	10	Pav_sc0001009.1_g390.1.mk/Pav_sc0000013.1_g050.1.mk/Pav_sc0001827.1_g240.1.mk/Pav_co4014565.1_g010.1.mk/Pav_sc0002136.1_g280.1.mk/Pav_sc0000618.1_g380.1.mk/Pav_sc0002207.1_g400.1.mk/Pav_sc0001338.1_g320.1.mk/Pav_sc0000502.1_g710.1.mk/Pav_sc0001416.1_g150.1.mk	4	Pav_sc0003135.1_g310.1.mk/Pav_sc0011838.1_g010.1.mk/Pav_sc0003614.1_g200.1.mk/Pav_sc0000691.1_g580.1.mk
CC	GO:0044444	cytoplasmic part	0.995225	0.999843	Pav_sc0003135.1_g310.1.mk/Pav_sc0011838.1_g010.1.mk/Pav_sc0010469.1_g010.1.mk/Pav_sc0004298.1_g100.1.mk/Pav_co4014565.1_g010.1.mk/Pav_sc0000040.1_g200.1.br/Pav_sc0000618.1_g380.1.mk/Pav_sc0002207.1_g400.1.mk/Pav_sc0000691.1_g580.1.mk	9	4	Pav_sc0004298.1_g100.1.mk/Pav_co4014565.1_g010.1.mk/Pav_sc0000618.1_g380.1.mk/Pav_sc0002207.1_g400.1.mk	5	Pav_sc0003135.1_g310.1.mk/Pav_sc0011838.1_g010.1.mk/Pav_sc0010469.1_g010.1.mk/Pav_sc0000040.1_g200.1.br/Pav_sc0000691.1_g580.1.mk
CC	GO:0044422	organelle part	0.996834	0.999843	Pav_sc0000207.1_g620.1.mk/Pav_sc0001846.1_g030.1.mk/Pav_sc0002828.1_g430.1.mk/Pav_sc0000691.1_g580.1.mk	4	2	Pav_sc0001846.1_g030.1.mk/Pav_sc0002828.1_g430.1.mk	2	Pav_sc0000207.1_g620.1.mk/Pav_sc0000691.1_g580.1.mk
CC	GO:0044446	intracellular organelle part	0.996834	0.999843	Pav_sc0000207.1_g620.1.mk/Pav_sc0001846.1_g030.1.mk/Pav_sc0002828.1_g430.1.mk/Pav_sc0000691.1_g580.1.mk	4	2	Pav_sc0001846.1_g030.1.mk/Pav_sc0002828.1_g430.1.mk	2	Pav_sc0000207.1_g620.1.mk/Pav_sc0000691.1_g580.1.mk
CC	GO:0005634	nucleus	0.997195	0.999843	Pav_sc0001009.1_g390.1.mk/Pav_sc0000013.1_g050.1.mk/Pav_sc0003614.1_g200.1.mk/Pav_sc0001827.1_g240.1.mk/Pav_sc0002136.1_g280.1.mk/Pav_sc0001338.1_g320.1.mk/Pav_sc0000502.1_g710.1.mk/Pav_sc0001416.1_g150.1.mk	8	7	Pav_sc0001009.1_g390.1.mk/Pav_sc0000013.1_g050.1.mk/Pav_sc0001827.1_g240.1.mk/Pav_sc0002136.1_g280.1.mk/Pav_sc0001338.1_g320.1.mk/Pav_sc0000502.1_g710.1.mk/Pav_sc0001416.1_g150.1.mk	1	Pav_sc0003614.1_g200.1.mk
CC	GO:0005737	cytoplasm	0.997863	0.999843	Pav_sc0010253.1_g030.1.mk/Pav_sc0003135.1_g310.1.mk/Pav_sc0011838.1_g010.1.mk/Pav_sc0010469.1_g010.1.mk/Pav_sc0008183.1_g020.1.mk/Pav_sc0004298.1_g100.1.mk/Pav_co4014565.1_g010.1.mk/Pav_sc0000040.1_g200.1.br/Pav_sc0000618.1_g380.1.mk/Pav_sc0002207.1_g400.1.mk/Pav_sc0000691.1_g580.1.mk	11	6	Pav_sc0010253.1_g030.1.mk/Pav_sc0008183.1_g020.1.mk/Pav_sc0004298.1_g100.1.mk/Pav_co4014565.1_g010.1.mk/Pav_sc0000618.1_g380.1.mk/Pav_sc0002207.1_g400.1.mk	5	Pav_sc0003135.1_g310.1.mk/Pav_sc0011838.1_g010.1.mk/Pav_sc0010469.1_g010.1.mk/Pav_sc0000040.1_g200.1.br/Pav_sc0000691.1_g580.1.mk
CC	GO:0005840	ribosome	0.999464	0.999843	Pav_sc0010469.1_g010.1.mk/Pav_sc0000040.1_g200.1.br	2	0		2	Pav_sc0010469.1_g010.1.mk/Pav_sc0000040.1_g200.1.br
CC	GO:0030529	intracellular ribonucleoprotein complex	0.999843	0.999843	Pav_sc0010469.1_g010.1.mk/Pav_sc0000040.1_g200.1.br	2	0		2	Pav_sc0010469.1_g010.1.mk/Pav_sc0000040.1_g200.1.br
CC	GO:1990904	ribonucleoprotein complex	0.999843	0.999843	Pav_sc0010469.1_g010.1.mk/Pav_sc0000040.1_g200.1.br	2	0		2	Pav_sc0010469.1_g010.1.mk/Pav_sc0000040.1_g200.1.br
MF	GO:0043531	ADP binding	1.3e-11	2.51e-09	Pav_sc0003684.1_g050.1.br/Pav_sc0010946.1_g010.1.br/Pav_sc0000006.1_g120.1.mk/Pav_sc0000147.1_g040.1.br/Pav_sc0002136.1_g040.1.mk/Pav_sc0001524.1_g050.1.mk/Pav_sc0001323.1_g340.1.mk/Pav_sc0000102.1_g020.1.br/Pav_sc0000647.1_g010.1.mk/Pav_sc0001580.1_g490.1.mk/Pav_sc0000412.1_g370.1.mk/Pav_sc0003183.1_g100.1.mk/Pav_sc0001141.1_g020.1.br/Pav_sc0004298.1_g150.1.mk/Pav_sc0003965.1_g010.1.br/Pav_sc000…	50	30	Pav_sc0010946.1_g010.1.br/Pav_sc0000006.1_g120.1.mk/Pav_sc0000102.1_g020.1.br/Pav_sc0001580.1_g490.1.mk/Pav_sc0000412.1_g370.1.mk/Pav_sc0001141.1_g020.1.br/Pav_sc0004298.1_g150.1.mk/Pav_sc0003974.1_g100.1.br/Pav_sc0000412.1_g460.1.mk/Pav_sc0000412.1_g070.1.mk/Novel00502/Pav_sc0004298.1_g070.1.mk/Pav_sc0001580.1_g500.1.mk/Pav_sc0005979.1_g010.1.br/Pav_sc0000147.1_g070.1.br/Pav_sc0002756.1_g030.1.m…	20	Pav_sc0003684.1_g050.1.br/Pav_sc0000147.1_g040.1.br/Pav_sc0002136.1_g040.1.mk/Pav_sc0001524.1_g050.1.mk/Pav_sc0001323.1_g340.1.mk/Pav_sc0000647.1_g010.1.mk/Pav_sc0003183.1_g100.1.mk/Pav_sc0003965.1_g010.1.br/Pav_sc0003687.1_g030.1.mk/Pav_sc0002388.1_g090.1.br/Pav_sc0000545.1_g200.1.mk/Pav_sc0000882.1_g120.1.br/Pav_sc0005463.1_g010.1.br/Pav_sc0008178.1_g010.1.mk/Pav_sc0000387.1_g040.1.br/Pav_sc000…
MF	GO:0020037	heme binding	1.36e-09	9.97e-08	Pav_sc0000558.1_g610.1.br/Pav_sc0000558.1_g530.1.mk/Pav_sc0009583.1_g010.1.mk/Pav_sc0010253.1_g030.1.mk/Pav_sc0000563.1_g270.1.mk/Pav_sc0000890.1_g1200.1.mk/Pav_sc0000558.1_g600.1.mk/Pav_co3996163.1_g010.1.br/Pav_sc0000095.1_g1440.1.mk/Pav_sc0000370.1_g740.1.mk/Pav_sc0001580.1_g300.1.mk/Pav_sc0000017.1_g020.1.mk/Pav_sc0002234.1_g060.1.mk/Pav_sc0004628.1_g040.1.br/Pav_sc0000562.1_g100.1.mk/Pav_sc0…	40	21	Pav_sc0010253.1_g030.1.mk/Pav_sc0000563.1_g270.1.mk/Pav_sc0000890.1_g1200.1.mk/Pav_sc0000370.1_g740.1.mk/Pav_sc0001580.1_g300.1.mk/Pav_sc0002234.1_g060.1.mk/Pav_sc0000143.1_g650.1.mk/Pav_sc0000586.1_g760.1.mk/Pav_sc0006018.1_g020.1.mk/Pav_sc0008909.1_g040.1.mk/Pav_sc0000890.1_g930.1.mk/Pav_sc0000370.1_g540.1.mk/Pav_sc0000220.1_g1040.1.mk/Pav_sc0001196.1_g1100.1.mk/Pav_sc0000562.1_g080.1.br/Pav_sc…	19	Pav_sc0000558.1_g610.1.br/Pav_sc0000558.1_g530.1.mk/Pav_sc0009583.1_g010.1.mk/Pav_sc0000558.1_g600.1.mk/Pav_co3996163.1_g010.1.br/Pav_sc0000095.1_g1440.1.mk/Pav_sc0000017.1_g020.1.mk/Pav_sc0004628.1_g040.1.br/Pav_sc0000562.1_g100.1.mk/Pav_sc0003418.1_g010.1.br/Pav_sc0001134.1_g190.1.mk/Pav_sc0000898.1_g050.1.mk/Pav_sc0001110.1_g160.1.mk/Pav_sc0001502.1_g290.1.mk/Pav_sc0001355.1_g050.1.br/Pav_sc00…
MF	GO:0046906	tetrapyrrole binding	1.55e-09	9.97e-08	Pav_sc0000558.1_g610.1.br/Pav_sc0000558.1_g530.1.mk/Pav_sc0009583.1_g010.1.mk/Pav_sc0010253.1_g030.1.mk/Pav_sc0000563.1_g270.1.mk/Pav_sc0000890.1_g1200.1.mk/Pav_sc0000558.1_g600.1.mk/Pav_co3996163.1_g010.1.br/Pav_sc0000095.1_g1440.1.mk/Pav_sc0000370.1_g740.1.mk/Pav_sc0001580.1_g300.1.mk/Pav_sc0000017.1_g020.1.mk/Pav_sc0002234.1_g060.1.mk/Pav_sc0004628.1_g040.1.br/Pav_sc0000562.1_g100.1.mk/Pav_sc0…	40	21	Pav_sc0010253.1_g030.1.mk/Pav_sc0000563.1_g270.1.mk/Pav_sc0000890.1_g1200.1.mk/Pav_sc0000370.1_g740.1.mk/Pav_sc0001580.1_g300.1.mk/Pav_sc0002234.1_g060.1.mk/Pav_sc0000143.1_g650.1.mk/Pav_sc0000586.1_g760.1.mk/Pav_sc0006018.1_g020.1.mk/Pav_sc0008909.1_g040.1.mk/Pav_sc0000890.1_g930.1.mk/Pav_sc0000370.1_g540.1.mk/Pav_sc0000220.1_g1040.1.mk/Pav_sc0001196.1_g1100.1.mk/Pav_sc0000562.1_g080.1.br/Pav_sc…	19	Pav_sc0000558.1_g610.1.br/Pav_sc0000558.1_g530.1.mk/Pav_sc0009583.1_g010.1.mk/Pav_sc0000558.1_g600.1.mk/Pav_co3996163.1_g010.1.br/Pav_sc0000095.1_g1440.1.mk/Pav_sc0000017.1_g020.1.mk/Pav_sc0004628.1_g040.1.br/Pav_sc0000562.1_g100.1.mk/Pav_sc0003418.1_g010.1.br/Pav_sc0001134.1_g190.1.mk/Pav_sc0000898.1_g050.1.mk/Pav_sc0001110.1_g160.1.mk/Pav_sc0001502.1_g290.1.mk/Pav_sc0001355.1_g050.1.br/Pav_sc00…
MF	GO:0016705	oxidoreductase activity, acting on paired donors, with incorporation or reduction of molecular oxygen	5.7e-08	2.75e-06	Pav_sc0000558.1_g610.1.br/Pav_sc0000558.1_g530.1.mk/Pav_sc0009583.1_g010.1.mk/Pav_sc0002842.1_g150.1.mk/Pav_sc0000563.1_g270.1.mk/Pav_sc0000890.1_g1200.1.mk/Pav_sc0000558.1_g600.1.mk/Pav_co3996163.1_g010.1.br/Pav_sc0000095.1_g1440.1.mk/Pav_sc0000370.1_g740.1.mk/Pav_sc0001580.1_g300.1.mk/Pav_sc0004628.1_g040.1.br/Pav_sc0000562.1_g100.1.mk/Pav_sc0000143.1_g650.1.mk/Pav_sc0000586.1_g760.1.mk/Pav_sc0…	33	16	Pav_sc0000563.1_g270.1.mk/Pav_sc0000890.1_g1200.1.mk/Pav_sc0000370.1_g740.1.mk/Pav_sc0001580.1_g300.1.mk/Pav_sc0000143.1_g650.1.mk/Pav_sc0000586.1_g760.1.mk/Pav_sc0006018.1_g020.1.mk/Pav_sc0008909.1_g040.1.mk/Pav_sc0000890.1_g930.1.mk/Pav_sc0000370.1_g540.1.mk/Pav_sc0000220.1_g1040.1.mk/Pav_sc0001196.1_g1100.1.mk/Pav_sc0000562.1_g080.1.br/Pav_sc0000503.1_g830.1.mk/Pav_sc0009120.1_g010.1.mk/Pav_sc…	17	Pav_sc0000558.1_g610.1.br/Pav_sc0000558.1_g530.1.mk/Pav_sc0009583.1_g010.1.mk/Pav_sc0002842.1_g150.1.mk/Pav_sc0000558.1_g600.1.mk/Pav_co3996163.1_g010.1.br/Pav_sc0000095.1_g1440.1.mk/Pav_sc0004628.1_g040.1.br/Pav_sc0000562.1_g100.1.mk/Pav_sc0003418.1_g010.1.br/Pav_sc0001134.1_g190.1.mk/Pav_sc0000898.1_g050.1.mk/Pav_sc0001110.1_g160.1.mk/Pav_sc0001355.1_g050.1.br/Pav_sc0004628.1_g060.1.br/Pav_sc00…
MF	GO:0005506	iron ion binding	1.2e-07	4.63e-06	Pav_sc0000558.1_g610.1.br/Pav_sc0000558.1_g530.1.mk/Pav_sc0009583.1_g010.1.mk/Pav_sc0000563.1_g270.1.mk/Pav_sc0000890.1_g1200.1.mk/Pav_sc0000558.1_g600.1.mk/Pav_co3996163.1_g010.1.br/Pav_sc0000095.1_g1440.1.mk/Pav_sc0000370.1_g740.1.mk/Pav_sc0001580.1_g300.1.mk/Pav_sc0004628.1_g040.1.br/Pav_sc0000562.1_g100.1.mk/Pav_sc0000143.1_g650.1.mk/Pav_sc0000586.1_g760.1.mk/Pav_sc0006018.1_g020.1.mk/Pav_sc0…	33	16	Pav_sc0000563.1_g270.1.mk/Pav_sc0000890.1_g1200.1.mk/Pav_sc0000370.1_g740.1.mk/Pav_sc0001580.1_g300.1.mk/Pav_sc0000143.1_g650.1.mk/Pav_sc0000586.1_g760.1.mk/Pav_sc0006018.1_g020.1.mk/Pav_sc0008909.1_g040.1.mk/Pav_sc0000890.1_g930.1.mk/Pav_sc0000370.1_g540.1.mk/Pav_sc0000220.1_g1040.1.mk/Pav_sc0001196.1_g1100.1.mk/Pav_sc0000562.1_g080.1.br/Pav_sc0000503.1_g830.1.mk/Pav_sc0009120.1_g010.1.mk/Pav_sc…	17	Pav_sc0000558.1_g610.1.br/Pav_sc0000558.1_g530.1.mk/Pav_sc0009583.1_g010.1.mk/Pav_sc0000558.1_g600.1.mk/Pav_co3996163.1_g010.1.br/Pav_sc0000095.1_g1440.1.mk/Pav_sc0004628.1_g040.1.br/Pav_sc0000562.1_g100.1.mk/Pav_sc0003418.1_g010.1.br/Pav_sc0001134.1_g190.1.mk/Pav_sc0000898.1_g050.1.mk/Pav_sc0001110.1_g160.1.mk/Pav_sc0001355.1_g050.1.br/Pav_sc0004628.1_g060.1.br/Pav_sc0004628.1_g050.1.br/Pav_sc00…
MF	GO:0030246	carbohydrate binding	0.000963631	0.0309968	Pav_sc0000669.1_g040.1.br/Pav_sc0008597.1_g040.1.br/Pav_sc0008597.1_g030.1.br/Pav_sc0001150.1_g040.1.mk/Pav_sc0000857.1_g020.1.br/Pav_sc0001327.1_g020.1.br/Pav_sc0000915.1_g040.1.mk/Pav_sc0002777.1_g040.1.mk/Pav_sc0004550.1_g010.1.mk/Pav_sc0002060.1_g060.1.mk/Pav_sc0008059.1_g010.1.br/Pav_sc0000754.1_g830.1.mk/Pav_sc0001990.1_g110.1.mk/Pav_sc0002962.1_g080.1.mk/Pav_sc0000890.1_g140.1.br/Pav_sc000…	20	15	Pav_sc0000669.1_g040.1.br/Pav_sc0008597.1_g040.1.br/Pav_sc0008597.1_g030.1.br/Pav_sc0000857.1_g020.1.br/Pav_sc0001327.1_g020.1.br/Pav_sc0000915.1_g040.1.mk/Pav_sc0002060.1_g060.1.mk/Pav_sc0000754.1_g830.1.mk/Pav_sc0001990.1_g110.1.mk/Pav_sc0002962.1_g080.1.mk/Pav_sc0000890.1_g140.1.br/Pav_sc0002383.1_g130.1.br/Pav_sc0004485.1_g010.1.mk/Pav_sc0000161.1_g010.1.br/Pav_sc0001341.1_g110.1.br	5	Pav_sc0001150.1_g040.1.mk/Pav_sc0002777.1_g040.1.mk/Pav_sc0004550.1_g010.1.mk/Pav_sc0008059.1_g010.1.br/Pav_sc0005093.1_g050.1.br
MF	GO:0004857	enzyme inhibitor activity	0.00216525	0.0596989	Pav_sc0000028.1_g320.1.mk/Pav_sc0000130.1_g870.1.mk/Pav_sc0002233.1_g150.1.mk/Pav_sc0001102.1_g920.1.mk/Pav_sc0000370.1_g030.1.mk/Pav_sc0000893.1_g070.1.mk/Pav_sc0000370.1_g020.1.mk/Pav_sc0000257.1_g1070.1.mk/Pav_sc0004475.1_g020.1.br/Pav_sc0000028.1_g200.1.mk	10	1	Pav_sc0004475.1_g020.1.br	9	Pav_sc0000028.1_g320.1.mk/Pav_sc0000130.1_g870.1.mk/Pav_sc0002233.1_g150.1.mk/Pav_sc0001102.1_g920.1.mk/Pav_sc0000370.1_g030.1.mk/Pav_sc0000893.1_g070.1.mk/Pav_sc0000370.1_g020.1.mk/Pav_sc0000257.1_g1070.1.mk/Pav_sc0000028.1_g200.1.mk
MF	GO:0010333	terpene synthase activity	0.00260497	0.0628448	Pav_sc0006050.1_g050.1.mk/Pav_sc0006050.1_g040.1.mk/Pav_sc0001485.1_g060.1.mk/Pav_sc0001545.1_g020.1.mk/Pav_sc0001545.1_g060.1.mk	5	2	Pav_sc0001545.1_g020.1.mk/Pav_sc0001545.1_g060.1.mk	3	Pav_sc0006050.1_g050.1.mk/Pav_sc0006050.1_g040.1.mk/Pav_sc0001485.1_g060.1.mk
MF	GO:0001871	pattern binding	0.00357148	0.0689295	Pav_sc0000669.1_g040.1.br/Pav_sc0001150.1_g040.1.mk/Pav_sc0000857.1_g020.1.br/Pav_sc0000915.1_g040.1.mk/Pav_sc0002777.1_g040.1.mk/Pav_sc0004550.1_g010.1.mk/Pav_sc0002060.1_g060.1.mk/Pav_sc0000754.1_g830.1.mk/Pav_sc0001990.1_g110.1.mk/Pav_sc0004485.1_g010.1.mk/Pav_sc0000161.1_g010.1.br	11	8	Pav_sc0000669.1_g040.1.br/Pav_sc0000857.1_g020.1.br/Pav_sc0000915.1_g040.1.mk/Pav_sc0002060.1_g060.1.mk/Pav_sc0000754.1_g830.1.mk/Pav_sc0001990.1_g110.1.mk/Pav_sc0004485.1_g010.1.mk/Pav_sc0000161.1_g010.1.br	3	Pav_sc0001150.1_g040.1.mk/Pav_sc0002777.1_g040.1.mk/Pav_sc0004550.1_g010.1.mk
MF	GO:0030247	polysaccharide binding	0.00357148	0.0689295	Pav_sc0000669.1_g040.1.br/Pav_sc0001150.1_g040.1.mk/Pav_sc0000857.1_g020.1.br/Pav_sc0000915.1_g040.1.mk/Pav_sc0002777.1_g040.1.mk/Pav_sc0004550.1_g010.1.mk/Pav_sc0002060.1_g060.1.mk/Pav_sc0000754.1_g830.1.mk/Pav_sc0001990.1_g110.1.mk/Pav_sc0004485.1_g010.1.mk/Pav_sc0000161.1_g010.1.br	11	8	Pav_sc0000669.1_g040.1.br/Pav_sc0000857.1_g020.1.br/Pav_sc0000915.1_g040.1.mk/Pav_sc0002060.1_g060.1.mk/Pav_sc0000754.1_g830.1.mk/Pav_sc0001990.1_g110.1.mk/Pav_sc0004485.1_g010.1.mk/Pav_sc0000161.1_g010.1.br	3	Pav_sc0001150.1_g040.1.mk/Pav_sc0002777.1_g040.1.mk/Pav_sc0004550.1_g010.1.mk
MF	GO:0016838	carbon-oxygen lyase activity, acting on phosphates	0.00442941	0.077716	Pav_sc0006050.1_g050.1.mk/Pav_sc0006050.1_g040.1.mk/Pav_sc0001485.1_g060.1.mk/Pav_sc0001545.1_g020.1.mk/Pav_sc0001545.1_g060.1.mk	5	2	Pav_sc0001545.1_g020.1.mk/Pav_sc0001545.1_g060.1.mk	3	Pav_sc0006050.1_g050.1.mk/Pav_sc0006050.1_g040.1.mk/Pav_sc0001485.1_g060.1.mk
MF	GO:0016684	oxidoreductase activity, acting on peroxide as acceptor	0.00576722	0.0886616	Pav_sc0010253.1_g030.1.mk/Pav_sc0000017.1_g020.1.mk/Pav_sc0000028.1_g820.1.mk/Pav_sc0001502.1_g290.1.mk/Pav_sc0000886.1_g850.1.mk/Pav_sc0000099.1_g130.1.mk/Pav_sc0000103.1_g420.1.mk/Pav_sc0001323.1_g1090.1.mk/Pav_co4088935.1_g020.1.mk	9	6	Pav_sc0010253.1_g030.1.mk/Pav_sc0000028.1_g820.1.mk/Pav_sc0000886.1_g850.1.mk/Pav_sc0000099.1_g130.1.mk/Pav_sc0001323.1_g1090.1.mk/Pav_co4088935.1_g020.1.mk	3	Pav_sc0000017.1_g020.1.mk/Pav_sc0001502.1_g290.1.mk/Pav_sc0000103.1_g420.1.mk
MF	GO:0016682	oxidoreductase activity, acting on diphenols and related substances as donors, oxygen as acceptor	0.00597203	0.0886616	Pav_sc0002009.1_g110.1.mk/Pav_sc0002009.1_g150.1.mk/Pav_sc0002009.1_g170.1.mk/Pav_sc0002009.1_g130.1.mk	4	4	Pav_sc0002009.1_g110.1.mk/Pav_sc0002009.1_g150.1.mk/Pav_sc0002009.1_g170.1.mk/Pav_sc0002009.1_g130.1.mk	0
MF	GO:0005215	transporter activity	0.0109342	0.149484	Pav_sc0000622.1_g050.1.br/Pav_sc0001883.1_g240.1.mk/Pav_sc0001540.1_g110.1.mk/Pav_sc0002584.1_g140.1.mk/Pav_sc0000848.1_g990.1.mk/Pav_sc0000103.1_g980.1.mk/Pav_sc0001485.1_g080.1.mk/Pav_sc0000554.1_g1910.1.mk/Pav_sc0000493.1_g150.1.mk/Novel00123/Pav_sc0001742.1_g030.1.br/Pav_sc0000009.1_g1210.1.mk/Pav_sc0004467.1_g120.1.mk/Pav_sc0001412.1_g370.1.mk/Pav_sc0001710.1_g310.1.mk/Pav_sc0000591.1_g220.1…	39	35	Pav_sc0000622.1_g050.1.br/Pav_sc0001883.1_g240.1.mk/Pav_sc0001540.1_g110.1.mk/Pav_sc0000848.1_g990.1.mk/Pav_sc0000103.1_g980.1.mk/Pav_sc0001485.1_g080.1.mk/Pav_sc0000493.1_g150.1.mk/Novel00123/Pav_sc0001742.1_g030.1.br/Pav_sc0000009.1_g1210.1.mk/Pav_sc0004467.1_g120.1.mk/Pav_sc0001412.1_g370.1.mk/Pav_sc0001710.1_g310.1.mk/Pav_sc0000591.1_g220.1.mk/Pav_sc0000983.1_g630.1.mk/Pav_sc0004971.1_g080.1.…	4	Pav_sc0002584.1_g140.1.mk/Pav_sc0000554.1_g1910.1.mk/Pav_sc0000851.1_g080.1.br/Pav_sc0000480.1_g090.1.mk
MF	GO:0016209	antioxidant activity	0.0124294	0.149484	Pav_sc0010253.1_g030.1.mk/Pav_sc0000017.1_g020.1.mk/Pav_sc0000028.1_g820.1.mk/Pav_sc0001502.1_g290.1.mk/Pav_sc0000886.1_g850.1.mk/Pav_sc0000099.1_g130.1.mk/Pav_sc0000103.1_g420.1.mk/Pav_sc0001323.1_g1090.1.mk/Pav_co4088935.1_g020.1.mk	9	6	Pav_sc0010253.1_g030.1.mk/Pav_sc0000028.1_g820.1.mk/Pav_sc0000886.1_g850.1.mk/Pav_sc0000099.1_g130.1.mk/Pav_sc0001323.1_g1090.1.mk/Pav_co4088935.1_g020.1.mk	3	Pav_sc0000017.1_g020.1.mk/Pav_sc0001502.1_g290.1.mk/Pav_sc0000103.1_g420.1.mk
MF	GO:0000287	magnesium ion binding	0.0131032	0.149484	Pav_sc0000037.1_g120.1.mk/Pav_sc0000659.1_g440.1.mk/Pav_sc0006050.1_g050.1.mk/Pav_sc0006050.1_g040.1.mk/Pav_sc0001485.1_g060.1.mk/Pav_sc0012247.1_g010.1.mk/Pav_sc0001545.1_g020.1.mk/Pav_sc0001545.1_g060.1.mk	8	2	Pav_sc0001545.1_g020.1.mk/Pav_sc0001545.1_g060.1.mk	6	Pav_sc0000037.1_g120.1.mk/Pav_sc0000659.1_g440.1.mk/Pav_sc0006050.1_g050.1.mk/Pav_sc0006050.1_g040.1.mk/Pav_sc0001485.1_g060.1.mk/Pav_sc0012247.1_g010.1.mk
MF	GO:0016679	oxidoreductase activity, acting on diphenols and related substances as donors	0.013167	0.149484	Pav_sc0002009.1_g110.1.mk/Pav_sc0002009.1_g150.1.mk/Pav_sc0002009.1_g170.1.mk/Pav_sc0002009.1_g130.1.mk	4	4	Pav_sc0002009.1_g110.1.mk/Pav_sc0002009.1_g150.1.mk/Pav_sc0002009.1_g170.1.mk/Pav_sc0002009.1_g130.1.mk	0
MF	GO:0004601	peroxidase activity	0.0145989	0.156532	Pav_sc0010253.1_g030.1.mk/Pav_sc0000017.1_g020.1.mk/Pav_sc0001502.1_g290.1.mk/Pav_sc0000886.1_g850.1.mk/Pav_sc0000099.1_g130.1.mk/Pav_sc0000103.1_g420.1.mk/Pav_sc0001323.1_g1090.1.mk/Pav_co4088935.1_g020.1.mk	8	5	Pav_sc0010253.1_g030.1.mk/Pav_sc0000886.1_g850.1.mk/Pav_sc0000099.1_g130.1.mk/Pav_sc0001323.1_g1090.1.mk/Pav_co4088935.1_g020.1.mk	3	Pav_sc0000017.1_g020.1.mk/Pav_sc0001502.1_g290.1.mk/Pav_sc0000103.1_g420.1.mk
MF	GO:0004866	endopeptidase inhibitor activity	0.0316256	0.277443	Pav_sc0002233.1_g150.1.mk/Pav_sc0000370.1_g030.1.mk/Pav_sc0000370.1_g020.1.mk	3	0		3	Pav_sc0002233.1_g150.1.mk/Pav_sc0000370.1_g030.1.mk/Pav_sc0000370.1_g020.1.mk
MF	GO:0030414	peptidase inhibitor activity	0.0316256	0.277443	Pav_sc0002233.1_g150.1.mk/Pav_sc0000370.1_g030.1.mk/Pav_sc0000370.1_g020.1.mk	3	0		3	Pav_sc0002233.1_g150.1.mk/Pav_sc0000370.1_g030.1.mk/Pav_sc0000370.1_g020.1.mk
MF	GO:0061134	peptidase regulator activity	0.0316256	0.277443	Pav_sc0002233.1_g150.1.mk/Pav_sc0000370.1_g030.1.mk/Pav_sc0000370.1_g020.1.mk	3	0		3	Pav_sc0002233.1_g150.1.mk/Pav_sc0000370.1_g030.1.mk/Pav_sc0000370.1_g020.1.mk
MF	GO:0061135	endopeptidase regulator activity	0.0316256	0.277443	Pav_sc0002233.1_g150.1.mk/Pav_sc0000370.1_g030.1.mk/Pav_sc0000370.1_g020.1.mk	3	0		3	Pav_sc0002233.1_g150.1.mk/Pav_sc0000370.1_g030.1.mk/Pav_sc0000370.1_g020.1.mk
MF	GO:0005216	ion channel activity	0.0492876	0.365866	Novel00123/Pav_sc0000591.1_g220.1.mk/Pav_sc0000138.1_g1220.1.mk/Pav_sc0004485.1_g090.1.mk/Pav_sc0000851.1_g080.1.br/Pav_sc0000704.1_g260.1.mk/Pav_sc0000480.1_g090.1.mk	7	5	Novel00123/Pav_sc0000591.1_g220.1.mk/Pav_sc0000138.1_g1220.1.mk/Pav_sc0004485.1_g090.1.mk/Pav_sc0000704.1_g260.1.mk	2	Pav_sc0000851.1_g080.1.br/Pav_sc0000480.1_g090.1.mk
MF	GO:0015267	channel activity	0.0492876	0.365866	Novel00123/Pav_sc0000591.1_g220.1.mk/Pav_sc0000138.1_g1220.1.mk/Pav_sc0004485.1_g090.1.mk/Pav_sc0000851.1_g080.1.br/Pav_sc0000704.1_g260.1.mk/Pav_sc0000480.1_g090.1.mk	7	5	Novel00123/Pav_sc0000591.1_g220.1.mk/Pav_sc0000138.1_g1220.1.mk/Pav_sc0004485.1_g090.1.mk/Pav_sc0000704.1_g260.1.mk	2	Pav_sc0000851.1_g080.1.br/Pav_sc0000480.1_g090.1.mk
MF	GO:0022803	passive transmembrane transporter activity	0.0492876	0.365866	Novel00123/Pav_sc0000591.1_g220.1.mk/Pav_sc0000138.1_g1220.1.mk/Pav_sc0004485.1_g090.1.mk/Pav_sc0000851.1_g080.1.br/Pav_sc0000704.1_g260.1.mk/Pav_sc0000480.1_g090.1.mk	7	5	Novel00123/Pav_sc0000591.1_g220.1.mk/Pav_sc0000138.1_g1220.1.mk/Pav_sc0004485.1_g090.1.mk/Pav_sc0000704.1_g260.1.mk	2	Pav_sc0000851.1_g080.1.br/Pav_sc0000480.1_g090.1.mk
MF	GO:0022838	substrate-specific channel activity	0.0492876	0.365866	Novel00123/Pav_sc0000591.1_g220.1.mk/Pav_sc0000138.1_g1220.1.mk/Pav_sc0004485.1_g090.1.mk/Pav_sc0000851.1_g080.1.br/Pav_sc0000704.1_g260.1.mk/Pav_sc0000480.1_g090.1.mk	7	5	Novel00123/Pav_sc0000591.1_g220.1.mk/Pav_sc0000138.1_g1220.1.mk/Pav_sc0004485.1_g090.1.mk/Pav_sc0000704.1_g260.1.mk	2	Pav_sc0000851.1_g080.1.br/Pav_sc0000480.1_g090.1.mk
MF	GO:0008171	O-methyltransferase activity	0.0572509	0.409238	Pav_sc0002360.1_g070.1.mk/Pav_sc0000503.1_g330.1.mk/Pav_sc0000373.1_g1010.1.mk	3	2	Pav_sc0000503.1_g330.1.mk/Pav_sc0000373.1_g1010.1.mk	1	Pav_sc0002360.1_g070.1.mk
MF	GO:0001071	nucleic acid binding transcription factor activity	0.0753353	0.501369	Pav_sc0000130.1_g780.1.mk/Pav_sc0001102.1_g230.1.mk/Pav_sc0000254.1_g320.1.mk/Pav_sc0001582.1_g320.1.mk/Pav_sc0002318.1_g190.1.mk/Pav_sc0007634.1_g010.1.mk/Pav_sc0003614.1_g200.1.mk/Novel00046/Pav_sc0004456.1_g020.1.mk/Pav_sc0000038.1_g350.1.mk/Pav_sc0002136.1_g280.1.mk/Pav_sc0000502.1_g370.1.mk/Pav_sc0001488.1_g330.1.mk/Pav_sc0000381.1_g230.1.mk/Pav_sc0000502.1_g250.1.mk/Pav_sc0001338.1_g320.1.m…	20	16	Pav_sc0000254.1_g320.1.mk/Pav_sc0001582.1_g320.1.mk/Pav_sc0002318.1_g190.1.mk/Pav_sc0007634.1_g010.1.mk/Novel00046/Pav_sc0004456.1_g020.1.mk/Pav_sc0000038.1_g350.1.mk/Pav_sc0002136.1_g280.1.mk/Pav_sc0000502.1_g370.1.mk/Pav_sc0001488.1_g330.1.mk/Pav_sc0000381.1_g230.1.mk/Pav_sc0000502.1_g250.1.mk/Pav_sc0001338.1_g320.1.mk/Pav_sc0000502.1_g710.1.mk/Pav_sc0000759.1_g400.1.mk/Pav_sc0000502.1_g400.1.mk	4	Pav_sc0000130.1_g780.1.mk/Pav_sc0001102.1_g230.1.mk/Pav_sc0003614.1_g200.1.mk/Pav_sc0000055.1_g320.1.mk
MF	GO:0003700	transcription factor activity, sequence-specific DNA binding	0.0753353	0.501369	Pav_sc0000130.1_g780.1.mk/Pav_sc0001102.1_g230.1.mk/Pav_sc0000254.1_g320.1.mk/Pav_sc0001582.1_g320.1.mk/Pav_sc0002318.1_g190.1.mk/Pav_sc0007634.1_g010.1.mk/Pav_sc0003614.1_g200.1.mk/Novel00046/Pav_sc0004456.1_g020.1.mk/Pav_sc0000038.1_g350.1.mk/Pav_sc0002136.1_g280.1.mk/Pav_sc0000502.1_g370.1.mk/Pav_sc0001488.1_g330.1.mk/Pav_sc0000381.1_g230.1.mk/Pav_sc0000502.1_g250.1.mk/Pav_sc0001338.1_g320.1.m…	20	16	Pav_sc0000254.1_g320.1.mk/Pav_sc0001582.1_g320.1.mk/Pav_sc0002318.1_g190.1.mk/Pav_sc0007634.1_g010.1.mk/Novel00046/Pav_sc0004456.1_g020.1.mk/Pav_sc0000038.1_g350.1.mk/Pav_sc0002136.1_g280.1.mk/Pav_sc0000502.1_g370.1.mk/Pav_sc0001488.1_g330.1.mk/Pav_sc0000381.1_g230.1.mk/Pav_sc0000502.1_g250.1.mk/Pav_sc0001338.1_g320.1.mk/Pav_sc0000502.1_g710.1.mk/Pav_sc0000759.1_g400.1.mk/Pav_sc0000502.1_g400.1.mk	4	Pav_sc0000130.1_g780.1.mk/Pav_sc0001102.1_g230.1.mk/Pav_sc0003614.1_g200.1.mk/Pav_sc0000055.1_g320.1.mk
MF	GO:0016887	ATPase activity	0.0849407	0.538445	Pav_sc0000622.1_g050.1.br/Pav_sc0000848.1_g990.1.mk/Pav_sc0001742.1_g030.1.br/Pav_sc0001111.1_g280.1.mk/Pav_sc0001412.1_g370.1.mk/Pav_sc0000855.1_g030.1.mk/Pav_sc0001412.1_g380.1.mk/Pav_sc0000004.1_g040.1.mk/Novel00406/Pav_sc0002181.1_g020.1.mk/Pav_sc0001124.1_g250.1.mk/Pav_sc0000759.1_g280.1.mk/Pav_sc0002318.1_g420.1.mk	13	13	Pav_sc0000622.1_g050.1.br/Pav_sc0000848.1_g990.1.mk/Pav_sc0001742.1_g030.1.br/Pav_sc0001111.1_g280.1.mk/Pav_sc0001412.1_g370.1.mk/Pav_sc0000855.1_g030.1.mk/Pav_sc0001412.1_g380.1.mk/Pav_sc0000004.1_g040.1.mk/Novel00406/Pav_sc0002181.1_g020.1.mk/Pav_sc0001124.1_g250.1.mk/Pav_sc0000759.1_g280.1.mk/Pav_sc0002318.1_g420.1.mk	0
MF	GO:0022857	transmembrane transporter activity	0.086486	0.538445	Pav_sc0000622.1_g050.1.br/Pav_sc0000848.1_g990.1.mk/Pav_sc0000103.1_g980.1.mk/Pav_sc0001485.1_g080.1.mk/Pav_sc0000554.1_g1910.1.mk/Pav_sc0000493.1_g150.1.mk/Novel00123/Pav_sc0001742.1_g030.1.br/Pav_sc0004467.1_g120.1.mk/Pav_sc0001412.1_g370.1.mk/Pav_sc0001710.1_g310.1.mk/Pav_sc0000591.1_g220.1.mk/Pav_sc0000983.1_g630.1.mk/Novel00406/Pav_sc0004226.1_g050.1.mk/Pav_sc0000497.1_g270.1.mk/Pav_sc000013…	28	25	Pav_sc0000622.1_g050.1.br/Pav_sc0000848.1_g990.1.mk/Pav_sc0000103.1_g980.1.mk/Pav_sc0001485.1_g080.1.mk/Pav_sc0000493.1_g150.1.mk/Novel00123/Pav_sc0001742.1_g030.1.br/Pav_sc0004467.1_g120.1.mk/Pav_sc0001412.1_g370.1.mk/Pav_sc0001710.1_g310.1.mk/Pav_sc0000591.1_g220.1.mk/Pav_sc0000983.1_g630.1.mk/Novel00406/Pav_sc0004226.1_g050.1.mk/Pav_sc0000497.1_g270.1.mk/Pav_sc0000138.1_g1220.1.mk/Pav_sc000448…	3	Pav_sc0000554.1_g1910.1.mk/Pav_sc0000851.1_g080.1.br/Pav_sc0000480.1_g090.1.mk
MF	GO:0016835	carbon-oxygen lyase activity	0.0973844	0.58735	Pav_sc0006050.1_g050.1.mk/Pav_sc0006050.1_g040.1.mk/Pav_sc0001485.1_g060.1.mk/Pav_sc0001545.1_g020.1.mk/Pav_sc0001545.1_g060.1.mk	5	2	Pav_sc0001545.1_g020.1.mk/Pav_sc0001545.1_g060.1.mk	3	Pav_sc0006050.1_g050.1.mk/Pav_sc0006050.1_g040.1.mk/Pav_sc0001485.1_g060.1.mk
MF	GO:0030234	enzyme regulator activity	0.113993	0.631937	Pav_sc0000028.1_g320.1.mk/Pav_sc0000130.1_g870.1.mk/Pav_sc0002233.1_g150.1.mk/Pav_sc0001102.1_g920.1.mk/Pav_sc0000370.1_g030.1.mk/Pav_sc0000893.1_g070.1.mk/Pav_sc0000370.1_g020.1.mk/Pav_sc0000257.1_g1070.1.mk/Pav_sc0004475.1_g020.1.br/Pav_sc0000028.1_g200.1.mk	10	1	Pav_sc0004475.1_g020.1.br	9	Pav_sc0000028.1_g320.1.mk/Pav_sc0000130.1_g870.1.mk/Pav_sc0002233.1_g150.1.mk/Pav_sc0001102.1_g920.1.mk/Pav_sc0000370.1_g030.1.mk/Pav_sc0000893.1_g070.1.mk/Pav_sc0000370.1_g020.1.mk/Pav_sc0000257.1_g1070.1.mk/Pav_sc0000028.1_g200.1.mk
MF	GO:0071949	FAD binding	0.115256	0.631937	Pav_sc0007209.1_g120.1.mk/Pav_sc0000373.1_g670.1.mk/Pav_sc0010552.1_g010.1.mk	3	0		3	Pav_sc0007209.1_g120.1.mk/Pav_sc0000373.1_g670.1.mk/Pav_sc0010552.1_g010.1.mk
MF	GO:0003887	DNA-directed DNA polymerase activity	0.117874	0.631937	Pav_sc0000013.1_g050.1.mk/Pav_sc0000103.1_g1380.1.mk	2	2	Pav_sc0000013.1_g050.1.mk/Pav_sc0000103.1_g1380.1.mk	0
MF	GO:0016157	sucrose synthase activity	0.117874	0.631937	Pav_sc0006188.1_g050.1.mk/Pav_sc0000500.1_g060.1.mk	2	2	Pav_sc0006188.1_g050.1.mk/Pav_sc0000500.1_g060.1.mk	0
MF	GO:0016702	oxidoreductase activity, acting on single donors with incorporation of molecular oxygen, incorporation of two atoms of oxygen	0.133827	0.684112	Pav_sc0000095.1_g1080.1.mk/Pav_sc0000095.1_g1070.1.mk/Pav_sc0000595.1_g490.1.mk/Pav_sc0007611.1_g010.1.mk	4	2	Pav_sc0000095.1_g1080.1.mk/Pav_sc0000095.1_g1070.1.mk	2	Pav_sc0000595.1_g490.1.mk/Pav_sc0007611.1_g010.1.mk
MF	GO:0034061	DNA polymerase activity	0.138557	0.684112	Pav_sc0000013.1_g050.1.mk/Pav_sc0000103.1_g1380.1.mk	2	2	Pav_sc0000013.1_g050.1.mk/Pav_sc0000103.1_g1380.1.mk	0
MF	GO:0042626	ATPase activity, coupled to transmembrane movement of substances	0.141785	0.684112	Pav_sc0000622.1_g050.1.br/Pav_sc0000848.1_g990.1.mk/Pav_sc0001742.1_g030.1.br/Pav_sc0001412.1_g370.1.mk/Novel00406/Pav_sc0002318.1_g420.1.mk	6	6	Pav_sc0000622.1_g050.1.br/Pav_sc0000848.1_g990.1.mk/Pav_sc0001742.1_g030.1.br/Pav_sc0001412.1_g370.1.mk/Novel00406/Pav_sc0002318.1_g420.1.mk	0
MF	GO:0043492	ATPase activity, coupled to movement of substances	0.141785	0.684112	Pav_sc0000622.1_g050.1.br/Pav_sc0000848.1_g990.1.mk/Pav_sc0001742.1_g030.1.br/Pav_sc0001412.1_g370.1.mk/Novel00406/Pav_sc0002318.1_g420.1.mk	6	6	Pav_sc0000622.1_g050.1.br/Pav_sc0000848.1_g990.1.mk/Pav_sc0001742.1_g030.1.br/Pav_sc0001412.1_g370.1.mk/Novel00406/Pav_sc0002318.1_g420.1.mk	0
MF	GO:0051213	dioxygenase activity	0.15635	0.72883	Pav_sc0000095.1_g1080.1.mk/Pav_sc0000095.1_g1070.1.mk/Pav_sc0000595.1_g490.1.mk/Pav_sc0007611.1_g010.1.mk	4	2	Pav_sc0000095.1_g1080.1.mk/Pav_sc0000095.1_g1070.1.mk	2	Pav_sc0000595.1_g490.1.mk/Pav_sc0007611.1_g010.1.mk
MF	GO:0016820	hydrolase activity, acting on acid anhydrides, catalyzing transmembrane movement of substances	0.158605	0.72883	Pav_sc0000622.1_g050.1.br/Pav_sc0000848.1_g990.1.mk/Pav_sc0001742.1_g030.1.br/Pav_sc0001412.1_g370.1.mk/Novel00406/Pav_sc0002318.1_g420.1.mk	6	6	Pav_sc0000622.1_g050.1.br/Pav_sc0000848.1_g990.1.mk/Pav_sc0001742.1_g030.1.br/Pav_sc0001412.1_g370.1.mk/Novel00406/Pav_sc0002318.1_g420.1.mk	0
MF	GO:0098772	molecular function regulator	0.177946	0.789607	Pav_sc0000028.1_g320.1.mk/Pav_sc0000130.1_g870.1.mk/Pav_sc0002233.1_g150.1.mk/Pav_sc0001102.1_g920.1.mk/Pav_sc0000370.1_g030.1.mk/Pav_sc0000893.1_g070.1.mk/Pav_sc0000370.1_g020.1.mk/Pav_sc0000257.1_g1070.1.mk/Pav_sc0004475.1_g020.1.br/Pav_sc0000028.1_g200.1.mk	10	1	Pav_sc0004475.1_g020.1.br	9	Pav_sc0000028.1_g320.1.mk/Pav_sc0000130.1_g870.1.mk/Pav_sc0002233.1_g150.1.mk/Pav_sc0001102.1_g920.1.mk/Pav_sc0000370.1_g030.1.mk/Pav_sc0000893.1_g070.1.mk/Pav_sc0000370.1_g020.1.mk/Pav_sc0000257.1_g1070.1.mk/Pav_sc0000028.1_g200.1.mk
MF	GO:0015399	primary active transmembrane transporter activity	0.185353	0.789607	Pav_sc0000622.1_g050.1.br/Pav_sc0000848.1_g990.1.mk/Pav_sc0001742.1_g030.1.br/Pav_sc0001412.1_g370.1.mk/Novel00406/Pav_sc0002318.1_g420.1.mk	6	6	Pav_sc0000622.1_g050.1.br/Pav_sc0000848.1_g990.1.mk/Pav_sc0001742.1_g030.1.br/Pav_sc0001412.1_g370.1.mk/Novel00406/Pav_sc0002318.1_g420.1.mk	0
MF	GO:0015405	P-P-bond-hydrolysis-driven transmembrane transporter activity	0.185353	0.789607	Pav_sc0000622.1_g050.1.br/Pav_sc0000848.1_g990.1.mk/Pav_sc0001742.1_g030.1.br/Pav_sc0001412.1_g370.1.mk/Novel00406/Pav_sc0002318.1_g420.1.mk	6	6	Pav_sc0000622.1_g050.1.br/Pav_sc0000848.1_g990.1.mk/Pav_sc0001742.1_g030.1.br/Pav_sc0001412.1_g370.1.mk/Novel00406/Pav_sc0002318.1_g420.1.mk	0
MF	GO:0016747	transferase activity, transferring acyl groups other than amino-acyl groups	0.188197	0.789607	Pav_sc0000500.1_g560.1.mk/Pav_sc0000174.1_g320.1.mk/Pav_sc0003326.1_g220.1.mk/Pav_sc0000037.1_g060.1.mk/Pav_sc0000449.1_g490.1.mk/Pav_sc0000791.1_g230.1.br/Pav_sc0000449.1_g480.1.mk/Pav_sc0000071.1_g260.1.br/Pav_sc0000023.1_g070.1.br/Pav_sc0002479.1_g160.1.br/Pav_co4027827.1_g010.1.br	11	7	Pav_sc0000500.1_g560.1.mk/Pav_sc0003326.1_g220.1.mk/Pav_sc0000037.1_g060.1.mk/Pav_sc0000791.1_g230.1.br/Pav_sc0000023.1_g070.1.br/Pav_sc0002479.1_g160.1.br/Pav_co4027827.1_g010.1.br	4	Pav_sc0000174.1_g320.1.mk/Pav_sc0000449.1_g490.1.mk/Pav_sc0000449.1_g480.1.mk/Pav_sc0000071.1_g260.1.br
MF	GO:0015116	sulfate transmembrane transporter activity	0.204208	0.805378	Pav_sc0001710.1_g310.1.mk/Pav_sc0000983.1_g630.1.mk	2	2	Pav_sc0001710.1_g310.1.mk/Pav_sc0000983.1_g630.1.mk	0
MF	GO:1901682	sulfur compound transmembrane transporter activity	0.204208	0.805378	Pav_sc0001710.1_g310.1.mk/Pav_sc0000983.1_g630.1.mk	2	2	Pav_sc0001710.1_g310.1.mk/Pav_sc0000983.1_g630.1.mk	0
MF	GO:0016746	transferase activity, transferring acyl groups	0.204474	0.805378	Pav_sc0000500.1_g560.1.mk/Pav_sc0000174.1_g320.1.mk/Pav_sc0001687.1_g190.1.mk/Pav_sc0012412.1_g010.1.br/Pav_sc0003326.1_g220.1.mk/Pav_sc0000037.1_g060.1.mk/Pav_sc0000449.1_g490.1.mk/Pav_sc0000791.1_g230.1.br/Pav_sc0000449.1_g480.1.mk/Pav_sc0000071.1_g260.1.br/Pav_sc0000023.1_g070.1.br/Pav_sc0002479.1_g160.1.br/Pav_co4027827.1_g010.1.br	13	9	Pav_sc0000500.1_g560.1.mk/Pav_sc0001687.1_g190.1.mk/Pav_sc0012412.1_g010.1.br/Pav_sc0003326.1_g220.1.mk/Pav_sc0000037.1_g060.1.mk/Pav_sc0000791.1_g230.1.br/Pav_sc0000023.1_g070.1.br/Pav_sc0002479.1_g160.1.br/Pav_co4027827.1_g010.1.br	4	Pav_sc0000174.1_g320.1.mk/Pav_sc0000449.1_g490.1.mk/Pav_sc0000449.1_g480.1.mk/Pav_sc0000071.1_g260.1.br
MF	GO:0004568	chitinase activity	0.226816	0.875511	Pav_sc0001792.1_g090.1.mk/Pav_sc0005917.1_g050.1.br	2	0		2	Pav_sc0001792.1_g090.1.mk/Pav_sc0005917.1_g050.1.br
MF	GO:0016701	oxidoreductase activity, acting on single donors with incorporation of molecular oxygen	0.257533	0.974584	Pav_sc0000095.1_g1080.1.mk/Pav_sc0000095.1_g1070.1.mk/Pav_sc0000595.1_g490.1.mk/Pav_sc0007611.1_g010.1.mk	4	2	Pav_sc0000095.1_g1080.1.mk/Pav_sc0000095.1_g1070.1.mk	2	Pav_sc0000595.1_g490.1.mk/Pav_sc0007611.1_g010.1.mk
MF	GO:0003774	motor activity	0.268544	0.996711	Pav_sc0000207.1_g620.1.mk/Pav_sc0000119.1_g720.1.mk/Pav_sc0000130.1_g010.1.mk/Pav_sc0000780.1_g030.1.mk/Pav_sc0003759.1_g070.1.mk	5	3	Pav_sc0000119.1_g720.1.mk/Pav_sc0000780.1_g030.1.mk/Pav_sc0003759.1_g070.1.mk	2	Pav_sc0000207.1_g620.1.mk/Pav_sc0000130.1_g010.1.mk
MF	GO:0015075	ion transmembrane transporter activity	0.287271	0.99998	Pav_sc0000103.1_g980.1.mk/Pav_sc0000554.1_g1910.1.mk/Novel00123/Pav_sc0001710.1_g310.1.mk/Pav_sc0000591.1_g220.1.mk/Pav_sc0000983.1_g630.1.mk/Pav_sc0000497.1_g270.1.mk/Pav_sc0000138.1_g1220.1.mk/Pav_sc0004485.1_g090.1.mk/Pav_sc0000396.1_g040.1.mk/Pav_sc0000851.1_g080.1.br/Pav_sc0000704.1_g260.1.mk/Pav_sc0000480.1_g090.1.mk/Pav_sc0001709.1_g030.1.mk/Pav_sc0002318.1_g420.1.mk	15	12	Pav_sc0000103.1_g980.1.mk/Novel00123/Pav_sc0001710.1_g310.1.mk/Pav_sc0000591.1_g220.1.mk/Pav_sc0000983.1_g630.1.mk/Pav_sc0000497.1_g270.1.mk/Pav_sc0000138.1_g1220.1.mk/Pav_sc0004485.1_g090.1.mk/Pav_sc0000396.1_g040.1.mk/Pav_sc0000704.1_g260.1.mk/Pav_sc0001709.1_g030.1.mk/Pav_sc0002318.1_g420.1.mk	3	Pav_sc0000554.1_g1910.1.mk/Pav_sc0000851.1_g080.1.br/Pav_sc0000480.1_g090.1.mk
MF	GO:0017111	nucleoside-triphosphatase activity	0.288788	0.99998	Pav_sc0000622.1_g050.1.br/Pav_sc0000848.1_g990.1.mk/Pav_sc0001742.1_g030.1.br/Pav_sc0002722.1_g240.1.br/Pav_sc0001111.1_g280.1.mk/Pav_sc0001412.1_g370.1.mk/Pav_sc0000855.1_g030.1.mk/Pav_sc0000207.1_g620.1.mk/Pav_sc0006598.1_g010.1.mk/Pav_sc0001412.1_g380.1.mk/Pav_sc0000004.1_g040.1.mk/Novel00406/Pav_sc0002181.1_g020.1.mk/Pav_sc0001057.1_g430.1.br/Pav_sc0001057.1_g490.1.br/Pav_sc0000119.1_g720.1.m…	24	20	Pav_sc0000622.1_g050.1.br/Pav_sc0000848.1_g990.1.mk/Pav_sc0001742.1_g030.1.br/Pav_sc0002722.1_g240.1.br/Pav_sc0001111.1_g280.1.mk/Pav_sc0001412.1_g370.1.mk/Pav_sc0000855.1_g030.1.mk/Pav_sc0001412.1_g380.1.mk/Pav_sc0000004.1_g040.1.mk/Novel00406/Pav_sc0002181.1_g020.1.mk/Pav_sc0001057.1_g430.1.br/Pav_sc0001057.1_g490.1.br/Pav_sc0000119.1_g720.1.mk/Pav_sc0000766.1_g250.1.mk/Pav_sc0001124.1_g250.1.m…	4	Pav_sc0000207.1_g620.1.mk/Pav_sc0006598.1_g010.1.mk/Pav_sc0000103.1_g630.1.mk/Pav_sc0000130.1_g010.1.mk
MF	GO:0043565	sequence-specific DNA binding	0.296149	0.99998	Pav_sc0001479.1_g200.1.mk/Pav_sc0001582.1_g320.1.mk/Pav_sc0002318.1_g190.1.mk/Pav_sc0007634.1_g010.1.mk/Novel00046/Pav_sc0001338.1_g320.1.mk/Pav_sc0000759.1_g400.1.mk/Pav_sc0000055.1_g320.1.mk	8	6	Pav_sc0001582.1_g320.1.mk/Pav_sc0002318.1_g190.1.mk/Pav_sc0007634.1_g010.1.mk/Novel00046/Pav_sc0001338.1_g320.1.mk/Pav_sc0000759.1_g400.1.mk	2	Pav_sc0001479.1_g200.1.mk/Pav_sc0000055.1_g320.1.mk
MF	GO:0016462	pyrophosphatase activity	0.299337	0.99998	Pav_sc0000622.1_g050.1.br/Pav_sc0000848.1_g990.1.mk/Pav_sc0001742.1_g030.1.br/Pav_sc0002722.1_g240.1.br/Pav_sc0001111.1_g280.1.mk/Pav_sc0001412.1_g370.1.mk/Pav_sc0000855.1_g030.1.mk/Pav_sc0000207.1_g620.1.mk/Pav_sc0006598.1_g010.1.mk/Pav_sc0001412.1_g380.1.mk/Pav_sc0000004.1_g040.1.mk/Novel00406/Pav_sc0002181.1_g020.1.mk/Pav_sc0001057.1_g430.1.br/Pav_sc0001057.1_g490.1.br/Pav_sc0000119.1_g720.1.m…	25	21	Pav_sc0000622.1_g050.1.br/Pav_sc0000848.1_g990.1.mk/Pav_sc0001742.1_g030.1.br/Pav_sc0002722.1_g240.1.br/Pav_sc0001111.1_g280.1.mk/Pav_sc0001412.1_g370.1.mk/Pav_sc0000855.1_g030.1.mk/Pav_sc0001412.1_g380.1.mk/Pav_sc0000004.1_g040.1.mk/Novel00406/Pav_sc0002181.1_g020.1.mk/Pav_sc0001057.1_g430.1.br/Pav_sc0001057.1_g490.1.br/Pav_sc0000119.1_g720.1.mk/Pav_sc0000766.1_g250.1.mk/Pav_sc0000119.1_g650.1.m…	4	Pav_sc0000207.1_g620.1.mk/Pav_sc0006598.1_g010.1.mk/Pav_sc0000103.1_g630.1.mk/Pav_sc0000130.1_g010.1.mk
MF	GO:0022891	substrate-specific transmembrane transporter activity	0.305979	0.99998	Pav_sc0000103.1_g980.1.mk/Pav_sc0000554.1_g1910.1.mk/Novel00123/Pav_sc0001710.1_g310.1.mk/Pav_sc0000591.1_g220.1.mk/Pav_sc0000983.1_g630.1.mk/Pav_sc0000497.1_g270.1.mk/Pav_sc0000138.1_g1220.1.mk/Pav_sc0004485.1_g090.1.mk/Pav_sc0000396.1_g040.1.mk/Pav_sc0000851.1_g080.1.br/Pav_sc0000704.1_g260.1.mk/Pav_sc0000480.1_g090.1.mk/Pav_sc0001709.1_g030.1.mk/Pav_sc0002318.1_g420.1.mk	15	12	Pav_sc0000103.1_g980.1.mk/Novel00123/Pav_sc0001710.1_g310.1.mk/Pav_sc0000591.1_g220.1.mk/Pav_sc0000983.1_g630.1.mk/Pav_sc0000497.1_g270.1.mk/Pav_sc0000138.1_g1220.1.mk/Pav_sc0004485.1_g090.1.mk/Pav_sc0000396.1_g040.1.mk/Pav_sc0000704.1_g260.1.mk/Pav_sc0001709.1_g030.1.mk/Pav_sc0002318.1_g420.1.mk	3	Pav_sc0000554.1_g1910.1.mk/Pav_sc0000851.1_g080.1.br/Pav_sc0000480.1_g090.1.mk
MF	GO:0016818	hydrolase activity, acting on acid anhydrides, in phosphorus-containing anhydrides	0.318539	0.99998	Pav_sc0000622.1_g050.1.br/Pav_sc0000848.1_g990.1.mk/Pav_sc0001742.1_g030.1.br/Pav_sc0002722.1_g240.1.br/Pav_sc0001111.1_g280.1.mk/Pav_sc0001412.1_g370.1.mk/Pav_sc0000855.1_g030.1.mk/Pav_sc0000207.1_g620.1.mk/Pav_sc0006598.1_g010.1.mk/Pav_sc0001412.1_g380.1.mk/Pav_sc0000004.1_g040.1.mk/Novel00406/Pav_sc0002181.1_g020.1.mk/Pav_sc0001057.1_g430.1.br/Pav_sc0001057.1_g490.1.br/Pav_sc0000119.1_g720.1.m…	25	21	Pav_sc0000622.1_g050.1.br/Pav_sc0000848.1_g990.1.mk/Pav_sc0001742.1_g030.1.br/Pav_sc0002722.1_g240.1.br/Pav_sc0001111.1_g280.1.mk/Pav_sc0001412.1_g370.1.mk/Pav_sc0000855.1_g030.1.mk/Pav_sc0001412.1_g380.1.mk/Pav_sc0000004.1_g040.1.mk/Novel00406/Pav_sc0002181.1_g020.1.mk/Pav_sc0001057.1_g430.1.br/Pav_sc0001057.1_g490.1.br/Pav_sc0000119.1_g720.1.mk/Pav_sc0000766.1_g250.1.mk/Pav_sc0000119.1_g650.1.m…	4	Pav_sc0000207.1_g620.1.mk/Pav_sc0006598.1_g010.1.mk/Pav_sc0000103.1_g630.1.mk/Pav_sc0000130.1_g010.1.mk
MF	GO:0030599	pectinesterase activity	0.318638	0.99998	Pav_sc0000130.1_g870.1.mk/Pav_sc0000257.1_g1070.1.mk/Pav_sc0004475.1_g020.1.br	3	1	Pav_sc0004475.1_g020.1.br	2	Pav_sc0000130.1_g870.1.mk/Pav_sc0000257.1_g1070.1.mk
MF	GO:0042623	ATPase activity, coupled	0.327555	0.99998	Pav_sc0000622.1_g050.1.br/Pav_sc0000848.1_g990.1.mk/Pav_sc0001742.1_g030.1.br/Pav_sc0001412.1_g370.1.mk/Novel00406/Pav_sc0002318.1_g420.1.mk	6	6	Pav_sc0000622.1_g050.1.br/Pav_sc0000848.1_g990.1.mk/Pav_sc0001742.1_g030.1.br/Pav_sc0001412.1_g370.1.mk/Novel00406/Pav_sc0002318.1_g420.1.mk	0
MF	GO:0016817	hydrolase activity, acting on acid anhydrides	0.347997	0.99998	Pav_sc0000622.1_g050.1.br/Pav_sc0000848.1_g990.1.mk/Pav_sc0001742.1_g030.1.br/Pav_sc0002722.1_g240.1.br/Pav_sc0001111.1_g280.1.mk/Pav_sc0001412.1_g370.1.mk/Pav_sc0000855.1_g030.1.mk/Pav_sc0000207.1_g620.1.mk/Pav_sc0006598.1_g010.1.mk/Pav_sc0001412.1_g380.1.mk/Pav_sc0000004.1_g040.1.mk/Novel00406/Pav_sc0002181.1_g020.1.mk/Pav_sc0001057.1_g430.1.br/Pav_sc0001057.1_g490.1.br/Pav_sc0000119.1_g720.1.m…	25	21	Pav_sc0000622.1_g050.1.br/Pav_sc0000848.1_g990.1.mk/Pav_sc0001742.1_g030.1.br/Pav_sc0002722.1_g240.1.br/Pav_sc0001111.1_g280.1.mk/Pav_sc0001412.1_g370.1.mk/Pav_sc0000855.1_g030.1.mk/Pav_sc0001412.1_g380.1.mk/Pav_sc0000004.1_g040.1.mk/Novel00406/Pav_sc0002181.1_g020.1.mk/Pav_sc0001057.1_g430.1.br/Pav_sc0001057.1_g490.1.br/Pav_sc0000119.1_g720.1.mk/Pav_sc0000766.1_g250.1.mk/Pav_sc0000119.1_g650.1.m…	4	Pav_sc0000207.1_g620.1.mk/Pav_sc0006598.1_g010.1.mk/Pav_sc0000103.1_g630.1.mk/Pav_sc0000130.1_g010.1.mk
MF	GO:0003777	microtubule motor activity	0.353946	0.99998	Pav_sc0000119.1_g720.1.mk/Pav_sc0000130.1_g010.1.mk/Pav_sc0000780.1_g030.1.mk/Pav_sc0003759.1_g070.1.mk	4	3	Pav_sc0000119.1_g720.1.mk/Pav_sc0000780.1_g030.1.mk/Pav_sc0003759.1_g070.1.mk	1	Pav_sc0000130.1_g010.1.mk
MF	GO:0015238	drug transmembrane transporter activity	0.38564	0.99998	Pav_sc0000493.1_g150.1.mk/Pav_sc0000257.1_g490.1.br/Pav_sc0001073.1_g080.1.mk	3	3	Pav_sc0000493.1_g150.1.mk/Pav_sc0000257.1_g490.1.br/Pav_sc0001073.1_g080.1.mk	0
MF	GO:0090484	drug transporter activity	0.38564	0.99998	Pav_sc0000493.1_g150.1.mk/Pav_sc0000257.1_g490.1.br/Pav_sc0001073.1_g080.1.mk	3	3	Pav_sc0000493.1_g150.1.mk/Pav_sc0000257.1_g490.1.br/Pav_sc0001073.1_g080.1.mk	0
MF	GO:0022804	active transmembrane transporter activity	0.389163	0.99998	Pav_sc0000622.1_g050.1.br/Pav_sc0000848.1_g990.1.mk/Pav_sc0000493.1_g150.1.mk/Pav_sc0001742.1_g030.1.br/Pav_sc0001412.1_g370.1.mk/Novel00406/Pav_sc0000257.1_g490.1.br/Pav_sc0001073.1_g080.1.mk/Pav_sc0002318.1_g420.1.mk	9	9	Pav_sc0000622.1_g050.1.br/Pav_sc0000848.1_g990.1.mk/Pav_sc0000493.1_g150.1.mk/Pav_sc0001742.1_g030.1.br/Pav_sc0001412.1_g370.1.mk/Novel00406/Pav_sc0000257.1_g490.1.br/Pav_sc0001073.1_g080.1.mk/Pav_sc0002318.1_g420.1.mk	0
MF	GO:0022892	substrate-specific transporter activity	0.396873	0.99998	Pav_sc0000103.1_g980.1.mk/Pav_sc0000554.1_g1910.1.mk/Novel00123/Pav_sc0001710.1_g310.1.mk/Pav_sc0000591.1_g220.1.mk/Pav_sc0000983.1_g630.1.mk/Pav_sc0000497.1_g270.1.mk/Pav_sc0000138.1_g1220.1.mk/Pav_sc0004485.1_g090.1.mk/Pav_sc0000396.1_g040.1.mk/Pav_sc0000851.1_g080.1.br/Pav_sc0000704.1_g260.1.mk/Pav_sc0000480.1_g090.1.mk/Pav_sc0001709.1_g030.1.mk/Pav_sc0002318.1_g420.1.mk	15	12	Pav_sc0000103.1_g980.1.mk/Novel00123/Pav_sc0001710.1_g310.1.mk/Pav_sc0000591.1_g220.1.mk/Pav_sc0000983.1_g630.1.mk/Pav_sc0000497.1_g270.1.mk/Pav_sc0000138.1_g1220.1.mk/Pav_sc0004485.1_g090.1.mk/Pav_sc0000396.1_g040.1.mk/Pav_sc0000704.1_g260.1.mk/Pav_sc0001709.1_g030.1.mk/Pav_sc0002318.1_g420.1.mk	3	Pav_sc0000554.1_g1910.1.mk/Pav_sc0000851.1_g080.1.br/Pav_sc0000480.1_g090.1.mk
MF	GO:0016829	lyase activity	0.405451	0.99998	Pav_sc0006050.1_g050.1.mk/Pav_sc0006050.1_g040.1.mk/Pav_sc0001485.1_g060.1.mk/Pav_sc0006100.1_g030.1.mk/Pav_sc0001545.1_g020.1.mk/Pav_sc0001545.1_g060.1.mk/Pav_sc0000044.1_g840.1.mk	7	4	Pav_sc0006100.1_g030.1.mk/Pav_sc0001545.1_g020.1.mk/Pav_sc0001545.1_g060.1.mk/Pav_sc0000044.1_g840.1.mk	3	Pav_sc0006050.1_g050.1.mk/Pav_sc0006050.1_g040.1.mk/Pav_sc0001485.1_g060.1.mk
MF	GO:0033926	glycopeptide alpha-N-acetylgalactosaminidase activity	0.462183	0.99998	Pav_sc0000909.1_g290.1.br	1	1	Pav_sc0000909.1_g290.1.br	0
MF	GO:0016879	ligase activity, forming carbon-nitrogen bonds	0.468937	0.99998	Pav_sc0000419.1_g100.1.mk/Pav_sc0000568.1_g560.1.mk	2	1	Pav_sc0000419.1_g100.1.mk	1	Pav_sc0000568.1_g560.1.mk
MF	GO:0046983	protein dimerization activity	0.480025	0.99998	Pav_sc0002584.1_g370.1.mk/Pav_sc0001313.1_g380.1.mk/Pav_sc0001817.1_g050.1.mk/Pav_sc0000624.1_g1350.1.mk/Pav_sc0000652.1_g730.1.mk/Pav_sc0001710.1_g1500.1.mk/Pav_sc0000820.1_g020.1.mk/Pav_sc0001309.1_g720.1.mk/Pav_sc0000700.1_g590.1.mk/Pav_sc0000502.1_g710.1.mk/Pav_sc0000378.1_g110.1.br/Pav_sc0001107.1_g090.1.mk/Pav_sc0000373.1_g1010.1.mk/Pav_sc0000269.1_g380.1.mk	14	10	Pav_sc0001313.1_g380.1.mk/Pav_sc0000624.1_g1350.1.mk/Pav_sc0000652.1_g730.1.mk/Pav_sc0001710.1_g1500.1.mk/Pav_sc0001309.1_g720.1.mk/Pav_sc0000502.1_g710.1.mk/Pav_sc0000378.1_g110.1.br/Pav_sc0001107.1_g090.1.mk/Pav_sc0000373.1_g1010.1.mk/Pav_sc0000269.1_g380.1.mk	4	Pav_sc0002584.1_g370.1.mk/Pav_sc0001817.1_g050.1.mk/Pav_sc0000820.1_g020.1.mk/Pav_sc0000700.1_g590.1.mk
MF	GO:0015103	inorganic anion transmembrane transporter activity	0.488912	0.99998	Pav_sc0001710.1_g310.1.mk/Pav_sc0000983.1_g630.1.mk	2	2	Pav_sc0001710.1_g310.1.mk/Pav_sc0000983.1_g630.1.mk	0
MF	GO:0052689	carboxylic ester hydrolase activity	0.490563	0.99998	Pav_sc0010253.1_g030.1.mk/Pav_sc0000130.1_g870.1.mk/Pav_sc0000257.1_g1070.1.mk/Pav_sc0004475.1_g020.1.br	4	2	Pav_sc0010253.1_g030.1.mk/Pav_sc0004475.1_g020.1.br	2	Pav_sc0000130.1_g870.1.mk/Pav_sc0000257.1_g1070.1.mk
MF	GO:0005544	calcium-dependent phospholipid binding	0.494545	0.99998	Pav_sc0000817.1_g120.1.mk	1	1	Pav_sc0000817.1_g120.1.mk	0
MF	GO:0016762	xyloglucan:xyloglucosyl transferase activity	0.494545	0.99998	Pav_sc0000480.1_g990.1.mk	1	0		1	Pav_sc0000480.1_g990.1.mk
MF	GO:0050660	flavin adenine dinucleotide binding	0.496191	0.99998	Pav_sc0007209.1_g120.1.mk/Pav_sc0002208.1_g430.1.mk/Pav_sc0000729.1_g240.1.br/Pav_sc0000373.1_g670.1.mk/Pav_sc0010552.1_g010.1.mk	5	2	Pav_sc0002208.1_g430.1.mk/Pav_sc0000729.1_g240.1.br	3	Pav_sc0007209.1_g120.1.mk/Pav_sc0000373.1_g670.1.mk/Pav_sc0010552.1_g010.1.mk
MF	GO:0016645	oxidoreductase activity, acting on the CH-NH group of donors	0.524964	0.99998	Pav_sc0002208.1_g430.1.mk	1	1	Pav_sc0002208.1_g430.1.mk	0
MF	GO:1901681	sulfur compound binding	0.524964	0.99998	Pav_sc0000037.1_g120.1.mk	1	0		1	Pav_sc0000037.1_g120.1.mk
MF	GO:0016758	transferase activity, transferring hexosyl groups	0.534121	0.99998	Pav_sc0000480.1_g990.1.mk/Pav_sc0000613.1_g050.1.mk/Pav_sc0001090.1_g120.1.mk/Pav_sc0006188.1_g050.1.mk/Pav_sc0000500.1_g060.1.mk/Pav_sc0001126.1_g230.1.br/Pav_sc0000691.1_g800.1.br/Pav_sc0000691.1_g790.1.br/Pav_sc0000023.1_g400.1.mk/Pav_sc0000359.1_g230.1.mk/Pav_sc0000638.1_g210.1.mk/Pav_sc0011987.1_g020.1.mk/Pav_sc0000030.1_g1050.1.mk/Pav_sc0001663.1_g200.1.br	14	10	Pav_sc0000613.1_g050.1.mk/Pav_sc0001090.1_g120.1.mk/Pav_sc0006188.1_g050.1.mk/Pav_sc0000500.1_g060.1.mk/Pav_sc0001126.1_g230.1.br/Pav_sc0000691.1_g800.1.br/Pav_sc0000691.1_g790.1.br/Pav_sc0000359.1_g230.1.mk/Pav_sc0000638.1_g210.1.mk/Pav_sc0001663.1_g200.1.br	4	Pav_sc0000480.1_g990.1.mk/Pav_sc0000023.1_g400.1.mk/Pav_sc0011987.1_g020.1.mk/Pav_sc0000030.1_g1050.1.mk
MF	GO:0004743	pyruvate kinase activity	0.553555	0.99998	Pav_sc0000659.1_g440.1.mk	1	0		1	Pav_sc0000659.1_g440.1.mk
MF	GO:0008536	Ran GTPase binding	0.553555	0.99998	Pav_sc0001925.1_g010.1.mk	1	0		1	Pav_sc0001925.1_g010.1.mk
MF	GO:0016651	oxidoreductase activity, acting on NAD(P)H	0.553555	0.99998	Pav_sc0000886.1_g850.1.mk	1	1	Pav_sc0000886.1_g850.1.mk	0
MF	GO:0016903	oxidoreductase activity, acting on the aldehyde or oxo group of donors	0.553555	0.99998	Pav_sc0001461.1_g070.1.mk	1	1	Pav_sc0001461.1_g070.1.mk	0
MF	GO:0017016	Ras GTPase binding	0.553555	0.99998	Pav_sc0001925.1_g010.1.mk	1	0		1	Pav_sc0001925.1_g010.1.mk
MF	GO:0030955	potassium ion binding	0.553555	0.99998	Pav_sc0000659.1_g440.1.mk	1	0		1	Pav_sc0000659.1_g440.1.mk
MF	GO:0031267	small GTPase binding	0.553555	0.99998	Pav_sc0001925.1_g010.1.mk	1	0		1	Pav_sc0001925.1_g010.1.mk
MF	GO:0031420	alkali metal ion binding	0.553555	0.99998	Pav_sc0000659.1_g440.1.mk	1	0		1	Pav_sc0000659.1_g440.1.mk
MF	GO:0051020	GTPase binding	0.553555	0.99998	Pav_sc0001925.1_g010.1.mk	1	0		1	Pav_sc0001925.1_g010.1.mk
MF	GO:0004674	protein serine/threonine kinase activity	0.563903	0.99998	Novel00130/Pav_sc0005562.1_g010.1.br	2	2	Novel00130/Pav_sc0005562.1_g010.1.br	0
MF	GO:0005509	calcium ion binding	0.56881	0.99998	Pav_sc0000484.1_g710.1.mk/Pav_sc0000348.1_g1020.1.mk/Pav_sc0002444.1_g020.1.mk/Pav_sc0000817.1_g120.1.mk/Pav_sc0000071.1_g810.1.mk/Pav_sc0000440.1_g200.1.mk/Pav_sc0000030.1_g1040.1.mk/Pav_sc0004485.1_g010.1.mk	8	7	Pav_sc0000484.1_g710.1.mk/Pav_sc0000348.1_g1020.1.mk/Pav_sc0000817.1_g120.1.mk/Pav_sc0000071.1_g810.1.mk/Pav_sc0000440.1_g200.1.mk/Pav_sc0000030.1_g1040.1.mk/Pav_sc0004485.1_g010.1.mk	1	Pav_sc0002444.1_g020.1.mk
MF	GO:0008017	microtubule binding	0.578749	0.99998	Pav_sc0000119.1_g720.1.mk/Pav_sc0000130.1_g010.1.mk/Pav_sc0000780.1_g030.1.mk/Pav_sc0003759.1_g070.1.mk	4	3	Pav_sc0000119.1_g720.1.mk/Pav_sc0000780.1_g030.1.mk/Pav_sc0003759.1_g070.1.mk	1	Pav_sc0000130.1_g010.1.mk
MF	GO:0002161	aminoacyl-tRNA editing activity	0.580428	0.99998	Pav_sc0010253.1_g030.1.mk	1	1	Pav_sc0010253.1_g030.1.mk	0
MF	GO:0030983	mismatched DNA binding	0.605686	0.99998	Pav_sc0009684.1_g010.1.mk	1	1	Pav_sc0009684.1_g010.1.mk	0
MF	GO:0008080	N-acetyltransferase activity	0.630665	0.99998	Pav_sc0000449.1_g490.1.mk/Pav_sc0000449.1_g480.1.mk	2	0		2	Pav_sc0000449.1_g490.1.mk/Pav_sc0000449.1_g480.1.mk
MF	GO:0016410	N-acyltransferase activity	0.646058	0.99998	Pav_sc0000449.1_g490.1.mk/Pav_sc0000449.1_g480.1.mk	2	0		2	Pav_sc0000449.1_g490.1.mk/Pav_sc0000449.1_g480.1.mk
MF	GO:0005516	calmodulin binding	0.651738	0.99998	Pav_sc0000383.1_g180.1.mk	1	1	Pav_sc0000383.1_g180.1.mk	0
MF	GO:0008378	galactosyltransferase activity	0.651738	0.99998	Pav_sc0000359.1_g230.1.mk	1	1	Pav_sc0000359.1_g230.1.mk	0
MF	GO:0015079	potassium ion transmembrane transporter activity	0.651738	0.99998	Pav_sc0000103.1_g980.1.mk	1	1	Pav_sc0000103.1_g980.1.mk	0
MF	GO:0016860	intramolecular oxidoreductase activity	0.651738	0.99998	Pav_sc0003135.1_g310.1.mk	1	0		1	Pav_sc0003135.1_g310.1.mk
MF	GO:0015631	tubulin binding	0.667969	0.99998	Pav_sc0000119.1_g720.1.mk/Pav_sc0000130.1_g010.1.mk/Pav_sc0000780.1_g030.1.mk/Pav_sc0003759.1_g070.1.mk	4	3	Pav_sc0000119.1_g720.1.mk/Pav_sc0000780.1_g030.1.mk/Pav_sc0003759.1_g070.1.mk	1	Pav_sc0000130.1_g010.1.mk
MF	GO:0008408	3'-5' exonuclease activity	0.67271	0.99998	Pav_sc0000013.1_g050.1.mk	1	1	Pav_sc0000013.1_g050.1.mk	0
MF	GO:0016798	hydrolase activity, acting on glycosyl bonds	0.674662	0.99998	Pav_sc0000480.1_g990.1.mk/Pav_sc0000212.1_g420.1.mk/Pav_sc0000130.1_g860.1.mk/Pav_sc0001792.1_g090.1.mk/Pav_sc0005215.1_g030.1.mk/Pav_sc0000558.1_g320.1.mk/Pav_sc0000909.1_g290.1.br/Pav_sc0005917.1_g050.1.br/Pav_sc0000736.1_g390.1.mk/Pav_sc0000009.1_g240.1.mk/Pav_sc0000582.1_g630.1.mk/Pav_sc0012345.1_g010.1.br/Pav_sc0003279.1_g030.1.mk	13	7	Pav_sc0005215.1_g030.1.mk/Pav_sc0000558.1_g320.1.mk/Pav_sc0000909.1_g290.1.br/Pav_sc0000736.1_g390.1.mk/Pav_sc0000582.1_g630.1.mk/Pav_sc0012345.1_g010.1.br/Pav_sc0003279.1_g030.1.mk	6	Pav_sc0000480.1_g990.1.mk/Pav_sc0000212.1_g420.1.mk/Pav_sc0000130.1_g860.1.mk/Pav_sc0001792.1_g090.1.mk/Pav_sc0005917.1_g050.1.br/Pav_sc0000009.1_g240.1.mk
MF	GO:0019842	vitamin binding	0.686032	0.99998	Pav_sc0000037.1_g120.1.mk/Pav_sc0000243.1_g170.1.mk/Pav_sc0000886.1_g690.1.mk	3	2	Pav_sc0000243.1_g170.1.mk/Pav_sc0000886.1_g690.1.mk	1	Pav_sc0000037.1_g120.1.mk
MF	GO:0016407	acetyltransferase activity	0.689189	0.99998	Pav_sc0000449.1_g490.1.mk/Pav_sc0000449.1_g480.1.mk	2	0		2	Pav_sc0000449.1_g490.1.mk/Pav_sc0000449.1_g480.1.mk
MF	GO:0004650	polygalacturonase activity	0.692421	0.99998	Pav_sc0000009.1_g240.1.mk	1	0		1	Pav_sc0000009.1_g240.1.mk
MF	GO:0004888	transmembrane signaling receptor activity	0.692421	0.99998	Novel00123	1	1	Novel00123	0
MF	GO:0004970	ionotropic glutamate receptor activity	0.692421	0.99998	Novel00123	1	1	Novel00123	0
MF	GO:0005230	extracellular ligand-gated ion channel activity	0.692421	0.99998	Novel00123	1	1	Novel00123	0
MF	GO:0008066	glutamate receptor activity	0.692421	0.99998	Novel00123	1	1	Novel00123	0
MF	GO:0015276	ligand-gated ion channel activity	0.692421	0.99998	Novel00123	1	1	Novel00123	0
MF	GO:0022824	transmitter-gated ion channel activity	0.692421	0.99998	Novel00123	1	1	Novel00123	0
MF	GO:0022834	ligand-gated channel activity	0.692421	0.99998	Novel00123	1	1	Novel00123	0
MF	GO:0022835	transmitter-gated channel activity	0.692421	0.99998	Novel00123	1	1	Novel00123	0
MF	GO:0030594	neurotransmitter receptor activity	0.692421	0.99998	Novel00123	1	1	Novel00123	0
MF	GO:0099600	transmembrane receptor activity	0.692421	0.99998	Novel00123	1	1	Novel00123	0
MF	GO:0004553	hydrolase activity, hydrolyzing O-glycosyl compounds	0.702202	0.99998	Pav_sc0000480.1_g990.1.mk/Pav_sc0000212.1_g420.1.mk/Pav_sc0000130.1_g860.1.mk/Pav_sc0001792.1_g090.1.mk/Pav_sc0005215.1_g030.1.mk/Pav_sc0000558.1_g320.1.mk/Pav_sc0000909.1_g290.1.br/Pav_sc0005917.1_g050.1.br/Pav_sc0000009.1_g240.1.mk/Pav_sc0000582.1_g630.1.mk/Pav_sc0012345.1_g010.1.br/Pav_sc0003279.1_g030.1.mk	12	6	Pav_sc0005215.1_g030.1.mk/Pav_sc0000558.1_g320.1.mk/Pav_sc0000909.1_g290.1.br/Pav_sc0000582.1_g630.1.mk/Pav_sc0012345.1_g010.1.br/Pav_sc0003279.1_g030.1.mk	6	Pav_sc0000480.1_g990.1.mk/Pav_sc0000212.1_g420.1.mk/Pav_sc0000130.1_g860.1.mk/Pav_sc0001792.1_g090.1.mk/Pav_sc0005917.1_g050.1.br/Pav_sc0000009.1_g240.1.mk
MF	GO:0015297	antiporter activity	0.708088	0.99998	Pav_sc0000493.1_g150.1.mk/Pav_sc0000257.1_g490.1.br/Pav_sc0001073.1_g080.1.mk	3	3	Pav_sc0000493.1_g150.1.mk/Pav_sc0000257.1_g490.1.br/Pav_sc0001073.1_g080.1.mk	0
MF	GO:0008092	cytoskeletal protein binding	0.717928	0.99998	Pav_sc0001539.1_g190.1.mk/Pav_sc0000119.1_g720.1.mk/Pav_sc0000130.1_g010.1.mk/Pav_sc0000780.1_g030.1.mk/Pav_sc0003759.1_g070.1.mk	5	4	Pav_sc0001539.1_g190.1.mk/Pav_sc0000119.1_g720.1.mk/Pav_sc0000780.1_g030.1.mk/Pav_sc0003759.1_g070.1.mk	1	Pav_sc0000130.1_g010.1.mk
MF	GO:0004842	ubiquitin-protein transferase activity	0.718663	0.99998	Pav_sc0000040.1_g1010.1.mk/Pav_sc0001364.1_g030.1.mk/Pav_sc0003072.1_g100.1.mk	3	3	Pav_sc0000040.1_g1010.1.mk/Pav_sc0001364.1_g030.1.mk/Pav_sc0003072.1_g100.1.mk	0
MF	GO:0019787	ubiquitin-like protein transferase activity	0.718663	0.99998	Pav_sc0000040.1_g1010.1.mk/Pav_sc0001364.1_g030.1.mk/Pav_sc0003072.1_g100.1.mk	3	3	Pav_sc0000040.1_g1010.1.mk/Pav_sc0001364.1_g030.1.mk/Pav_sc0003072.1_g100.1.mk	0
MF	GO:0008324	cation transmembrane transporter activity	0.7207	0.99998	Pav_sc0000103.1_g980.1.mk/Pav_sc0000554.1_g1910.1.mk/Pav_sc0000497.1_g270.1.mk/Pav_sc0000396.1_g040.1.mk/Pav_sc0001709.1_g030.1.mk/Pav_sc0002318.1_g420.1.mk	6	5	Pav_sc0000103.1_g980.1.mk/Pav_sc0000497.1_g270.1.mk/Pav_sc0000396.1_g040.1.mk/Pav_sc0001709.1_g030.1.mk/Pav_sc0002318.1_g420.1.mk	1	Pav_sc0000554.1_g1910.1.mk
MF	GO:0008237	metallopeptidase activity	0.727903	0.99998	Pav_sc0000689.1_g490.1.mk/Pav_sc0010177.1_g010.1.br	2	1	Pav_sc0010177.1_g010.1.br	1	Pav_sc0000689.1_g490.1.mk
MF	GO:0004527	exonuclease activity	0.744723	0.99998	Pav_sc0000013.1_g050.1.mk	1	1	Pav_sc0000013.1_g050.1.mk	0
MF	GO:0015291	secondary active transmembrane transporter activity	0.757996	0.99998	Pav_sc0000493.1_g150.1.mk/Pav_sc0000257.1_g490.1.br/Pav_sc0001073.1_g080.1.mk	3	3	Pav_sc0000493.1_g150.1.mk/Pav_sc0000257.1_g490.1.br/Pav_sc0001073.1_g080.1.mk	0
MF	GO:0016875	ligase activity, forming carbon-oxygen bonds	0.757996	0.99998	Pav_sc0012316.1_g010.1.mk/Pav_sc0000329.1_g020.1.mk/Pav_sc0005193.1_g060.1.mk	3	1	Pav_sc0000329.1_g020.1.mk	2	Pav_sc0012316.1_g010.1.mk/Pav_sc0005193.1_g060.1.mk
MF	GO:0016876	ligase activity, forming aminoacyl-tRNA and related compounds	0.757996	0.99998	Pav_sc0012316.1_g010.1.mk/Pav_sc0000329.1_g020.1.mk/Pav_sc0005193.1_g060.1.mk	3	1	Pav_sc0000329.1_g020.1.mk	2	Pav_sc0012316.1_g010.1.mk/Pav_sc0005193.1_g060.1.mk
MF	GO:0008509	anion transmembrane transporter activity	0.762454	0.99998	Pav_sc0001710.1_g310.1.mk/Pav_sc0000983.1_g630.1.mk	2	2	Pav_sc0001710.1_g310.1.mk/Pav_sc0000983.1_g630.1.mk	0
MF	GO:0035251	UDP-glucosyltransferase activity	0.762454	0.99998	Pav_sc0006188.1_g050.1.mk/Pav_sc0000500.1_g060.1.mk	2	2	Pav_sc0006188.1_g050.1.mk/Pav_sc0000500.1_g060.1.mk	0
MF	GO:0004871	signal transducer activity	0.773096	0.99998	Pav_sc0000983.1_g380.1.mk/Novel00123	2	1	Novel00123	1	Pav_sc0000983.1_g380.1.mk
MF	GO:0046527	glucosyltransferase activity	0.773096	0.99998	Pav_sc0006188.1_g050.1.mk/Pav_sc0000500.1_g060.1.mk	2	2	Pav_sc0006188.1_g050.1.mk/Pav_sc0000500.1_g060.1.mk	0
MF	GO:0003779	actin binding	0.774559	0.99998	Pav_sc0001539.1_g190.1.mk	1	1	Pav_sc0001539.1_g190.1.mk	0
MF	GO:0016791	phosphatase activity	0.783319	0.99998	Novel00643/Pav_sc0001797.1_g620.1.mk	2	1	Pav_sc0001797.1_g620.1.mk	1	Novel00643
MF	GO:0030170	pyridoxal phosphate binding	0.783319	0.99998	Pav_sc0000243.1_g170.1.mk/Pav_sc0000886.1_g690.1.mk	2	2	Pav_sc0000243.1_g170.1.mk/Pav_sc0000886.1_g690.1.mk	0
MF	GO:0070279	vitamin B6 binding	0.783319	0.99998	Pav_sc0000243.1_g170.1.mk/Pav_sc0000886.1_g690.1.mk	2	2	Pav_sc0000243.1_g170.1.mk/Pav_sc0000886.1_g690.1.mk	0
MF	GO:0003743	translation initiation factor activity	0.788144	0.99998	Pav_sc0000296.1_g100.1.mk	1	0		1	Pav_sc0000296.1_g100.1.mk
MF	GO:0005543	phospholipid binding	0.788144	0.99998	Pav_sc0000817.1_g120.1.mk	1	1	Pav_sc0000817.1_g120.1.mk	0
MF	GO:0019899	enzyme binding	0.812913	0.99998	Pav_sc0001925.1_g010.1.mk	1	0		1	Pav_sc0001925.1_g010.1.mk
MF	GO:0022836	gated channel activity	0.812913	0.99998	Novel00123	1	1	Novel00123	0
MF	GO:0016779	nucleotidyltransferase activity	0.83096	0.99998	Pav_sc0000013.1_g050.1.mk/Pav_sc0000103.1_g1380.1.mk/Pav_co4067545.1_g010.1.br/Pav_sc0000893.1_g280.1.mk	4	3	Pav_sc0000013.1_g050.1.mk/Pav_sc0000103.1_g1380.1.mk/Pav_co4067545.1_g010.1.br	1	Pav_sc0000893.1_g280.1.mk
MF	GO:0016757	transferase activity, transferring glycosyl groups	0.831028	0.99998	Pav_sc0000480.1_g990.1.mk/Pav_sc0000613.1_g050.1.mk/Pav_sc0001090.1_g120.1.mk/Pav_sc0006188.1_g050.1.mk/Pav_sc0000500.1_g060.1.mk/Pav_sc0001126.1_g230.1.br/Pav_sc0000691.1_g800.1.br/Pav_sc0000691.1_g790.1.br/Pav_sc0000023.1_g400.1.mk/Pav_sc0000359.1_g230.1.mk/Pav_sc0000638.1_g210.1.mk/Pav_sc0011987.1_g020.1.mk/Pav_sc0000030.1_g1050.1.mk/Pav_sc0001663.1_g200.1.br	14	10	Pav_sc0000613.1_g050.1.mk/Pav_sc0001090.1_g120.1.mk/Pav_sc0006188.1_g050.1.mk/Pav_sc0000500.1_g060.1.mk/Pav_sc0001126.1_g230.1.br/Pav_sc0000691.1_g800.1.br/Pav_sc0000691.1_g790.1.br/Pav_sc0000359.1_g230.1.mk/Pav_sc0000638.1_g210.1.mk/Pav_sc0001663.1_g200.1.br	4	Pav_sc0000480.1_g990.1.mk/Pav_sc0000023.1_g400.1.mk/Pav_sc0011987.1_g020.1.mk/Pav_sc0000030.1_g1050.1.mk
MF	GO:0008168	methyltransferase activity	0.831126	0.99998	Pav_sc0002360.1_g070.1.mk/Pav_sc0001575.1_g070.1.mk/Pav_sc0000103.1_g310.1.br/Pav_sc0005572.1_g010.1.br/Novel00439/Pav_sc0000503.1_g330.1.mk/Pav_sc0000373.1_g1010.1.mk	7	6	Pav_sc0001575.1_g070.1.mk/Pav_sc0000103.1_g310.1.br/Pav_sc0005572.1_g010.1.br/Novel00439/Pav_sc0000503.1_g330.1.mk/Pav_sc0000373.1_g1010.1.mk	1	Pav_sc0002360.1_g070.1.mk
MF	GO:0034062	5'-3' RNA polymerase activity	0.836539	0.99998	Pav_co4067545.1_g010.1.br/Pav_sc0000893.1_g280.1.mk	2	1	Pav_co4067545.1_g010.1.br	1	Pav_sc0000893.1_g280.1.mk
MF	GO:0097747	RNA polymerase activity	0.836539	0.99998	Pav_co4067545.1_g010.1.br/Pav_sc0000893.1_g280.1.mk	2	1	Pav_co4067545.1_g010.1.br	1	Pav_sc0000893.1_g280.1.mk
MF	GO:0016874	ligase activity	0.840025	0.99998	Pav_sc0000419.1_g100.1.mk/Pav_sc0012316.1_g010.1.mk/Pav_sc0000329.1_g020.1.mk/Pav_sc0000568.1_g560.1.mk/Pav_sc0005193.1_g060.1.mk	5	2	Pav_sc0000419.1_g100.1.mk/Pav_sc0000329.1_g020.1.mk	3	Pav_sc0012316.1_g010.1.mk/Pav_sc0000568.1_g560.1.mk/Pav_sc0005193.1_g060.1.mk
MF	GO:0016627	oxidoreductase activity, acting on the CH-CH group of donors	0.854113	0.99998	Pav_sc0002207.1_g400.1.mk	1	1	Pav_sc0002207.1_g400.1.mk	0
MF	GO:0038023	signaling receptor activity	0.854113	0.99998	Novel00123	1	1	Novel00123	0
MF	GO:0016741	transferase activity, transferring one-carbon groups	0.862649	0.99998	Pav_sc0002360.1_g070.1.mk/Pav_sc0001575.1_g070.1.mk/Pav_sc0000103.1_g310.1.br/Pav_sc0005572.1_g010.1.br/Novel00439/Pav_sc0000503.1_g330.1.mk/Pav_sc0000373.1_g1010.1.mk	7	6	Pav_sc0001575.1_g070.1.mk/Pav_sc0000103.1_g310.1.br/Pav_sc0005572.1_g010.1.br/Novel00439/Pav_sc0000503.1_g330.1.mk/Pav_sc0000373.1_g1010.1.mk	1	Pav_sc0002360.1_g070.1.mk
MF	GO:0004872	receptor activity	0.862911	0.99998	Novel00123	1	1	Novel00123	0
MF	GO:0060089	molecular transducer activity	0.862911	0.99998	Novel00123	1	1	Novel00123	0
MF	GO:0003924	GTPase activity	0.869587	0.99998	Pav_sc0002722.1_g240.1.br/Pav_sc0001057.1_g430.1.br/Pav_sc0001057.1_g490.1.br/Pav_sc0000103.1_g630.1.mk/Pav_sc0000766.1_g250.1.mk	5	4	Pav_sc0002722.1_g240.1.br/Pav_sc0001057.1_g430.1.br/Pav_sc0001057.1_g490.1.br/Pav_sc0000766.1_g250.1.mk	1	Pav_sc0000103.1_g630.1.mk
MF	GO:0050662	coenzyme binding	0.87072	0.99998	Pav_sc0000037.1_g120.1.mk/Pav_sc0007209.1_g120.1.mk/Pav_sc0002208.1_g430.1.mk/Pav_sc0000729.1_g240.1.br/Pav_sc0000373.1_g670.1.mk/Pav_sc0010552.1_g010.1.mk/Pav_sc0000407.1_g210.1.mk	7	3	Pav_sc0002208.1_g430.1.mk/Pav_sc0000729.1_g240.1.br/Pav_sc0000407.1_g210.1.mk	4	Pav_sc0000037.1_g120.1.mk/Pav_sc0007209.1_g120.1.mk/Pav_sc0000373.1_g670.1.mk/Pav_sc0010552.1_g010.1.mk
MF	GO:0004222	metalloendopeptidase activity	0.871179	0.99998	Pav_sc0010177.1_g010.1.br	1	1	Pav_sc0010177.1_g010.1.br	0
MF	GO:0005507	copper ion binding	0.871179	0.99998	Pav_sc0006478.1_g020.1.mk	1	1	Pav_sc0006478.1_g020.1.mk	0
MF	GO:0004252	serine-type endopeptidase activity	0.871542	0.99998	Pav_sc0006658.1_g010.1.mk/Pav_sc0000175.1_g550.1.mk	2	1	Pav_sc0000175.1_g550.1.mk	1	Pav_sc0006658.1_g010.1.mk
MF	GO:0016788	hydrolase activity, acting on ester bonds	0.880554	0.99998	Pav_sc0010253.1_g030.1.mk/Novel00643/Pav_sc0000130.1_g870.1.mk/Pav_sc0000013.1_g050.1.mk/Pav_sc0001797.1_g620.1.mk/Pav_sc0000015.1_g100.1.mk/Pav_sc0000257.1_g1070.1.mk/Pav_sc0000314.1_g160.1.mk/Pav_sc0004475.1_g020.1.br/Pav_sc0000370.1_g460.1.br/Pav_sc0000898.1_g020.1.br/Pav_sc0002893.1_g270.1.br	12	5	Pav_sc0010253.1_g030.1.mk/Pav_sc0000013.1_g050.1.mk/Pav_sc0001797.1_g620.1.mk/Pav_sc0000314.1_g160.1.mk/Pav_sc0004475.1_g020.1.br	7	Novel00643/Pav_sc0000130.1_g870.1.mk/Pav_sc0000015.1_g100.1.mk/Pav_sc0000257.1_g1070.1.mk/Pav_sc0000370.1_g460.1.br/Pav_sc0000898.1_g020.1.br/Pav_sc0002893.1_g270.1.br
MF	GO:0016853	isomerase activity	0.887937	0.99998	Pav_sc0007703.1_g010.1.mk/Pav_sc0003135.1_g310.1.mk/Pav_sc0007510.1_g020.1.mk/Pav_sc0000618.1_g380.1.mk	4	2	Pav_sc0007703.1_g010.1.mk/Pav_sc0000618.1_g380.1.mk	2	Pav_sc0003135.1_g310.1.mk/Pav_sc0007510.1_g020.1.mk
MF	GO:0004812	aminoacyl-tRNA ligase activity	0.889094	0.99998	Pav_sc0012316.1_g010.1.mk/Pav_sc0005193.1_g060.1.mk	2	0		2	Pav_sc0012316.1_g010.1.mk/Pav_sc0005193.1_g060.1.mk
MF	GO:0016614	oxidoreductase activity, acting on CH-OH group of donors	0.892175	0.99998	Pav_sc0002208.1_g430.1.mk/Pav_sc0000729.1_g240.1.br/Pav_co4055217.1_g010.1.mk/Novel00069	4	4	Pav_sc0002208.1_g430.1.mk/Pav_sc0000729.1_g240.1.br/Pav_co4055217.1_g010.1.mk/Novel00069	0
MF	GO:0016667	oxidoreductase activity, acting on a sulfur group of donors	0.893114	0.99998	Pav_sc0003135.1_g310.1.mk	1	0		1	Pav_sc0003135.1_g310.1.mk
MF	GO:0016830	carbon-carbon lyase activity	0.893114	0.99998	Pav_sc0000044.1_g840.1.mk	1	1	Pav_sc0000044.1_g840.1.mk	0
MF	GO:0004386	helicase activity	0.905625	0.99998	Pav_sc0006598.1_g010.1.mk	1	0		1	Pav_sc0006598.1_g010.1.mk
MF	GO:0015077	monovalent inorganic cation transmembrane transporter activity	0.909048	0.99998	Pav_sc0000103.1_g980.1.mk/Pav_sc0002318.1_g420.1.mk	2	2	Pav_sc0000103.1_g980.1.mk/Pav_sc0002318.1_g420.1.mk	0
MF	GO:0008135	translation factor activity, RNA binding	0.930871	0.99998	Pav_sc0000296.1_g100.1.mk	1	0		1	Pav_sc0000296.1_g100.1.mk
MF	GO:0016616	oxidoreductase activity, acting on the CH-OH group of donors, NAD or NADP as acceptor	0.939288	0.99998	Pav_co4055217.1_g010.1.mk/Novel00069	2	2	Pav_co4055217.1_g010.1.mk/Novel00069	0
MF	GO:0042578	phosphoric ester hydrolase activity	0.939288	0.99998	Novel00643/Pav_sc0001797.1_g620.1.mk	2	1	Pav_sc0001797.1_g620.1.mk	1	Novel00643
MF	GO:0003899	DNA-directed 5'-3' RNA polymerase activity	0.942654	0.99998	Pav_co4067545.1_g010.1.br	1	1	Pav_co4067545.1_g010.1.br	0
MF	GO:0015078	hydrogen ion transmembrane transporter activity	0.949373	0.99998	Pav_sc0002318.1_g420.1.mk	1	1	Pav_sc0002318.1_g420.1.mk	0
MF	GO:0046873	metal ion transmembrane transporter activity	0.949373	0.99998	Pav_sc0000103.1_g980.1.mk	1	1	Pav_sc0000103.1_g980.1.mk	0
MF	GO:0051536	iron-sulfur cluster binding	0.952432	0.99998	Pav_sc0002234.1_g060.1.mk	1	1	Pav_sc0002234.1_g060.1.mk	0
MF	GO:0051540	metal cluster binding	0.952432	0.99998	Pav_sc0002234.1_g060.1.mk	1	1	Pav_sc0002234.1_g060.1.mk	0
MF	GO:0008194	UDP-glycosyltransferase activity	0.953051	0.99998	Pav_sc0006188.1_g050.1.mk/Pav_sc0000500.1_g060.1.mk	2	2	Pav_sc0006188.1_g050.1.mk/Pav_sc0000500.1_g060.1.mk	0
MF	GO:0048037	cofactor binding	0.953711	0.99998	Pav_sc0000037.1_g120.1.mk/Pav_sc0007209.1_g120.1.mk/Pav_sc0002208.1_g430.1.mk/Pav_sc0000729.1_g240.1.br/Pav_sc0000373.1_g670.1.mk/Pav_sc0010552.1_g010.1.mk/Pav_sc0000407.1_g210.1.mk/Pav_sc0000243.1_g170.1.mk/Pav_sc0000886.1_g690.1.mk	9	5	Pav_sc0002208.1_g430.1.mk/Pav_sc0000729.1_g240.1.br/Pav_sc0000407.1_g210.1.mk/Pav_sc0000243.1_g170.1.mk/Pav_sc0000886.1_g690.1.mk	4	Pav_sc0000037.1_g120.1.mk/Pav_sc0007209.1_g120.1.mk/Pav_sc0000373.1_g670.1.mk/Pav_sc0010552.1_g010.1.mk
MF	GO:0001883	purine nucleoside binding	0.963501	0.99998	Pav_sc0000568.1_g560.1.mk/Pav_sc0002722.1_g240.1.br/Pav_sc0001807.1_g160.1.mk/Pav_sc0001057.1_g430.1.br/Pav_sc0001057.1_g490.1.br	5	4	Pav_sc0002722.1_g240.1.br/Pav_sc0001807.1_g160.1.mk/Pav_sc0001057.1_g430.1.br/Pav_sc0001057.1_g490.1.br	1	Pav_sc0000568.1_g560.1.mk
MF	GO:0005525	GTP binding	0.963501	0.99998	Pav_sc0000568.1_g560.1.mk/Pav_sc0002722.1_g240.1.br/Pav_sc0001807.1_g160.1.mk/Pav_sc0001057.1_g430.1.br/Pav_sc0001057.1_g490.1.br	5	4	Pav_sc0002722.1_g240.1.br/Pav_sc0001807.1_g160.1.mk/Pav_sc0001057.1_g430.1.br/Pav_sc0001057.1_g490.1.br	1	Pav_sc0000568.1_g560.1.mk
MF	GO:0032549	ribonucleoside binding	0.963501	0.99998	Pav_sc0000568.1_g560.1.mk/Pav_sc0002722.1_g240.1.br/Pav_sc0001807.1_g160.1.mk/Pav_sc0001057.1_g430.1.br/Pav_sc0001057.1_g490.1.br	5	4	Pav_sc0002722.1_g240.1.br/Pav_sc0001807.1_g160.1.mk/Pav_sc0001057.1_g430.1.br/Pav_sc0001057.1_g490.1.br	1	Pav_sc0000568.1_g560.1.mk
MF	GO:0032550	purine ribonucleoside binding	0.963501	0.99998	Pav_sc0000568.1_g560.1.mk/Pav_sc0002722.1_g240.1.br/Pav_sc0001807.1_g160.1.mk/Pav_sc0001057.1_g430.1.br/Pav_sc0001057.1_g490.1.br	5	4	Pav_sc0002722.1_g240.1.br/Pav_sc0001807.1_g160.1.mk/Pav_sc0001057.1_g430.1.br/Pav_sc0001057.1_g490.1.br	1	Pav_sc0000568.1_g560.1.mk
MF	GO:0032561	guanyl ribonucleotide binding	0.963501	0.99998	Pav_sc0000568.1_g560.1.mk/Pav_sc0002722.1_g240.1.br/Pav_sc0001807.1_g160.1.mk/Pav_sc0001057.1_g430.1.br/Pav_sc0001057.1_g490.1.br	5	4	Pav_sc0002722.1_g240.1.br/Pav_sc0001807.1_g160.1.mk/Pav_sc0001057.1_g430.1.br/Pav_sc0001057.1_g490.1.br	1	Pav_sc0000568.1_g560.1.mk
MF	GO:0001882	nucleoside binding	0.964933	0.99998	Pav_sc0000568.1_g560.1.mk/Pav_sc0002722.1_g240.1.br/Pav_sc0001807.1_g160.1.mk/Pav_sc0001057.1_g430.1.br/Pav_sc0001057.1_g490.1.br	5	4	Pav_sc0002722.1_g240.1.br/Pav_sc0001807.1_g160.1.mk/Pav_sc0001057.1_g430.1.br/Pav_sc0001057.1_g490.1.br	1	Pav_sc0000568.1_g560.1.mk
MF	GO:0008289	lipid binding	0.967275	0.99998	Pav_sc0000817.1_g120.1.mk	1	1	Pav_sc0000817.1_g120.1.mk	0
MF	GO:0003690	double-stranded DNA binding	0.969254	0.99998	Pav_sc0009684.1_g010.1.mk	1	1	Pav_sc0009684.1_g010.1.mk	0
MF	GO:0019001	guanyl nucleotide binding	0.970158	0.99998	Pav_sc0000568.1_g560.1.mk/Pav_sc0002722.1_g240.1.br/Pav_sc0001807.1_g160.1.mk/Pav_sc0001057.1_g430.1.br/Pav_sc0001057.1_g490.1.br	5	4	Pav_sc0002722.1_g240.1.br/Pav_sc0001807.1_g160.1.mk/Pav_sc0001057.1_g430.1.br/Pav_sc0001057.1_g490.1.br	1	Pav_sc0000568.1_g560.1.mk
MF	GO:0004175	endopeptidase activity	0.972475	0.99998	Pav_sc0006658.1_g010.1.mk/Pav_sc0000175.1_g550.1.mk/Pav_sc0010177.1_g010.1.br	3	2	Pav_sc0000175.1_g550.1.mk/Pav_sc0010177.1_g010.1.br	1	Pav_sc0006658.1_g010.1.mk
MF	GO:0008236	serine-type peptidase activity	0.980818	0.99998	Pav_sc0006658.1_g010.1.mk/Pav_sc0000175.1_g550.1.mk	2	1	Pav_sc0000175.1_g550.1.mk	1	Pav_sc0006658.1_g010.1.mk
MF	GO:0017171	serine hydrolase activity	0.980818	0.99998	Pav_sc0006658.1_g010.1.mk/Pav_sc0000175.1_g550.1.mk	2	1	Pav_sc0000175.1_g550.1.mk	1	Pav_sc0006658.1_g010.1.mk
MF	GO:0022890	inorganic cation transmembrane transporter activity	0.981818	0.99998	Pav_sc0000103.1_g980.1.mk/Pav_sc0002318.1_g420.1.mk	2	2	Pav_sc0000103.1_g980.1.mk/Pav_sc0002318.1_g420.1.mk	0
MF	GO:0004518	nuclease activity	0.982465	0.99998	Pav_sc0000013.1_g050.1.mk	1	1	Pav_sc0000013.1_g050.1.mk	0
MF	GO:0009055	electron carrier activity	0.989361	0.99998	Pav_sc0000754.1_g240.1.mk	1	1	Pav_sc0000754.1_g240.1.mk	0
MF	GO:0008234	cysteine-type peptidase activity	0.991714	0.99998	Pav_sc0000037.1_g200.1.mk	1	1	Pav_sc0000037.1_g200.1.mk	0
MF	GO:0008233	peptidase activity	0.995295	0.99998	Pav_sc0000370.1_g370.1.mk/Pav_sc0006658.1_g010.1.mk/Pav_sc0000689.1_g490.1.mk/Pav_sc0000175.1_g550.1.mk/Pav_sc0010177.1_g010.1.br/Pav_sc0000037.1_g200.1.mk/Pav_sc0000691.1_g580.1.mk	7	4	Pav_sc0000370.1_g370.1.mk/Pav_sc0000175.1_g550.1.mk/Pav_sc0010177.1_g010.1.br/Pav_sc0000037.1_g200.1.mk	3	Pav_sc0006658.1_g010.1.mk/Pav_sc0000689.1_g490.1.mk/Pav_sc0000691.1_g580.1.mk
MF	GO:0008270	zinc ion binding	0.99847	0.99998	Pav_sc0000598.1_g150.1.mk/Novel00079/Pav_sc0000293.1_g410.1.mk/Pav_sc0000013.1_g050.1.mk/Pav_sc0003054.1_g200.1.mk/Pav_sc0000449.1_g340.1.mk/Pav_sc0000689.1_g490.1.mk/Pav_sc0002475.1_g100.1.mk/Pav_sc0000759.1_g400.1.mk/Pav_sc0000055.1_g320.1.mk	10	4	Pav_sc0000293.1_g410.1.mk/Pav_sc0000013.1_g050.1.mk/Pav_sc0002475.1_g100.1.mk/Pav_sc0000759.1_g400.1.mk	6	Pav_sc0000598.1_g150.1.mk/Novel00079/Pav_sc0003054.1_g200.1.mk/Pav_sc0000449.1_g340.1.mk/Pav_sc0000689.1_g490.1.mk/Pav_sc0000055.1_g320.1.mk
MF	GO:0070011	peptidase activity, acting on L-amino acid peptides	0.999336	0.99998	Pav_sc0006658.1_g010.1.mk/Pav_sc0000689.1_g490.1.mk/Pav_sc0000175.1_g550.1.mk/Pav_sc0010177.1_g010.1.br/Pav_sc0000037.1_g200.1.mk	5	3	Pav_sc0000175.1_g550.1.mk/Pav_sc0010177.1_g010.1.br/Pav_sc0000037.1_g200.1.mk	2	Pav_sc0006658.1_g010.1.mk/Pav_sc0000689.1_g490.1.mk
MF	GO:0003735	structural constituent of ribosome	0.999949	0.99998	Pav_sc0010469.1_g010.1.mk/Pav_sc0000040.1_g200.1.br	2	0		2	Pav_sc0010469.1_g010.1.mk/Pav_sc0000040.1_g200.1.br
MF	GO:0005198	structural molecule activity	0.999975	0.99998	Pav_sc0010469.1_g010.1.mk/Pav_sc0000040.1_g200.1.br	2	0		2	Pav_sc0010469.1_g010.1.mk/Pav_sc0000040.1_g200.1.br
MF	GO:0003723	RNA binding	0.99998	0.99998	Pav_sc0000296.1_g100.1.mk/Pav_sc0000582.1_g640.1.mk/Pav_sc0006727.1_g020.1.br	3	1	Pav_sc0000582.1_g640.1.mk	2	Pav_sc0000296.1_g100.1.mk/Pav_sc0006727.1_g020.1.br
BP: Biological Process
CC: Cellular Component
p-value: Statistical significance test index
padj: The corrected p-value
