# Supplementary material for: Transcriptomic analysis reveals insights into the response to Hop stunt viroid (HSVd) in sweet cherry (Prunus avium L.) fruits
Source: PeerJ. 2020 Sep 21;8:e10005. doi: 10.7717/peerj.10005 (PMC7513744; doi:10.7717/peerj.10005)
Supplement: Supplemental Information 4 — KEGG: Kyoto Encyclopedia of Genes and Genomes; p-value: Statistical significance test index; padj: The corrected p-value [file peerj-08-10005-s004.xls]

## Sheet: S4
Table S4. Differentially expressed genes in the KEGG pathways.
KEGG ID	Description	p-value	padj	geneID	kegg ID	Count	Up	Up_Gene_names	Down	Down_Gene_names
pper04075	Plant hormone signal transduction	2.07e-05	0.0014496	Pav_sc0002858.1_g200.1.mk/Pav_sc0000752.1_g150.1.br/Pav_sc0000983.1_g260.1.mk/Pav_sc0000044.1_g680.1.br/Pav_sc0001580.1_g140.1.mk/Pav_sc0000480.1_g730.1.mk/Pav_co4041309.1_g010.1.br/Pav_sc0005603.1_g090.1.br/Pav_sc0002056.1_g070.1.br/Pav_sc0000269.1_g440.1.mk/Pav_sc0001583.1_g270.1.br/Novel00046/Pav_sc0000752.1_g170.1.br/Pav_sc0000030.1_g1280.1.mk/Pav_sc0002080.1_g160.1.mk/Pav_sc0000752.1_g190.1.…	pper:18772600/pper:18766543/pper:18768141/pper:18769935/pper:18782132/pper:18774629/pper:18773117/pper:18767226/pper:18767058/pper:18781401/pper:18780615/pper:18789576/pper:18766351/pper:18789560/pper:18792758/pper:18767763/pper:18793348/pper:18789144	18	12	Pav_sc0002858.1_g200.1.mk/Pav_sc0000044.1_g680.1.br/Pav_sc0001580.1_g140.1.mk/Pav_co4041309.1_g010.1.br/Pav_sc0005603.1_g090.1.br/Pav_sc0002056.1_g070.1.br/Pav_sc0000269.1_g440.1.mk/Pav_sc0001583.1_g270.1.br/Novel00046/Pav_sc0000030.1_g1280.1.mk/Pav_sc0002080.1_g160.1.mk/Pav_sc0002080.1_g130.1.br	6	Pav_sc0000752.1_g150.1.br/Pav_sc0000983.1_g260.1.mk/Pav_sc0000480.1_g730.1.mk/Pav_sc0000752.1_g170.1.br/Pav_sc0000752.1_g190.1.br/Pav_sc0000555.1_g070.1.mk
pper00941	Flavonoid biosynthesis	0.00152662	0.0534316	Pav_sc0007510.1_g020.1.mk/Pav_sc0000030.1_g1340.1.mk/Pav_sc0000045.1_g280.1.mk/Pav_sc0003326.1_g220.1.mk/Pav_sc0001196.1_g1100.1.mk	pper:18786520/pper:18788410/pper:18789485/pper:18783187/pper:18792412	5	4	Pav_sc0000030.1_g1340.1.mk/Pav_sc0000045.1_g280.1.mk/Pav_sc0003326.1_g220.1.mk/Pav_sc0001196.1_g1100.1.mk	1	Pav_sc0007510.1_g020.1.mk
pper00940	Phenylpropanoid biosynthesis	0.00545801	0.127353	Pav_sc0000017.1_g020.1.mk/Pav_sc0000729.1_g240.1.br/Pav_co4071347.1_g010.1.mk/Pav_sc0000028.1_g820.1.mk/Pav_sc0003326.1_g220.1.mk/Pav_sc0001196.1_g1100.1.mk/Pav_sc0000099.1_g130.1.mk/Pav_sc0001323.1_g1090.1.mk	pper:18780810/pper:18778395/pper:18772065/pper:18790191/pper:18783187/pper:18792412/pper:18771351/pper:18793937	8	7	Pav_sc0000729.1_g240.1.br/Pav_co4071347.1_g010.1.mk/Pav_sc0000028.1_g820.1.mk/Pav_sc0003326.1_g220.1.mk/Pav_sc0001196.1_g1100.1.mk/Pav_sc0000099.1_g130.1.mk/Pav_sc0001323.1_g1090.1.mk	1	Pav_sc0000017.1_g020.1.mk
pper00905	Brassinosteroid biosynthesis	0.0121153	0.212018	Pav_sc0001580.1_g300.1.mk/Pav_sc0000143.1_g650.1.mk/Pav_sc0001191.1_g210.1.mk	pper:18783701/pper:18785088/pper:18791316	3	2	Pav_sc0001580.1_g300.1.mk/Pav_sc0000143.1_g650.1.mk	1	Pav_sc0001191.1_g210.1.mk
pper04626	Plant-pathogen interaction	0.0274852	0.384793	Pav_sc0001524.1_g050.1.mk/Pav_sc0000484.1_g710.1.mk/Pav_sc0000138.1_g1220.1.mk/Pav_sc0000886.1_g850.1.mk/Pav_sc0000348.1_g1020.1.mk/Pav_sc0000071.1_g810.1.mk/Pav_sc0000440.1_g200.1.mk/Pav_sc0000480.1_g090.1.mk/Pav_sc0001911.1_g560.1.mk	pper:18773879/pper:18783606/pper:18785575/pper:18775913/pper:18769696/pper:18770769/pper:18769609/pper:18772975/pper:18776703	9	7	Pav_sc0000484.1_g710.1.mk/Pav_sc0000138.1_g1220.1.mk/Pav_sc0000886.1_g850.1.mk/Pav_sc0000348.1_g1020.1.mk/Pav_sc0000071.1_g810.1.mk/Pav_sc0000440.1_g200.1.mk/Pav_sc0001911.1_g560.1.mk	2	Pav_sc0001524.1_g050.1.mk/Pav_sc0000480.1_g090.1.mk
pper00910	Nitrogen metabolism	0.0630582	0.659357	Pav_sc0002234.1_g060.1.mk/Pav_sc0000096.1_g190.1.mk/Pav_sc0000024.1_g160.1.mk	pper:18767486/pper:18769150/pper:18779995	3	3	Pav_sc0002234.1_g060.1.mk/Pav_sc0000096.1_g190.1.mk/Pav_sc0000024.1_g160.1.mk	0
pper04016	MAPK signaling pathway - plant	0.0659357	0.659357	Pav_sc0002858.1_g200.1.mk/Pav_co4041309.1_g010.1.br/Pav_sc0000599.1_g120.1.mk/Pav_sc0001077.1_g280.1.mk/Pav_sc0000484.1_g710.1.mk/Pav_sc0000886.1_g850.1.mk/Pav_sc0000886.1_g690.1.mk	pper:18772600/pper:18773117/pper:18777714/pper:18781947/pper:18783606/pper:18775913/pper:18775762	7	7	Pav_sc0002858.1_g200.1.mk/Pav_co4041309.1_g010.1.br/Pav_sc0000599.1_g120.1.mk/Pav_sc0001077.1_g280.1.mk/Pav_sc0000484.1_g710.1.mk/Pav_sc0000886.1_g850.1.mk/Pav_sc0000886.1_g690.1.mk	0
pper01040	Biosynthesis of unsaturated fatty acids	0.112027	0.966979	Pav_sc0002842.1_g150.1.mk/Pav_sc0002207.1_g400.1.mk	pper:18767537/pper:18769254	2	1	Pav_sc0002207.1_g400.1.mk	1	Pav_sc0002842.1_g150.1.mk
pper00730	Thiamine metabolism	0.13814	0.966979	Pav_sc0002106.1_g300.1.mk/Pav_sc0002181.1_g120.1.mk	pper:18793273/pper:18767389	2	1	Pav_sc0002181.1_g120.1.mk	1	Pav_sc0002106.1_g300.1.mk
pper00950	Isoquinoline alkaloid biosynthesis	0.13814	0.966979	Pav_sc0002009.1_g170.1.mk/Pav_sc0002009.1_g120.1.mk	pper:18781346/pper:18781299	2	2	Pav_sc0002009.1_g170.1.mk/Pav_sc0002009.1_g120.1.mk	0
pper00040	Pentose and glucuronate interconversions	0.153736	0.978319	Pav_sc0000130.1_g870.1.mk/Pav_sc0000747.1_g130.1.mk/Pav_sc0000257.1_g1070.1.mk/Pav_sc0000009.1_g240.1.mk	pper:18767106/pper:18788873/pper:18793253/pper:18782466	4	1	Pav_sc0000747.1_g130.1.mk	3	Pav_sc0000130.1_g870.1.mk/Pav_sc0000257.1_g1070.1.mk/Pav_sc0000009.1_g240.1.mk
pper00240	Pyrimidine metabolism	0.250877	0.980711	Pav_sc0000419.1_g100.1.mk/Pav_sc0000661.1_g040.1.mk/Pav_sc0000119.1_g650.1.mk	pper:18780192/pper:18782219/pper:18792420	3	3	Pav_sc0000419.1_g100.1.mk/Pav_sc0000661.1_g040.1.mk/Pav_sc0000119.1_g650.1.mk	0
pper04712	Circadian rhythm - plant	0.251182	0.980711	Pav_sc0000045.1_g280.1.mk/Pav_co4051015.1_g010.1.mk	pper:18789485/pper:18772119	2	2	Pav_sc0000045.1_g280.1.mk/Pav_co4051015.1_g010.1.mk	0
pper00906	Carotenoid biosynthesis	0.265726	0.980711	Pav_sc0000095.1_g1070.1.mk/Pav_sc0000563.1_g270.1.mk	pper:18780753/pper:18771933	2	2	Pav_sc0000095.1_g1070.1.mk/Pav_sc0000563.1_g270.1.mk	0
pper00360	Phenylalanine metabolism	0.280272	0.980711	Pav_sc0000373.1_g020.1.mk/Pav_co4071347.1_g010.1.mk	pper:18766761/pper:18772065	2	1	Pav_co4071347.1_g010.1.mk	1	Pav_sc0000373.1_g020.1.mk
pper00710	Carbon fixation in photosynthetic organisms	0.32555	0.980711	Pav_sc0000672.1_g110.1.mk/Pav_sc0001461.1_g070.1.mk/Pav_sc0000044.1_g840.1.mk	pper:18780697/pper:18776538/pper:18769483	3	3	Pav_sc0000672.1_g110.1.mk/Pav_sc0001461.1_g070.1.mk/Pav_sc0000044.1_g840.1.mk	0
pper00514	Other types of O-glycan biosynthesis	0.325945	0.980711	Pav_sc0000486.1_g100.1.br	pper:18777290	1	1	Pav_sc0000486.1_g100.1.br	0
pper00270	Cysteine and methionine metabolism	0.328791	0.980711	Novel00190/Pav_sc0001938.1_g280.1.mk/Pav_sc0001084.1_g100.1.mk/Pav_sc0000886.1_g690.1.mk	pper:18788092/pper:18772177/pper:18781368/pper:18775762	4	3	Pav_sc0001938.1_g280.1.mk/Pav_sc0001084.1_g100.1.mk/Pav_sc0000886.1_g690.1.mk	1	Novel00190
pper00350	Tyrosine metabolism	0.338066	0.980711	Pav_sc0002009.1_g170.1.mk/Pav_sc0002009.1_g120.1.mk	pper:18781346/pper:18781299	2	2	Pav_sc0002009.1_g170.1.mk/Pav_sc0002009.1_g120.1.mk	0
pper00750	Vitamin B6 metabolism	0.377168	0.980711	Pav_sc0001797.1_g620.1.mk	pper:18783733	1	1	Pav_sc0001797.1_g620.1.mk	0
pper00250	Alanine, aspartate and glutamate metabolism	0.394434	0.980711	Pav_sc0000009.1_g410.1.mk/Pav_sc0000568.1_g560.1.mk	pper:18783016/pper:18768320	2	1	Pav_sc0000009.1_g410.1.mk	1	Pav_sc0000568.1_g560.1.mk
pper00073	Cutin, suberine and wax biosynthesis	0.401312	0.980711	Pav_sc0000220.1_g1040.1.mk	pper:18789925	1	1	Pav_sc0000220.1_g1040.1.mk	0
pper00592	alpha-Linolenic acid metabolism	0.421819	0.980711	Pav_sc0002207.1_g400.1.mk/Pav_sc0000103.1_g420.1.mk	pper:18769254/pper:18777310	2	1	Pav_sc0002207.1_g400.1.mk	1	Pav_sc0000103.1_g420.1.mk
pper00196	Photosynthesis - antenna proteins	0.424527	0.980711	Pav_sc0001289.1_g560.1.mk	pper:18778652	1	0		1	Pav_sc0001289.1_g560.1.mk
pper00071	Fatty acid degradation	0.448565	0.980711	Pav_sc0000220.1_g1040.1.mk/Pav_sc0002207.1_g400.1.mk	pper:18789925/pper:18769254	2	2	Pav_sc0000220.1_g1040.1.mk/Pav_sc0002207.1_g400.1.mk	0
pper00564	Glycerophospholipid metabolism	0.452471	0.980711	Pav_sc0000103.1_g660.1.mk/Pav_sc0000907.1_g860.1.mk/Pav_sc0001687.1_g190.1.mk	pper:18775666/pper:18775315/pper:18774839	3	3	Pav_sc0000103.1_g660.1.mk/Pav_sc0000907.1_g860.1.mk/Pav_sc0001687.1_g190.1.mk	0
pper00052	Galactose metabolism	0.461679	0.980711	Pav_sc0003823.1_g160.1.mk/Pav_sc0000055.1_g570.1.mk	pper:18770520/pper:18771596	2	2	Pav_sc0003823.1_g160.1.mk/Pav_sc0000055.1_g570.1.mk	0
pper00960	Tropane, piperidine and pyridine alkaloid biosynthesis	0.46831	0.980711	Pav_sc0002858.1_g270.1.br	pper:18773390	1	1	Pav_sc0002858.1_g270.1.br	0
pper00010	Glycolysis / Gluconeogenesis	0.495743	0.980711	Pav_sc0000037.1_g120.1.mk/Pav_sc0000659.1_g440.1.mk/Pav_sc0000672.1_g110.1.mk/Pav_sc0000044.1_g840.1.mk	pper:18779199/pper:18771977/pper:18780697/pper:18769483	4	2	Pav_sc0000672.1_g110.1.mk/Pav_sc0000044.1_g840.1.mk	2	Pav_sc0000037.1_g120.1.mk/Pav_sc0000659.1_g440.1.mk
pper00330	Arginine and proline metabolism	0.499911	0.980711	Pav_sc0000373.1_g020.1.mk/Pav_sc0003905.1_g050.1.mk	pper:18766761/pper:18785878	2	0		2	Pav_sc0000373.1_g020.1.mk/Pav_sc0003905.1_g050.1.mk
pper00565	Ether lipid metabolism	0.508786	0.980711	Pav_sc0000907.1_g860.1.mk	pper:18775315	1	1	Pav_sc0000907.1_g860.1.mk	0
pper00760	Nicotinate and nicotinamide metabolism	0.508786	0.980711	Pav_sc0000009.1_g410.1.mk	pper:18783016	1	1	Pav_sc0000009.1_g410.1.mk	0
pper00563	Glycosylphosphatidylinositol (GPI)-anchor biosynthesis	0.527863	0.980711	Pav_sc0002025.1_g030.1.mk	pper:18790910	1	0		1	Pav_sc0002025.1_g030.1.mk
pper00230	Purine metabolism	0.550478	0.980711	Pav_sc0000659.1_g440.1.mk/Pav_sc0000568.1_g560.1.mk/Novel00037	pper:18771977/pper:18768320/pper:18784742	3	1	Novel00037	2	Pav_sc0000659.1_g440.1.mk/Pav_sc0000568.1_g560.1.mk
pper00500	Starch and sucrose metabolism	0.553242	0.980711	Pav_sc0000130.1_g860.1.mk/Pav_sc0000500.1_g060.1.mk/Pav_sc0000055.1_g570.1.mk/Pav_sc0000582.1_g630.1.mk	pper:18767692/pper:18768098/pper:18771596/pper:18768088	4	3	Pav_sc0000500.1_g060.1.mk/Pav_sc0000055.1_g570.1.mk/Pav_sc0000582.1_g630.1.mk	1	Pav_sc0000130.1_g860.1.mk
pper03440	Homologous recombination	0.571004	0.980711	Pav_sc0000409.1_g150.1.mk/Pav_sc0000540.1_g300.1.mk	pper:18777274/pper:18776174	2	2	Pav_sc0000409.1_g150.1.mk/Pav_sc0000540.1_g300.1.mk	0
pper01212	Fatty acid metabolism	0.593038	0.980711	Pav_sc0002842.1_g150.1.mk/Pav_sc0002207.1_g400.1.mk	pper:18767537/pper:18769254	2	1	Pav_sc0002207.1_g400.1.mk	1	Pav_sc0002842.1_g150.1.mk
pper00100	Steroid biosynthesis	0.597091	0.980711	Pav_sc0001248.1_g470.1.mk	pper:18791718	1	1	Pav_sc0001248.1_g470.1.mk	0
pper00062	Fatty acid elongation	0.627828	0.980711	Pav_sc0000174.1_g320.1.mk	pper:18790923	1	0		1	Pav_sc0000174.1_g320.1.mk
pper00380	Tryptophan metabolism	0.627828	0.980711	Pav_sc0000373.1_g020.1.mk	pper:18766761	1	0		1	Pav_sc0000373.1_g020.1.mk
pper04145	Phagosome	0.634567	0.980711	Pav_sc0000103.1_g630.1.mk/Pav_sc0000766.1_g250.1.mk	pper:18777417/pper:18784447	2	1	Pav_sc0000766.1_g250.1.mk	1	Pav_sc0000103.1_g630.1.mk
pper03410	Base excision repair	0.669623	0.980711	Pav_sc0000736.1_g390.1.mk	pper:18779140	1	1	Pav_sc0000736.1_g390.1.mk	0
pper00520	Amino sugar and nucleotide sugar metabolism	0.683907	0.980711	Pav_sc0001792.1_g090.1.mk/Pav_sc0004043.1_g010.1.mk/Pav_sc0001405.1_g1930.1.mk	pper:18793571/pper:18770379/pper:18785973	3	2	Pav_sc0004043.1_g010.1.mk/Pav_sc0001405.1_g1930.1.mk	1	Pav_sc0001792.1_g090.1.mk
pper00410	beta-Alanine metabolism	0.694864	0.980711	Pav_sc0003905.1_g050.1.mk	pper:18785878	1	0		1	Pav_sc0003905.1_g050.1.mk
pper00460	Cyanoamino acid metabolism	0.694864	0.980711	Pav_sc0006018.1_g020.1.mk	pper:18776644	1	1	Pav_sc0006018.1_g020.1.mk	0
pper00061	Fatty acid biosynthesis	0.706757	0.980711	Pav_sc0002842.1_g150.1.mk	pper:18767537	1	0		1	Pav_sc0002842.1_g150.1.mk
pper03020	RNA polymerase	0.706757	0.980711	Pav_co4067545.1_g010.1.br	pper:18769224	1	1	Pav_co4067545.1_g010.1.br	0
pper01200	Carbon metabolism	0.71029	0.980711	Pav_sc0000659.1_g440.1.mk/Pav_co4055217.1_g010.1.mk/Pav_sc0000672.1_g110.1.mk/Pav_sc0001461.1_g070.1.mk/Pav_sc0001710.1_g840.1.mk/Pav_sc0000044.1_g840.1.mk	pper:18771977/pper:18769077/pper:18780697/pper:18776538/pper:18778995/pper:18769483	6	5	Pav_co4055217.1_g010.1.mk/Pav_sc0000672.1_g110.1.mk/Pav_sc0001461.1_g070.1.mk/Pav_sc0001710.1_g840.1.mk/Pav_sc0000044.1_g840.1.mk	1	Pav_sc0000659.1_g440.1.mk
pper04130	SNARE interactions in vesicular transport	0.729181	0.980711	Pav_sc0001006.1_g110.1.mk	pper:18770343	1	0		1	Pav_sc0001006.1_g110.1.mk
pper04141	Protein processing in endoplasmic reticulum	0.730053	0.980711	Pav_sc0000979.1_g170.1.br/Pav_sc0000500.1_g480.1.mk/Pav_sc0000381.1_g240.1.mk/Pav_sc0001964.1_g210.1.br/Pav_sc0001663.1_g310.1.br	pper:18786213/pper:18767349/pper:18791290/pper:18770392/pper:18772092	5	2	Pav_sc0000381.1_g240.1.mk/Pav_sc0001964.1_g210.1.br	3	Pav_sc0000979.1_g170.1.br/Pav_sc0000500.1_g480.1.mk/Pav_sc0001663.1_g310.1.br
pper04146	Peroxisome	0.75419	0.980711	Pav_sc0002207.1_g400.1.mk/Pav_sc0001710.1_g840.1.mk	pper:18769254/pper:18778995	2	2	Pav_sc0002207.1_g400.1.mk/Pav_sc0001710.1_g840.1.mk	0
pper00053	Ascorbate and aldarate metabolism	0.759665	0.980711	Pav_sc0006478.1_g020.1.mk	pper:18772834	1	1	Pav_sc0006478.1_g020.1.mk	0
pper01210	2-Oxocarboxylic acid metabolism	0.76905	0.980711	Pav_co4055217.1_g010.1.mk	pper:18769077	1	1	Pav_co4055217.1_g010.1.mk	0
pper00020	Citrate cycle (TCA cycle)	0.786742	0.980711	Pav_co4055217.1_g010.1.mk	pper:18769077	1	1	Pav_co4055217.1_g010.1.mk	0
pper00030	Pentose phosphate pathway	0.786742	0.980711	Pav_sc0000044.1_g840.1.mk	pper:18769483	1	1	Pav_sc0000044.1_g840.1.mk	0
pper01230	Biosynthesis of amino acids	0.787761	0.980711	Pav_sc0000659.1_g440.1.mk/Novel00190/Pav_co4055217.1_g010.1.mk/Pav_sc0000672.1_g110.1.mk/Pav_sc0000044.1_g840.1.mk	pper:18771977/pper:18788092/pper:18769077/pper:18780697/pper:18769483	5	3	Pav_co4055217.1_g010.1.mk/Pav_sc0000672.1_g110.1.mk/Pav_sc0000044.1_g840.1.mk	2	Pav_sc0000659.1_g440.1.mk/Novel00190
pper04070	Phosphatidylinositol signaling system	0.825306	0.980711	Pav_sc0000484.1_g710.1.mk	pper:18783606	1	1	Pav_sc0000484.1_g710.1.mk	0
pper04144	Endocytosis	0.843198	0.980711	Pav_sc0000907.1_g860.1.mk/Pav_co4015173.1_g010.1.mk/Pav_sc0001964.1_g210.1.br	pper:18775315/pper:18768866/pper:18770392	3	2	Pav_sc0000907.1_g860.1.mk/Pav_sc0001964.1_g210.1.br	1	Pav_co4015173.1_g010.1.mk
pper00630	Glyoxylate and dicarboxylate metabolism	0.845034	0.980711	Pav_sc0001710.1_g840.1.mk	pper:18778995	1	1	Pav_sc0001710.1_g840.1.mk	0
pper00051	Fructose and mannose metabolism	0.856941	0.980711	Pav_sc0000044.1_g840.1.mk	pper:18769483	1	1	Pav_sc0000044.1_g840.1.mk	0
pper00562	Inositol phosphate metabolism	0.867939	0.980711	Pav_sc0007703.1_g010.1.mk	pper:18774523	1	1	Pav_sc0007703.1_g010.1.mk	0
pper00561	Glycerolipid metabolism	0.891901	0.980711	Pav_sc0001687.1_g190.1.mk	pper:18774839	1	1	Pav_sc0001687.1_g190.1.mk	0
pper04120	Ubiquitin mediated proteolysis	0.899486	0.980711	Pav_sc0000381.1_g240.1.mk/Pav_sc0006091.1_g020.1.mk	pper:18791290/pper:18768375	2	1	Pav_sc0000381.1_g240.1.mk	1	Pav_sc0006091.1_g020.1.mk
pper00620	Pyruvate metabolism	0.904152	0.980711	Pav_sc0000659.1_g440.1.mk	pper:18771977	1	0		1	Pav_sc0000659.1_g440.1.mk
pper00480	Glutathione metabolism	0.918368	0.980711	Pav_sc0000206.1_g560.1.br	pper:18774018	1	1	Pav_sc0000206.1_g560.1.br	0
pper03008	Ribosome biogenesis in eukaryotes	0.924671	0.980711	Pav_sc0000205.1_g320.1.mk	pper:18789776	1	1	Pav_sc0000205.1_g320.1.mk	0
pper03015	mRNA surveillance pathway	0.971391	0.997327	Pav_sc0000586.1_g020.1.mk	pper:18772563	1	1	Pav_sc0000586.1_g020.1.mk	0
pper03013	RNA transport	0.993396	0.997327	Pav_sc0000296.1_g100.1.mk	pper:18780630	1	0		1	Pav_sc0000296.1_g100.1.mk
pper03010	Ribosome	0.997073	0.997327	Pav_sc0003802.1_g150.1.mk/Pav_sc0000040.1_g200.1.br	pper:18781012/pper:18767652	2	1	Pav_sc0003802.1_g150.1.mk	1	Pav_sc0000040.1_g200.1.br
pper03040	Spliceosome	0.997327	0.997327	Pav_sc0001964.1_g210.1.br	pper:18770392	1	1	Pav_sc0001964.1_g210.1.br	0
KEGG: Kyoto Encyclopedia of Genes and Genomes
p-value: Statistical significance test index
padj: The corrected p-value
