# Supplementary material for: Transcriptomic analysis reveals insights into the response to Hop stunt viroid (HSVd) in sweet cherry (Prunus avium L.) fruits
Source: PeerJ. 2020 Sep 21;8:e10005. doi: 10.7717/peerj.10005 (PMC7513744; doi:10.7717/peerj.10005)
Supplement: Supplemental Information 5 — GDF: Green Dapple Fruit; GHF: Green Healthy Fruit; fpkm: Expected number of Fragments Per Kilobase of transcript sequence per Millions base pairs sequenced; p-value: Statistical significance test index; padj: The corrected p-value; nr: RefSeq non-redundant proteins; KEGG: Kyoto Encyclopedia of Genes and Genomes. [file peerj-08-10005-s005.xls]

## Sheet: S5
Table S5. Differentially expressed genes in plant hormone signal transduction pathway.
Gene ID	GHF_mean_fpkm	GDF_mean_fpkm	log2FoldChange(GDFvsGHF)	p-value	padj	regulate	nr_annotation	KEGG_annotation	KEGG_gene
Pav_sc0002858.1_g200.1.mk	97.2485	709.714	2.7672	4.35e-60	2.21e-57	UP		probable protein phosphatase 2C 24 [Prunus avium]	PP2C
Pav_sc0000044.1_g680.1.br	1.49791	27.8077	4.1226	1.14e-19	8.08e-18	UP	auxin-responsive protein SAUR50-like [Prunus avium]	K14488|1.03498e-73|pper:PRUPE_ppa013735mg|K14488 SAUR family protein | (RefSeq) hypothetical protein	SAUR
Pav_co4041309.1_g010.1.br	0.504507	14.4276	4.7052	7.97e-24	7.56e-22	UP	ethylene signalling protein, partial [Prunus persica]	K14513|2.79398e-67|pmum:103342142|K14513 ethylene-insensitive protein 2 | (RefSeq) ethylene-insensitive protein 2	EIN
Pav_sc0005603.1_g090.1.br	0	32.5572	Inf	2.49e-58	1.11e-55	UP	indole-3-acetic acid-induced protein ARG7-like [Prunus avium]	--	SAUR
Pav_sc0002056.1_g070.1.br	0	24.8885	Inf	2.42e-44	6.68e-42	UP	auxin-induced protein 15A-like [Prunus avium]	K14488|1.29426e-57|pper:PRUPE_ppa015749mg|K14488 SAUR family protein | (RefSeq) hypothetical protein	SAUR
Pav_sc0000269.1_g440.1.mk	0.216188	2.1518	3.2167	2.3e-17	1.38e-15	UP	indole-3-acetic acid-amido synthetase GH3.6 [Prunus avium]	K14487|0|pper:PRUPE_ppa002986mg|K14487 auxin responsive GH3 gene family | (RefSeq) hypothetical protein	GH3
Pav_sc0001583.1_g270.1.br	2.7471	17.3811	2.5517	4.12e-17	2.42e-15	UP	auxin-responsive protein SAUR71-like [Prunus avium]	K14488|8.24221e-66|pper:PRUPE_ppa013119mg|K14488 SAUR family protein | (RefSeq) hypothetical protein	SAUR
Novel00046	0.422975	3.61501	2.9994	0.00042666	0.0033455	UP	transcription factor TGA7 isoform X3 [Prunus avium]	K14431|0|pmum:103332956|K14431 transcription factor TGA | (RefSeq) transcription factor TGA3	TGA
Pav_sc0000030.1_g1280.1.mk	0.0103163	0.40648	5.1945	0.0001004	0.00096638	UP	auxin transporter-like protein 3 [Prunus avium]	K13946|0|pper:PRUPE_ppa005323mg|K13946 auxin influx carrier (AUX1 LAX family) | (RefSeq) hypothetical protein	AUX
Pav_sc0002080.1_g160.1.mk	0.110291	1.37175	3.5492	0.00063748	0.0046785	UP	auxin-induced protein 6B [Prunus avium]	K14488|1.00543e-105|pper:PRUPE_ppa012903mg|K14488 SAUR family protein | (RefSeq) hypothetical protein	SAUR
Pav_sc0001580.1_g140.1.mk	3.83779	20.1167	2.2916	2.74e-17	1.63e-15	UP	protein TIFY 10b-like [Prunus avium]	K13464|8.26242e-103|pper:PRUPE_ppa011370mg|K13464 jasmonate ZIM domain-containing protein | (RefSeq) hypothetical	JAZ
Pav_sc0002080.1_g130.1.br	0.180054	1.64404	3.177	0.002986	0.016841	UP	auxin-responsive protein SAUR50 [Prunus persica]	K14488|8.73212e-73|pper:PRUPE_ppa015189mg|K14488 SAUR family protein | (RefSeq) hypothetical protein	SAUR
Pav_sc0000752.1_g150.1.br	201.781	34.3415	-2.6535	6.46e-25	6.48e-23	DOWN	PREDICTED: auxin-induced protein 15A-like [Prunus mume]	--	SAUR
Pav_sc0000983.1_g260.1.mk	39.5056	8.374	-2.3239	2.05e-36	3.84e-34	DOWN	auxin-induced protein AUX28-like [Prunus avium]	K14484|7.9536e-166|pmum:103334167|K14484 auxin-responsive protein IAA | (RefSeq) auxin-induced protein AUX28-like	AUX/IAA
Pav_sc0000480.1_g730.1.mk	17.8611	4.50508	-2.0874	1.46e-13	6.13e-12	DOWN	auxin-responsive protein SAUR50-like [Prunus avium]	K14488|1.69841e-94|pmum:103325882|K14488 SAUR family protein | (RefSeq) auxin-induced protein 10A5-like	SAUR
Pav_sc0000752.1_g170.1.br	5.19717	0.0873054	-5.9864	1.1e-12	4.25e-11	DOWN	auxin-responsive protein SAUR21-like [Prunus avium]	--	SAUR
Pav_sc0000752.1_g190.1.br	2.11202	0.213568	-3.4095	0.00060739	0.0044842	DOWN	auxin-responsive protein SAUR21-like [Prunus avium]	--	SAUR
Pav_sc0000555.1_g070.1.mk	1.02881	0.161344	-2.7874	0.0087858	0.040251	DOWN	auxin-responsive protein SAUR65-like [Prunus avium]	K14488|1.11253e-105|pmum:103322112|K14488 SAUR family protein | (RefSeq) auxin-responsive protein SAUR32-like	SAUR
GDF: Green Dapple Fruit
GHF: Green Healthy Fruit
fpkm: Expected number of Fragments Per Kilobase of transcript sequence per Millions base pairs sequenced
p-value: Statistical significance test index
padj: The corrected p-value
nr: RefSeq non-redundant proteins
KEGG: Kyoto Encyclopedia of Genes and Genomes
* Inf, Infinite (The denominator is zero.).
