# Supplementary material for: Transcriptomic analysis reveals insights into the response to Hop stunt viroid (HSVd) in sweet cherry (Prunus avium L.) fruits
Source: PeerJ. 2020 Sep 21;8:e10005. doi: 10.7717/peerj.10005 (PMC7513744; doi:10.7717/peerj.10005)
Supplement: Supplemental Information 6 — GDF: Green Dapple Fruit; GHF: Green Healthy Fruit; fpkm: Expected number of Fragments Per Kilobase of transcript sequence per Millions base pairs sequenced; p-value: Statistical significance test index; padj: The corrected p-value; nr: RefSeq non-redundant proteins; KEGG: Kyoto Encyclopedia of Genes and Genomes [file peerj-08-10005-s006.xls]

## Sheet: S6
Table S6. Differentially expressed genes in basal defense responses.
Gene ID	GHF_mean_fpkm	GDF_mean_fpkm	log2FoldChange(GDFvsGHF)	p-value	padj	regulate	nr_annotation	KEGG_annotation	KEGG_gene
Pav_sc0000138.1_g1220.1.mk	0.148573	0.85819	2.4167	0.0012361	0.0081698	UP	cyclic nucleotide-gated ion channel 1-like [Prunus avium]	K05391|0|pper:PRUPE_ppa016622mg|K05391 cyclic nucleotide gated channel, other eukaryote | (RefSeq) hypothetical protein	CNGC
Pav_sc0000440.1_g200.1.mk	0.079205	0.420561	2.3522	0.00017004	0.0015268	UP	calcium-dependent protein kinase 26-like [Prunus avium]	K13412|0|pper:PRUPE_ppa002734mg|K13412 calcium-dependent protein kinase [EC:2.7.11.1] | (RefSeq) hypothetical protein	CDPK
Pav_sc0000886.1_g850.1.mk	0.00835415	0.239679	4.7838	4.4e-07	7.61e-06	UP	respiratory burst oxidase homolog protein A [Prunus avium]	K13447|0|pper:PRUPE_ppa000913mg|K13447 respiratory burst oxidase [EC:1.6.3.- 1.11.1.-] | (RefSeq) hypothetical protein	RBOH
Pav_sc0000071.1_g810.1.mk	0.0265499	0.955424	5.0194	0.0013926	0.0089824	UP	calmodulin-like protein 1 [Prunus avium]	K13448|4.67334e-118|pmum:103340224|K13448 calcium-binding protein CML | (RefSeq) calmodulin-like protein 1	CML
Pav_sc0000484.1_g710.1.mk	0.828938	4.80474	2.4226	9.16e-06	0.00011719	UP	probable calcium-binding protein CML45 [Prunus avium]	K02183|1.50455e-106|pper:PRUPE_ppa011701mg|K02183 calmodulin | (RefSeq) hypothetical protein	CML
Pav_sc0000348.1_g1020.1.mk	0.32069	2.03049	2.5768	0.00014854	0.0013598	UP	probable calcium-binding protein CML41 [Prunus avium]	K13448|2.75296e-101|pper:PRUPE_ppa016099mg|K13448 calcium-binding protein CML | (RefSeq) hypothetical protein	CML
Pav_sc0001911.1_g560.1.mk	0.0282538	0.328822	3.4178	0.010043	0.044699	UP	disease resistance protein RPM1-like [Prunus avium]	K13457|0|pmum:103336811|K13457 disease resistance protein RPM1 | (RefSeq) disease resistance protein RPM1-like	RPM
Pav_sc0000480.1_g090.1.mk	0.2095	0.03641	-2.6248	0.0039051	0.02091	DOWN	protein CNGC15b isoform X1 [Prunus avium]	K05391|0|pper:PRUPE_ppa002211mg|K05391 cyclic nucleotide gated channel, other eukaryote | (RefSeq) hypothetical protein	CNGC
Pav_sc0001524.1_g050.1.mk	7.31641	0	#NAME	8.98e-60	4.38e-57	DOWN	disease resistance protein RPM1-like [Prunus avium]	K13457|0|pper:PRUPE_ppa018088mg|K13457 disease resistance protein RPM1 | (RefSeq) hypothetical protein	RPM
Pav_sc0000886.1_g690.1.mk	0.0386389	0.392622	3.273	0.00034937	0.0028302	UP	1-aminocyclopropane-1-carboxylate synthase [Prunus avium]	K20772|0|pmum:103337567|K20772 1-aminocyclopropane-1-carboxylate synthase 1/2/6 [EC:4.4.1.14] | (RefSeq) 1-aminocyclopropane-1-carboxylate synthase	ACS
Pav_co4041309.1_g010.1.br	0.504507	14.4276	4.7052	7.97e-24	7.56e-22	UP	ethylene signalling protein, partial [Prunus persica]	K14513|2.79398e-67|pmum:103342142|K14513 ethylene-insensitive protein 2 | (RefSeq) ethylene-insensitive protein 2	EIN
Pav_sc0000599.1_g120.1.mk	0.0294655	0.578733	4.1725	5.7e-11	1.8e-09	UP	probable copper-transporting ATPase HMA5 isoform X1 [Prunus avium]	K17686|0|pmum:103337473|K17686 Cu+-exporting ATPase [EC:3.6.3.54] | (RefSeq) probable copper-transporting ATPase HMA5	HMA
Pav_sc0001077.1_g280.1.mk	4.09367	34.9129	2.9807	6.45e-06	8.57e-05	UP	mitogen-activated protein kinase kinase kinase 18-like [Prunus avium]	--	MAP3K2
Pav_sc0000484.1_g710.1.mk	0.828938	4.80474	2.4226	9.16e-06	0.00011719	UP	probable calcium-binding protein CML45 [Prunus avium]	K02183|1.50455e-106|pper:PRUPE_ppa011701mg|K02183 calmodulin | (RefSeq) hypothetical protein	CML
GDF: Green Dapple Fruit
GHF: Green Healthy Fruit
fpkm: Expected number of Fragments Per Kilobase of transcript sequence per Millions base pairs sequenced
p-value: Statistical significance test index
padj: The corrected p-value
nr: RefSeq non-redundant proteins
KEGG: Kyoto Encyclopedia of Genes and Genomes
* #NAME, Not Applicable
