# Supplementary material for: Transcriptomic analysis reveals insights into the response to Hop stunt viroid (HSVd) in sweet cherry (Prunus avium L.) fruits
Source: PeerJ. 2020 Sep 21;8:e10005. doi: 10.7717/peerj.10005 (PMC7513744; doi:10.7717/peerj.10005)
Supplement: Supplemental Information 7 — GDF: Green Dapple Fruit; GHF: Green Healthy Fruit; fpkm: Expected number of Fragments Per Kilobase of transcript sequence per Millions base pairs sequenced; p-value: Statistical significance test index; padj: The corrected p-value; nr: RefSeq non-redundant proteins; KEGG: Kyoto Encyclopedia of Genes and Genomes [file peerj-08-10005-s007.xls]

## Sheet: S7
Table S7. Differentially expressed genes in secondary metabolites metabolism.
Gene ID	GHF_mean_fpkm	GDF_mean_fpkm	log2FoldChange(GDFvsGHF)	p-value	padj	regulate	nr_annotation	KEGG_annotation	KEGG_gene
Pav_co4071347.1_g010.1.mk	8.65951	39.0326	2.0701	3.31e-15	1.63e-13	UP	PREDICTED: phenylalanine ammonia-lyase 1 [Prunus mume]	K10775|0|pmum:103342143|K10775 phenylalanine ammonia-lyase [EC:4.3.1.24] | (RefSeq) phenylalanine ammonia-lyase 1	PAL
Pav_sc0003326.1_g220.1.mk	0.468685	4.08306	3.0399	7.42e-08	1.48e-06	UP	shikimate O-hydroxycinnamoyltransferase-like [Prunus avium]	K13065|1.16164e-93|pper:PRUPE_ppa005910mg|K13065 shikimate O-hydroxycinnamoyltransferase [EC:2.3.1.133] | (RefSeq) hypothetical protein	HST
Pav_sc0001196.1_g1100.1.mk	0.0630335	0.727749	3.4431	8.35e-07	1.37e-05	UP	cytochrome P450 98A2 [Prunus persica]	K09754|0|pper:PRUPE_ppa004404mg|K09754 coumaroylquinate(coumaroylshikimate) 3'-monooxygenase [EC:1.14.13.36] | (RefSeq) hypothetical protein	CYP98A
Pav_sc0000729.1_g240.1.br	2.99097	16.8759	2.3945	2.89e-09	7.25e-08	UP	berberine bridge enzyme-like 15 [Prunus avium]	--
Pav_sc0000028.1_g820.1.mk	0.0803996	2.81797	5.0756	1.92e-12	7.16e-11	UP	1-Cys peroxiredoxin [Prunus avium]	K11188|4.21473e-161|pper:PRUPE_ppa011195mg|K11188 peroxiredoxin 6, 1-Cys peroxiredoxin [EC:1.11.1.7 1.11.1.15 3.1.1.-] | (RefSeq) hypothetical protein	peroxidase
Pav_sc0001323.1_g1090.1.mk	0	0.364348	Inf	0.0030624	0.017209	UP	peroxidase 43 isoform X1 [Prunus avium]	K00430|0|pper:PRUPE_ppa008667mg|K00430 peroxidase [EC:1.11.1.7] | (RefSeq) hypothetical protein	peroxidase
Pav_sc0000099.1_g130.1.mk	0.0641564	0.677207	3.3238	0.0010614	0.007191	UP	peroxidase 72-like [Prunus avium]	K00430|0|pper:PRUPE_ppa008349mg|K00430 peroxidase [EC:1.11.1.7] | (RefSeq) hypothetical protein	peroxidase
Pav_sc0000017.1_g020.1.mk	10.3436	1.06306	-3.37	1.07e-30	1.55e-28	DOWN	peroxidase 47-like [Prunus avium]	K00430|1.98503e-168|pmum:103326241|K00430 peroxidase [EC:1.11.1.7] | (RefSeq) peroxidase 47	peroxidase
Pav_sc0000045.1_g280.1.mk	5.10756	27.1897	2.3045	1.67e-09	4.31e-08	UP	PREDICTED: chalcone synthase 1-like [Nelumbo nucifera]	K00660|2.62619e-152|nnu:104602224|K00660 chalcone synthase [EC:2.3.1.74] | (RefSeq) chalcone synthase G-like	CHS
Pav_sc0000030.1_g1340.1.mk	0.126745	4.99025	5.1887	3.04e-27	3.6e-25	UP	flavonol synthase/flavanone 3-hydroxylase-like [Prunus avium]	K05278|0|pper:PRUPE_ppa008455mg|K05278 flavonol synthase [EC:1.14.11.23] | (RefSeq) hypothetical protein	FLS
Pav_sc0007510.1_g020.1.mk	14.4693	0.322712	-5.5873	2.24e-60	1.16e-57	DOWN	PREDICTED: chalcone--flavonone isomerase [Malus domestica]	K01859|1.04602e-58|mdm:103421113|K01859 chalcone isomerase [EC:5.5.1.6] | (RefSeq) chalcone--flavonone isomerase	CHI
GDF: Green Dapple Fruit
GHF: Green Healthy Fruit
fpkm: Expected number of Fragments Per Kilobase of transcript sequence per Millions base pairs sequenced
p-value: Statistical significance test index
padj: The corrected p-value
nr: RefSeq non-redundant proteins
KEGG: Kyoto Encyclopedia of Genes and Genomes
* Inf, Infinite (The denominator is zero.).
