# Supplementary material for: Transcriptomic analysis reveals insights into the response to Hop stunt viroid (HSVd) in sweet cherry (Prunus avium L.) fruits
Source: PeerJ. 2020 Sep 21;8:e10005. doi: 10.7717/peerj.10005 (PMC7513744; doi:10.7717/peerj.10005)
Supplement: Supplemental Information 8 — GDF: Green Dapple Fruit; GHF: Green Healthy Fruit;fpkm: Expected number of Fragments Per Kilobase of transcript sequence per Millions base pairs sequenced; p-value: Statistical significance test index; padj: The corrected p-value; nr: RefSeq non-redundant proteins; KEGG: Kyoto Encyclopedia of Genes and Genomes. [file peerj-08-10005-s008.xls]

## Sheet: S8
Table S8.Transcription factors involved in responses to HSVd infection in sweet cherry fruits.
Gene ID	Family	GHF_mean_fpkm	GDF_mean_fpkm	log2FoldChange(GDFvsGHF)	p-value	padj	regulate	nr_annotation	KEGG_annotation
Pav_sc0001428.1_g070.1.mk	Znf-LSD	3.21927	0.720116	-2.261	6.22e-07	1.04e-05	DOWN	protein LOL1 [Prunus avium]	--
Pav_sc0000069.1_g330.1.mk	WRKY	0.128412	2.55268	4.1679	7.73e-05	0.00076881	UP	probable WRKY transcription factor 50 [Prunus persica]	--
Pav_sc0002318.1_g190.1.mk	WRKY	1.45759	7.09241	2.1758	4.16e-15	2.04e-13	UP	probable WRKY transcription factor 70 [Prunus avium]	--
Pav_sc0004917.1_g050.1.mk	WRKY	0	1.37683	Inf	0.0030607	0.017204	UP	probable WRKY transcription factor 51 [Prunus avium]	--
Pav_sc0001582.1_g320.1.mk	WRKY	1.37281	9.8584	2.7483	0.00025568	0.0021602	UP	probable WRKY transcription factor 70 [Prunus avium]	--
Pav_sc0000890.1_g1270.1.br	WD40-like	0.585417	3.53372	2.4766	7.21e-10	1.95e-08	UP	protein JINGUBANG [Prunus avium]	--
Pav_sc0001364.1_g030.1.mk	WD40-like	0.0135028	0.110185	2.9383	0.0050912	0.02598	UP	putative E3 ubiquitin-protein ligase LIN-1 [Prunus avium]	--
Pav_sc0006064.1_g080.1.br	WD40-like	0.0581728	0.526535	3.074	0.10667	0.27448	UP	cell division cycle 20.2, cofactor of APC complex-like [Prunus avium]	K03363|0|pmum:103322354|K03363 cell division cycle 20, cofactor of APC complex | (RefSeq) cell division cycle 20.2, cofactor of APC complex-like
Pav_sc0001580.1_g140.1.mk	TIFY	3.83779	20.1167	2.2916	2.74e-17	1.63e-15	UP	protein TIFY 10b-like [Prunus avium]	K13464|8.26242e-103|pper:PRUPE_ppa011370mg|K13464 jasmonate ZIM domain-containing protein | (RefSeq) hypothetical protein
Pav_sc0002358.1_g040.1.mk	TCP	1.01803	6.45451	2.5639	3.05e-05	0.0003412	UP	transcription factor TCP17-like [Prunus avium]	--
Pav_sc0000044.1_g1010.1.mk	STY-LRP1	0.0497258	0.578015	3.461	0.080167	0.22224	UP	PREDICTED: protein SHORT INTERNODES-like [Prunus mume]	--
Pav_sc0001554.1_g180.1.mk	NAM	0.419811	2.67096	2.5595	4.72e-06	6.45e-05	UP	NAC domain-containing protein 71-like [Prunus avium]	--
Pav_sc0004971.1_g050.1.br	NAM	0	2.20376	Inf	4.73e-06	6.47e-05	UP	heat shock protein 81-1-like, partial [Prunus avium]	--
Pav_sc0000244.1_g070.1.mk	NAM	0.108834	2.11516	4.1796	3.33e-06	4.7e-05	UP	NAC domain-containing protein 35 [Prunus avium]	--
Pav_sc0000212.1_g1170.1.mk	NAM	0	0.120945	Inf	0.0103	0.045567	UP	hypothetical protein CUMW_132760 [Citrus unshiu]	--
Pav_sc0001183.1_g230.1.br	NAM	16.645	3.70591	-2.2736	2.18e-05	0.00025213	DOWN	NAC domain-containing protein 71-like [Prunus avium]	--
Pav_sc0000800.1_g060.1.mk	MYB-HB-like	2.06002	0.392044	-2.4886	1.83e-05	0.00021685	DOWN	transcription factor MYB44-like [Prunus avium]	--
Pav_sc0001974.1_g300.1.mk	MYB-HB-like	0	0.12169	Inf	0.0061507	0.030275	UP	myb family transcription factor PHL5 isoform X1 [Prunus avium]	--
Pav_sc0001309.1_g810.1.mk	MYB-HB-like	0	0.544977	Inf	0.0036878	0.019997	UP	transcription factor WER-like isoform X2 [Prunus avium]	K09422|3.59786e-37|pper:PRUPE_ppa010908mg|K09422 myb proto-oncogene protein, plant | (RefSeq) hypothetical protein
Pav_sc0000736.1_g010.1.mk	MYB-HB-like	0.104029	0.918606	3.0609	0.0025964	0.015018	UP	myb family transcription factor APL isoform X1 [Prunus avium]	--
Pav_sc0004270.1_g020.1.mk	MYB-HB-like	0.0878377	3.31463	5.1826	3.68e-07	6.47e-06	UP	putative two-component response regulator ARR21 [Prunus avium]	--
Pav_sc0000704.1_g080.1.mk	MYB-HB-like	0.0241505	0.888438	5.1311	1.09e-05	0.00013707	UP	myb family transcription factor EFM [Prunus avium]	--
Pav_sc0000103.1_g1460.1.mk	MYB-HB-like	0.460439	2.68781	2.4595	6.79e-14	2.95e-12	UP	protein REVEILLE 7-like [Prunus avium]	--
Pav_sc0000220.1_g1310.1.mk	MYB-HB-like	0.0295502	0.52515	4.0132	0.0039482	0.021123	UP	myb family transcription factor PHL8 [Prunus persica]	--
Pav_sc0000586.1_g490.1.mk	MYB-HB-like	0	0.81257	Inf	0.00080801	0.0057126	UP	myb-related protein 308-like [Prunus avium]	K09422|7.40226e-76|pper:PRUPE_ppa009439mg|K09422 myb proto-oncogene protein, plant | (RefSeq) hypothetical protein
Pav_sc0000130.1_g010.1.mk	MYB-HB-like	0.171659	0	#NAME	0.0048737	0.025128	DOWN	PREDICTED: kinesin-like protein KLP2 isoform X1 [Prunus mume]	K10401|0|pmum:103334058|K10401 kinesin family member 18/19 | (RefSeq) kinesin-like protein KLP2
Pav_sc0004901.1_g010.1.mk	MYB-HB-like	0.148685	1.76796	3.5016	0.0051982	0.026407	UP	myb-related protein 2 [Prunus avium]	--
Pav_sc0000820.1_g020.1.mk	MADS-type1	4.81849	1.28181	-2.0161	0.0002646	0.0022264	DOWN	agamous-like MADS-box protein AGL61 [Prunus avium]	--
Pav_sc0000502.1_g710.1.mk	MADS-MIKC	0.0630338	0.750103	3.4665	0.00023467	0.002012	UP	agamous-like MADS-box protein AGL12 [Prunus avium]	--
Pav_sc0001338.1_g320.1.mk	HSF-type-DNA-binding	0.0943042	0.687132	2.7682	0.00021119	0.0018417	UP	heat stress transcription factor B-3 [Prunus avium]	K09419|4.19583e-133|pmum:103342403|K09419 heat shock transcription factor, other eukaryote | (RefSeq) heat stress transcription factor B-3
Pav_sc0007634.1_g010.1.mk	Homobox-WOX	1.12461	6.02753	2.3186	6.82e-07	1.14e-05	UP	homeobox-leucine zipper protein HAT22-like [Prunus avium]	K09338|4.3822e-153|pper:PRUPE_ppa009614mg|K09338 homeobox-leucine zipper protein | (RefSeq) hypothetical protein
Pav_sc0000348.1_g1180.1.mk	Homobox-WOX	0.547233	2.51633	2.1127	4.37e-05	0.0004668	UP	homeobox-leucine zipper protein ATHB-40 [Prunus avium]	K09338|5.57499e-122|pper:PRUPE_ppa011343mg|K09338 homeobox-leucine zipper protein | (RefSeq) hypothetical protein
Pav_sc0000666.1_g050.1.mk	GRAS	0.166285	1.60671	3.1821	0.0016287	0.010266	UP	protein SHORT-ROOT isoform X1 [Prunus avium]	--
Pav_sc0000977.1_g630.1.br	GRAS	0.0677787	1.45809	4.3443	5.28e-08	1.08e-06	UP	probable LRR receptor-like serine/threonine-protein kinase At1g53420 [Prunus avium]	--
Pav_sc0001580.1_g470.1.mk	GRAS	0.180023	0.917605	2.2608	6.33e-05	0.00064634	UP	nodulation-signaling pathway 1 protein [Prunus avium]	--
Pav_sc0000048.1_g250.1.br	FAR	0	0.449867	Inf	0.00054146	0.0040674	UP	protein FAR1-RELATED SEQUENCE 5-like [Prunus avium]	K17604|5.09107e-156|pper:PRUPE_ppa018163mg|K17604 zinc finger SWIM domain-containing protein 3 | (RefSeq) hypothetical protein
Pav_sc0004447.1_g050.1.br	FAR	0.155603	0	#NAME	0.0064516	0.03147	DOWN	protein FAR1-RELATED SEQUENCE 5-like [Prunus avium]	K17604|0|pmum:103344202|K17604 zinc finger SWIM domain-containing protein 3 | (RefSeq) protein FAR1-RELATED SEQUENCE 5-like
Pav_sc0001963.1_g250.1.mk	C3H	0.273058	1.5143	2.4339	0.029605	0.10477	UP	protein SULFUR DEFICIENCY-INDUCED 1 isoform X1 [Prunus avium]	--
Pav_sc0000040.1_g760.1.br	C2H2	3.89725	0.0339477	-6.9291	1.32e-14	6.22e-13	DOWN	PREDICTED: uncharacterized protein LOC103344174 [Prunus mume]	--
Pav_sc0001899.1_g020.1.mk	C2H2	3.17011	0.110553	-4.9369	3.69e-27	4.33e-25	DOWN	protein DEHYDRATION-INDUCED 19-like isoform X1 [Prunus avium]	--
Pav_sc0000638.1_g210.1.mk	C2H2	0.021123	0.777262	5.1218	4.41e-09	1.08e-07	UP	UDP-glycosyltransferase 71K1-like [Prunus avium]	--
Pav_sc0002741.1_g140.1.br	C2H2	0.11247	1.01742	3.0774	2.58e-05	0.0002931	UP	RING-H2 finger protein ATL52-like [Prunus avium]	--
Pav_sc0000549.1_g950.1.mk	C2H2	0	0.298945	Inf	0.022787	0.08529	UP	E3 ubiquitin-protein ligase SIRP1-like [Prunus avium]	--
Pav_co4023303.1_g010.1.mk	C2H2	1.05834	0	#NAME	3.84e-10	1.09e-08	DOWN	E3 ubiquitin-protein ligase rnf8-A-like isoform X1 [Prunus avium]	--
Pav_sc0001240.1_g170.1.br	C2H2	2.3194	0.0832002	-4.895	9.2e-14	3.94e-12	DOWN	PREDICTED: uncharacterized protein LOC103344174 [Prunus mume]	--
Pav_sc0005045.1_g010.1.mk	C2H2	0.447993	2.42506	2.41	0.0015441	0.0098112	UP	PREDICTED: uncharacterized protein At4g10930 isoform X2 [Prunus mume]	--
Pav_sc0000719.1_g800.1.mk	C2H2	2.98499	15.0406	2.2363	1.14e-11	3.89e-10	UP	PREDICTED: E3 ubiquitin-protein ligase At4g11680 isoform X1 [Prunus mume]	--
Pav_sc0000563.1_g270.1.mk	C2H2	0.157841	10.4838	5.9315	3.81e-84	4.3e-81	UP	abscisic acid 8&apos;-hydroxylase 2 isoform X2 [Prunus persica]	K09843|0|pper:PRUPE_ppa005020mg|K09843 (+)-abscisic acid 8'-hydroxylase [EC:1.14.13.93] | (RefSeq) hypothetical protein
Pav_sc0001539.1_g100.1.mk	C2H2	0.979033	5.10633	2.2959	3.53e-11	1.14e-09	UP	E3 ubiquitin-protein ligase SGR9, amyloplastic-like isoform X2 [Prunus avium]	--
Pav_sc0001740.1_g310.1.mk	C2H2	0.462306	0.026769	-4.2307	0.00086765	0.0060841	DOWN	uncharacterized protein LOC110769643 [Prunus avium]	--
Pav_sc0000354.1_g090.1.mk	C2H2	0	0.203076	Inf	0.013586	0.056782	UP	RING-H2 finger protein ATL46 [Prunus persica]	--
Pav_sc0002475.1_g210.1.mk	C2H2	25.9036	134.494	2.2741	1.39e-16	7.82e-15	UP	zinc finger protein ZAT10-like [Prunus avium]	--
Pav_sc0006212.1_g070.1.mk	C2H2	0.113996	0.726269	2.5915	0.0020669	0.012447	UP	RING-H2 finger protein ATL52-like [Prunus avium]	--
Pav_sc0001422.1_g080.1.mk	C2H2	0	0.57546	Inf	0.0036211	0.019708	UP	zinc finger protein 7-like [Prunus avium]	--
Pav_sc0000998.1_g250.1.mk	C2H2	1.01292	0.0297776	-5.1578	2.71e-10	7.81e-09	DOWN	E3 ubiquitin protein ligase DRIP2-like isoform X2 [Prunus avium]	K16277|0|pper:PRUPE_ppa026588mg|K16277 E3 ubiquitin-protein ligase DRIP [EC:2.3.2.27] | (RefSeq) hypothetical protein
Pav_sc0003681.1_g060.1.mk	C2H2	0.046302	0.526056	3.3986	0.0021779	0.013018	UP	E3 ubiquitin-protein ligase RNF126-like [Prunus avium]	--
Pav_sc0002025.1_g030.1.mk	C2H2	1.38892	0	#NAME	2.09e-13	8.63e-12	DOWN	PREDICTED: GPI ethanolamine phosphate transferase 3 isoform X1 [Juglans regia]	K05288|0|pper:PRUPE_ppa000909mg|K05288 phosphatidylinositol glycan, class O | (RefSeq) hypothetical protein
Pav_sc0000759.1_g400.1.mk	C2C2-GATA	0	0.229732	Inf	0.012688	0.053807	UP	GATA transcription factor 9-like [Prunus avium]	--
Pav_sc0000055.1_g320.1.mk	C2C2-GATA	1.10591	0.183144	-2.692	0.10007	0.26201	FALSE	GATA transcription factor 15 [Prunus persica]	--
Pav_sc0000323.1_g800.1.mk	C2C2-Dof	0	0.606311	Inf	9.21e-06	0.00011768	UP	dof zinc finger protein DOF2.1 [Prunus avium]	--
Novel00426	C2C2-Dof	0.0918475	0.872972	3.156	0.0002462	0.0020986	UP	dof zinc finger protein DOF4.6-like [Prunus avium]	--
Pav_sc0001305.1_g030.1.mk	C2C2-Dof	0.135653	3.26806	4.4984	7.73e-11	2.39e-09	UP	dof zinc finger protein DOF1.4-like [Prunus avium]	--
Pav_sc0000554.1_g1250.1.mk	C2C2-Dof	0.085692	0.780098	3.0858	4.69e-06	6.41e-05	UP	dof zinc finger protein DOF3.6 [Prunus avium]	--
Pav_sc0000586.1_g500.1.mk	C2C2-Dof	0.0651995	0.406264	2.5495	0.0060626	0.029901	UP	dof zinc finger protein DOF2.5-like isoform X2 [Prunus avium]	--
Pav_sc0000780.1_g430.1.mk	C2C2-Dof	0.0351595	0.806017	4.4127	3.78e-08	7.96e-07	UP	dof zinc finger protein DOF2.4-like [Prunus avium]	--
Pav_sc0001305.1_g900.1.mk	C2C2-Dof	0.274747	3.52594	3.5871	3.35e-18	2.14e-16	UP	dof zinc finger protein DOF1.4-like [Prunus avium]	--
Pav_sc0000087.1_g590.1.mk	C2C2-Dof	0.0811738	1.08445	3.6287	8.95e-05	0.00087702	UP	dof zinc finger protein DOF3.6-like [Prunus avium]	--
Pav_sc0001305.1_g870.1.mk	C2C2-Dof	0	0.338036	Inf	0.0068591	0.033049	UP	dof zinc finger protein DOF1.4-like [Prunus avium]	--
Pav_sc0001695.1_g180.1.mk	C2C2-CO-like	0.0728828	0.592277	2.9163	0.00025356	0.0021443	UP	PREDICTED: transcription initiation factor TFIID subunit 12-like isoform X1 [Prunus mume]	--
Novel00046	bZIP	0.422975	3.61501	2.9994	0.00042666	0.0033455	UP	transcription factor TGA7 isoform X3 [Prunus avium]	K14431|0|pmum:103332956|K14431 transcription factor TGA | (RefSeq) transcription factor TGA3
Pav_sc0000254.1_g320.1.mk	bZIP	14.5008	70.1808	2.1801	3.49e-09	8.67e-08	UP	common plant regulatory factor 1-like [Prunus avium]	K09060|0|pper:PRUPE_ppa006173mg|K09060 plant G-box-binding factor | (RefSeq) hypothetical protein
Pav_sc0001710.1_g1500.1.mk	bHLH	0.23846	1.68934	2.7535	3.55e-08	7.52e-07	UP	transcription factor bHLH68-like isoform X1 [Prunus avium]	--
Pav_sc0000652.1_g730.1.mk	bHLH	0.391786	2.92427	2.8084	1.1e-05	0.0001383	UP	transcription factor MYC2-like [Prunus avium]	--
Pav_sc0002584.1_g370.1.mk	bHLH	8.07035	0.174058	-5.6194	1.22e-69	8.42e-67	DOWN	transcription factor BHLH089 [Prunus avium]	--
Pav_sc0000269.1_g380.1.mk	bHLH	0.0159034	0.168906	3.3489	0.012466	0.053002	UP	transcription factor bHLH123-like [Prunus avium]	--
Pav_sc0001817.1_g050.1.mk	bHLH	6.9499	0	#NAME	1.93e-39	4.25e-37	DOWN	transcription factor bHLH131-like [Prunus avium]	--
Pav_sc0000700.1_g590.1.mk	bHLH	0.803015	0.174503	-2.2832	9.92e-05	0.00095601	DOWN	transcription factor bHLH94-like [Prunus avium]	--
Pav_sc0001107.1_g090.1.mk	bHLH	0.0380565	0.416605	3.346	0.0032251	0.017957	UP	transcription factor bHLH137-like [Prunus avium]	--
Pav_sc0000624.1_g1350.1.mk	bHLH	0.668647	3.91999	2.485	7.58e-05	0.00075684	UP	transcription factor bHLH35 [Prunus avium]	--
Pav_sc0001313.1_g380.1.mk	bHLH	1.08812	7.98039	2.7792	4.42e-09	1.08e-07	UP	transcription factor bHLH162-like [Prunus avium]	--
Pav_sc0001309.1_g720.1.mk	bHLH	0.156587	1.86827	3.4672	0.0068747	0.033092	UP	transcription factor bHLH162-like [Prunus avium]	--
Pav_sc0000618.1_g390.1.mk	B3-Domain	13.5315	1.86408	-2.9367	3.71e-07	6.51e-06	DOWN	PREDICTED: AP2/ERF and B3 domain-containing transcription repressor RAV2-like [Prunus mume]	K09287|5.33869e-98|pmum:103329663|K09287 RAV-like factor | (RefSeq) AP2/ERF and B3 domain-containing transcription repressor RAV2-like
Pav_sc0001196.1_g560.1.br	B3-Domain	0	1.72043	Inf	1.29e-05	0.00015896	UP	uncharacterized protein LOC110765763 [Prunus avium]	--
Novel00726	AS2-LOB	0.0588995	0.357448	2.5586	0.035101	0.1192	UP	PREDICTED: LOB domain-containing protein 4 isoform X1 [Malus domestica]	--
Pav_sc0001169.1_g190.1.mk	AS2-LOB	2.03807	0.354632	-2.6004	0.0029472	0.016655	DOWN	LOB domain-containing protein 29-like [Prunus avium]	K13945|1.03771e-28|pper:PRUPE_ppa025889mg|K13945 LOB domain-containing protein 29 | (RefSeq) hypothetical protein
Pav_sc0000600.1_g540.1.mk	AS2-LOB	38.1135	1.30719	-4.9533	1.94e-71	1.46e-68	DOWN	LOB domain-containing protein 29-like isoform X2 [Prunus avium]	K13945|1.20721e-59|pper:PRUPE_ppa025889mg|K13945 LOB domain-containing protein 29 | (RefSeq) hypothetical protein
Pav_sc0002360.1_g010.1.mk	AS2-LOB	253.767	10.5513	-4.6819	3.21e-134	1.6e-130	DOWN	LOB domain-containing protein 41 [Prunus avium]	--
Pav_sc0001102.1_g230.1.mk	AP2-EREBP	157.889	36.3372	-2.2118	5.1e-39	1.11e-36	DOWN	ethylene-responsive transcription factor ERF106-like isoform X2 [Prunus avium]	--
Pav_sc0000038.1_g350.1.mk	AP2-EREBP	0.0411784	1.65735	5.2538	1.03e-09	2.72e-08	UP	ethylene-responsive transcription factor ERF034-like [Prunus avium]	--
Pav_sc0000130.1_g780.1.mk	AP2-EREBP	130.766	15.6574	-3.1548	1.09e-69	7.74e-67	DOWN	ethylene-responsive transcription factor ERF071 [Prunus avium]	K09286|2.63938e-169|pper:PRUPE_ppa008730mg|K09286 EREBP-like factor | (RefSeq) hypothetical protein
Pav_sc0000502.1_g250.1.mk	AP2-EREBP	0	0.850511	Inf	0.0085408	0.039382	UP	ethylene-responsive transcription factor ERF022-like [Prunus avium]	--
Pav_sc0004456.1_g020.1.mk	AP2-EREBP	1.19336	6.82809	2.4263	4.33e-07	7.51e-06	UP	dehydration-responsive element-binding protein 2D [Prunus persica]	--
Pav_sc0001488.1_g330.1.mk	AP2-EREBP	0.466208	2.05634	2.0637	0.0088259	0.040404	UP	ethylene-responsive transcription factor ERF054-like [Prunus avium]	--
Pav_sc0000502.1_g400.1.mk	AP2-EREBP	0	0.42284	Inf	0.023475	0.087296	UP	ethylene-responsive transcription factor ERF020-like [Prunus avium]	--
Pav_sc0000381.1_g230.1.mk	AP2-EREBP	0.0120082	0.569928	5.4678	1.6e-05	0.00019288	UP	ethylene-responsive transcription factor ERF062 [Prunus avium]	--
Pav_sc0000502.1_g370.1.mk	AP2-EREBP	0.191425	3.11851	3.9332	0.0045067	0.023633	UP	ethylene-responsive transcription factor ERF021-like [Prunus avium]	--
GDF: Green Dapple Fruit
GHF: Green Healthy Fruit
fpkm: Expected number of Fragments Per Kilobase of transcript sequence per Millions base pairs sequenced
p-value: Statistical significance test index
padj: The corrected p-value
nr: RefSeq non-redundant proteins
KEGG: Kyoto Encyclopedia of Genes and Genomes
* Inf, Infinite (The denominator is zero.).
* #NAME, Not Applicable
