# Supplementary material for: Transcriptomic analysis reveals insights into the response to Hop stunt viroid (HSVd) in sweet cherry (Prunus avium L.) fruits
Source: PeerJ. 2020 Sep 21;8:e10005. doi: 10.7717/peerj.10005 (PMC7513744; doi:10.7717/peerj.10005)
Supplement: Supplemental Information 9 [file peerj-08-10005-s009.xls]

## Sheet: Raw1
Block Type	96fast
Chemistry	SYBR_GREEN
Experiment File Name
Experiment Run End Time
Instrument Type	sds7500fast
Passive Reference	ROX
Well	Sample Name	Target Name	Task	Reporter	Quencher	RQ	RQ Min	RQ Max	Cт	Cт Mean	Cт SD	ΔCт	ΔCт Mean	ΔCт SE	HK Control ΔCт Mean	HK Control ΔCт SE	ΔΔCт	Automatic Ct Threshold	Ct Threshold	Automatic Baseline	Baseline Start	Baseline End	Efficiency	Tm1	Tm2	Tm3	Comments
A1	hong-ck	actin	UNKNOWN	SYBR	None				25.9166	25.8317	0.0555268							TRUE	0.433008	TRUE	3	17	1	83.0394
A2	hong	actin	UNKNOWN	SYBR	None				21.1414	21.1325	0.0906745							TRUE	0.433008	TRUE	3	15	1	83.1925
B1	hong-ck	actin	UNKNOWN	SYBR	None				25.8296	25.8317	0.0555268							TRUE	0.433008	TRUE	3	19	1	83.0394
B2	hong	actin	UNKNOWN	SYBR	None				21.1131	21.1325	0.0906745							TRUE	0.433008	TRUE	3	15	1	83.1925
B11	hong-ck	actin	UNKNOWN	SYBR	None				25.7865	25.8317	0.0555268							TRUE	0.433008	TRUE	3	18	1	83.1925
B12	hong	actin	UNKNOWN	SYBR	None				21.0497	21.1325	0.0906745							TRUE	0.433008	TRUE	3	15	1	83.3455
C1	hong-ck	actin	UNKNOWN	SYBR	None				25.7374	25.8317	0.0555268							TRUE	0.433008	TRUE	3	17	1	83.0394
C2	hong	actin	UNKNOWN	SYBR	None				21.0351	21.1325	0.0906745							TRUE	0.433008	TRUE	3	15	1	83.3455
D1	hong-ck	actin	UNKNOWN	SYBR	None				25.8754	25.8317	0.0555268							TRUE	0.433008	TRUE	3	18	1	83.0394
D2	hong	actin	UNKNOWN	SYBR	None				21.3397	21.1325	0.0906745							TRUE	0.433008	TRUE	3	15	1	83.3455
E1	hong-ck	actin	UNKNOWN	SYBR	None				25.8242	25.8317	0.0555268							TRUE	0.433008	TRUE	3	17	1	83.1925
E2	hong	actin	UNKNOWN	SYBR	None				21.1152	21.1325	0.0906745							TRUE	0.433008	TRUE	3	15	1	83.3455
F1	hong-ck	actin	UNKNOWN	SYBR	None				25.8671	25.8317	0.0555268							TRUE	0.433008	TRUE	3	18	1	83.1925
F2	hong	actin	UNKNOWN	SYBR	None				21.0948	21.1325	0.0906745							TRUE	0.433008	TRUE	3	15	1	83.3455
G1	hong-ck	actin	UNKNOWN	SYBR	None				25.8754	25.8317	0.0555268							TRUE	0.433008	TRUE	3	18	1	83.0394
G2	hong	actin	UNKNOWN	SYBR	None				21.1939	21.1325	0.0906745							TRUE	0.433008	TRUE	3	15	1	83.1925
H1	hong-ck	actin	UNKNOWN	SYBR	None				25.8172	25.8317	0.0555268							TRUE	0.433008	TRUE	3	18	1	83.0394
H2	hong	actin	UNKNOWN	SYBR	None				21.1092	21.1325	0.0906745							TRUE	0.433008	TRUE	3	15	1	83.0394
A5	hong-ck	PAL	UNKNOWN	SYBR	None	1	0.888048	1.12606	31.0102	31.0328	0.247858		5.20109	0.0808006			0	TRUE	0.583707	TRUE	3	21	1	81.815
A6	hong	PAL	UNKNOWN	SYBR	None	1.35197	1.22786	1.48862	25.8791	25.8985	0.174423		4.76603	0.065528			-0.43506	TRUE	0.583707	TRUE	3	19	1	81.9681
A11	hong-ck	PAL	UNKNOWN	SYBR	None	1	0.888048	1.12606	31.0636	31.0328	0.247858		5.20109	0.0808006			0	TRUE	0.583707	TRUE	3	21	1	81.815
A12	hong	PAL	UNKNOWN	SYBR	None	1.35197	1.22786	1.48862	26.2782	25.8985	0.174423		4.76603	0.065528			-0.43506	TRUE	0.583707	TRUE	3	19	1	81.815
B5	hong-ck	PAL	UNKNOWN	SYBR	None	1	0.888048	1.12606	31.493	31.0328	0.247858		5.20109	0.0808006			0	TRUE	0.583707	TRUE	3	21	1	81.9681
B6	hong	PAL	UNKNOWN	SYBR	None	1.35197	1.22786	1.48862	25.8302	25.8985	0.174423		4.76603	0.065528			-0.43506	TRUE	0.583707	TRUE	3	19	1	82.1211
C5	hong-ck	PAL	UNKNOWN	SYBR	None	1	0.888048	1.12606	31.3388	31.0328	0.247858		5.20109	0.0808006			0	TRUE	0.583707	TRUE	3	21	1	81.9681
C6	hong	PAL	UNKNOWN	SYBR	None	1.35197	1.22786	1.48862	25.7344	25.8985	0.174423		4.76603	0.065528			-0.43506	TRUE	0.583707	TRUE	3	19	1	82.2742
D5	hong-ck	PAL	UNKNOWN	SYBR	None	1	0.888048	1.12606	31.0344	31.0328	0.247858		5.20109	0.0808006			0	TRUE	0.583707	TRUE	3	21	1	81.9681
D6	hong	PAL	UNKNOWN	SYBR	None	1.35197	1.22786	1.48862	25.8002	25.8985	0.174423		4.76603	0.065528			-0.43506	TRUE	0.583707	TRUE	3	19	1	82.2742
E5	hong-ck	PAL	UNKNOWN	SYBR	None	1	0.888048	1.12606	30.9492	31.0328	0.247858		5.20109	0.0808006			0	TRUE	0.583707	TRUE	3	23	1	82.1211
E6	hong	PAL	UNKNOWN	SYBR	None	1.35197	1.22786	1.48862	25.7053	25.8985	0.174423		4.76603	0.065528			-0.43506	TRUE	0.583707	TRUE	3	19	1	82.2742
F5	hong-ck	PAL	UNKNOWN	SYBR	None	1	0.888048	1.12606	30.9832	31.0328	0.247858		5.20109	0.0808006			0	TRUE	0.583707	TRUE	3	21	1	81.9681
F6	hong	PAL	UNKNOWN	SYBR	None	1.35197	1.22786	1.48862	25.8849	25.8985	0.174423		4.76603	0.065528			-0.43506	TRUE	0.583707	TRUE	3	19	1	82.2742
G5	hong-ck	PAL	UNKNOWN	SYBR	None	1	0.888048	1.12606	30.96	31.0328	0.247858		5.20109	0.0808006			0	TRUE	0.583707	TRUE	3	21	1	81.9681
G6	hong	PAL	UNKNOWN	SYBR	None	1.35197	1.22786	1.48862	25.9405	25.8985	0.174423		4.76603	0.065528			-0.43506	TRUE	0.583707	TRUE	3	19	1	82.1211
H5	hong-ck	PAL	UNKNOWN	SYBR	None	1	0.888048	1.12606	30.5622	31.0328	0.247858		5.20109	0.0808006			0	TRUE	0.583707	TRUE	3	20	1	81.662
H6	hong	PAL	UNKNOWN	SYBR	None	1.35197	1.22786	1.48862	26.0337	25.8985	0.174423		4.76603	0.065528			-0.43506	TRUE	0.583707	TRUE	3	19	1	81.9681
A7	hong-ck	PME	UNKNOWN	SYBR	None	1	0.931387	1.07367	36.8307	36.8706	0.0564296		11.0389	0.0444697			0	TRUE	0.417789	TRUE	3	25	1	82.4272
A8	hong	PME	UNKNOWN	SYBR	None	0.659707	0.577892	0.753106	32.7436	32.7715	0.254671		11.639	0.0901107			0.600102	TRUE	0.417789	TRUE	3	27	1	82.4272
B7	hong-ck	PME	UNKNOWN	SYBR	None	1	0.931387	1.07367	36.8307	36.8706	0.0564296		11.0389	0.0444697			0	TRUE	0.417789	TRUE	3	25	1	82.4272
B8	hong	PME	UNKNOWN	SYBR	None	0.659707	0.577892	0.753106	32.5635	32.7715	0.254671		11.639	0.0901107			0.600102	TRUE	0.417789	TRUE	3	27	1	82.5803
C7	hong-ck	PME	UNKNOWN	SYBR	None	1	0.931387	1.07367	36.8307	36.8706	0.0564296		11.0389	0.0444697			0	TRUE	0.417789	TRUE	3	25	1	82.4272
C8	hong	PME	UNKNOWN	SYBR	None	0.659707	0.577892	0.753106	32.5787	32.7715	0.254671		11.639	0.0901107			0.600102	TRUE	0.417789	TRUE	3	26	1	82.7333
D7	hong-ck	PME	UNKNOWN	SYBR	None	1	0.931387	1.07367	36.9105	36.8706	0.0564296		11.0389	0.0444697			0	TRUE	0.417789	TRUE	3	26	1	82.5803
D8	hong	PME	UNKNOWN	SYBR	None	0.659707	0.577892	0.753106	32.4644	32.7715	0.254671		11.639	0.0901107			0.600102	TRUE	0.417789	TRUE	3	26	1	82.7333
D11	hong-ck	PME	UNKNOWN	SYBR	None	1	0.931387	1.07367	36.9105	36.8706	0.0564296		11.0389	0.0444697			0	TRUE	0.417789	TRUE	3	26	1	82.5803
D12	hong	PME	UNKNOWN	SYBR	None	0.659707	0.577892	0.753106	32.9563	32.7715	0.254671		11.639	0.0901107			0.600102	TRUE	0.417789	TRUE	3	27	1	82.4272
E7	hong-ck	PME	UNKNOWN	SYBR	None	1	0.931387	1.07367	36.8307	36.8706	0.0564296		11.0389	0.0444697			0	TRUE	0.417789	TRUE	3	25	1	82.4272
E8	hong	PME	UNKNOWN	SYBR	None	0.659707	0.577892	0.753106	32.8445	32.7715	0.254671		11.639	0.0901107			0.600102	TRUE	0.417789	TRUE	3	27	1	82.7333
F7	hong-ck	PME	UNKNOWN	SYBR	None	1	0.931387	1.07367	36.9105	36.8706	0.0564296		11.0389	0.0444697			0	TRUE	0.417789	TRUE	3	26	1	82.5803
F8	hong	PME	UNKNOWN	SYBR	None	0.659707	0.577892	0.753106	33.2967	32.7715	0.254671		11.639	0.0901107			0.600102	TRUE	0.417789	TRUE	3	28	1	82.7333
G7	hong-ck	PME	UNKNOWN	SYBR	None	1	0.931387	1.07367	36.8307	36.8706	0.0564296		11.0389	0.0444697			0	TRUE	0.417789	TRUE	3	25	1	82.4272
G8	hong	PME	UNKNOWN	SYBR	None	0.659707	0.577892	0.753106	32.6317	32.7715	0.254671		11.639	0.0901107			0.600102	TRUE	0.417789	TRUE	3	27	1	82.5803
H7	hong-ck	PME	UNKNOWN	SYBR	None	1	0.931387	1.07367	36.9105	36.8706	0.0564296		11.0389	0.0444697			0	TRUE	0.417789	TRUE	3	26	1	82.5803
H8	hong	PME	UNKNOWN	SYBR	None	0.659707	0.577892	0.753106	32.8636	32.7715	0.254671		11.639	0.0901107			0.600102	TRUE	0.417789	TRUE	3	27	1	82.2742
A9	hong-ck	AUX	UNKNOWN	SYBR	None	1	0.934618	1.06996	32.7421	32.8479	0.0888537		7.0162	0.0443215			0	TRUE	0.863264	TRUE	3	23	1	79.5192
A10	hong	AUX	UNKNOWN	SYBR	None	0.372559	0.342625	0.405107	29.5756	29.5731	0.103977		8.44066	0.0554598			1.42446	TRUE	0.863264	TRUE	3	22	1	79.5192
B9	hong-ck	AUX	UNKNOWN	SYBR	None	1	0.934618	1.06996	32.9257	32.8479	0.0888537		7.0162	0.0443215			0	TRUE	0.863264	TRUE	3	22	1	79.6723
B10	hong	AUX	UNKNOWN	SYBR	None	0.372559	0.342625	0.405107	29.5851	29.5731	0.103977		8.44066	0.0554598			1.42446	TRUE	0.863264	TRUE	3	22	1	79.6723
C9	hong-ck	AUX	UNKNOWN	SYBR	None	1	0.934618	1.06996	32.9186	32.8479	0.0888537		7.0162	0.0443215			0	TRUE	0.863264	TRUE	3	23	1	79.3662
C10	hong	AUX	UNKNOWN	SYBR	None	0.372559	0.342625	0.405107	29.4959	29.5731	0.103977		8.44066	0.0554598			1.42446	TRUE	0.863264	TRUE	3	22	1	79.8253
D9	hong-ck	AUX	UNKNOWN	SYBR	None	1	0.934618	1.06996	32.8916	32.8479	0.0888537		7.0162	0.0443215			0	TRUE	0.863264	TRUE	3	23	1	79.6723
D10	hong	AUX	UNKNOWN	SYBR	None	0.372559	0.342625	0.405107	29.4719	29.5731	0.103977		8.44066	0.0554598			1.42446	TRUE	0.863264	TRUE	3	22	1	79.8253
E9	hong-ck	AUX	UNKNOWN	SYBR	None	1	0.934618	1.06996	32.7618	32.8479	0.0888537		7.0162	0.0443215			0	TRUE	0.863264	TRUE	3	23	1	79.8253
E10	hong	AUX	UNKNOWN	SYBR	None	0.372559	0.342625	0.405107	29.7371	29.5731	0.103977		8.44066	0.0554598			1.42446	TRUE	0.863264	TRUE	3	22	1	79.6723
E11	hong-ck	AUX	UNKNOWN	SYBR	None	1	0.934618	1.06996	32.9257	32.8479	0.0888537		7.0162	0.0443215			0	TRUE	0.863264	TRUE	3	22	1	79.6723
E12	hong	AUX	UNKNOWN	SYBR	None	0.372559	0.342625	0.405107	29.4959	29.5731	0.103977		8.44066	0.0554598			1.42446	TRUE	0.863264	TRUE	3	22	1	79.8253
F9	hong-ck	AUX	UNKNOWN	SYBR	None	1	0.934618	1.06996	32.8916	32.8479	0.0888537		7.0162	0.0443215			0	TRUE	0.863264	TRUE	3	23	1	79.6723
F10	hong	AUX	UNKNOWN	SYBR	None	0.372559	0.342625	0.405107	29.4719	29.5731	0.103977		8.44066	0.0554598			1.42446	TRUE	0.863264	TRUE	3	22	1	79.8253
G9	hong-ck	AUX	UNKNOWN	SYBR	None	1	0.934618	1.06996	32.7421	32.8479	0.0888537		7.0162	0.0443215			0	TRUE	0.863264	TRUE	3	23	1	79.5192
G10	hong	AUX	UNKNOWN	SYBR	None	0.372559	0.342625	0.405107	29.5756	29.5731	0.103977		8.44066	0.0554598			1.42446	TRUE	0.863264	TRUE	3	22	1	79.5192
H9	hong-ck	AUX	UNKNOWN	SYBR	None	1	0.934618	1.06996	32.9186	32.8479	0.0888537		7.0162	0.0443215			0	TRUE	0.863264	TRUE	3	23	1	79.3662
H10	hong	AUX	UNKNOWN	SYBR	None	0.372559	0.342625	0.405107	29.7371	29.5731	0.103977		8.44066	0.0554598			1.42446	TRUE	0.863264	TRUE	3	22	1	79.6723
Analysis Type	Singleplex
Endogenous Control	actin
RQ Min/Max Confidence Level	95.0
Reference Sample	hong-ck

## Sheet: Raw2
Block Type	96fast
Chemistry	SYBR_GREEN
Experiment File Name
Experiment Run End Time	Not Started
Instrument Type	sds7500fast
Passive Reference	ROX
Well	Sample Name	Target Name	Task	Reporter	Quencher	RQ	RQ Min	RQ Max	Cт	Cт Mean	Cт SD	ΔCт	ΔCт Mean	ΔCт SE	HK Control ΔCт Mean	HK Control ΔCт SE	ΔΔCт	Automatic Ct Threshold	Ct Threshold	Automatic Baseline	Baseline Start	Baseline End	Efficiency	Tm1	Tm2	Tm3	Comments	HIGHSD	OUTLIERRG
A2	hong-ck	actin	UNKNOWN	SYBR	None				21.169	22.0161	0.432545							TRUE	0.516943	TRUE	1	2	1	82.8972				N	N
A3	hong-ck	actin	UNKNOWN	SYBR	None				21.9919	22.0161	0.432545							TRUE	0.516943	TRUE	1	2	1	83.0531				N	N
A4	hong-ck	actin	UNKNOWN	SYBR	None				22.8148	22.0161	0.432545							TRUE	0.516943	TRUE	1	2	1	83.209				N	N
A5	hong-ck	actin	UNKNOWN	SYBR	None				22.0335	22.0161	0.432545							TRUE	0.516943	TRUE	1	2	1	83.209				N	N
A6	hong-ck	actin	UNKNOWN	SYBR	None				21.8935	22.0161	0.432545							TRUE	0.516943	TRUE	1	2	1	83.209				N	N
A8	hong-ck	actin	UNKNOWN	SYBR	None				22.1402	22.0161	0.432545							TRUE	0.516943	TRUE	1	2	1	83.209				N	N
A9	hong-ck	actin	UNKNOWN	SYBR	None				22.515	22.0161	0.432545							TRUE	0.516943	TRUE	1	2	1	83.209				N	N
A10	hong-ck	actin	UNKNOWN	SYBR	None				22.5683	22.0161	0.432545							TRUE	0.516943	TRUE	1	2	1	83.209				N	N
A12	hong-ck	actin	UNKNOWN	SYBR	None				22.3694	22.0161	0.432545							TRUE	0.516943	TRUE	1	2	1	82.8972				N	N
B2	hong	actin	UNKNOWN	SYBR	None				20.9212	21.7578	0.444							TRUE	0.516943	TRUE	3	15	1	83.0531				N	N
B3	hong	actin	UNKNOWN	SYBR	None				22.1297	21.7578	0.444							TRUE	0.516943	TRUE	3	15	1	83.0531				N	N
B4	hong	actin	UNKNOWN	SYBR	None				21.1831	21.7578	0.444							TRUE	0.516943	TRUE	3	15	1	83.3649				N	N
B5	hong	actin	UNKNOWN	SYBR	None				21.9888	21.7578	0.444							TRUE	0.516943	TRUE	3	15	1	83.209				N	N
B6	hong	actin	UNKNOWN	SYBR	None				21.9541	21.7578	0.444							TRUE	0.516943	TRUE	3	15	1	83.3649				N	N
B8	hong	actin	UNKNOWN	SYBR	None				21.5257	21.7578	0.444							TRUE	0.516943	TRUE	3	15	1	83.3649				N	N
B9	hong	actin	UNKNOWN	SYBR	None				22.0772	21.7578	0.444							TRUE	0.516943	TRUE	3	16	1	83.209				N	N
B10	hong	actin	UNKNOWN	SYBR	None				21.9133	21.7578	0.444							TRUE	0.516943	TRUE	3	16	1	83.209				N	N
B11	hong	actin	UNKNOWN	SYBR	None				22.1275	21.7578	0.444							TRUE	0.516943	TRUE	3	16	1	83.209				N	N
G1	hong-ck	CYP98A	UNKNOWN	SYBR	None	1	0.702168	1.42416	31.5715	31.8351	0.358372		9.81907	0.228941			0	TRUE	0.261695	TRUE	3	15	1	74.7891				N	N
G2	hong-ck	CYP98A	UNKNOWN	SYBR	None	1	0.702168	1.42416	31.6614	31.8351	0.358372		9.81907	0.228941			0	TRUE	0.261695	TRUE	3	17	1	77.2839				N	N
G3	hong-ck	CYP98A	UNKNOWN	SYBR	None	1	0.702168	1.42416	32.3903	31.8351	0.358372		9.81907	0.228941			0	TRUE	0.261695	TRUE	3	12	1	76.8161				N	N
G4	hong-ck	CYP98A	UNKNOWN	SYBR	None	1	0.702168	1.42416	32.6932	31.8351	0.358372		9.81907	0.228941			0	TRUE	0.261695	TRUE	3	12	1	78.3234				N	N
G5	hong-ck	CYP98A	UNKNOWN	SYBR	None	1	0.702168	1.42416	31.5539	31.8351	0.358372		9.81907	0.228941			0	TRUE	0.261695	TRUE	3	19	1	75.7246				N	N
G6	hong-ck	CYP98A	UNKNOWN	SYBR	None	1	0.702168	1.42416	32.0698	31.8351	0.358372		9.81907	0.228941			0	TRUE	0.261695	TRUE	3	12	1	76.8161				N	N
G7	hong-ck	CYP98A	UNKNOWN	SYBR	None	1	0.702168	1.42416	31.9986	31.8351	0.358372		9.81907	0.228941			0	TRUE	0.261695	TRUE	3	15	1	72.2943				N	N
G10	hong-ck	CYP98A	UNKNOWN	SYBR	None	1	0.702168	1.42416	31.6614	31.8351	0.358372		9.81907	0.228941			0	TRUE	0.261695	TRUE	3	17	1	77.2839				N	N
G11	hong-ck	CYP98A	UNKNOWN	SYBR	None	1	0.702168	1.42416	31.5539	31.8351	0.358372		9.81907	0.228941			0	TRUE	0.261695	TRUE	3	19	1	75.7246				N	N
H1	hong	CYP98A	UNKNOWN	SYBR	None	4.02781	2.92316	5.54991	28.8227	29.5669	0.448763		7.80907	0.216974			-2.01	TRUE	0.261695	TRUE	3	22	1	76.6602				N	N
H2	hong	CYP98A	UNKNOWN	SYBR	None	4.02781	2.92316	5.54991	29.6854	29.5669	0.448763		7.80907	0.216974			-2.01	TRUE	0.261695	TRUE	3	24	1	77.128				N	N
H3	hong	CYP98A	UNKNOWN	SYBR	None	4.02781	2.92316	5.54991	29.867	29.5669	0.448763		7.80907	0.216974			-2.01	TRUE	0.261695	TRUE	3	23	1	76.972				N	N
H4	hong	CYP98A	UNKNOWN	SYBR	None	4.02781	2.92316	5.54991	29.6169	29.5669	0.448763		7.80907	0.216974			-2.01	TRUE	0.261695	TRUE	3	24	1	77.4398				N	N
H5	hong	CYP98A	UNKNOWN	SYBR	None	4.02781	2.92316	5.54991	30.1782	29.5669	0.448763		7.80907	0.216974			-2.01	TRUE	0.261695	TRUE	3	23	1	77.2839				N	N
H6	hong	CYP98A	UNKNOWN	SYBR	None	4.02781	2.92316	5.54991	29.8917	29.5669	0.448763		7.80907	0.216974			-2.01	TRUE	0.261695	TRUE	3	23	1	76.8161				N	N
H7	hong	CYP98A	UNKNOWN	SYBR	None	4.02781	2.92316	5.54991	29.3982	29.5669	0.448763		7.80907	0.216974			-2.01	TRUE	0.261695	TRUE	3	24	1	79.155				N	N
H8	hong	CYP98A	UNKNOWN	SYBR	None	4.02781	2.92316	5.54991	29.9872	29.5669	0.448763		7.80907	0.216974			-2.01	TRUE	0.261695	TRUE	3	24	1	79.155				N	N
H11	hong	CYP98A	UNKNOWN	SYBR	None	4.02781	2.92316	5.54991	29.0753	29.5669	0.448763		7.80907	0.216974			-2.01	TRUE	0.261695	TRUE	3	22	1	77.128				N	N
Analysis Type	Singleplex
Endogenous Control	actin
RQ Min/Max Confidence Level	95.0
Reference Sample	hong-ck

## Sheet: Raw3
Block Type	96fast
Chemistry	SYBR_GREEN
Experiment File Name
Experiment Run End Time	Not Started
Instrument Type	sds7500fast
Passive Reference	ROX
Well	Sample Name	Target Name	Task	Reporter	Quencher	RQ	RQ Min	RQ Max	Cт	Cт Mean	Cт SD	ΔCт	ΔCт Mean	ΔCт SE	HK Control ΔCт Mean	HK Control ΔCт SE	ΔΔCт	Automatic Ct Threshold	Ct Threshold	Automatic Baseline	Baseline Start	Baseline End	Efficiency	Tm1	Tm2	Tm3	Comments
A1	hong	actin	UNKNOWN	SYBR	None				26.9234	26.9935	0.061307							TRUE	0.524226	TRUE	3	20	1	82.9393
A2	hong-ck	actin	UNKNOWN	SYBR	None				21.333	21.2664	0.0354204							TRUE	0.524226	TRUE	3	14	1	82.9393
A11	hong	actin	UNKNOWN	SYBR	None				26.9496	26.9935	0.061307							TRUE	0.524226	TRUE	3	20	1	83.0938
A12	hong-ck	actin	UNKNOWN	SYBR	None				21.3097	21.2664	0.0354204							TRUE	0.524226	TRUE	3	14	1	83.2483
B1	hong	actin	UNKNOWN	SYBR	None				26.9605	26.9935	0.061307							TRUE	0.524226	TRUE	3	19	1	82.9393
B2	hong-ck	actin	UNKNOWN	SYBR	None				21.2587	21.2664	0.0354204							TRUE	0.524226	TRUE	3	15	1	83.0938
C1	hong	actin	UNKNOWN	SYBR	None				26.9302	26.9935	0.061307							TRUE	0.524226	TRUE	3	20	1	83.0938
C2	hong-ck	actin	UNKNOWN	SYBR	None				21.2773	21.2664	0.0354204							TRUE	0.524226	TRUE	3	15	1	83.2483
D1	hong	actin	UNKNOWN	SYBR	None				26.9764	26.9935	0.061307							TRUE	0.524226	TRUE	3	20	1	83.0938
D2	hong-ck	actin	UNKNOWN	SYBR	None				21.2415	21.2664	0.0354204							TRUE	0.524226	TRUE	3	15	1	83.2483
E1	hong	actin	UNKNOWN	SYBR	None				26.9977	26.9935	0.061307							TRUE	0.524226	TRUE	3	20	1	83.0938
E2	hong-ck	actin	UNKNOWN	SYBR	None				21.2714	21.2664	0.0354204							TRUE	0.524226	TRUE	3	15	1	83.2483
F1	hong	actin	UNKNOWN	SYBR	None				27.0959	26.9935	0.061307							TRUE	0.524226	TRUE	3	20	1	83.0938
F2	hong-ck	actin	UNKNOWN	SYBR	None				21.2393	21.2664	0.0354204							TRUE	0.524226	TRUE	3	15	1	83.2483
G1	hong	actin	UNKNOWN	SYBR	None				27.0495	26.9935	0.061307							TRUE	0.524226	TRUE	3	20	1	82.9393
G2	hong-ck	actin	UNKNOWN	SYBR	None				21.2354	21.2664	0.0354204							TRUE	0.524226	TRUE	3	15	1	83.0938
H1	hong	actin	UNKNOWN	SYBR	None				27.0583	26.9935	0.061307							TRUE	0.524226	TRUE	3	19	1	83.2483
H2	hong-ck	actin	UNKNOWN	SYBR	None				21.2316	21.2664	0.0354204							TRUE	0.524226	TRUE	3	15	1	82.9393
A3	hong	CHI	UNKNOWN	SYBR	None	0.865939	0.640684	1.17039	36.0488	36.5636	0.392843		9.5701	0.197482			0.207662	TRUE	0.424423	TRUE	3	28	1	78.9223
A4	hong-ck	CHI	UNKNOWN	SYBR	None	1	0.866744	1.15374	30.9486	30.6289	0.289823		9.36244	0.0973264			0	TRUE	0.424423	TRUE	3	25	1	79.3858
B3	hong	CHI	UNKNOWN	SYBR	None	0.865939	0.640684	1.17039	36.9566	36.5636	0.392843		9.5701	0.197482			0.207662	TRUE	0.424423	TRUE	3	29	1	79.2313
B4	hong-ck	CHI	UNKNOWN	SYBR	None	1	0.866744	1.15374	30.5113	30.6289	0.289823		9.36244	0.0973264			0	TRUE	0.424423	TRUE	3	25	1	79.5403
C3	hong	CHI	UNKNOWN	SYBR	None	0.865939	0.640684	1.17039	36.4902	36.5636	0.392843		9.5701	0.197482			0.207662	TRUE	0.424423	TRUE	3	28	1	79.2313
C4	hong-ck	CHI	UNKNOWN	SYBR	None	1	0.866744	1.15374	30.6277	30.6289	0.289823		9.36244	0.0973264			0	TRUE	0.424423	TRUE	3	25	1	79.6948
D3	hong	CHI	UNKNOWN	SYBR	None	0.865939	0.640684	1.17039	36.0488	36.5636	0.392843		9.5701	0.197482			0.207662	TRUE	0.424423	TRUE	3	28	1	78.9223
D4	hong-ck	CHI	UNKNOWN	SYBR	None	1	0.866744	1.15374	30.4595	30.6289	0.289823		9.36244	0.0973264			0	TRUE	0.424423	TRUE	3	24	1	79.6948
E3	hong	CHI	UNKNOWN	SYBR	None	0.865939	0.640684	1.17039	36.7588	36.5636	0.392843		9.5701	0.197482			0.207662	TRUE	0.424423	TRUE	3	30	1	79.3858
E4	hong-ck	CHI	UNKNOWN	SYBR	None	1	0.866744	1.15374	31.0399	30.6289	0.289823		9.36244	0.0973264			0	TRUE	0.424423	TRUE	3	25	1	79.6948
E11	hong	CHI	UNKNOWN	SYBR	None	0.865939	0.640684	1.17039	36.0488	36.5636	0.392843		9.5701	0.197482			0.207662	TRUE	0.424423	TRUE	3	28	1	78.9223
E12	hong-ck	CHI	UNKNOWN	SYBR	None	1	0.866744	1.15374	30.0492	30.6289	0.289823		9.36244	0.0973264			0	TRUE	0.424423	TRUE	3	24	1	79.6948
F3	hong	CHI	UNKNOWN	SYBR	None	0.865939	0.640684	1.17039	36.7588	36.5636	0.392843		9.5701	0.197482			0.207662	TRUE	0.424423	TRUE	3	30	1	79.3858
F4	hong-ck	CHI	UNKNOWN	SYBR	None	1	0.866744	1.15374	30.7128	30.6289	0.289823		9.36244	0.0973264			0	TRUE	0.424423	TRUE	3	25	1	79.6948
G3	hong	CHI	UNKNOWN	SYBR	None	0.865939	0.640684	1.17039	36.4902	36.5636	0.392843		9.5701	0.197482			0.207662	TRUE	0.424423	TRUE	3	28	1	79.2313
G4	hong-ck	CHI	UNKNOWN	SYBR	None	1	0.866744	1.15374	30.5722	30.6289	0.289823		9.36244	0.0973264			0	TRUE	0.424423	TRUE	3	25	1	79.5403
H3	hong	CHI	UNKNOWN	SYBR	None	0.865939	0.640684	1.17039	36.9566	36.5636	0.392843		9.5701	0.197482			0.207662	TRUE	0.424423	TRUE	3	29	1	79.2313
H4	hong-ck	CHI	UNKNOWN	SYBR	None	1	0.866744	1.15374	30.7386	30.6289	0.289823		9.36244	0.0973264			0	TRUE	0.424423	TRUE	3	25	1	79.3858
Analysis Type	Singleplex
Endogenous Control	actin
RQ Min/Max Confidence Level	95.0
Reference Sample	hong-ck

## Sheet: Raw4
Block Type	96fast
Chemistry	SYBR_GREEN
Experiment File Name
Experiment Run End Time	Not Started
Instrument Type	sds7500fast
Passive Reference	ROX
Well	Sample Name	Target Name	Task	Reporter	Quencher	RQ	RQ Min	RQ Max	Cт	Cт Mean	Cт SD	ΔCт	ΔCт Mean	ΔCт SE	HK Control ΔCт Mean	HK Control ΔCт SE	ΔΔCт	Automatic Ct Threshold	Ct Threshold	Automatic Baseline	Baseline Start	Baseline End	Efficiency	Tm1	Tm2	Tm3	Comments
A1	hong	actin	UNKNOWN	SYBR	None				21.6531	21.6465	0.0272908							TRUE	0.690425	TRUE	3	15	1	83.3341
A2	hong-ck	actin	UNKNOWN	SYBR	None				25.8375	25.8538	0.0373272							TRUE	0.690425	TRUE	3	15	1	83.1777
A11	hong	actin	UNKNOWN	SYBR	None				21.6458	21.6465	0.0272908							TRUE	0.690425	TRUE	3	15	1	83.1777
A12	hong-ck	actin	UNKNOWN	SYBR	None				25.8267	25.8538	0.0373272							TRUE	0.690425	TRUE	3	18	1	83.1777
B11	hong	actin	UNKNOWN	SYBR	None				21.6722	21.6465	0.0272908							TRUE	0.690425	TRUE	3	15	1	83.3341
B12	hong-ck	actin	UNKNOWN	SYBR	None				25.8449	25.8538	0.0373272							TRUE	0.690425	TRUE	3	16	1	83.1777
C11	hong	actin	UNKNOWN	SYBR	None				21.6572	21.6465	0.0272908							TRUE	0.690425	TRUE	3	15	1	83.4905
C12	hong-ck	actin	UNKNOWN	SYBR	None				25.7995	25.8538	0.0373272							TRUE	0.690425	TRUE	3	16	1	83.3341
D11	hong	actin	UNKNOWN	SYBR	None				21.655	21.6465	0.0272908							TRUE	0.690425	TRUE	3	15	1	83.4905
D12	hong-ck	actin	UNKNOWN	SYBR	None				25.8399	25.8538	0.0373272							TRUE	0.690425	TRUE	3	16	1	83.3341
E11	hong	actin	UNKNOWN	SYBR	None				21.6769	21.6465	0.0272908							TRUE	0.690425	TRUE	3	15	1	83.4905
E12	hong-ck	actin	UNKNOWN	SYBR	None				25.8829	25.8538	0.0373272							TRUE	0.690425	TRUE	3	16	1	83.3341
F11	hong	actin	UNKNOWN	SYBR	None				21.6552	21.6465	0.0272908							TRUE	0.690425	TRUE	3	15	1	83.4905
F12	hong-ck	actin	UNKNOWN	SYBR	None				25.8471	25.8538	0.0373272							TRUE	0.690425	TRUE	3	15	1	83.3341
G11	hong	actin	UNKNOWN	SYBR	None				21.6063	21.6465	0.0272908							TRUE	0.690425	TRUE	3	15	1	83.3341
G12	hong-ck	actin	UNKNOWN	SYBR	None				25.9276	25.8538	0.0373272							TRUE	0.690425	TRUE	3	16	1	83.1777
H11	hong	actin	UNKNOWN	SYBR	None				21.597	21.6465	0.0272908							TRUE	0.690425	TRUE	3	15	1	83.1777
H12	hong-ck	actin	UNKNOWN	SYBR	None				25.8781	25.8538	0.0373272							TRUE	0.690425	TRUE	3	13	1	83.1777
A9	hong	CBDAS	UNKNOWN	SYBR	None	1.88229	1.7107	2.07109	30.9993	31.1706	0.193237		9.52407	0.0650515			-0.912489	TRUE	0.675928	TRUE	3	24	1	79.5806
A10	hong-ck	CBDAS	UNKNOWN	SYBR	None	1	0.73701	1.35683	35.9367	36.2904	0.399267		10.4366	0.200021			0	TRUE	0.675928	TRUE	3	27	1	79.737
B9	hong	CBDAS	UNKNOWN	SYBR	None	1.88229	1.7107	2.07109	30.9896	31.1706	0.193237		9.52407	0.0650515			-0.912489	TRUE	0.675928	TRUE	3	24	1	79.8934
B10	hong-ck	CBDAS	UNKNOWN	SYBR	None	1	0.73701	1.35683	36.6402	36.2904	0.399267		10.4366	0.200021			0	TRUE	0.675928	TRUE	3	28	1	79.5806
C9	hong	CBDAS	UNKNOWN	SYBR	None	1.88229	1.7107	2.07109	31.4968	31.1706	0.193237		9.52407	0.0650515			-0.912489	TRUE	0.675928	TRUE	3	25	1	79.8934
C10	hong-ck	CBDAS	UNKNOWN	SYBR	None	1	0.73701	1.35683	36.632	36.2904	0.399267		10.4366	0.200021			0	TRUE	0.675928	TRUE	3	28	1	79.5806
D1	hong	CBDAS	UNKNOWN	SYBR	None	1.88229	1.7107	2.07109	31.0929	31.1706	0.193237		9.52407	0.0650515			-0.912489	TRUE	0.675928	TRUE	3	25	1	79.737
D2	hong-ck	CBDAS	UNKNOWN	SYBR	None	1	0.73701	1.35683	36.6402	36.2904	0.399267		10.4366	0.200021			0	TRUE	0.675928	TRUE	3	28	1	79.5806
D9	hong	CBDAS	UNKNOWN	SYBR	None	1.88229	1.7107	2.07109	31.0021	31.1706	0.193237		9.52407	0.0650515			-0.912489	TRUE	0.675928	TRUE	3	24	1	80.0498
D10	hong-ck	CBDAS	UNKNOWN	SYBR	None	1	0.73701	1.35683	35.9367	36.2904	0.399267		10.4366	0.200021			0	TRUE	0.675928	TRUE	3	27	1	79.737
E9	hong	CBDAS	UNKNOWN	SYBR	None	1.88229	1.7107	2.07109	31.2957	31.1706	0.193237		9.52407	0.0650515			-0.912489	TRUE	0.675928	TRUE	3	25	1	80.0498
E10	hong-ck	CBDAS	UNKNOWN	SYBR	None	1	0.73701	1.35683	35.9526	36.2904	0.399267		10.4366	0.200021			0	TRUE	0.675928	TRUE	3	24	1	79.5806
F9	hong	CBDAS	UNKNOWN	SYBR	None	1.88229	1.7107	2.07109	31.0077	31.1706	0.193237		9.52407	0.0650515			-0.912489	TRUE	0.675928	TRUE	3	24	1	80.0498
F10	hong-ck	CBDAS	UNKNOWN	SYBR	None	1	0.73701	1.35683	36.632	36.2904	0.399267		10.4366	0.200021			0	TRUE	0.675928	TRUE	3	28	1	79.5806
G9	hong	CBDAS	UNKNOWN	SYBR	None	1.88229	1.7107	2.07109	31.3782	31.1706	0.193237		9.52407	0.0650515			-0.912489	TRUE	0.675928	TRUE	3	25	1	79.8934
G10	hong-ck	CBDAS	UNKNOWN	SYBR	None	1	0.73701	1.35683	35.9526	36.2904	0.399267		10.4366	0.200021			0	TRUE	0.675928	TRUE	3	24	1	79.5806
H9	hong	CBDAS	UNKNOWN	SYBR	None	1.88229	1.7107	2.07109	31.2729	31.1706	0.193237		9.52407	0.0650515			-0.912489	TRUE	0.675928	TRUE	3	25	1	79.5806
H10	hong-ck	CBDAS	UNKNOWN	SYBR	None	1	0.73701	1.35683	35.9367	36.2904	0.399267		10.4366	0.200021			0	TRUE	0.675928	TRUE	3	27	1	79.737
Analysis Type	Singleplex
Endogenous Control	actin
RQ Min/Max Confidence Level	95.0
Reference Sample	hong-ck

## Sheet: Raw5
Block Type	96fast
Chemistry	SYBR_GREEN
Experiment File Name
Experiment Run End Time	Not Started
Instrument Type	sds7500fast
Passive Reference	ROX
Well	Sample Name	Target Name	Task	Reporter	Quencher	RQ	RQ Min	RQ Max	Cт	Cт Mean	Cт SD	ΔCт	ΔCт Mean	ΔCт SE	HK Control ΔCт Mean	HK Control ΔCт SE	ΔΔCт	Automatic Ct Threshold	Ct Threshold	Automatic Baseline	Baseline Start	Baseline End	Efficiency	Tm1	Tm2	Tm3	Comments	HIGHSD
A1	hong	actin	UNKNOWN	SYBR	None				24.9106	24.8794	0.0562236							TRUE	0.515298	TRUE	3	15	1	83.0394				N
A2	hong-ck	actin	UNKNOWN	SYBR	None				21.254	21.2443	0.0617839							TRUE	0.515298	TRUE	3	15	1	83.1925				N
A11	hong	actin	UNKNOWN	SYBR	None				24.9098	24.8794	0.0562236							TRUE	0.515298	TRUE	3	16	1	83.1925				N
A12	hong-ck	actin	UNKNOWN	SYBR	None				21.3736	21.2443	0.0617839							TRUE	0.515298	TRUE	3	15	1	83.3455				N
B1	hong	actin	UNKNOWN	SYBR	None				24.9223	24.8794	0.0562236							TRUE	0.515298	TRUE	3	15	1	83.1925				N
B2	hong-ck	actin	UNKNOWN	SYBR	None				21.1947	21.2443	0.0617839							TRUE	0.515298	TRUE	3	15	1	83.3455				N
C1	hong	actin	UNKNOWN	SYBR	None				24.8964	24.8794	0.0562236							TRUE	0.515298	TRUE	3	16	1	83.1925				N
C2	hong-ck	actin	UNKNOWN	SYBR	None				21.225	21.2443	0.0617839							TRUE	0.515298	TRUE	3	15	1	83.3455				N
D1	hong	actin	UNKNOWN	SYBR	None				24.8845	24.8794	0.0562236							TRUE	0.515298	TRUE	3	15	1	83.1925				N
D2	hong-ck	actin	UNKNOWN	SYBR	None				21.1569	21.2443	0.0617839							TRUE	0.515298	TRUE	3	14	1	83.3455				N
E1	hong	actin	UNKNOWN	SYBR	None				24.8687	24.8794	0.0562236							TRUE	0.515298	TRUE	3	15	1	83.1925				N
E2	hong-ck	actin	UNKNOWN	SYBR	None				21.2055	21.2443	0.0617839							TRUE	0.515298	TRUE	3	15	1	83.3455				N
F1	hong	actin	UNKNOWN	SYBR	None				24.9457	24.8794	0.0562236							TRUE	0.515298	TRUE	3	15	1	83.0394				N
F2	hong-ck	actin	UNKNOWN	SYBR	None				21.2595	21.2443	0.0617839							TRUE	0.515298	TRUE	3	15	1	83.3455				N
G1	hong	actin	UNKNOWN	SYBR	None				24.7958	24.8794	0.0562236							TRUE	0.515298	TRUE	3	15	1	83.0394				N
G2	hong-ck	actin	UNKNOWN	SYBR	None				21.2466	21.2443	0.0617839							TRUE	0.515298	TRUE	3	15	1	83.1925				N
H1	hong	actin	UNKNOWN	SYBR	None				24.7808	24.8794	0.0562236							TRUE	0.515298	TRUE	3	15	1	83.0394				N
H2	hong-ck	actin	UNKNOWN	SYBR	None				21.2833	21.2443	0.0617839							TRUE	0.515298	TRUE	3	15	1	83.0394				N
A7	hong	CPK	UNKNOWN	SYBR	None	1.31165	1.16823	1.47267	30.6309	30.711	0.229631		5.83158	0.0788045			-0.39138	TRUE	0.495894	TRUE	3	20	1	80.5906				N
A8	hong-ck	CPK	UNKNOWN	SYBR	None	1	0.933917	1.07076	27.4486	27.4673	0.125165		6.22296	0.0465277			0	TRUE	0.495894	TRUE	3	21	1	80.5906				N
B7	hong	CPK	UNKNOWN	SYBR	None	1.31165	1.16823	1.47267	31.1225	30.711	0.229631		5.83158	0.0788045			-0.39138	TRUE	0.495894	TRUE	3	20	1	80.7437				N
B8	hong-ck	CPK	UNKNOWN	SYBR	None	1	0.933917	1.07076	27.3581	27.4673	0.125165		6.22296	0.0465277			0	TRUE	0.495894	TRUE	3	21	1	80.7437				N
C7	hong	CPK	UNKNOWN	SYBR	None	1.31165	1.16823	1.47267	30.6169	30.711	0.229631		5.83158	0.0788045			-0.39138	TRUE	0.495894	TRUE	3	19	1	80.8967				N
C8	hong-ck	CPK	UNKNOWN	SYBR	None	1	0.933917	1.07076	27.4492	27.4673	0.125165		6.22296	0.0465277			0	TRUE	0.495894	TRUE	3	21	1	80.8967				N
D7	hong	CPK	UNKNOWN	SYBR	None	1.31165	1.16823	1.47267	30.812	30.711	0.229631		5.83158	0.0788045			-0.39138	TRUE	0.495894	TRUE	3	17	1	80.8967				N
D8	hong-ck	CPK	UNKNOWN	SYBR	None	1	0.933917	1.07076	27.3406	27.4673	0.125165		6.22296	0.0465277			0	TRUE	0.495894	TRUE	3	21	1	80.8967				N
E7	hong	CPK	UNKNOWN	SYBR	None	1.31165	1.16823	1.47267	30.3014	30.711	0.229631		5.83158	0.0788045			-0.39138	TRUE	0.495894	TRUE	3	17	1	80.8967				N
E8	hong-ck	CPK	UNKNOWN	SYBR	None	1	0.933917	1.07076	27.2981	27.4673	0.125165		6.22296	0.0465277			0	TRUE	0.495894	TRUE	3	21	1	80.8967				N
F7	hong	CPK	UNKNOWN	SYBR	None	1.31165	1.16823	1.47267	30.5902	30.711	0.229631		5.83158	0.0788045			-0.39138	TRUE	0.495894	TRUE	3	21	1	80.7437				N
F8	hong-ck	CPK	UNKNOWN	SYBR	None	1	0.933917	1.07076	27.473	27.4673	0.125165		6.22296	0.0465277			0	TRUE	0.495894	TRUE	3	21	1	80.7437				N
G7	hong	CPK	UNKNOWN	SYBR	None	1.31165	1.16823	1.47267	30.6308	30.711	0.229631		5.83158	0.0788045			-0.39138	TRUE	0.495894	TRUE	3	19	1	80.5906				N
G8	hong-ck	CPK	UNKNOWN	SYBR	None	1	0.933917	1.07076	27.6356	27.4673	0.125165		6.22296	0.0465277			0	TRUE	0.495894	TRUE	3	21	1	80.7437				N
G11	hong	CPK	UNKNOWN	SYBR	None	1.31165	1.16823	1.47267	30.8228	30.711	0.229631		5.83158	0.0788045			-0.39138	TRUE	0.495894	TRUE	3	22	1	80.5906				N
G12	hong-ck	CPK	UNKNOWN	SYBR	None	1	0.933917	1.07076	27.6451	27.4673	0.125165		6.22296	0.0465277			0	TRUE	0.495894	TRUE	3	22	1	80.4376				N
H7	hong	CPK	UNKNOWN	SYBR	None	1.31165	1.16823	1.47267	30.8715	30.711	0.229631		5.83158	0.0788045			-0.39138	TRUE	0.495894	TRUE	3	20	1	80.4376				N
H8	hong-ck	CPK	UNKNOWN	SYBR	None	1	0.933917	1.07076	27.5572	27.4673	0.125165		6.22296	0.0465277			0	TRUE	0.495894	TRUE	3	21	1	80.4376				N
A3	hong	WRKY	UNKNOWN	SYBR	None	2.08455	1.77953	2.44185	32.9237	33.5406	0.298202		8.66115	0.107083			-1.05973	TRUE	0.691417	TRUE	3	22	1	82.7333				N
A4	hong-ck	WRKY	UNKNOWN	SYBR	None	1	0.806576	1.23981	31.0413	30.9652	0.434494		9.72088	0.146288			0	TRUE	0.691417	TRUE	3	25	1	82.5803				N
B3	hong	WRKY	UNKNOWN	SYBR	None	2.08455	1.77953	2.44185	33.442	33.5406	0.298202		8.66115	0.107083			-1.05973	TRUE	0.691417	TRUE	3	25	1	82.5803				N
B4	hong-ck	WRKY	UNKNOWN	SYBR	None	1	0.806576	1.23981	31.4846	30.9652	0.434494		9.72088	0.146288			0	TRUE	0.691417	TRUE	3	25	1	82.7333				N
C3	hong	WRKY	UNKNOWN	SYBR	None	2.08455	1.77953	2.44185	33.5592	33.5406	0.298202		8.66115	0.107083			-1.05973	TRUE	0.691417	TRUE	3	22	1	82.5803				N
C4	hong-ck	WRKY	UNKNOWN	SYBR	None	1	0.806576	1.23981	31.3738	30.9652	0.434494		9.72088	0.146288			0	TRUE	0.691417	TRUE	3	24	1	82.8864				N
D3	hong	WRKY	UNKNOWN	SYBR	None	2.08455	1.77953	2.44185	33.7491	33.5406	0.298202		8.66115	0.107083			-1.05973	TRUE	0.691417	TRUE	3	22	1	82.7333				N
D4	hong-ck	WRKY	UNKNOWN	SYBR	None	1	0.806576	1.23981	30.0029	30.9652	0.434494		9.72088	0.146288			0	TRUE	0.691417	TRUE	3	23	1	82.7333				N
D11	hong	WRKY	UNKNOWN	SYBR	None	2.08455	1.77953	2.44185	33.7887	33.5406	0.298202		8.66115	0.107083			-1.05973	TRUE	0.691417	TRUE	3	21	1	82.4272				N
D12	hong-ck	WRKY	UNKNOWN	SYBR	None	1	0.806576	1.23981	30.8882	30.9652	0.434494		9.72088	0.146288			0	TRUE	0.691417	TRUE	3	24	1	82.8864				N
E3	hong	WRKY	UNKNOWN	SYBR	None	2.08455	1.77953	2.44185	33.5206	33.5406	0.298202		8.66115	0.107083			-1.05973	TRUE	0.691417	TRUE	3	19	1	82.7333				N
E4	hong-ck	WRKY	UNKNOWN	SYBR	None	1	0.806576	1.23981	30.994	30.9652	0.434494		9.72088	0.146288			0	TRUE	0.691417	TRUE	3	24	1	82.8864				N
F3	hong	WRKY	UNKNOWN	SYBR	None	2.08455	1.77953	2.44185	33.8859	33.5406	0.298202		8.66115	0.107083			-1.05973	TRUE	0.691417	TRUE	3	22	1	82.7333				N
F4	hong-ck	WRKY	UNKNOWN	SYBR	None	1	0.806576	1.23981	30.7278	30.9652	0.434494		9.72088	0.146288			0	TRUE	0.691417	TRUE	3	24	1	82.8864				N
G3	hong	WRKY	UNKNOWN	SYBR	None	2.08455	1.77953	2.44185	33.4553	33.5406	0.298202		8.66115	0.107083			-1.05973	TRUE	0.691417	TRUE	3	19	1	82.5803				N
G4	hong-ck	WRKY	UNKNOWN	SYBR	None	1	0.806576	1.23981	30.931	30.9652	0.434494		9.72088	0.146288			0	TRUE	0.691417	TRUE	3	24	1	82.7333				N
H3	hong	WRKY	UNKNOWN	SYBR	None	2.08455	1.77953	2.44185	33.7887	33.5406	0.298202		8.66115	0.107083			-1.05973	TRUE	0.691417	TRUE	3	21	1	82.4272				N
H4	hong-ck	WRKY	UNKNOWN	SYBR	None	1	0.806576	1.23981	31.2434	30.9652	0.434494		9.72088	0.146288			0	TRUE	0.691417	TRUE	3	24	1	82.5803				N
Analysis Type	Singleplex
Endogenous Control	actin
RQ Min/Max Confidence Level	95.0
Reference Sample	hong-ck

## Sheet: Raw6
Block Type	96fast
Chemistry	SYBR_GREEN
Experiment File Name
Experiment Run End Time	Not Started
Instrument Type	sds7500fast
Passive Reference	ROX
Well	Sample Name	Target Name	Task	Reporter	Quencher	RQ	RQ Min	RQ Max	Cт	Cт Mean	Cт SD	ΔCт	ΔCт Mean	ΔCт SE	HK Control ΔCт Mean	HK Control ΔCт SE	ΔΔCт	Automatic Ct Threshold	Ct Threshold	Automatic Baseline	Baseline Start	Baseline End	Efficiency	Tm1	Tm2	Tm3	Comments
A1	hong	actin	UNKNOWN	SYBR	None				27.2913	27.1709	0.109165							TRUE	0.467159	TRUE	3	20	1	83.0549
A2	hong	actin	UNKNOWN	SYBR	None				27.2425	27.1709	0.109165							TRUE	0.467159	TRUE	3	21	1	83.0549
A3	hong	actin	UNKNOWN	SYBR	None				27.2282	27.1709	0.109165							TRUE	0.467159	TRUE	3	21	1	83.0549
A4	hong	actin	UNKNOWN	SYBR	None				27.0708	27.1709	0.109165							TRUE	0.467159	TRUE	3	20	1	83.2099
A5	hong	actin	UNKNOWN	SYBR	None				27.1619	27.1709	0.109165							TRUE	0.467159	TRUE	3	20	1	83.2099
A6	hong	actin	UNKNOWN	SYBR	None				26.9497	27.1709	0.109165							TRUE	0.467159	TRUE	3	20	1	83.3648
A7	hong	actin	UNKNOWN	SYBR	None				27.198	27.1709	0.109165							TRUE	0.467159	TRUE	3	21	1	83.3648
A8	hong	actin	UNKNOWN	SYBR	None				27.2729	27.1709	0.109165							TRUE	0.467159	TRUE	3	21	1	83.2099
A9	hong	actin	UNKNOWN	SYBR	None				27.123	27.1709	0.109165							TRUE	0.467159	TRUE	3	20	1	83.0549
B1	hong-ck	actin	UNKNOWN	SYBR	None				21.8068	21.7507	0.0932353							TRUE	0.467159	TRUE	3	15	1	83.0549
B2	hong-ck	actin	UNKNOWN	SYBR	None				21.7946	21.7507	0.0932353							TRUE	0.467159	TRUE	3	16	1	83.2099
B3	hong-ck	actin	UNKNOWN	SYBR	None				21.7125	21.7507	0.0932353							TRUE	0.467159	TRUE	3	15	1	83.3648
B4	hong-ck	actin	UNKNOWN	SYBR	None				21.662	21.7507	0.0932353							TRUE	0.467159	TRUE	3	15	1	83.3648
B5	hong-ck	actin	UNKNOWN	SYBR	None				21.6705	21.7507	0.0932353							TRUE	0.467159	TRUE	3	15	1	83.3648
B6	hong-ck	actin	UNKNOWN	SYBR	None				21.6553	21.7507	0.0932353							TRUE	0.467159	TRUE	3	15	1	83.5197
B10	hong-ck	actin	UNKNOWN	SYBR	None				21.6959	21.7507	0.0932353							TRUE	0.467159	TRUE	3	15	1	83.3648
B11	hong-ck	actin	UNKNOWN	SYBR	None				21.837	21.7507	0.0932353							TRUE	0.467159	TRUE	3	16	1	83.2099
B12	hong-ck	actin	UNKNOWN	SYBR	None				21.9215	21.7507	0.0932353							TRUE	0.467159	TRUE	3	16	1	83.0549
C1	hong	peroxidase	UNKNOWN	SYBR	None	8.51017	6.71806	10.7804	34.9356	34.9085	0.440842		7.73762	0.160053			-3.08919	TRUE	0.463964	TRUE	3	29	1	75.7732
C2	hong	peroxidase	UNKNOWN	SYBR	None	8.51017	6.71806	10.7804	35.1592	34.9085	0.440842		7.73762	0.160053			-3.08919	TRUE	0.463964	TRUE	3	29	1	76.0831
C4	hong	peroxidase	UNKNOWN	SYBR	None	8.51017	6.71806	10.7804	34.8099	34.9085	0.440842		7.73762	0.160053			-3.08919	TRUE	0.463964	TRUE	3	28	1	76.7028
C5	hong	peroxidase	UNKNOWN	SYBR	None	8.51017	6.71806	10.7804	35.7841	34.9085	0.440842		7.73762	0.160053			-3.08919	TRUE	0.463964	TRUE	3	29	1	77.3225
C6	hong	peroxidase	UNKNOWN	SYBR	None	8.51017	6.71806	10.7804	34.9742	34.9085	0.440842		7.73762	0.160053			-3.08919	TRUE	0.463964	TRUE	3	28	1	75.9282
C7	hong	peroxidase	UNKNOWN	SYBR	None	8.51017	6.71806	10.7804	34.7859	34.9085	0.440842		7.73762	0.160053			-3.08919	TRUE	0.463964	TRUE	3	28	1	76.5479
C8	hong	peroxidase	UNKNOWN	SYBR	None	8.51017	6.71806	10.7804	34.3674	34.9085	0.440842		7.73762	0.160053			-3.08919	TRUE	0.463964	TRUE	3	28	1	76.7028
C10	hong	peroxidase	UNKNOWN	SYBR	None	8.51017	6.71806	10.7804	34.8099	34.9085	0.440842		7.73762	0.160053			-3.08919	TRUE	0.463964	TRUE	3	28	1	76.7028
C12	hong	peroxidase	UNKNOWN	SYBR	None	8.51017	6.71806	10.7804	34.4521	34.9085	0.440842		7.73762	0.160053			-3.08919	TRUE	0.463964	TRUE	3	27	1	75.9282
D1	hong-ck	peroxidase	UNKNOWN	SYBR	None	1	0.842799	1.18652	32.9471	32.5775	0.336497		10.8268	0.116392			0	TRUE	0.463964	TRUE	3	27	1	80.731
D2	hong-ck	peroxidase	UNKNOWN	SYBR	None	1	0.842799	1.18652	32.4246	32.5775	0.336497		10.8268	0.116392			0	TRUE	0.463964	TRUE	3	26	1	80.731
D3	hong-ck	peroxidase	UNKNOWN	SYBR	None	1	0.842799	1.18652	32.7194	32.5775	0.336497		10.8268	0.116392			0	TRUE	0.463964	TRUE	3	27	1	80.8859
D4	hong-ck	peroxidase	UNKNOWN	SYBR	None	1	0.842799	1.18652	32.793	32.5775	0.336497		10.8268	0.116392			0	TRUE	0.463964	TRUE	3	27	1	80.8859
D5	hong-ck	peroxidase	UNKNOWN	SYBR	None	1	0.842799	1.18652	31.9579	32.5775	0.336497		10.8268	0.116392			0	TRUE	0.463964	TRUE	3	26	1	81.0408
D6	hong-ck	peroxidase	UNKNOWN	SYBR	None	1	0.842799	1.18652	32.5675	32.5775	0.336497		10.8268	0.116392			0	TRUE	0.463964	TRUE	3	26	1	81.0408
D7	hong-ck	peroxidase	UNKNOWN	SYBR	None	1	0.842799	1.18652	32.2102	32.5775	0.336497		10.8268	0.116392			0	TRUE	0.463964	TRUE	3	26	1	81.0408
D8	hong-ck	peroxidase	UNKNOWN	SYBR	None	1	0.842799	1.18652	32.6002	32.5775	0.336497		10.8268	0.116392			0	TRUE	0.463964	TRUE	3	27	1	80.731
D12	hong-ck	peroxidase	UNKNOWN	SYBR	None	1	0.842799	1.18652	32.9774	32.5775	0.336497		10.8268	0.116392			0	TRUE	0.463964	TRUE	3	27	1	80.731
E1	hong	PP2C	UNKNOWN	SYBR	None	2.16495	1.94969	2.40397	34.8585	34.784	0.131992		7.6131	0.0693431			-1.11433	TRUE	0.604713	TRUE	3	27	1	79.6465
E2	hong	PP2C	UNKNOWN	SYBR	None	2.16495	1.94969	2.40397	34.8006	34.784	0.131992		7.6131	0.0693431			-1.11433	TRUE	0.604713	TRUE	3	27	1	79.8014
E4	hong	PP2C	UNKNOWN	SYBR	None	2.16495	1.94969	2.40397	34.575	34.784	0.131992		7.6131	0.0693431			-1.11433	TRUE	0.604713	TRUE	3	28	1	79.9563
E5	hong	PP2C	UNKNOWN	SYBR	None	2.16495	1.94969	2.40397	34.9243	34.784	0.131992		7.6131	0.0693431			-1.11433	TRUE	0.604713	TRUE	3	27	1	79.8014
E6	hong	PP2C	UNKNOWN	SYBR	None	2.16495	1.94969	2.40397	34.8006	34.784	0.131992		7.6131	0.0693431			-1.11433	TRUE	0.604713	TRUE	3	27	1	79.8014
E8	hong	PP2C	UNKNOWN	SYBR	None	2.16495	1.94969	2.40397	34.7618	34.784	0.131992		7.6131	0.0693431			-1.11433	TRUE	0.604713	TRUE	3	27	1	79.9563
E9	hong	PP2C	UNKNOWN	SYBR	None	2.16495	1.94969	2.40397	34.575	34.784	0.131992		7.6131	0.0693431			-1.11433	TRUE	0.604713	TRUE	3	28	1	79.9563
E10	hong	PP2C	UNKNOWN	SYBR	None	2.16495	1.94969	2.40397	34.9243	34.784	0.131992		7.6131	0.0693431			-1.11433	TRUE	0.604713	TRUE	3	27	1	79.8014
E12	hong	PP2C	UNKNOWN	SYBR	None	2.16495	1.94969	2.40397	34.8585	34.784	0.131992		7.6131	0.0693431			-1.11433	TRUE	0.604713	TRUE	3	27	1	79.6465
F1	hong-ck	PP2C	UNKNOWN	SYBR	None	1	0.916981	1.09054	30.4022	30.4781	0.15039		8.72744	0.058982			0	TRUE	0.604713	TRUE	3	24	1	79.4915
F2	hong-ck	PP2C	UNKNOWN	SYBR	None	1	0.916981	1.09054	30.481	30.4781	0.15039		8.72744	0.058982			0	TRUE	0.604713	TRUE	3	24	1	79.6465
F3	hong-ck	PP2C	UNKNOWN	SYBR	None	1	0.916981	1.09054	30.3721	30.4781	0.15039		8.72744	0.058982			0	TRUE	0.604713	TRUE	3	24	1	79.6465
F4	hong-ck	PP2C	UNKNOWN	SYBR	None	1	0.916981	1.09054	30.1941	30.4781	0.15039		8.72744	0.058982			0	TRUE	0.604713	TRUE	3	24	1	79.8014
F7	hong-ck	PP2C	UNKNOWN	SYBR	None	1	0.916981	1.09054	30.5676	30.4781	0.15039		8.72744	0.058982			0	TRUE	0.604713	TRUE	3	24	1	79.8014
F8	hong-ck	PP2C	UNKNOWN	SYBR	None	1	0.916981	1.09054	30.6688	30.4781	0.15039		8.72744	0.058982			0	TRUE	0.604713	TRUE	3	24	1	79.8014
F9	hong-ck	PP2C	UNKNOWN	SYBR	None	1	0.916981	1.09054	30.446	30.4781	0.15039		8.72744	0.058982			0	TRUE	0.604713	TRUE	3	24	1	79.8014
F10	hong-ck	PP2C	UNKNOWN	SYBR	None	1	0.916981	1.09054	30.4998	30.4781	0.15039		8.72744	0.058982			0	TRUE	0.604713	TRUE	3	24	1	79.8014
F12	hong-ck	PP2C	UNKNOWN	SYBR	None	1	0.916981	1.09054	30.6714	30.4781	0.15039		8.72744	0.058982			0	TRUE	0.604713	TRUE	3	24	1	79.4915
G2	hong	MAP3K2	UNKNOWN	SYBR	None	4.10672	3.16674	5.32572	35.4533	35.3204	0.48685		8.14949	0.175932			-2.03799	TRUE	0.521466	TRUE	3	28	1	77.7873
G3	hong	MAP3K2	UNKNOWN	SYBR	None	4.10672	3.16674	5.32572	35.8957	35.3204	0.48685		8.14949	0.175932			-2.03799	TRUE	0.521466	TRUE	3	29	1	77.6324
G4	hong	MAP3K2	UNKNOWN	SYBR	None	4.10672	3.16674	5.32572	34.7832	35.3204	0.48685		8.14949	0.175932			-2.03799	TRUE	0.521466	TRUE	3	27	1	77.9423
G6	hong	MAP3K2	UNKNOWN	SYBR	None	4.10672	3.16674	5.32572	35.9482	35.3204	0.48685		8.14949	0.175932			-2.03799	TRUE	0.521466	TRUE	3	28	1	77.6324
G7	hong	MAP3K2	UNKNOWN	SYBR	None	4.10672	3.16674	5.32572	35.6285	35.3204	0.48685		8.14949	0.175932			-2.03799	TRUE	0.521466	TRUE	3	28	1	78.2521
G8	hong	MAP3K2	UNKNOWN	SYBR	None	4.10672	3.16674	5.32572	35.227	35.3204	0.48685		8.14949	0.175932			-2.03799	TRUE	0.521466	TRUE	3	27	1	77.1676
G9	hong	MAP3K2	UNKNOWN	SYBR	None	4.10672	3.16674	5.32572	34.7407	35.3204	0.48685		8.14949	0.175932			-2.03799	TRUE	0.521466	TRUE	3	27	1	78.0972
G10	hong	MAP3K2	UNKNOWN	SYBR	None	4.10672	3.16674	5.32572	34.7832	35.3204	0.48685		8.14949	0.175932			-2.03799	TRUE	0.521466	TRUE	3	27	1	77.9423
G11	hong	MAP3K2	UNKNOWN	SYBR	None	4.10672	3.16674	5.32572	34.8868	35.3204	0.48685		8.14949	0.175932			-2.03799	TRUE	0.521466	TRUE	3	28	1	77.3225
H1	hong-ck	MAP3K2	UNKNOWN	SYBR	None	1	0.848855	1.17806	31.6986	31.9382	0.301148		10.1875	0.110915			0	TRUE	0.521466	TRUE	3	25	1	77.6324
H3	hong-ck	MAP3K2	UNKNOWN	SYBR	None	1	0.848855	1.17806	31.9917	31.9382	0.301148		10.1875	0.110915			0	TRUE	0.521466	TRUE	3	26	1	77.7873
H4	hong-ck	MAP3K2	UNKNOWN	SYBR	None	1	0.848855	1.17806	32.2149	31.9382	0.301148		10.1875	0.110915			0	TRUE	0.521466	TRUE	3	26	1	79.1817
H5	hong-ck	MAP3K2	UNKNOWN	SYBR	None	1	0.848855	1.17806	31.9022	31.9382	0.301148		10.1875	0.110915			0	TRUE	0.521466	TRUE	3	26	1	77.9423
H6	hong-ck	MAP3K2	UNKNOWN	SYBR	None	1	0.848855	1.17806	32.314	31.9382	0.301148		10.1875	0.110915			0	TRUE	0.521466	TRUE	3	26	1	77.7873
H7	hong-ck	MAP3K2	UNKNOWN	SYBR	None	1	0.848855	1.17806	31.43	31.9382	0.301148		10.1875	0.110915			0	TRUE	0.521466	TRUE	3	25	1	77.9423
H9	hong-ck	MAP3K2	UNKNOWN	SYBR	None	1	0.848855	1.17806	31.6986	31.9382	0.301148		10.1875	0.110915			0	TRUE	0.521466	TRUE	3	25	1	77.6324
H10	hong-ck	MAP3K2	UNKNOWN	SYBR	None	1	0.848855	1.17806	31.7599	31.9382	0.301148		10.1875	0.110915			0	TRUE	0.521466	TRUE	3	25	1	77.9423
H11	hong-ck	MAP3K2	UNKNOWN	SYBR	None	1	0.848855	1.17806	32.194	31.9382	0.301148		10.1875	0.110915			0	TRUE	0.521466	TRUE	3	26	1	79.0268
Analysis Type	Singleplex
Endogenous Control	actin
RQ Min/Max Confidence Level	95.0
Reference Sample	hong-ck

## Sheet: Raw7
Block Type	96fast
Chemistry	SYBR_GREEN
Experiment File Name
Experiment Run End Time	Not Started
Instrument Type	sds7500fast
Passive Reference	ROX
Well	Sample Name	Target Name	Task	Reporter	Quencher	RQ	RQ Min	RQ Max	Cт	Cт Mean	Cт SD	ΔCт	ΔCт Mean	ΔCт SE	HK Control ΔCт Mean	HK Control ΔCт SE	ΔΔCт	Automatic Ct Threshold	Ct Threshold	Automatic Baseline	Baseline Start	Baseline End	Efficiency	Tm1	Tm2	Tm3	Comments
A1	hong	actin	UNKNOWN	SYBR	None				19.2558	19.5947	0.46134							TRUE	0.800681	TRUE	1	2	1	83.1479
A7	hong-ck	actin	UNKNOWN	SYBR	None				21.8714	21.8084	0.0803654							TRUE	0.800681	TRUE	3	15	1	83.4624
A11	hong	actin	UNKNOWN	SYBR	None				20.1713	19.5947	0.46134							TRUE	0.800681	TRUE	1	2	1	83.3052
A12	hong-ck	actin	UNKNOWN	SYBR	None				21.7393	21.8084	0.0803654							TRUE	0.800681	TRUE	3	15	1	83.6197
B1	hong	actin	UNKNOWN	SYBR	None				19.1534	19.5947	0.46134							TRUE	0.800681	TRUE	1	2	1	83.1479
B7	hong-ck	actin	UNKNOWN	SYBR	None				21.8318	21.8084	0.0803654							TRUE	0.800681	TRUE	3	15	1	83.4624
C1	hong	actin	UNKNOWN	SYBR	None				18.8329	19.5947	0.46134							TRUE	0.800681	TRUE	1	2	1	83.1479
C7	hong-ck	actin	UNKNOWN	SYBR	None				21.7393	21.8084	0.0803654							TRUE	0.800681	TRUE	3	15	1	83.6197
D1	hong	actin	UNKNOWN	SYBR	None				19.6485	19.5947	0.46134							TRUE	0.800681	TRUE	1	2	1	83.3052
D7	hong-ck	actin	UNKNOWN	SYBR	None				21.7097	21.8084	0.0803654							TRUE	0.800681	TRUE	3	15	1	83.6197
E1	hong	actin	UNKNOWN	SYBR	None				19.4668	19.5947	0.46134							TRUE	0.800681	TRUE	1	2	1	83.3052
E7	hong-ck	actin	UNKNOWN	SYBR	None				21.7065	21.8084	0.0803654							TRUE	0.800681	TRUE	3	15	1	83.6197
F1	hong	actin	UNKNOWN	SYBR	None				19.9459	19.5947	0.46134							TRUE	0.800681	TRUE	1	2	1	83.1479
F7	hong-ck	actin	UNKNOWN	SYBR	None				21.8145	21.8084	0.0803654							TRUE	0.800681	TRUE	3	15	1	83.6197
G1	hong	actin	UNKNOWN	SYBR	None				19.7138	19.5947	0.46134							TRUE	0.800681	TRUE	1	2	1	83.1479
G7	hong-ck	actin	UNKNOWN	SYBR	None				21.9034	21.8084	0.0803654							TRUE	0.800681	TRUE	3	15	1	83.4624
H1	hong	actin	UNKNOWN	SYBR	None				20.1635	19.5947	0.46134							TRUE	0.800681	TRUE	1	2	1	83.1479
H7	hong-ck	actin	UNKNOWN	SYBR	None				21.8905	21.8084	0.0803654							TRUE	0.800681	TRUE	3	15	1	83.3052
A3	hong	MYB	UNKNOWN	SYBR	None	11.1913	8.20166	15.2706	22.2292	23.0678	0.43566		3.47311	0.211511			-3.4843	TRUE	0.90391	TRUE	1	2	1	82.2042
A9	hong-ck	MYB	UNKNOWN	SYBR	None	1	0.932849	1.07198	28.7343	28.7658	0.105029		6.95741	0.046757			0	TRUE	0.90391	TRUE	3	22	1	82.3615
B3	hong	MYB	UNKNOWN	SYBR	None	11.1913	8.20166	15.2706	22.6935	23.0678	0.43566		3.47311	0.211511			-3.4843	TRUE	0.90391	TRUE	1	2	1	82.3615
B9	hong-ck	MYB	UNKNOWN	SYBR	None	1	0.932849	1.07198	28.671	28.7658	0.105029		6.95741	0.046757			0	TRUE	0.90391	TRUE	3	21	1	82.5188
C3	hong	MYB	UNKNOWN	SYBR	None	11.1913	8.20166	15.2706	23.3573	23.0678	0.43566		3.47311	0.211511			-3.4843	TRUE	0.90391	TRUE	1	2	1	82.5188
C9	hong-ck	MYB	UNKNOWN	SYBR	None	1	0.932849	1.07198	28.6975	28.7658	0.105029		6.95741	0.046757			0	TRUE	0.90391	TRUE	3	21	1	82.6761
D3	hong	MYB	UNKNOWN	SYBR	None	11.1913	8.20166	15.2706	23.1644	23.0678	0.43566		3.47311	0.211511			-3.4843	TRUE	0.90391	TRUE	1	2	1	82.5188
D9	hong-ck	MYB	UNKNOWN	SYBR	None	1	0.932849	1.07198	28.6434	28.7658	0.105029		6.95741	0.046757			0	TRUE	0.90391	TRUE	3	21	1	82.6761
E3	hong	MYB	UNKNOWN	SYBR	None	11.1913	8.20166	15.2706	23.1845	23.0678	0.43566		3.47311	0.211511			-3.4843	TRUE	0.90391	TRUE	1	2	1	82.5188
E9	hong-ck	MYB	UNKNOWN	SYBR	None	1	0.932849	1.07198	28.7662	28.7658	0.105029		6.95741	0.046757			0	TRUE	0.90391	TRUE	3	21	1	82.6761
E11	hong	MYB	UNKNOWN	SYBR	None	11.1913	8.20166	15.2706	23.6611	23.0678	0.43566		3.47311	0.211511			-3.4843	TRUE	0.90391	TRUE	1	2	1	81.8897
E12	hong-ck	MYB	UNKNOWN	SYBR	None	1	0.932849	1.07198	28.6975	28.7658	0.105029		6.95741	0.046757			0	TRUE	0.90391	TRUE	3	21	1	82.6761
F3	hong	MYB	UNKNOWN	SYBR	None	11.1913	8.20166	15.2706	23.4096	23.0678	0.43566		3.47311	0.211511			-3.4843	TRUE	0.90391	TRUE	1	2	1	82.5188
F9	hong-ck	MYB	UNKNOWN	SYBR	None	1	0.932849	1.07198	28.775	28.7658	0.105029		6.95741	0.046757			0	TRUE	0.90391	TRUE	3	22	1	82.6761
G3	hong	MYB	UNKNOWN	SYBR	None	11.1913	8.20166	15.2706	23.1477	23.0678	0.43566		3.47311	0.211511			-3.4843	TRUE	0.90391	TRUE	1	2	1	82.3615
G9	hong-ck	MYB	UNKNOWN	SYBR	None	1	0.932849	1.07198	28.9307	28.7658	0.105029		6.95741	0.046757			0	TRUE	0.90391	TRUE	3	22	1	82.5188
H3	hong	MYB	UNKNOWN	SYBR	None	11.1913	8.20166	15.2706	22.7628	23.0678	0.43566		3.47311	0.211511			-3.4843	TRUE	0.90391	TRUE	1	2	1	82.2042
H9	hong-ck	MYB	UNKNOWN	SYBR	None	1	0.932849	1.07198	28.9083	28.7658	0.105029		6.95741	0.046757			0	TRUE	0.90391	TRUE	3	22	1	82.3615
Analysis Type	Singleplex
Endogenous Control	actin
RQ Min/Max Confidence Level	95.0
Reference Sample	hong-ck

## Sheet: Raw8
Block Type	96fast
Chemistry	SYBR_GREEN
Experiment File Name
Experiment Run End Time
Instrument Type	sds7500fast
Passive Reference	ROX
Well	Sample Name	Target Name	Task	Reporter	Quencher	RQ	RQ Min	RQ Max	Cт	Cт Mean	Cт SD	ΔCт	ΔCт Mean	ΔCт SE	HK Control ΔCт Mean	HK Control ΔCт SE	ΔΔCт	Automatic Ct Threshold	Ct Threshold	Automatic Baseline	Baseline Start	Baseline End	Efficiency	Tm1	Tm2	Tm3	Comments
A1	hong-ck	actin	UNKNOWN	SYBR	None				27.6498	27.7117	0.0800593							TRUE	0.56521	TRUE	3	21	1	82.9938
A2	hong	actin	UNKNOWN	SYBR	None				21.8639	21.7642	0.0432355							TRUE	0.56521	TRUE	3	15	1	82.9938
A11	hong-ck	actin	UNKNOWN	SYBR	None				27.7031	27.7117	0.0800593							TRUE	0.56521	TRUE	3	20	1	83.1483
A12	hong	actin	UNKNOWN	SYBR	None				21.7447	21.7642	0.0432355							TRUE	0.56521	TRUE	3	15	1	83.1483
B1	hong-ck	actin	UNKNOWN	SYBR	None				27.6833	27.7117	0.0800593							TRUE	0.56521	TRUE	3	20	1	82.9938
B2	hong	actin	UNKNOWN	SYBR	None				21.7122	21.7642	0.0432355							TRUE	0.56521	TRUE	3	15	1	83.1483
C1	hong-ck	actin	UNKNOWN	SYBR	None				27.6583	27.7117	0.0800593							TRUE	0.56521	TRUE	3	20	1	82.9938
C2	hong	actin	UNKNOWN	SYBR	None				21.7808	21.7642	0.0432355							TRUE	0.56521	TRUE	3	15	1	83.1483
D1	hong-ck	actin	UNKNOWN	SYBR	None				27.8883	27.7117	0.0800593							TRUE	0.56521	TRUE	3	20	1	82.9938
D2	hong	actin	UNKNOWN	SYBR	None				21.743	21.7642	0.0432355							TRUE	0.56521	TRUE	3	15	1	83.3028
E1	hong-ck	actin	UNKNOWN	SYBR	None				27.7779	27.7117	0.0800593							TRUE	0.56521	TRUE	3	21	1	83.1483
E2	hong	actin	UNKNOWN	SYBR	None				21.7861	21.7642	0.0432355							TRUE	0.56521	TRUE	3	15	1	83.1483
F1	hong-ck	actin	UNKNOWN	SYBR	None				27.6341	27.7117	0.0800593							TRUE	0.56521	TRUE	3	20	1	82.9938
F2	hong	actin	UNKNOWN	SYBR	None				21.7534	21.7642	0.0432355							TRUE	0.56521	TRUE	3	15	1	83.1483
G1	hong-ck	actin	UNKNOWN	SYBR	None				27.7371	27.7117	0.0800593							TRUE	0.56521	TRUE	3	20	1	82.9938
G2	hong	actin	UNKNOWN	SYBR	None				21.7512	21.7642	0.0432355							TRUE	0.56521	TRUE	3	15	1	83.1483
H1	hong-ck	actin	UNKNOWN	SYBR	None				27.6732	27.7117	0.0800593							TRUE	0.56521	TRUE	3	20	1	82.8393
H2	hong	actin	UNKNOWN	SYBR	None				21.743	21.7642	0.0432355							TRUE	0.56521	TRUE	3	15	1	82.8393
A7	hong-ck	BHLH	UNKNOWN	SYBR	None	1	0.81592	1.22561	33.5291	33.5319	0.326295		5.82018	0.135856			0	TRUE	0.741871	TRUE	3	21	1	82.2213
A8	hong	BHLH	UNKNOWN	SYBR	None	0.448808	0.422366	0.476905	28.5335	28.7403	0.116192		6.97601	0.0413252			1.15583	TRUE	0.741871	TRUE	3	22	1	82.2213
B7	hong-ck	BHLH	UNKNOWN	SYBR	None	1	0.81592	1.22561	33.2291	33.5319	0.326295		5.82018	0.135856			0	TRUE	0.741871	TRUE	3	24	1	82.2213
B8	hong	BHLH	UNKNOWN	SYBR	None	0.448808	0.422366	0.476905	28.7075	28.7403	0.116192		6.97601	0.0413252			1.15583	TRUE	0.741871	TRUE	3	22	1	82.3758
C7	hong-ck	BHLH	UNKNOWN	SYBR	None	1	0.81592	1.22561	33.8107	33.5319	0.326295		5.82018	0.135856			0	TRUE	0.741871	TRUE	3	26	1	82.3758
C8	hong	BHLH	UNKNOWN	SYBR	None	0.448808	0.422366	0.476905	28.7569	28.7403	0.116192		6.97601	0.0413252			1.15583	TRUE	0.741871	TRUE	3	22	1	82.3758
D7	hong-ck	BHLH	UNKNOWN	SYBR	None	1	0.81592	1.22561	33.9298	33.5319	0.326295		5.82018	0.135856			0	TRUE	0.741871	TRUE	3	24	1	82.3758
D8	hong	BHLH	UNKNOWN	SYBR	None	0.448808	0.422366	0.476905	28.8645	28.7403	0.116192		6.97601	0.0413252			1.15583	TRUE	0.741871	TRUE	3	22	1	82.3758
E7	hong-ck	BHLH	UNKNOWN	SYBR	None	1	0.81592	1.22561	33.0858	33.5319	0.326295		5.82018	0.135856			0	TRUE	0.741871	TRUE	3	24	1	82.3758
E8	hong	BHLH	UNKNOWN	SYBR	None	0.448808	0.422366	0.476905	28.6387	28.7403	0.116192		6.97601	0.0413252			1.15583	TRUE	0.741871	TRUE	3	22	1	82.3758
F7	hong-ck	BHLH	UNKNOWN	SYBR	None	1	0.81592	1.22561	33.6067	33.5319	0.326295		5.82018	0.135856			0	TRUE	0.741871	TRUE	3	24	1	82.3758
F8	hong	BHLH	UNKNOWN	SYBR	None	0.448808	0.422366	0.476905	28.9079	28.7403	0.116192		6.97601	0.0413252			1.15583	TRUE	0.741871	TRUE	3	22	1	82.3758
G7	hong-ck	BHLH	UNKNOWN	SYBR	None	1	0.81592	1.22561	33.9298	33.5319	0.326295		5.82018	0.135856			0	TRUE	0.741871	TRUE	3	24	1	82.3758
G8	hong	BHLH	UNKNOWN	SYBR	None	0.448808	0.422366	0.476905	28.8316	28.7403	0.116192		6.97601	0.0413252			1.15583	TRUE	0.741871	TRUE	3	22	1	82.2213
H7	hong-ck	BHLH	UNKNOWN	SYBR	None	1	0.81592	1.22561	33.2291	33.5319	0.326295		5.82018	0.135856			0	TRUE	0.741871	TRUE	3	24	1	82.2213
H8	hong	BHLH	UNKNOWN	SYBR	None	0.448808	0.422366	0.476905	28.7119	28.7403	0.116192		6.97601	0.0413252			1.15583	TRUE	0.741871	TRUE	3	22	1	82.0668
H11	hong-ck	BHLH	UNKNOWN	SYBR	None	1	0.81592	1.22561	33.8107	33.5319	0.326295		5.82018	0.135856			0	TRUE	0.741871	TRUE	3	26	1	82.3758
H12	hong	BHLH	UNKNOWN	SYBR	None	0.448808	0.422366	0.476905	28.7097	28.7403	0.116192		6.97601	0.0413252			1.15583	TRUE	0.741871	TRUE	3	22	1	82.0668
A5	hong-ck	CML	UNKNOWN	SYBR	None	1	0.804495	1.24302	33.407	32.6442	0.409574		4.9325	0.147245			0	TRUE	0.686333	TRUE	3	25	1	81.7578
A6	hong	CML	UNKNOWN	SYBR	None	1.48434	1.22671	1.79608	25.5928	26.1269	0.386801		4.36267	0.129737			-0.569824	TRUE	0.686333	TRUE	3	19	1	82.0668
B5	hong-ck	CML	UNKNOWN	SYBR	None	1	0.804495	1.24302	32.9345	32.6442	0.409574		4.9325	0.147245			0	TRUE	0.686333	TRUE	3	26	1	81.7578
B6	hong	CML	UNKNOWN	SYBR	None	1.48434	1.22671	1.79608	26.1484	26.1269	0.386801		4.36267	0.129737			-0.569824	TRUE	0.686333	TRUE	3	19	1	81.9123
C5	hong-ck	CML	UNKNOWN	SYBR	None	1	0.804495	1.24302	32.492	32.6442	0.409574		4.9325	0.147245			0	TRUE	0.686333	TRUE	3	24	1	81.9123
C6	hong	CML	UNKNOWN	SYBR	None	1.48434	1.22671	1.79608	26.1961	26.1269	0.386801		4.36267	0.129737			-0.569824	TRUE	0.686333	TRUE	3	19	1	82.0668
D5	hong-ck	CML	UNKNOWN	SYBR	None	1	0.804495	1.24302	32.4615	32.6442	0.409574		4.9325	0.147245			0	TRUE	0.686333	TRUE	3	24	1	81.9123
D6	hong	CML	UNKNOWN	SYBR	None	1.48434	1.22671	1.79608	26.1957	26.1269	0.386801		4.36267	0.129737			-0.569824	TRUE	0.686333	TRUE	3	19	1	81.9123
E5	hong-ck	CML	UNKNOWN	SYBR	None	1	0.804495	1.24302	32.2258	32.6442	0.409574		4.9325	0.147245			0	TRUE	0.686333	TRUE	3	24	1	81.9123
E6	hong	CML	UNKNOWN	SYBR	None	1.48434	1.22671	1.79608	26.3543	26.1269	0.386801		4.36267	0.129737			-0.569824	TRUE	0.686333	TRUE	3	19	1	81.9123
F5	hong-ck	CML	UNKNOWN	SYBR	None	1	0.804495	1.24302	32.9277	32.6442	0.409574		4.9325	0.147245			0	TRUE	0.686333	TRUE	3	24	1	81.7578
F6	hong	CML	UNKNOWN	SYBR	None	1.48434	1.22671	1.79608	26.352	26.1269	0.386801		4.36267	0.129737			-0.569824	TRUE	0.686333	TRUE	3	19	1	81.9123
F11	hong-ck	CML	UNKNOWN	SYBR	None	1	0.804495	1.24302	32.492	32.6442	0.409574		4.9325	0.147245			0	TRUE	0.686333	TRUE	3	24	1	81.9123
F12	hong	CML	UNKNOWN	SYBR	None	1.48434	1.22671	1.79608	25.3729	26.1269	0.386801		4.36267	0.129737			-0.569824	TRUE	0.686333	TRUE	3	18	1	82.2213
G5	hong-ck	CML	UNKNOWN	SYBR	None	1	0.804495	1.24302	32.4661	32.6442	0.409574		4.9325	0.147245			0	TRUE	0.686333	TRUE	3	24	1	81.7578
G6	hong	CML	UNKNOWN	SYBR	None	1.48434	1.22671	1.79608	26.4982	26.1269	0.386801		4.36267	0.129737			-0.569824	TRUE	0.686333	TRUE	3	19	1	81.7578
H5	hong-ck	CML	UNKNOWN	SYBR	None	1	0.804495	1.24302	32.2387	32.6442	0.409574		4.9325	0.147245			0	TRUE	0.686333	TRUE	3	24	1	81.6033
H6	hong	CML	UNKNOWN	SYBR	None	1.48434	1.22671	1.79608	26.4318	26.1269	0.386801		4.36267	0.129737			-0.569824	TRUE	0.686333	TRUE	3	20	1	81.6033
A9	hong-ck	CNGC	UNKNOWN	SYBR	None	1	0.789369	1.26683	35.5378	35.5373	0.345074		7.82564	0.156612			0	TRUE	0.568557	TRUE	3	27	1	82.3758
A10	hong	CNGC	UNKNOWN	SYBR	None	0.384583	0.352733	0.419309	30.8814	30.9685	0.171119		9.20427	0.0588323			1.37863	TRUE	0.568557	TRUE	3	24	1	82.5303
B9	hong-ck	CNGC	UNKNOWN	SYBR	None	1	0.789369	1.26683	35.6278	35.5373	0.345074		7.82564	0.156612			0	TRUE	0.568557	TRUE	3	28	1	82.5303
B10	hong	CNGC	UNKNOWN	SYBR	None	0.384583	0.352733	0.419309	30.9417	30.9685	0.171119		9.20427	0.0588323			1.37863	TRUE	0.568557	TRUE	3	24	1	82.5303
C9	hong-ck	CNGC	UNKNOWN	SYBR	None	1	0.789369	1.26683	35.5762	35.5373	0.345074		7.82564	0.156612			0	TRUE	0.568557	TRUE	3	28	1	82.5303
C10	hong	CNGC	UNKNOWN	SYBR	None	0.384583	0.352733	0.419309	30.8976	30.9685	0.171119		9.20427	0.0588323			1.37863	TRUE	0.568557	TRUE	3	24	1	82.5303
C11	hong-ck	CNGC	UNKNOWN	SYBR	None	1	0.789369	1.26683	35.5378	35.5373	0.345074		7.82564	0.156612			0	TRUE	0.568557	TRUE	3	27	1	82.3758
C12	hong	CNGC	UNKNOWN	SYBR	None	0.384583	0.352733	0.419309	30.994	30.9685	0.171119		9.20427	0.0588323			1.37863	TRUE	0.568557	TRUE	3	24	1	82.6848
D9	hong-ck	CNGC	UNKNOWN	SYBR	None	1	0.789369	1.26683	34.9938	35.5373	0.345074		7.82564	0.156612			0	TRUE	0.568557	TRUE	3	27	1	82.6848
D10	hong	CNGC	UNKNOWN	SYBR	None	0.384583	0.352733	0.419309	30.9937	30.9685	0.171119		9.20427	0.0588323			1.37863	TRUE	0.568557	TRUE	3	24	1	82.6848
E9	hong-ck	CNGC	UNKNOWN	SYBR	None	1	0.789369	1.26683	35.951	35.5373	0.345074		7.82564	0.156612			0	TRUE	0.568557	TRUE	3	29	1	82.5303
E10	hong	CNGC	UNKNOWN	SYBR	None	0.384583	0.352733	0.419309	30.6551	30.9685	0.171119		9.20427	0.0588323			1.37863	TRUE	0.568557	TRUE	3	24	1	82.6848
F9	hong-ck	CNGC	UNKNOWN	SYBR	None	1	0.789369	1.26683	35.5762	35.5373	0.345074		7.82564	0.156612			0	TRUE	0.568557	TRUE	3	28	1	82.5303
F10	hong	CNGC	UNKNOWN	SYBR	None	0.384583	0.352733	0.419309	30.9356	30.9685	0.171119		9.20427	0.0588323			1.37863	TRUE	0.568557	TRUE	3	24	1	82.6848
G9	hong-ck	CNGC	UNKNOWN	SYBR	None	1	0.789369	1.26683	35.6278	35.5373	0.345074		7.82564	0.156612			0	TRUE	0.568557	TRUE	3	28	1	82.5303
G10	hong	CNGC	UNKNOWN	SYBR	None	0.384583	0.352733	0.419309	31.159	30.9685	0.171119		9.20427	0.0588323			1.37863	TRUE	0.568557	TRUE	3	24	1	82.5303
H9	hong-ck	CNGC	UNKNOWN	SYBR	None	1	0.789369	1.26683	35.6278	35.5373	0.345074		7.82564	0.156612			0	TRUE	0.568557	TRUE	3	28	1	82.5303
H10	hong	CNGC	UNKNOWN	SYBR	None	0.384583	0.352733	0.419309	31.2585	30.9685	0.171119		9.20427	0.0588323			1.37863	TRUE	0.568557	TRUE	3	25	1	82.3758
Analysis Type	Singleplex
Endogenous Control	actin
RQ Min/Max Confidence Level	95.0
Reference Sample	hong-ck

## Sheet: Raw9
Block Type	96fast
Chemistry	SYBR_GREEN
Experiment File Name
Experiment Run End Time	Not Started
Instrument Type	sds7500fast
Passive Reference	ROX
Well	Sample Name	Target Name	Task	Reporter	Quencher	RQ	RQ Min	RQ Max	Cт	Cт Mean	Cт SD	ΔCт	ΔCт Mean	ΔCт SE	HK Control ΔCт Mean	HK Control ΔCт SE	ΔΔCт	Automatic Ct Threshold	Ct Threshold	Automatic Baseline	Baseline Start	Baseline End	Efficiency	Tm1	Tm2	Tm3	Comments
A1	hong-ck	actin	UNKNOWN	SYBR	None				26.8955	26.7641	0.111299							TRUE	0.669434	TRUE	3	12	1	82.9957
A2	hong	actin	UNKNOWN	SYBR	None				21.4792	21.3874	0.046412							TRUE	0.669434	TRUE	3	15	1	82.9957
B1	hong-ck	actin	UNKNOWN	SYBR	None				26.585	26.7641	0.111299							TRUE	0.669434	TRUE	3	13	1	83.3105
B2	hong	actin	UNKNOWN	SYBR	None				21.4229	21.3874	0.046412							TRUE	0.669434	TRUE	3	14	1	83.1531
B9	hong-ck	actin	UNKNOWN	SYBR	None				26.8772	26.7641	0.111299							TRUE	0.669434	TRUE	3	9	1	83.1531
B10	hong	actin	UNKNOWN	SYBR	None				21.3809	21.3874	0.046412							TRUE	0.669434	TRUE	3	15	1	83.4679
C1	hong-ck	actin	UNKNOWN	SYBR	None				26.8283	26.7641	0.111299							TRUE	0.669434	TRUE	3	11	1	83.1531
C2	hong	actin	UNKNOWN	SYBR	None				21.4233	21.3874	0.046412							TRUE	0.669434	TRUE	3	14	1	83.3105
D1	hong-ck	actin	UNKNOWN	SYBR	None				26.7603	26.7641	0.111299							TRUE	0.669434	TRUE	3	13	1	83.1531
D2	hong	actin	UNKNOWN	SYBR	None				21.334	21.3874	0.046412							TRUE	0.669434	TRUE	3	15	1	83.3105
E1	hong-ck	actin	UNKNOWN	SYBR	None				26.8772	26.7641	0.111299							TRUE	0.669434	TRUE	3	9	1	83.1531
E2	hong	actin	UNKNOWN	SYBR	None				21.3528	21.3874	0.046412							TRUE	0.669434	TRUE	3	15	1	83.3105
F1	hong-ck	actin	UNKNOWN	SYBR	None				26.8955	26.7641	0.111299							TRUE	0.669434	TRUE	3	12	1	82.9957
F2	hong	actin	UNKNOWN	SYBR	None				21.3544	21.3874	0.046412							TRUE	0.669434	TRUE	3	14	1	83.3105
G1	hong-ck	actin	UNKNOWN	SYBR	None				26.7095	26.7641	0.111299							TRUE	0.669434	TRUE	3	12	1	82.9957
G2	hong	actin	UNKNOWN	SYBR	None				21.3847	21.3874	0.046412							TRUE	0.669434	TRUE	3	15	1	83.1531
H1	hong-ck	actin	UNKNOWN	SYBR	None				26.6928	26.7641	0.111299							TRUE	0.669434	TRUE	3	12	1	82.8383
H2	hong	actin	UNKNOWN	SYBR	None				21.3547	21.3874	0.046412							TRUE	0.669434	TRUE	3	15	1	82.9957
A5	hong-ck	PG	UNKNOWN	SYBR	None	1	0.872094	1.14667	31.478	31.6852	0.174396		4.92114	0.0886139			0	TRUE	0.379486	TRUE	3	10	1	80.6344
A6	hong	PG	UNKNOWN	SYBR	None	0.751081	0.700846	0.804916	26.6199	26.7215	0.133494		5.3341	0.0471106			0.41296	TRUE	0.379486	TRUE	3	21	1	80.477
B5	hong-ck	PG	UNKNOWN	SYBR	None	1	0.872094	1.14667	31.478	31.6852	0.174396		4.92114	0.0886139			0	TRUE	0.379486	TRUE	3	10	1	80.6344
B6	hong	PG	UNKNOWN	SYBR	None	0.751081	0.700846	0.804916	26.7207	26.7215	0.133494		5.3341	0.0471106			0.41296	TRUE	0.379486	TRUE	3	21	1	80.6344
C5	hong-ck	PG	UNKNOWN	SYBR	None	1	0.872094	1.14667	31.65	31.6852	0.174396		4.92114	0.0886139			0	TRUE	0.379486	TRUE	3	8	1	80.6344
C6	hong	PG	UNKNOWN	SYBR	None	0.751081	0.700846	0.804916	26.6525	26.7215	0.133494		5.3341	0.0471106			0.41296	TRUE	0.379486	TRUE	3	21	1	80.6344
D5	hong-ck	PG	UNKNOWN	SYBR	None	1	0.872094	1.14667	31.5745	31.6852	0.174396		4.92114	0.0886139			0	TRUE	0.379486	TRUE	3	10	1	80.6344
D6	hong	PG	UNKNOWN	SYBR	None	0.751081	0.700846	0.804916	26.8477	26.7215	0.133494		5.3341	0.0471106			0.41296	TRUE	0.379486	TRUE	3	21	1	80.7919
E5	hong-ck	PG	UNKNOWN	SYBR	None	1	0.872094	1.14667	31.8241	31.6852	0.174396		4.92114	0.0886139			0	TRUE	0.379486	TRUE	3	8	1	80.7919
E6	hong	PG	UNKNOWN	SYBR	None	0.751081	0.700846	0.804916	26.8976	26.7215	0.133494		5.3341	0.0471106			0.41296	TRUE	0.379486	TRUE	3	21	1	80.7919
E9	hong-ck	PG	UNKNOWN	SYBR	None	1	0.872094	1.14667	31.8996	31.6852	0.174396		4.92114	0.0886139			0	TRUE	0.379486	TRUE	3	21	1	80.6344
E10	hong	PG	UNKNOWN	SYBR	None	0.751081	0.700846	0.804916	26.8893	26.7215	0.133494		5.3341	0.0471106			0.41296	TRUE	0.379486	TRUE	3	21	1	80.6344
F5	hong-ck	PG	UNKNOWN	SYBR	None	1	0.872094	1.14667	31.65	31.6852	0.174396		4.92114	0.0886139			0	TRUE	0.379486	TRUE	3	8	1	80.6344
F6	hong	PG	UNKNOWN	SYBR	None	0.751081	0.700846	0.804916	26.5228	26.7215	0.133494		5.3341	0.0471106			0.41296	TRUE	0.379486	TRUE	3	21	1	80.6344
G5	hong-ck	PG	UNKNOWN	SYBR	None	1	0.872094	1.14667	31.8241	31.6852	0.174396		4.92114	0.0886139			0	TRUE	0.379486	TRUE	3	8	1	80.7919
G6	hong	PG	UNKNOWN	SYBR	None	0.751081	0.700846	0.804916	26.7347	26.7215	0.133494		5.3341	0.0471106			0.41296	TRUE	0.379486	TRUE	3	21	1	80.6344
H5	hong-ck	PG	UNKNOWN	SYBR	None	1	0.872094	1.14667	31.5745	31.6852	0.174396		4.92114	0.0886139			0	TRUE	0.379486	TRUE	3	10	1	80.6344
H6	hong	PG	UNKNOWN	SYBR	None	0.751081	0.700846	0.804916	26.6086	26.7215	0.133494		5.3341	0.0471106			0.41296	TRUE	0.379486	TRUE	3	20	1	80.477
Analysis Type	Singleplex
Endogenous Control	actin
RQ Min/Max Confidence Level	95.0
Reference Sample	hong-ck
